# Supplementary material for: EIF1AX and RAS Mutations Cooperate to Drive Thyroid Tumorigenesis through ATF4 and c-MYC
Source: Oxford University Press journal article supplement (doi:10.1158/2159-8290.cd-18-0606), 2018-10-10
Supplement: 21598290cd180606-sup-202575_2_supp_5068109_pfxppb.xlsx [file 21598290cd180606-sup-202575_2_supp_5068109_pfxppb.xlsx]

## Sheet: C643_TE-UP
List of genes efficiently translated (TE-UP) in C643 vs. C643-spl-rev cells by ribosome profiling
ensembl_gene_id	hgnc_symbol	id	disper	pval	padj	TE_C643	TE_C643-spl-rev	log2FC_TE.C643vs.C643spl-rev
ENSG00000173801	JUP	ENSG00000173801.12	0.00699694	1.16372e-11	1.30195e-08	0.0713651	0.0162634	2.13359
ENSG00000139182	CLSTN3	ENSG00000139182.9	0.00745235	4.59961e-10	2.89459e-07	0.0947143	0.0320669	1.5625
ENSG00000173674	EIF1AX	ENSG00000173674.6	0.00431901	3.39523e-08	1.36746e-05	0.00106194	0.000182976	2.53697
ENSG00000120742	SERP1	ENSG00000120742.6	0.0018433	3.81879e-08	1.46588e-05	0.00308289	0.0014797	1.05898
ENSG00000173334	TRIB1	ENSG00000173334.3	0.00292048	4.3675e-08	1.46588e-05	0.00518494	0.000336618	3.94514
ENSG00000120217	CD274	ENSG00000120217.9	0.00213704	4.00312e-07	0.000106072	0.00283733	0.00121106	1.22826
ENSG00000146648	EGFR	ENSG00000146648.11	0.00109495	1.76843e-06	0.000317969	0.00300427	0.00173331	0.793483
ENSG00000118523	CTGF	ENSG00000118523.5	0.00360243	2.0086e-06	0.000354818	0.0149982	0.00998179	0.587416
ENSG00000152348	ATG10	ENSG00000152348.11	0.00332371	2.13702e-06	0.000365569	0.00127027	0.000416245	1.60963
ENSG00000177556	ATOX1	ENSG00000177556.7	0.0040367	3.30606e-06	0.000520136	0.00755495	0.00359307	1.07221
ENSG00000111817	DSE	ENSG00000111817.12	0.000943524	3.68165e-06	0.000570316	0.00368555	0.00176135	1.0652
ENSG00000109971	HSPA8	ENSG00000109971.9	0.00457802	4.34198e-06	0.000651589	0.00139103	0.000895932	0.63469
ENSG00000186480	INSIG1	ENSG00000186480.8	0.00167371	4.40044e-06	0.000651589	0.00849992	0.00421415	1.01221
ENSG00000163191	S100A11	ENSG00000163191.5	0.00106963	4.92172e-06	0.000699918	0.00750215	0.00462042	0.699282
ENSG00000115307	AUP1	ENSG00000115307.12	0.00124877	5.05232e-06	0.000706552	0.00336474	0.00208812	0.68829
ENSG00000136271	DDX56	ENSG00000136271.6	0.00215038	7.12488e-06	0.00091869	0.00283164	0.00128478	1.14012
ENSG00000083845	RPS5	ENSG00000083845.4	0.00293446	7.52715e-06	0.000938927	0.00313554	0.00204735	0.614958
ENSG00000171033	PKIA	ENSG00000171033.8	0.00355954	7.55319e-06	0.000938927	0.00123718	7.9661e-05	3.95704
ENSG00000125485	DDX31	ENSG00000125485.13	0.00145327	8.84968e-06	0.00104832	0.00213289	0.000322833	2.72395
ENSG00000198034	RPS4X	ENSG00000198034.6	0.00253391	9.12646e-06	0.00106854	0.00157332	0.000970859	0.696479
ENSG00000138166	DUSP5	ENSG00000138166.5	0.00183281	1.00359e-05	0.00113541	0.00313408	0.000306702	3.35313
ENSG00000109475	RPL34	ENSG00000109475.12	0.00215622	1.43944e-05	0.00155846	0.00246412	0.00127038	0.955814
ENSG00000117525	F3	ENSG00000117525.9	0.00219456	2.09245e-05	0.00206558	0.004034	0.00255743	0.657514
ENSG00000177954	RPS27	ENSG00000177954.7	0.00267239	2.57494e-05	0.00246924	0.00965275	0.00147418	2.71103
ENSG00000133398	MED10	ENSG00000133398.3	0.00693987	2.71568e-05	0.00257964	0.00437421	0.00083855	2.38305
ENSG00000114784	EIF1B	ENSG00000114784.3	0.00162529	2.85368e-05	0.00268539	0.0065391	0.00217661	1.58701
ENSG00000173726	TOMM20	ENSG00000173726.6	0.00163895	3.66329e-05	0.00329337	0.0022913	0.000985246	1.21761
ENSG00000101361	NOP56	ENSG00000101361.10	0.000762772	4.36942e-05	0.00372845	0.00299235	0.00196985	0.603195
ENSG00000106443	PHF14	ENSG00000106443.10	0.00214946	4.51868e-05	0.00382341	0.00275029	0.000670183	2.03696
ENSG00000118454	ANKRD13C	ENSG00000118454.8	0.0015309	4.65043e-05	0.00386985	0.00168993	0.000580708	1.54108
ENSG00000174021	GNG5	ENSG00000174021.6	0.0013684	5.04651e-05	0.00410144	0.00438366	0.00243575	0.847767
ENSG00000197756	RPL37A	ENSG00000197756.5	0.00427118	5.56291e-05	0.00448103	0.00352817	0.0022625	0.641004
ENSG00000249992	TMEM158	ENSG00000249992.1	0.0041235	6.05133e-05	0.00477346	0.00718678	0.00212641	1.75692
ENSG00000114383	TUSC2	ENSG00000114383.5	0.00601807	6.06816e-05	0.00477346	0.00692957	0.0020023	1.79111
ENSG00000144895	EIF2A	ENSG00000144895.7	0.00282361	6.30359e-05	0.00492022	0.00311019	0.00172267	0.85236
ENSG00000130255	RPL36	ENSG00000130255.8	0.00478827	6.57471e-05	0.00499438	0.00447065	0.00283713	0.656054
ENSG00000115380	EFEMP1	ENSG00000115380.14	0.00186587	6.67566e-05	0.00499438	0.0126372	0.00705708	0.840529
ENSG00000242485	MRPL20	ENSG00000242485.1	0.00192319	6.68658e-05	0.00499438	0.00344653	0.00160829	1.09962
ENSG00000129562	DAD1	ENSG00000129562.6	0.00134999	6.70671e-05	0.00499438	0.00992587	0.00692129	0.520153
ENSG00000122406	RPL5	ENSG00000122406.8	0.00171615	6.77299e-05	0.00499438	0.00176643	0.00121938	0.534688
ENSG00000144535	DIS3L2	ENSG00000144535.15	0.00250194	6.79542e-05	0.00499438	0.00240419	0.000277428	3.11536
ENSG00000122034	GTF3A	ENSG00000122034.8	0.00293444	6.85553e-05	0.00500205	0.00201511	0.000604846	1.73622
ENSG00000104522	TSTA3	ENSG00000104522.11	0.00307517	7.63437e-05	0.00537556	0.00515481	0.00210942	1.28907
ENSG00000026559	KCNG1	ENSG00000026559.9	0.00856851	7.76908e-05	0.00543242	0.00602042	0.00245171	1.29608
ENSG00000105700	KXD1	ENSG00000105700.6	0.0045824	7.86102e-05	0.0054588	0.00284357	0.000991405	1.52016
ENSG00000164077	MON1A	ENSG00000164077.9	0.00862996	8.20658e-05	0.00562123	0.00414808	0.000627114	2.72565
ENSG00000133065	SLC41A1	ENSG00000133065.6	0.00190641	8.2842e-05	0.00563605	0.00307278	0.00106134	1.53366
ENSG00000138074	SLC5A6	ENSG00000138074.10	0.00126627	9.23514e-05	0.00607769	0.00517493	0.00247354	1.06496
ENSG00000138326	RPS24	ENSG00000138326.14	0.00837511	0.000113376	0.00709057	0.00136775	0.000737456	0.891178
ENSG00000120129	DUSP1	ENSG00000120129.5	0.00253575	0.000127236	0.00771769	0.00365659	0.00211111	0.792496
ENSG00000116717	GADD45A	ENSG00000116717.7	0.00354094	0.000129086	0.00778303	0.00484068	0.0025136	0.945453
ENSG00000129128	SPCS3	ENSG00000129128.8	0.00404386	0.000131069	0.00785556	0.00424254	0.00260229	0.705145
ENSG00000149948	HMGA2	ENSG00000149948.9	0.00308525	0.000137887	0.00803056	0.00156736	0.000692902	1.17762
ENSG00000263809	ENSG00000263809	ENSG00000263809.1	0.00409949	0.00014013	0.00806266	0.00081414	0.000380111	1.09886
ENSG00000204520	MICA	ENSG00000204520.8	0.00203722	0.000148104	0.00847304	0.00613072	0.00292375	1.06824
ENSG00000143942	CHAC2	ENSG00000143942.4	0.00486944	0.000154834	0.00876383	0.00374946	0.00045868	3.03112
ENSG00000047932	GOPC	ENSG00000047932.9	0.00263079	0.000154927	0.00876383	0.00224567	0.00119882	0.905529
ENSG00000119714	GPR68	ENSG00000119714.6	0.127838	0.000160732	0.00904141	0.27783	0.0562491	2.3043
ENSG00000157045	NTAN1	ENSG00000157045.4	0.00243169	0.000175637	0.00961138	0.00477375	0.000855247	2.48071
ENSG00000205426	KRT81	ENSG00000205426.6	0.00778008	0.000178086	0.00969269	0.0054627	0.00357944	0.60988
ENSG00000163867	ZMYM6	ENSG00000163867.12	0.00462844	0.000181781	0.00983635	0.00238474	0.000609247	1.96873
ENSG00000145592	RPL37	ENSG00000145592.9	0.00186919	0.000195689	0.0103763	0.00213676	0.00150551	0.505174
ENSG00000148841	ITPRIP	ENSG00000148841.11	0.00863156	0.000203417	0.0107236	0.00598838	0.00250119	1.25955
ENSG00000115350	POLE4	ENSG00000115350.7	0.00241804	0.000219594	0.011339	0.00287011	0.000941543	1.608
ENSG00000149273	RPS3	ENSG00000149273.10	0.00256365	0.000224041	0.0115096	0.00184254	0.00111957	0.718751
ENSG00000116455	WDR77	ENSG00000116455.9	0.00140105	0.000225232	0.011512	0.0028403	0.00150854	0.912893
ENSG00000177679	SRRM3	ENSG00000177679.14	0.00428193	0.000228637	0.011627	0.0787737	0.0160094	2.2988
ENSG00000138623	SEMA7A	ENSG00000138623.5	0.0045851	0.000230192	0.0116472	0.00730714	0.00477865	0.612704
ENSG00000124593	ENSG00000124593	ENSG00000124593.10	0.00257431	0.000234626	0.0118123	0.00275632	0.00163061	0.757328
ENSG00000137331	IER3	ENSG00000137331.11	0.0149128	0.000247636	0.012283	0.00366895	0.00183383	1.00051
ENSG00000213741	RPS29	ENSG00000213741.4	0.00330584	0.000249138	0.0122969	0.00330607	0.00192961	0.776805
ENSG00000113812	ACTR8	ENSG00000113812.9	0.00212382	0.000259948	0.0126484	0.00282292	0.000940854	1.58515
ENSG00000108561	C1QBP	ENSG00000108561.4	0.000929973	0.000260028	0.0126484	0.00497848	0.00309456	0.68597
ENSG00000011198	ABHD5	ENSG00000011198.3	0.00465792	0.000269212	0.0129081	0.002664	0.000486124	2.4542
ENSG00000012223	LTF	ENSG00000012223.8	0.00589949	0.000273508	0.0129607	0.0940979	0.00809439	3.53917
ENSG00000144959	NCEH1	ENSG00000144959.5	0.00316067	0.000274172	0.0129607	0.00611776	0.00369777	0.726347
ENSG00000214736	TOMM6	ENSG00000214736.3	0.00265892	0.000315608	0.0144633	0.00278619	0.00166	0.747112
ENSG00000089157	RPLP0	ENSG00000089157.11	0.00325077	0.000328889	0.0148501	0.00123572	0.000741048	0.737715
ENSG00000132768	DPH2	ENSG00000132768.9	0.003795	0.000371257	0.0163029	0.00144107	0.000482565	1.57834
ENSG00000180398	MCFD2	ENSG00000180398.7	0.00167791	0.000372398	0.0163029	0.00229679	0.00160931	0.513183
ENSG00000110076	NRXN2	ENSG00000110076.14	0.00479554	0.000377564	0.0164575	0.168511	0.0359535	2.22864
ENSG00000173812	EIF1	ENSG00000173812.6	0.00607722	0.000393457	0.0169304	0.00484021	0.00314829	0.6205
ENSG00000142871	CYR61	ENSG00000142871.11	0.00709343	0.000409095	0.0172351	0.0329687	0.0232029	0.506792
ENSG00000129625	REEP5	ENSG00000129625.8	0.00173808	0.00042982	0.0177371	0.0064041	0.00435254	0.557137
ENSG00000163479	SSR2	ENSG00000163479.9	0.00185666	0.000461626	0.0187424	0.00873436	0.00566618	0.624324
ENSG00000147853	AK3	ENSG00000147853.12	0.00325522	0.000477528	0.0193102	0.0027506	0.00091241	1.59199
ENSG00000177600	RPLP2	ENSG00000177600.4	0.00658938	0.000504498	0.0202382	0.0043704	0.00284333	0.620182
ENSG00000264364	DYNLL2	ENSG00000264364.2	0.00273293	0.000524933	0.0209545	0.00301656	0.00137539	1.13306
ENSG00000173511	VEGFB	ENSG00000173511.5	0.0095416	0.000536628	0.0211317	0.00555777	0.000315219	4.14008
ENSG00000136933	RABEPK	ENSG00000136933.12	0.00197386	0.000546619	0.021416	0.00224637	0.000758829	1.56575
ENSG00000115840	SLC25A12	ENSG00000115840.9	0.00197869	0.000560585	0.0217341	0.00328138	0.000862389	1.92789
ENSG00000161981	SNRNP25	ENSG00000161981.6	0.00316214	0.000628118	0.0238661	0.00440978	0.00150576	1.55022
ENSG00000173457	PPP1R14B	ENSG00000173457.6	0.00972086	0.000692351	0.0258299	0.0012395	0.000210411	2.55848
ENSG00000122863	CHST3	ENSG00000122863.5	0.00318622	0.000709706	0.0262722	0.00234917	0.000806867	1.54175
ENSG00000104093	DMXL2	ENSG00000104093.9	0.00201735	0.000719675	0.0264036	0.00224479	0.00061693	1.8634
ENSG00000230989	HSBP1	ENSG00000230989.2	0.00266682	0.000721122	0.0264036	0.00221882	0.00126359	0.812267
ENSG00000166016	ABTB2	ENSG00000166016.4	0.00698267	0.000734338	0.0265075	0.0118668	0.00517774	1.19654
ENSG00000102007	PLP2	ENSG00000102007.6	0.00106963	0.000753845	0.0270123	0.0103291	0.00693208	0.575354
ENSG00000103005	USB1	ENSG00000103005.7	0.00297876	0.000787545	0.0278706	0.00565724	0.00252341	1.16473
ENSG00000139211	AMIGO2	ENSG00000139211.5	0.00344563	0.000788868	0.0278706	0.00191511	0.00131434	0.54309
ENSG00000166562	SEC11C	ENSG00000166562.4	0.00356095	0.000792809	0.0279119	0.00728821	0.00203783	1.83853
ENSG00000136950	ARPC5L	ENSG00000136950.9	0.00317331	0.000795666	0.0279149	0.00583962	0.00314282	0.893818
ENSG00000114686	MRPL3	ENSG00000114686.4	0.00165977	0.000807371	0.0281374	0.00209398	0.00124409	0.751155
ENSG00000135940	COX5B	ENSG00000135940.2	0.00413424	0.000841805	0.0290279	0.0109756	0.00733306	0.581817
ENSG00000135966	TGFBRAP1	ENSG00000135966.8	0.00194819	0.000897888	0.0303746	0.00304044	0.00124893	1.28359
ENSG00000158019	BRE	ENSG00000158019.16	0.0021505	0.000943461	0.031456	0.00284634	0.00113939	1.32085
ENSG00000172738	TMEM217	ENSG00000172738.7	0.00868053	0.000948055	0.0315048	0.0290188	0.00539328	2.42776
ENSG00000152359	POC5	ENSG00000152359.10	0.00378132	0.000980071	0.0319773	0.0049688	0.00156186	1.66963
ENSG00000198522	GPN1	ENSG00000198522.9	0.00213078	0.000981329	0.0319773	0.00335731	0.00161351	1.0571
ENSG00000140950	TLDC1	ENSG00000140950.11	0.00202379	0.00104503	0.0338113	0.00457877	0.002568	0.834313
ENSG00000138190	EXOC6	ENSG00000138190.12	0.0029897	0.00105191	0.0338393	0.00372338	0.000411341	3.17821
ENSG00000054277	OPN3	ENSG00000054277.8	0.00228636	0.00105891	0.033956	0.00590431	0.00292288	1.01438
ENSG00000083312	TNPO1	ENSG00000083312.13	0.00417447	0.00106476	0.0339886	0.00127887	0.000843536	0.600344
ENSG00000154813	DPH3	ENSG00000154813.5	0.00512104	0.00106668	0.0339886	0.00174913	0.000301251	2.5376
ENSG00000135913	USP37	ENSG00000135913.6	0.00324858	0.00111945	0.0350254	0.00183163	0.000764407	1.26072
ENSG00000163661	PTX3	ENSG00000163661.3	0.0031658	0.00112705	0.0350254	0.00939682	0.00442806	1.0855
ENSG00000139289	PHLDA1	ENSG00000139289.9	0.000917474	0.00113085	0.0350261	0.00280961	0.00177761	0.660436
ENSG00000185721	DRG1	ENSG00000185721.7	0.00128638	0.00113403	0.0350261	0.00286727	0.00135956	1.07654
ENSG00000127580	WDR24	ENSG00000127580.11	0.0109873	0.00116989	0.0359135	0.00487516	0.00147898	1.72085
ENSG00000116649	SRM	ENSG00000116649.5	0.0105044	0.00118718	0.0363335	0.00423274	0.00235571	0.845427
ENSG00000133056	PIK3C2B	ENSG00000133056.9	0.00455577	0.00122873	0.0373604	0.0341714	0.00391258	3.1266
ENSG00000168575	SLC20A2	ENSG00000168575.5	0.00311941	0.00123336	0.0373604	0.00334898	0.00165959	1.01289
ENSG00000167962	ZNF598	ENSG00000167962.8	0.0106074	0.00123558	0.0373604	0.00319521	0.00135739	1.23507
ENSG00000182307	C8orf33	ENSG00000182307.8	0.00131757	0.0012551	0.0378015	0.00144617	0.000786288	0.879106
ENSG00000143702	CEP170	ENSG00000143702.11	0.00272839	0.00127411	0.0380683	0.00100217	0.000438435	1.19269
ENSG00000164163	ABCE1	ENSG00000164163.6	0.00317324	0.00133962	0.0392009	0.00106864	0.000564456	0.920837
ENSG00000105372	RPS19	ENSG00000105372.2	0.00410432	0.00134165	0.0392009	0.0021871	0.00147858	0.564809
ENSG00000242372	EIF6	ENSG00000242372.2	0.00371587	0.00139113	0.040367	0.00403915	0.0028469	0.504658
ENSG00000120533	ENY2	ENSG00000120533.8	0.00161967	0.00145481	0.0417335	0.0044667	0.00242937	0.878631
ENSG00000065183	WDR3	ENSG00000065183.11	0.00229591	0.00150543	0.0426924	0.00209186	0.00119045	0.813281
ENSG00000107036	RIC1	ENSG00000107036.7	0.00139992	0.00150815	0.0426924	0.00147294	0.000442794	1.73399
ENSG00000204256	BRD2	ENSG00000204256.8	0.00121595	0.00150944	0.0426924	0.00143756	0.000949058	0.599056
ENSG00000067334	DNTTIP2	ENSG00000067334.9	0.00332787	0.00154556	0.0431194	0.00165012	0.000876347	0.912999
ENSG00000066379	ZNRD1	ENSG00000066379.10	0.0022371	0.00155778	0.0432101	0.0063783	0.00250361	1.34916
ENSG00000163374	YY1AP1	ENSG00000163374.15	0.00185164	0.00158091	0.0437312	0.00219486	0.000737453	1.5735
ENSG00000123612	ACVR1C	ENSG00000123612.11	0.0186615	0.00170616	0.0465566	0.876305	0.484904	0.853734
ENSG00000168890	TMEM150A	ENSG00000168890.9	0.0057589	0.00173595	0.0469131	0.0060878	0.000784092	2.95683
ENSG00000089195	TRMT6	ENSG00000089195.10	0.00159464	0.00179804	0.0480224	0.00289912	0.00115126	1.33239
ENSG00000100647	SUSD6	ENSG00000100647.7	0.00267625	0.00184289	0.0489605	0.00318617	0.00064831	2.29707
ENSG00000034510	TMSB10	ENSG00000034510.4	0.0101975	0.00187651	0.0494622	0.0021527	0.00146782	0.552474
ENSG00000188643	S100A16	ENSG00000188643.6	0.00291519	0.00188421	0.0495356	0.0039587	0.00215851	0.874994
ENSG00000179431	FJX1	ENSG00000179431.5	0.0073751	0.00190176	0.0498668	0.00327844	0.00137635	1.25216
ENSG00000013306	SLC25A39	ENSG00000013306.11	0.00505676	0.00197057	0.0514034	0.00269439	0.00143683	0.907073
ENSG00000136810	TXN	ENSG00000136810.8	0.00753662	0.00199034	0.0517849	0.00631517	0.0043328	0.54352
ENSG00000115963	RND3	ENSG00000115963.9	0.00303014	0.00204161	0.0520967	0.00175922	0.000948323	0.891484
ENSG00000165527	ARF6	ENSG00000165527.5	0.00279296	0.00211204	0.0532987	0.00560811	0.00389027	0.527644
ENSG00000148303	RPL7A	ENSG00000148303.12	0.00162608	0.00212849	0.0534459	0.00167672	0.000993492	0.755063
ENSG00000139645	ANKRD52	ENSG00000139645.9	0.00381324	0.00215141	0.0537704	0.00212965	0.00125068	0.767903
ENSG00000161980	POLR3K	ENSG00000161980.5	0.00632025	0.00218635	0.054486	0.00843075	0.00354619	1.24939
ENSG00000213337	ANKRD39	ENSG00000213337.4	0.00656096	0.00219156	0.054486	0.00304039	0.000250727	3.60007
ENSG00000110031	LPXN	ENSG00000110031.8	0.00216886	0.00222505	0.0549119	0.00226656	0.00116784	0.956657
ENSG00000132694	ARHGEF11	ENSG00000132694.14	0.00192371	0.00223117	0.0549282	0.00136552	0.000404345	1.75579
ENSG00000122694	GLIPR2	ENSG00000122694.11	0.00283758	0.00228931	0.0558815	0.00561365	0.00177496	1.66115
ENSG00000198042	MAK16	ENSG00000198042.6	0.00313213	0.00229209	0.0558815	0.000870055	0.000222405	1.96792
ENSG00000128805	ARHGAP22	ENSG00000128805.10	0.00557019	0.00231517	0.0560904	0.00195299	0.000419826	2.21782
ENSG00000137216	TMEM63B	ENSG00000137216.14	0.00242626	0.00231737	0.0560904	0.00690281	0.00345715	0.997601
ENSG00000173915	USMG5	ENSG00000173915.8	0.00231497	0.00232575	0.0561582	0.00199683	0.000975103	1.03408
ENSG00000052749	RRP12	ENSG00000052749.9	0.0028299	0.00233152	0.0561628	0.00267824	0.00136796	0.96926
ENSG00000268750	ENSG00000268750	ENSG00000268750.2	0.00811325	0.00234198	0.0562802	0.00962234	0.00240977	1.99749
ENSG00000100142	POLR2F	ENSG00000100142.10	0.00343508	0.00237974	0.0569159	0.00462909	0.0024762	0.9026
ENSG00000094804	CDC6	ENSG00000094804.5	0.00182386	0.00239026	0.0570319	0.00202289	0.000917752	1.14024
ENSG00000138675	FGF5	ENSG00000138675.12	0.00516087	0.00242425	0.0577063	0.00284013	0.00105401	1.43008
ENSG00000183978	COA3	ENSG00000183978.7	0.00144867	0.00270772	0.0631788	0.00283808	0.000730504	1.95795
ENSG00000270299	ENSG00000270299	ENSG00000270299.1	0.00180056	0.00271067	0.0631788	0.00044016	9.05659e-05	2.28099
ENSG00000187231	SESTD1	ENSG00000187231.9	0.00184938	0.00276642	0.0638877	0.00332832	0.00100215	1.73169
ENSG00000148300	REXO4	ENSG00000148300.7	0.00300127	0.00286221	0.0656483	0.00188771	0.000663104	1.50933
ENSG00000134419	RPS15A	ENSG00000134419.11	0.00327413	0.0029203	0.0665261	0.00183787	0.00111585	0.719887
ENSG00000183579	ZNRF3	ENSG00000183579.11	0.00266588	0.00292709	0.0665302	0.00294238	0.00107728	1.4496
ENSG00000101773	RBBP8	ENSG00000101773.12	0.00427461	0.00295448	0.0670015	0.00139496	0.000537007	1.37721
ENSG00000001461	NIPAL3	ENSG00000001461.12	0.00150123	0.00299255	0.0675604	0.00193363	0.00106498	0.860479
ENSG00000174748	RPL15	ENSG00000174748.14	0.00136247	0.00309446	0.0685597	0.00101618	0.00062778	0.694819
ENSG00000148843	PDCD11	ENSG00000148843.9	0.00131704	0.00310992	0.0685597	0.00113018	0.000537994	1.07088
ENSG00000119812	FAM98A	ENSG00000119812.14	0.00234669	0.00311858	0.0685611	0.00301413	0.00154335	0.965679
ENSG00000179833	SERTAD2	ENSG00000179833.4	0.00401284	0.00314123	0.0687588	0.00208529	0.00131884	0.660979
ENSG00000161016	RPL8	ENSG00000161016.11	0.00962807	0.00321679	0.0699565	0.00452984	0.00317479	0.5128
ENSG00000106803	SEC61B	ENSG00000106803.5	0.00327906	0.00322987	0.0700896	0.00406193	0.00228272	0.831413
ENSG00000261459	ENSG00000261459	ENSG00000261459.1	0.021465	0.0032653	0.0706684	0.00373154	0.000551022	2.75959
ENSG00000151835	SACS	ENSG00000151835.9	0.00263666	0.0032776	0.0706684	0.00064743	0.000431009	0.587007
ENSG00000143653	SCCPDH	ENSG00000143653.9	0.0021299	0.00334041	0.0715629	0.00488785	0.00276836	0.820171
ENSG00000158526	TSR2	ENSG00000158526.7	0.00566876	0.00347126	0.0738945	0.00419103	0.00150828	1.47441
ENSG00000145220	LYAR	ENSG00000145220.9	0.00210328	0.00350742	0.0743499	0.0031557	0.00192984	0.709479
ENSG00000258289	CHURC1	ENSG00000258289.3	0.00220469	0.00361962	0.0763502	0.00379601	0.00226206	0.746848
ENSG00000178385	PLEKHM3	ENSG00000178385.9	0.00350529	0.00362873	0.0763502	0.00510162	0.00091928	2.47238
ENSG00000156650	KAT6B	ENSG00000156650.8	0.0026726	0.00363212	0.0763502	0.00220132	0.000612589	1.84538
ENSG00000122203	KIAA1191	ENSG00000122203.10	0.00180368	0.00366548	0.0765978	0.0010302	0.000433131	1.25005
ENSG00000269343	ZNF587B	ENSG00000269343.2	0.00165774	0.00367616	0.0765978	0.00192031	0.000573867	1.74256
ENSG00000113070	HBEGF	ENSG00000113070.6	0.00203892	0.00368954	0.0765978	0.00214298	0.000925057	1.21201
ENSG00000078668	VDAC3	ENSG00000078668.9	0.00222159	0.00372794	0.0770773	0.00330439	0.00211844	0.641379
ENSG00000188677	PARVB	ENSG00000188677.10	0.00261411	0.00374032	0.0771747	0.0028206	0.0014936	0.917204
ENSG00000182400	TRAPPC6B	ENSG00000182400.10	0.0035454	0.00380306	0.0776943	0.00207697	0.000810277	1.35799
ENSG00000153714	LURAP1L	ENSG00000153714.5	0.00253011	0.00380894	0.0776943	0.00442991	0.00164751	1.42699
ENSG00000267001	ENSG00000267001	ENSG00000267001.1	0.00455484	0.00381272	0.0776943	0.00877156	0.00176745	2.31117
ENSG00000123200	ZC3H13	ENSG00000123200.12	0.00315954	0.00392553	0.0793697	0.00297557	0.0014183	1.06901
ENSG00000105738	SIPA1L3	ENSG00000105738.6	0.00599694	0.00402262	0.0810076	0.00180275	0.000975367	0.886186
ENSG00000181264	TMEM136	ENSG00000181264.4	0.00420308	0.0040642	0.0813581	0.00347815	0.000439348	2.98489
ENSG00000083828	ZNF586	ENSG00000083828.11	0.0022064	0.00411093	0.0813581	0.00404832	0.00126977	1.67275
ENSG00000251493	FOXD1	ENSG00000251493.2	0.00356914	0.00412779	0.0814954	0.00172501	0.000902732	0.934233
ENSG00000112039	FANCE	ENSG00000112039.3	0.00606917	0.00416736	0.0819553	0.00298837	0.00106213	1.4924
ENSG00000135334	AKIRIN2	ENSG00000135334.8	0.00797575	0.00426882	0.082932	0.00932538	0.00504269	0.886969
ENSG00000167461	RAB8A	ENSG00000167461.7	0.00158495	0.00428291	0.082932	0.00459023	0.00286823	0.678408
ENSG00000169955	ZNF747	ENSG00000169955.6	0.0067426	0.00433738	0.0832416	0.00189457	0.000433593	2.12746
ENSG00000170425	ADORA2B	ENSG00000170425.3	0.00179176	0.00436487	0.0835549	0.00673875	0.00282794	1.25273
ENSG00000183010	PYCR1	ENSG00000183010.12	0.00715993	0.00458876	0.086324	0.00366462	0.00222618	0.719092
ENSG00000179388	EGR3	ENSG00000179388.8	0.104538	0.00464383	0.0864338	1.41834	0.452356	1.64867
ENSG00000067606	PRKCZ	ENSG00000067606.11	0.00273294	0.00464402	0.0864338	0.0496395	0.0177047	1.48735
ENSG00000154582	ELOC	ENSG00000154582.12	0.00164003	0.00469505	0.0865473	0.00280868	0.00159065	0.82028
ENSG00000139131	YARS2	ENSG00000139131.8	0.00130597	0.00470205	0.0865473	0.00808413	0.00395746	1.03052
ENSG00000134697	GNL2	ENSG00000134697.8	0.00141503	0.00471697	0.0865473	0.00232459	0.00131742	0.819265
ENSG00000272162	ENSG00000272162	ENSG00000272162.1	0.00708515	0.00472748	0.0865473	0.0073755	0.00172129	2.09926
ENSG00000157224	CLDN12	ENSG00000157224.11	0.00269908	0.00475157	0.0868304	0.00256321	0.00112571	1.18711
ENSG00000196781	TLE1	ENSG00000196781.9	0.0220261	0.00483108	0.0879641	0.0459599	0.0259462	0.824851
ENSG00000196497	IPO4	ENSG00000196497.11	0.00311558	0.00489282	0.0886075	0.0030887	0.00210416	0.553757
ENSG00000138018	SELENOI	ENSG00000138018.13	0.00423576	0.00491443	0.088708	0.00228184	0.00146748	0.636859
ENSG00000125945	ZNF436	ENSG00000125945.10	0.00231619	0.00491599	0.088708	0.00154452	0.000317569	2.28201
ENSG00000171155	C1GALT1C1	ENSG00000171155.7	0.00377031	0.00505751	0.0898196	0.0134726	0.00560919	1.26417
ENSG00000130766	SESN2	ENSG00000130766.4	0.00601905	0.00506898	0.0898196	0.00326951	0.00130359	1.32658
ENSG00000204084	INPP5B	ENSG00000204084.8	0.00118891	0.00507639	0.0898196	0.00204539	0.000779019	1.39265
ENSG00000134049	IER3IP1	ENSG00000134049.3	0.00437468	0.00507677	0.0898196	0.00707477	0.00397485	0.831783
ENSG00000128191	DGCR8	ENSG00000128191.9	0.00228237	0.0051104	0.0901167	0.00208788	0.00086894	1.26471
ENSG00000168389	MFSD2A	ENSG00000168389.13	0.0019938	0.00522321	0.0909904	0.00441409	0.001927	1.19576
ENSG00000128272	ATF4	ENSG00000128272.10	0.00166961	0.0052489	0.0912801	0.000660904	0.000403903	0.710431
ENSG00000103591	AAGAB	ENSG00000103591.8	0.00202637	0.00528829	0.0918032	0.00287119	0.00132624	1.1143
ENSG00000077713	SLC25A43	ENSG00000077713.14	0.00250313	0.0053179	0.0920034	0.00268897	0.000473308	2.5062
ENSG00000065911	MTHFD2	ENSG00000065911.7	0.00191556	0.00533064	0.0920655	0.0013083	0.000923824	0.501999
ENSG00000100522	GNPNAT1	ENSG00000100522.4	0.00339417	0.00540803	0.0930829	0.000656897	0.000202253	1.69951
ENSG00000100418	DESI1	ENSG00000100418.7	0.0021838	0.00546537	0.0935898	0.00275785	0.00126222	1.12758
ENSG00000131467	PSME3	ENSG00000131467.6	0.0013849	0.00556731	0.0948515	0.00290915	0.00201526	0.529633
ENSG00000086666	ZFAND6	ENSG00000086666.14	0.00292226	0.00561972	0.0951963	0.00252886	0.0012207	1.05077
ENSG00000081760	AACS	ENSG00000081760.12	0.00221799	0.00563568	0.0951963	0.00693019	0.00271691	1.35093
ENSG00000115687	PASK	ENSG00000115687.9	0.00567198	0.0056564	0.0951963	0.00319666	0.000661318	2.27315
ENSG00000249115	HAUS5	ENSG00000249115.4	0.00586991	0.00566486	0.0951963	0.00263566	0.000945167	1.47953
ENSG00000138867	GUCD1	ENSG00000138867.12	0.00319171	0.00567002	0.0951963	0.00155434	0.000751505	1.04845
ENSG00000171316	CHD7	ENSG00000171316.7	0.00147536	0.00567263	0.0951963	0.00140435	0.000632376	1.15105
ENSG00000196233	LCOR	ENSG00000196233.7	0.00347563	0.00571856	0.0954694	0.00223506	0.00103516	1.11046
ENSG00000240303	ACAD11	ENSG00000240303.3	0.00260167	0.00574545	0.0956214	0.00407017	0.00156494	1.37898
ENSG00000177542	SLC25A22	ENSG00000177542.6	0.00920531	0.00576663	0.0958154	0.00288491	0.00132308	1.12462
ENSG00000111641	NOP2	ENSG00000111641.6	0.00191853	0.00578452	0.0959545	0.00151432	0.000930142	0.703146
ENSG00000076924	XAB2	ENSG00000076924.7	0.00373276	0.00580367	0.095957	0.005333	0.00324477	0.716831
ENSG00000138944	KIAA1644	ENSG00000138944.7	0.0018249	0.00583873	0.095957	0.0113209	0.00463657	1.28786
ENSG00000144468	RHBDD1	ENSG00000144468.12	0.00266087	0.00602294	0.0971413	0.00292672	0.00113388	1.36801
ENSG00000125630	POLR1B	ENSG00000125630.11	0.00157058	0.00605762	0.0974347	0.00224289	0.00113253	0.985808
ENSG00000101365	IDH3B	ENSG00000101365.16	0.00230887	0.00607983	0.0976361	0.00572236	0.00305091	0.907371
ENSG00000158941	CCAR2	ENSG00000158941.12	0.00434181	0.00618116	0.0987269	0.00242376	0.00145833	0.732927
ENSG00000136738	STAM	ENSG00000136738.10	0.0039291	0.00626878	0.0995589	0.00454343	0.00210341	1.11105
ENSG00000140006	WDR89	ENSG00000140006.7	0.00515613	0.0063092	0.0997289	0.00211831	0.000801296	1.40251
ENSG00000007202	KIAA0100	ENSG00000007202.10	0.000713315	0.00638487	0.100452	0.00112599	0.000662525	0.765142
ENSG00000184162	NR2C2AP	ENSG00000184162.10	0.00294275	0.00655942	0.10224	0.00221389	0.000815198	1.44136
ENSG00000163900	TMEM41A	ENSG00000163900.6	0.00126989	0.00672426	0.104071	0.00369943	0.00144629	1.35494
ENSG00000185122	HSF1	ENSG00000185122.6	0.00597546	0.00677534	0.104071	0.00251507	0.0015626	0.686654
ENSG00000185238	PRMT3	ENSG00000185238.8	0.00318481	0.00680446	0.104071	0.0022617	0.00117494	0.94482
ENSG00000104442	ARMC1	ENSG00000104442.5	0.0034748	0.00684955	0.104071	0.00189351	0.00105012	0.850507
ENSG00000181472	ZBTB2	ENSG00000181472.4	0.00164284	0.00685202	0.104071	0.00104518	0.00039928	1.38827
ENSG00000182325	FBXL6	ENSG00000182325.6	0.0147998	0.00685261	0.104071	0.00668639	0.00341137	0.970878
ENSG00000141504	SAT2	ENSG00000141504.7	0.00267867	0.00695061	0.104483	0.00375029	0.000880306	2.09092
ENSG00000079277	MKNK1	ENSG00000079277.15	0.00143189	0.00699125	0.104483	0.00360742	0.00181158	0.993717
ENSG00000108825	PTGES3L-AARSD1	ENSG00000108825.13	0.00353807	0.00700246	0.104483	0.00433446	0.00195889	1.14582
ENSG00000172465	TCEAL1	ENSG00000172465.9	0.00190984	0.00700427	0.104483	0.00282395	0.000991694	1.50975
ENSG00000169905	TOR1AIP2	ENSG00000169905.8	0.00216416	0.00702399	0.104622	0.00196864	0.00122509	0.684315
ENSG00000270672	MTRNR2L6	ENSG00000270672.1	0.028286	0.00713359	0.105941	1.56309	0.723454	1.11143
ENSG00000155850	SLC26A2	ENSG00000155850.7	0.00153499	0.00715619	0.105964	0.00254126	0.00173253	0.552664
ENSG00000105193	RPS16	ENSG00000105193.4	0.0333238	0.00717955	0.106154	0.00659393	0.00360569	0.870864
ENSG00000069020	MAST4	ENSG00000069020.14	0.00216667	0.00721987	0.106448	0.00353402	0.000621459	2.50758
ENSG00000050748	MAPK9	ENSG00000050748.13	0.00245825	0.0072456	0.106448	0.00233296	0.00112973	1.04619
ENSG00000113460	BRIX1	ENSG00000113460.8	0.00288502	0.00734789	0.107382	0.00229632	0.00132879	0.789212
ENSG00000059758	CDK17	ENSG00000059758.3	0.0044232	0.0074059	0.107916	0.00163106	0.00057653	1.50034
ENSG00000143878	RHOB	ENSG00000143878.8	0.00343874	0.00745527	0.108322	0.0034185	0.00193562	0.820564
ENSG00000124380	SNRNP27	ENSG00000124380.6	0.00333884	0.00762125	0.110098	0.0027307	0.00142927	0.933996
ENSG00000243725	TTC4	ENSG00000243725.2	0.0013698	0.00768168	0.110617	0.0018483	0.000929616	0.991494
ENSG00000128654	MTX2	ENSG00000128654.9	0.00236782	0.00778446	0.111496	0.00479575	0.00228147	1.07179
ENSG00000144785	ENSG00000144785	ENSG00000144785.4	0.00330947	0.00781898	0.111534	0.0070349	0.00430059	0.709995
ENSG00000129055	ANAPC13	ENSG00000129055.8	0.00233172	0.00786688	0.112012	0.00176434	0.000942432	0.904664
ENSG00000103253	HAGHL	ENSG00000103253.13	0.0104288	0.00795327	0.112502	0.00355861	0.000519143	2.77711
ENSG00000241127	YAE1D1	ENSG00000241127.3	0.00498667	0.00795522	0.112502	0.00430044	0.00109432	1.97445
ENSG00000066629	EML1	ENSG00000066629.12	0.00204481	0.00799869	0.112708	0.00229204	0.000877105	1.38581
ENSG00000196177	ACADSB	ENSG00000196177.8	0.00265768	0.00806083	0.11279	0.00346678	0.00114061	1.60379
ENSG00000123908	AGO2	ENSG00000123908.7	0.00323524	0.00807096	0.11279	0.00206466	0.00126096	0.711374
ENSG00000118939	UCHL3	ENSG00000118939.13	0.00552858	0.00819095	0.113602	0.0052803	0.00308971	0.773148
ENSG00000204070	SYS1	ENSG00000204070.5	0.00129513	0.00826698	0.114195	0.00294218	0.00121227	1.27918
ENSG00000101255	TRIB3	ENSG00000101255.6	0.00533996	0.00827576	0.114195	0.00181047	0.000857515	1.07813
ENSG00000165996	HACD1	ENSG00000165996.9	0.00328341	0.00830838	0.114442	0.00844745	0.00419071	1.01132
ENSG00000157326	DHRS4	ENSG00000157326.14	0.00519569	0.00854151	0.116537	0.00739569	0.0016444	2.16912
ENSG00000160606	TLCD1	ENSG00000160606.6	0.00317463	0.00859851	0.117156	0.0103559	0.00369328	1.48748
ENSG00000185515	BRCC3	ENSG00000185515.10	0.0026058	0.00870081	0.118071	0.00169726	0.000891237	0.929326
ENSG00000001497	LAS1L	ENSG00000001497.12	0.00237216	0.00872026	0.118175	0.00451214	0.00308577	0.548185
ENSG00000163463	KRTCAP2	ENSG00000163463.7	0.00155187	0.00905286	0.12119	0.00959145	0.00653772	0.552962
ENSG00000119185	ITGB1BP1	ENSG00000119185.8	0.00113957	0.00916803	0.122269	0.0012685	0.000673268	0.913873
ENSG00000176444	CLK2	ENSG00000176444.14	0.00341593	0.00919344	0.122296	0.00272117	0.000746178	1.86663
ENSG00000101084	C20orf24	ENSG00000101084.12	0.0019789	0.00927095	0.123152	0.00329281	0.00225258	0.547738
ENSG00000185760	KCNQ5	ENSG00000185760.11	0.00314172	0.00934018	0.12342	0.00170498	0.000546436	1.64163
ENSG00000257727	CNPY2	ENSG00000257727.1	0.00186601	0.00959735	0.125014	0.00748802	0.00469964	0.672035
ENSG00000143740	SNAP47	ENSG00000143740.10	0.00342695	0.00961835	0.125126	0.00262361	0.00121293	1.11306
ENSG00000235162	C12orf75	ENSG00000235162.4	0.00327386	0.00965299	0.125253	0.00143214	0.000660937	1.11558
ENSG00000156304	SCAF4	ENSG00000156304.10	0.00626293	0.00975593	0.126101	0.0050319	0.00145879	1.78633
ENSG00000067082	KLF6	ENSG00000067082.10	0.00717425	0.00989035	0.126539	0.00296492	0.00195324	0.602126
ENSG00000129559	NEDD8	ENSG00000129559.8	0.00288956	0.0100702	0.128189	0.00135134	0.000732676	0.883143
ENSG00000128342	LIF	ENSG00000128342.4	0.00453524	0.0101221	0.128686	0.00122165	0.000522615	1.22501
ENSG00000109670	FBXW7	ENSG00000109670.9	0.00167414	0.0102447	0.129265	0.00140036	0.000292925	2.2572
ENSG00000139496	NUP58	ENSG00000139496.11	0.00277642	0.0103029	0.129837	0.00170639	0.00113864	0.58364
ENSG00000125148	MT2A	ENSG00000125148.6	0.0181394	0.0105264	0.131502	0.00282743	0.00180303	0.649071
ENSG00000167515	TRAPPC2L	ENSG00000167515.6	0.00198949	0.0105597	0.131571	0.00622013	0.00365191	0.768295
ENSG00000170577	SIX2	ENSG00000170577.7	0.00547804	0.0105842	0.131571	0.00608468	0.000646461	3.23455
ENSG00000198890	PRMT6	ENSG00000198890.6	0.00311904	0.010624	0.131903	0.00194773	0.000811474	1.26318
ENSG00000109436	TBC1D9	ENSG00000109436.7	0.00181624	0.0107905	0.132628	0.00246252	0.000879552	1.4853
ENSG00000186468	RPS23	ENSG00000186468.8	0.0173969	0.0108214	0.132717	0.0029284	0.00191295	0.614317
ENSG00000088930	XRN2	ENSG00000088930.6	0.001277	0.0111062	0.134799	0.00261711	0.00167755	0.641618
ENSG00000174840	PDE12	ENSG00000174840.8	0.00198421	0.011204	0.135395	0.00333051	0.00200955	0.728872
ENSG00000151135	TMEM263	ENSG00000151135.5	0.00343443	0.0112962	0.135795	0.00139365	0.000625579	1.15561
ENSG00000175768	TOMM5	ENSG00000175768.8	0.00192627	0.0113494	0.135968	0.00269074	0.00174911	0.621385
ENSG00000165271	NOL6	ENSG00000165271.12	0.00465888	0.01137	0.135968	0.00151581	0.00103983	0.543738
ENSG00000163138	PACRGL	ENSG00000163138.14	0.00361528	0.0114437	0.136443	0.00278709	0.000786053	1.82606
ENSG00000113638	TTC33	ENSG00000113638.8	0.00418266	0.0115961	0.137921	0.00281772	0.000707546	1.99363
ENSG00000146232	NFKBIE	ENSG00000146232.10	0.00478015	0.011896	0.13928	0.00371695	0.000875671	2.08566
ENSG00000126215	XRCC3	ENSG00000126215.9	0.00674155	0.0119162	0.13931	0.000990301	0.000479039	1.04772
ENSG00000185842	DNAH14	ENSG00000185842.10	0.00536631	0.0119262	0.13931	0.00130045	0.000348586	1.89943
ENSG00000080603	SRCAP	ENSG00000080603.12	0.00630623	0.0119685	0.139572	0.00296234	0.00183809	0.688533
ENSG00000157193	LRP8	ENSG00000157193.10	0.00116335	0.0119764	0.139572	0.00267648	0.00157455	0.7654
ENSG00000256591	ENSG00000256591	ENSG00000256591.1	0.00182519	0.0122036	0.141107	0.00517565	0.0023645	1.1302
ENSG00000107829	FBXW4	ENSG00000107829.9	0.00563115	0.0122062	0.141107	0.0038691	0.000878638	2.13866
ENSG00000132330	SCLY	ENSG00000132330.12	0.00261207	0.0123528	0.142475	0.00165945	0.000463162	1.84112
ENSG00000173933	RBM4	ENSG00000173933.15	0.0013748	0.012409	0.142633	0.00386868	0.00236552	0.709683
ENSG00000007520	TSR3	ENSG00000007520.3	0.0101064	0.012617	0.143225	0.0060629	0.00277544	1.12729
ENSG00000144635	DYNC1LI1	ENSG00000144635.4	0.00263899	0.0126727	0.143533	0.00241974	0.00136332	0.827732
ENSG00000164647	STEAP1	ENSG00000164647.4	0.00363331	0.012721	0.143693	0.00592995	0.00310229	0.934685
ENSG00000155438	NIFK	ENSG00000155438.7	0.00252999	0.0127349	0.143693	0.0015541	0.000793448	0.969868
ENSG00000037897	METTL1	ENSG00000037897.12	0.00607134	0.0127581	0.143693	0.00516166	0.00213305	1.27491
ENSG00000133639	BTG1	ENSG00000133639.3	0.00212554	0.0127999	0.144003	0.00595496	0.0038437	0.631595
ENSG00000179958	DCTPP1	ENSG00000179958.4	0.00404057	0.0130422	0.145604	0.00514797	0.00275287	0.903067
ENSG00000125817	CENPB	ENSG00000125817.7	0.00767996	0.0130488	0.145604	0.00178303	0.000890999	1.00083
ENSG00000266967	AARSD1	ENSG00000266967.2	0.00323069	0.0130551	0.145604	0.00367563	0.00181842	1.01531
ENSG00000150459	SAP18	ENSG00000150459.8	0.00185914	0.0130579	0.145604	0.0037012	0.00211877	0.804762
ENSG00000040487	PQLC2	ENSG00000040487.8	0.00375095	0.013181	0.14649	0.00630881	0.00298006	1.08202
ENSG00000166272	WBP1L	ENSG00000166272.12	0.00332439	0.0133265	0.147456	0.00193776	0.000856695	1.17754
ENSG00000107104	KANK1	ENSG00000107104.14	0.00268606	0.0134066	0.148016	0.00358626	0.00038755	3.21003
ENSG00000072134	EPN2	ENSG00000072134.11	0.0016277	0.0134778	0.148477	0.00237772	0.00131452	0.855039
ENSG00000231500	RPS18	ENSG00000231500.2	0.0512625	0.0136523	0.150235	0.00103217	0.000467344	1.14313
ENSG00000102898	NUTF2	ENSG00000102898.7	0.00181966	0.0137102	0.150409	0.00249553	0.00164136	0.604461
ENSG00000241343	RPL36A	ENSG00000241343.5	0.00130677	0.0138375	0.151353	0.00169128	0.000807525	1.06654
ENSG00000100395	L3MBTL2	ENSG00000100395.10	0.0020561	0.0138835	0.151619	0.00292966	0.00132823	1.14122
ENSG00000114744	COMMD2	ENSG00000114744.4	0.00275873	0.0139196	0.151849	0.00195446	0.000913992	1.09652
ENSG00000124104	SNX21	ENSG00000124104.14	0.00448694	0.0140386	0.152651	0.00386942	0.00129891	1.57482
ENSG00000217930	PAM16	ENSG00000217930.3	0.00660611	0.0140932	0.152848	0.00816736	0.00407582	1.00278
ENSG00000027697	IFNGR1	ENSG00000027697.8	0.00635058	0.0141069	0.152848	0.00982176	0.00546624	0.845434
ENSG00000196531	NACA	ENSG00000196531.6	0.00261696	0.0141675	0.152954	0.0011107	0.000737766	0.590239
ENSG00000226174	TEX22	ENSG00000226174.2	0.0023793	0.0142115	0.153044	0.0118196	0.00522254	1.17836
ENSG00000052723	SIKE1	ENSG00000052723.7	0.00376108	0.0142782	0.15327	0.00129433	0.000566538	1.19196
ENSG00000033867	SLC4A7	ENSG00000033867.12	0.00486598	0.0143996	0.153737	0.00349562	0.00229771	0.605351
ENSG00000160131	VMA21	ENSG00000160131.9	0.00325828	0.01466	0.155381	0.000896022	0.000363017	1.3035
ENSG00000087269	NOP14	ENSG00000087269.11	0.00127418	0.014847	0.156867	0.00213261	0.00144885	0.557714
ENSG00000184220	CMSS1	ENSG00000184220.6	0.00173404	0.0149751	0.158054	0.00225936	0.00122198	0.8867
ENSG00000112096	SOD2	ENSG00000112096.12	0.00125514	0.0150299	0.158467	0.00309728	0.00194277	0.672885
ENSG00000113732	ATP6V0E1	ENSG00000113732.4	0.00151582	0.0150679	0.158702	0.00401333	0.00273788	0.55174
ENSG00000102401	ARMCX3	ENSG00000102401.15	0.00135255	0.0152838	0.160164	0.0043705	0.00302953	0.528707
ENSG00000241468	ATP5J2	ENSG00000241468.3	0.00292817	0.0153828	0.160341	0.00198768	0.00105932	0.907943
ENSG00000163930	BAP1	ENSG00000163930.5	0.00224651	0.0154836	0.160731	0.0016884	0.000923237	0.870885
ENSG00000168175	MAPK1IP1L	ENSG00000168175.10	0.00132247	0.0156267	0.161112	0.00120722	0.000713235	0.759237
ENSG00000132676	DAP3	ENSG00000132676.11	0.00189099	0.0156488	0.161112	0.00289427	0.00199586	0.536187
ENSG00000112245	PTP4A1	ENSG00000112245.6	0.00614139	0.0156892	0.161112	0.00257534	0.00179322	0.522214
ENSG00000185164	NOMO2	ENSG00000185164.10	0.00210247	0.0156986	0.161112	0.00740717	0.00391038	0.921615
ENSG00000112685	EXOC2	ENSG00000112685.9	0.00174914	0.0157092	0.161112	0.00373817	0.00213489	0.80817
ENSG00000104497	SNX16	ENSG00000104497.9	0.00797126	0.0160402	0.162205	0.00212001	0.00081927	1.37166
ENSG00000182247	UBE2E2	ENSG00000182247.5	0.00146076	0.0160416	0.162205	0.00609025	0.00286237	1.08929
ENSG00000160908	ZNF394	ENSG00000160908.14	0.00215811	0.0160449	0.162205	0.00226531	0.000609754	1.89341
ENSG00000108091	CCDC6	ENSG00000108091.10	0.006294	0.0161158	0.162727	0.00154249	0.000744735	1.05046
ENSG00000105447	GRWD1	ENSG00000105447.8	0.00594141	0.0161631	0.162909	0.00296544	0.00185328	0.67817
ENSG00000149527	PLCH2	ENSG00000149527.13	0.00720761	0.0164186	0.164128	0.201919	0.0840314	1.26477
ENSG00000151532	VTI1A	ENSG00000151532.9	0.00250845	0.0164654	0.164128	0.00163337	0.000640847	1.3498
ENSG00000163659	TIPARP	ENSG00000163659.8	0.00341464	0.0165128	0.164295	0.00105953	0.000613918	0.787304
ENSG00000089916	GPATCH2L	ENSG00000089916.13	0.0019904	0.0165818	0.164574	0.00107896	0.0005009	1.10704
ENSG00000137103	TMEM8B	ENSG00000137103.12	0.0103087	0.0165898	0.164574	0.0058555	0.0015994	1.87226
ENSG00000108961	RANGRF	ENSG00000108961.9	0.00514461	0.0166257	0.164606	0.00426699	0.00113733	1.90757
ENSG00000115946	PNO1	ENSG00000115946.3	0.000992997	0.0167096	0.164662	0.00248119	0.00157512	0.655571
ENSG00000152382	TADA1	ENSG00000152382.5	0.00436251	0.0167328	0.164662	0.00355365	0.00103927	1.77374
ENSG00000079999	KEAP1	ENSG00000079999.9	0.00498954	0.0168265	0.165294	0.0031546	0.00187517	0.750433
ENSG00000157870	FAM213B	ENSG00000157870.10	0.00568835	0.0168837	0.165694	0.00630252	0.00329149	0.937187
ENSG00000126351	THRA	ENSG00000126351.8	0.00947626	0.0170148	0.166171	0.00270411	0.000848798	1.67166
ENSG00000188878	FBF1	ENSG00000188878.12	0.00535255	0.0170739	0.16635	0.00282119	0.000983792	1.51988
ENSG00000064393	HIPK2	ENSG00000064393.11	0.00223959	0.0171769	0.166462	0.000605086	0.000329358	0.877486
ENSG00000125434	SLC25A35	ENSG00000125434.6	0.00544687	0.0172017	0.166543	0.00524121	0.00177068	1.56559
ENSG00000270188	MTRNR2L11	ENSG00000270188.1	0.0714007	0.0174069	0.167999	270.472	51.5394	2.39173
ENSG00000174136	RGMB	ENSG00000174136.7	0.00163389	0.0174803	0.16843	0.00094582	0.000562044	0.750884
ENSG00000151470	C4orf33	ENSG00000151470.8	0.00210538	0.0176437	0.169154	0.00499778	0.00149439	1.74173
ENSG00000113851	CRBN	ENSG00000113851.9	0.004955	0.0176525	0.169154	0.00177171	0.000553961	1.67728
ENSG00000137204	SLC22A7	ENSG00000137204.10	0.00523974	0.0176605	0.169154	31.6981	4.79503	2.72479
ENSG00000115368	WDR75	ENSG00000115368.5	0.00328516	0.0177671	0.169568	0.0026712	0.00148481	0.847208
ENSG00000130066	SAT1	ENSG00000130066.12	0.00156624	0.017939	0.170403	0.0017608	0.000888974	0.98602
ENSG00000156140	ADAMTS3	ENSG00000156140.4	0.00420475	0.0180128	0.170934	0.00563316	0.0017931	1.65148
ENSG00000198856	OSTC	ENSG00000198856.8	0.0031948	0.0180288	0.170934	0.00389051	0.00261235	0.574608
ENSG00000105185	PDCD5	ENSG00000105185.7	0.0015548	0.018076	0.17122	0.00283843	0.00190367	0.576305
ENSG00000213516	RBMXL1	ENSG00000213516.5	0.00379554	0.018151	0.171692	0.0011732	0.00045463	1.36768
ENSG00000157654	PALM2-AKAP2	ENSG00000157654.13	0.00140627	0.0181599	0.171692	0.000854861	0.000543392	0.653696
ENSG00000198948	MFAP3L	ENSG00000198948.7	0.00409918	0.0182105	0.171947	0.00378087	0.000926592	2.02871
ENSG00000134070	IRAK2	ENSG00000134070.4	0.00284464	0.0183059	0.172172	0.00314466	0.00104768	1.5857
ENSG00000186501	TMEM222	ENSG00000186501.10	0.00700919	0.0183824	0.172339	0.0052709	0.00317932	0.729333
ENSG00000124659	TBCC	ENSG00000124659.5	0.00211699	0.0184171	0.172504	0.00433874	0.00228514	0.924995
ENSG00000185189	NRBP2	ENSG00000185189.11	0.00276421	0.0185615	0.172713	0.00266882	0.000702382	1.92587
ENSG00000204120	GIGYF2	ENSG00000204120.10	0.00122201	0.0186079	0.172713	0.00213043	0.00112845	0.916807
ENSG00000137133	HINT2	ENSG00000137133.6	0.00246023	0.0186901	0.173265	0.00704934	0.00321025	1.1348
ENSG00000185989	RASA3	ENSG00000185989.9	0.0043689	0.0188596	0.174217	0.00187648	0.000980213	0.936866
ENSG00000088832	FKBP1A	ENSG00000088832.10	0.00216597	0.0192611	0.177276	0.00152436	0.000830684	0.87583
ENSG00000165392	WRN	ENSG00000165392.5	0.00147059	0.0194356	0.178556	0.00243238	0.00116162	1.06623
ENSG00000158615	PPP1R15B	ENSG00000158615.8	0.00154273	0.0195851	0.178994	0.00199493	0.00128004	0.640153
ENSG00000153551	CMTM7	ENSG00000153551.9	0.00231684	0.0196426	0.179186	0.0039196	0.0017063	1.19983
ENSG00000117523	PRRC2C	ENSG00000117523.11	0.00235272	0.0197726	0.180009	0.00180232	0.00122855	0.552899
ENSG00000071082	RPL31	ENSG00000071082.6	0.00165234	0.0200506	0.181392	0.000793105	0.000495396	0.678929
ENSG00000105618	PRPF31	ENSG00000105618.9	0.00646731	0.0201419	0.181892	0.00390639	0.00264763	0.561134
ENSG00000271723	MROH7-TTC4	ENSG00000271723.1	0.00154297	0.0201786	0.181961	0.00171543	0.000840902	1.02856
ENSG00000083642	PDS5B	ENSG00000083642.14	0.00143523	0.0201858	0.181961	0.00248704	0.000923788	1.4288
ENSG00000105829	BET1	ENSG00000105829.7	0.00266208	0.0202078	0.181996	0.00331524	0.00127374	1.38004
ENSG00000157827	FMNL2	ENSG00000157827.15	0.00274943	0.0202461	0.182179	0.00179219	0.000918192	0.964855
ENSG00000112305	SMAP1	ENSG00000112305.10	0.00181636	0.0203673	0.182816	0.00227063	0.00131579	0.787161
ENSG00000173065	FAM222B	ENSG00000173065.9	0.00256491	0.0203847	0.182816	0.00623015	0.00255671	1.28498
ENSG00000137574	TGS1	ENSG00000137574.6	0.00159834	0.0205274	0.183247	0.00202769	0.00114134	0.829106
ENSG00000179021	C3orf38	ENSG00000179021.5	0.00155256	0.020655	0.183731	0.00358826	0.00189742	0.919247
ENSG00000225697	SLC26A6	ENSG00000225697.6	0.00384745	0.0206678	0.183731	0.00438981	0.0026169	0.746298
ENSG00000241978	AKAP2	ENSG00000241978.5	0.00134364	0.0207803	0.18435	0.000874403	0.000593074	0.560087
ENSG00000143398	PIP5K1A	ENSG00000143398.15	0.00122364	0.0208131	0.184478	0.00154291	0.000859932	0.843359
ENSG00000107130	NCS1	ENSG00000107130.6	0.00389896	0.0210619	0.185865	0.000954243	0.000342497	1.47826
ENSG00000213988	ZNF90	ENSG00000213988.5	0.0587584	0.0212744	0.186922	0.0121622	0.00511715	1.24899
ENSG00000163684	RPP14	ENSG00000163684.7	0.00238173	0.0213172	0.186922	0.00143561	0.000593531	1.27427
ENSG00000173064	HECTD4	ENSG00000173064.6	0.00324586	0.0213579	0.186922	0.00210417	0.00113295	0.893171
ENSG00000116679	IVNS1ABP	ENSG00000116679.11	0.00339817	0.0213827	0.186922	0.00219025	0.00138478	0.661438
ENSG00000137817	PARP6	ENSG00000137817.12	0.00205628	0.0224101	0.193357	0.00108512	0.000395625	1.45565
ENSG00000164897	TMUB1	ENSG00000164897.8	0.010442	0.0225683	0.193917	0.00374608	0.00181198	1.04781
ENSG00000248643	RBM14-RBM4	ENSG00000248643.5	0.00173712	0.0225713	0.193917	0.00415807	0.00260033	0.67722
ENSG00000198853	RUSC2	ENSG00000198853.7	0.00460412	0.0226554	0.194162	0.00145239	0.00077198	0.911793
ENSG00000218739	CEBPZOS	ENSG00000218739.5	0.00454075	0.02279	0.194633	0.0015757	0.000691078	1.18908
ENSG00000117305	HMGCL	ENSG00000117305.10	0.00167944	0.0228217	0.194739	0.00577585	0.00285889	1.01458
ENSG00000004455	AK2	ENSG00000004455.12	0.00135076	0.0229452	0.195461	0.000747361	0.000476188	0.650272
ENSG00000048162	NOP16	ENSG00000048162.15	0.00237685	0.0232118	0.196733	0.00456622	0.00307702	0.569465
ENSG00000122515	ZMIZ2	ENSG00000122515.10	0.00450475	0.0232858	0.196864	0.00536726	0.00313177	0.777208
ENSG00000109929	SC5D	ENSG00000109929.5	0.00237714	0.0233734	0.196975	0.00575623	0.00277104	1.0547
ENSG00000122482	ZNF644	ENSG00000122482.16	0.00414505	0.0234301	0.197256	0.000958164	0.000559525	0.776071
ENSG00000158156	XKR8	ENSG00000158156.7	0.00716253	0.0235942	0.198077	0.00830731	0.00272975	1.60561
ENSG00000183840	GPR39	ENSG00000183840.5	0.00269266	0.0236529	0.198077	0.00961838	0.00513237	0.906168
ENSG00000221887	HMSD	ENSG00000221887.4	0.00380799	0.0242386	0.200393	0.00805994	0.00122705	2.71558
ENSG00000256269	HMBS	ENSG00000256269.2	0.00442092	0.0244857	0.201756	0.0115305	0.005418	1.08962
ENSG00000113456	RAD1	ENSG00000113456.14	0.00178532	0.0248869	0.204439	0.00195405	0.00103367	0.918692
ENSG00000122550	KLHL7	ENSG00000122550.13	0.00462956	0.0249027	0.204439	0.00283025	0.00111185	1.34797
ENSG00000101654	RNMT	ENSG00000101654.13	0.0026631	0.024954	0.204444	0.00163642	0.000603077	1.44013
ENSG00000204356	NELFE	ENSG00000204356.7	0.00274494	0.0251214	0.205483	0.00295837	0.00185518	0.673245
ENSG00000086189	DIMT1	ENSG00000086189.5	0.0022553	0.0251773	0.205483	0.00259036	0.00133923	0.95175
ENSG00000146085	MUT	ENSG00000146085.7	0.00167478	0.0252735	0.205483	0.00542015	0.00334579	0.695987
ENSG00000126070	AGO3	ENSG00000126070.14	0.00145959	0.0253227	0.205483	0.00163525	0.000770329	1.08597
ENSG00000139116	KIF21A	ENSG00000139116.13	0.00290311	0.0253751	0.205483	0.00179753	0.000836978	1.10276
ENSG00000127914	AKAP9	ENSG00000127914.12	0.0032354	0.0254432	0.205773	0.00260119	0.00159395	0.706565
ENSG00000121350	PYROXD1	ENSG00000121350.11	0.00543952	0.0255569	0.205866	0.000893821	0.000384773	1.21598
ENSG00000154319	FAM167A	ENSG00000154319.10	0.00200536	0.0258442	0.207351	0.000977584	0.000363341	1.4279
ENSG00000181649	PHLDA2	ENSG00000181649.5	0.018709	0.0259521	0.20739	0.0123642	0.00739768	0.741029
ENSG00000198841	KTI12	ENSG00000198841.3	0.00293573	0.0260376	0.207744	0.00371777	0.00195786	0.925158
ENSG00000100288	CHKB	ENSG00000100288.15	0.00254867	0.0260759	0.207885	0.00213268	0.000513144	2.05523
ENSG00000204335	SP5	ENSG00000204335.3	0.0120213	0.0264341	0.209744	0.0953717	0.0276824	1.78459
ENSG00000163002	NUP35	ENSG00000163002.8	0.00361342	0.0264821	0.209959	0.00295589	0.00121399	1.28383
ENSG00000116212	LRRC42	ENSG00000116212.10	0.00208196	0.0266011	0.210172	0.00681498	0.00431377	0.65976
ENSG00000167842	MIS12	ENSG00000167842.11	0.00585739	0.0266504	0.210172	0.00348463	0.00141514	1.30006
ENSG00000100580	TMED8	ENSG00000100580.7	0.00116017	0.0266887	0.210172	0.000841199	0.000322766	1.38196
ENSG00000164284	GRPEL2	ENSG00000164284.10	0.0040751	0.0267953	0.210172	0.00159524	0.000939717	0.763475
ENSG00000135919	SERPINE2	ENSG00000135919.8	0.00293404	0.0269677	0.210767	0.00781894	0.0052808	0.566217
ENSG00000104979	C19orf53	ENSG00000104979.4	0.00585458	0.0269818	0.210767	0.00385738	0.00206853	0.899014
ENSG00000161813	LARP4	ENSG00000161813.16	0.00319979	0.027035	0.210767	0.00133535	0.000783528	0.769165
ENSG00000164306	PRIMPOL	ENSG00000164306.6	0.00366238	0.0270686	0.210767	0.0026652	0.000763546	1.80346
ENSG00000167378	IRGQ	ENSG00000167378.4	0.00162512	0.0271162	0.210767	0.00128653	0.000585005	1.13697
ENSG00000134086	VHL	ENSG00000134086.7	0.00145534	0.0271279	0.210767	0.00222189	0.00107282	1.05038
ENSG00000112306	RPS12	ENSG00000112306.7	0.0375448	0.0271492	0.210767	0.00123514	0.000699541	0.820193
ENSG00000198258	UBL5	ENSG00000198258.6	0.000935642	0.0273636	0.211778	0.00573243	0.00380194	0.592412
ENSG00000100908	EMC9	ENSG00000100908.9	0.00210617	0.0274132	0.212	0.0131343	0.00642291	1.03204
ENSG00000070785	EIF2B3	ENSG00000070785.12	0.00183026	0.027462	0.212091	0.00370524	0.00221789	0.740377
ENSG00000142686	C1orf216	ENSG00000142686.7	0.00121098	0.0274671	0.212091	0.002077	0.000795795	1.38403
ENSG00000172009	THOP1	ENSG00000172009.10	0.00829068	0.0275352	0.212453	0.0035767	0.00238419	0.58513
ENSG00000110721	CHKA	ENSG00000110721.7	0.001871	0.0275886	0.212553	0.00263679	0.000752254	1.80949
ENSG00000106012	IQCE	ENSG00000106012.13	0.00358434	0.0275903	0.212553	0.00227467	0.000671405	1.7604
ENSG00000170448	NFXL1	ENSG00000170448.7	0.00430808	0.0277285	0.212875	0.00289789	0.00123118	1.23496
ENSG00000153157	SYCP2L	ENSG00000153157.8	0.00622568	0.0277744	0.212875	0.00689836	0.00281237	1.29447
ENSG00000115816	CEBPZ	ENSG00000115816.9	0.00320676	0.0278994	0.213141	0.00154653	0.00092675	0.73878
ENSG00000229117	RPL41	ENSG00000229117.4	0.00285858	0.0281284	0.214402	0.00460581	0.00298744	0.624543
ENSG00000173757	STAT5B	ENSG00000173757.5	0.00144208	0.0282183	0.214714	0.00198416	0.000704186	1.4945
ENSG00000185115	NSMCE3	ENSG00000185115.4	0.00358076	0.0282333	0.214714	0.0034254	0.00176532	0.95634
ENSG00000237190	CDKN2AIPNL	ENSG00000237190.3	0.00340072	0.0284092	0.215752	0.00272434	0.00138222	0.978914
ENSG00000100036	SLC35E4	ENSG00000100036.11	0.00628071	0.028434	0.215752	0.0062113	0.00219073	1.50349
ENSG00000107816	LZTS2	ENSG00000107816.13	0.00785201	0.0284994	0.216085	0.00269837	0.00145035	0.895689
ENSG00000163348	PYGO2	ENSG00000163348.3	0.00298769	0.028937	0.2184	0.0012013	0.000590782	1.0239
ENSG00000115317	HTRA2	ENSG00000115317.7	0.00393756	0.0290131	0.218662	0.00364405	0.00254356	0.518694
ENSG00000120616	EPC1	ENSG00000120616.11	0.00328458	0.0290678	0.218759	0.00310016	0.000921424	1.75041
ENSG00000109536	FRG1	ENSG00000109536.7	0.00268653	0.0291201	0.218759	0.00241074	0.000997905	1.2725
ENSG00000126953	TIMM8A	ENSG00000126953.5	0.00332352	0.0292064	0.218759	0.00168485	0.00083703	1.00927
ENSG00000117616	RSRP1	ENSG00000117616.13	0.0378144	0.0292122	0.218759	0.0441117	0.0264478	0.738015
ENSG00000116096	SPR	ENSG00000116096.5	0.00395296	0.0292246	0.218759	0.00330678	0.000928231	1.83287
ENSG00000095209	TMEM38B	ENSG00000095209.7	0.00470441	0.029252	0.218759	0.00600602	0.00413211	0.539529
ENSG00000271303	SRXN1	ENSG00000271303.1	0.00166102	0.0292613	0.218759	0.000734511	0.000360172	1.0281
ENSG00000156504	FAM122B	ENSG00000156504.12	0.0040343	0.0294396	0.219621	0.00521178	0.00238968	1.12496
ENSG00000172795	DCP2	ENSG00000172795.11	0.00333385	0.0294457	0.219621	0.000880922	0.000492788	0.838047
ENSG00000158516	CPA2	ENSG00000158516.7	0.00698368	0.0295405	0.220002	0.406634	0.0819495	2.31093
ENSG00000119522	DENND1A	ENSG00000119522.11	0.00203106	0.0296091	0.22035	0.00136469	0.000525656	1.37638
ENSG00000141873	SLC39A3	ENSG00000141873.6	0.00818106	0.0296963	0.220775	0.00687061	0.00415312	0.726242
ENSG00000166166	TRMT61A	ENSG00000166166.8	0.0109939	0.0299131	0.22098	0.00289565	0.00161487	0.842468
ENSG00000139318	DUSP6	ENSG00000139318.7	0.00154638	0.0300483	0.221491	0.0029661	0.00169333	0.808706
ENSG00000149932	TMEM219	ENSG00000149932.12	0.00383892	0.0302189	0.222098	0.00356965	0.00198161	0.849111
ENSG00000156232	WHAMM	ENSG00000156232.6	0.00400301	0.0303107	0.222601	0.00338762	0.000602681	2.49081
ENSG00000168917	SLC35G2	ENSG00000168917.8	0.00157384	0.0303634	0.222672	0.00709889	0.00467134	0.603756
ENSG00000198369	SPRED2	ENSG00000198369.5	0.00326585	0.0304446	0.223105	0.00119343	0.00037559	1.66788
ENSG00000085276	MECOM	ENSG00000085276.13	0.00223447	0.0307626	0.225108	0.00137628	0.000725493	0.923739
ENSG00000083223	ZCCHC6	ENSG00000083223.13	0.00165487	0.0307855	0.225112	0.00200131	0.0011821	0.759595
ENSG00000111358	GTF2H3	ENSG00000111358.9	0.00319359	0.0308227	0.225221	0.00256824	0.00170964	0.587087
ENSG00000165138	ANKS6	ENSG00000165138.12	0.00327466	0.0309562	0.225662	0.00132798	0.000276963	2.26147
ENSG00000142252	GEMIN7	ENSG00000142252.6	0.00457297	0.0311472	0.226187	0.003633	0.00129756	1.48536
ENSG00000141385	AFG3L2	ENSG00000141385.5	0.00144266	0.0313	0.227061	0.00222197	0.0013086	0.763814
ENSG00000257315	ZBED6	ENSG00000257315.1	0.00115908	0.0313469	0.227195	0.000975681	0.000410534	1.24891
ENSG00000167904	TMEM68	ENSG00000167904.10	0.00283783	0.0319189	0.229565	0.00312577	0.0017993	0.796781
ENSG00000012983	MAP4K5	ENSG00000012983.7	0.00297981	0.0319484	0.229614	0.00122678	0.000729645	0.749606
ENSG00000174953	DHX36	ENSG00000174953.9	0.00399854	0.0321089	0.230238	0.00211201	0.00137875	0.615254
ENSG00000118655	DCLRE1B	ENSG00000118655.4	0.00121821	0.0322573	0.230841	0.00187944	0.000889192	1.07974
ENSG00000100413	POLR3H	ENSG00000100413.12	0.00337269	0.0322796	0.230841	0.00184139	0.00101291	0.862286
ENSG00000100029	PES1	ENSG00000100029.13	0.00384523	0.0323315	0.231002	0.00243345	0.00163674	0.572176
ENSG00000214046	SMIM7	ENSG00000214046.4	0.00123202	0.0325923	0.23203	0.00387126	0.00233623	0.728621
ENSG00000107669	ATE1	ENSG00000107669.13	0.00204055	0.0326072	0.23203	0.00214903	0.00108911	0.980536
ENSG00000107771	CCSER2	ENSG00000107771.11	0.00213551	0.0326442	0.232097	0.0010755	0.000530685	1.01908
ENSG00000182952	HMGN4	ENSG00000182952.4	0.00339859	0.0329981	0.233149	0.00212185	0.00124042	0.774492
ENSG00000188026	RILPL1	ENSG00000188026.7	0.00430947	0.0332511	0.23364	0.00615379	0.00296938	1.05131
ENSG00000105514	RAB3D	ENSG00000105514.3	0.00491797	0.0333335	0.234055	0.00681359	0.00255116	1.41726
ENSG00000115363	EVA1A	ENSG00000115363.9	0.00192708	0.0333601	0.234079	0.00267363	0.00175595	0.606548
ENSG00000137124	ALDH1B1	ENSG00000137124.6	0.00259003	0.0341384	0.237588	0.00435634	0.00277063	0.652904
ENSG00000162734	PEA15	ENSG00000162734.8	0.00166287	0.034153	0.237588	0.00114086	0.000787437	0.534886
ENSG00000160200	CBS	ENSG00000160200.13	0.00328424	0.0341755	0.237588	0.00280505	0.00134046	1.0653
ENSG00000148337	CIZ1	ENSG00000148337.15	0.00371352	0.0341906	0.237588	0.00222583	0.00144145	0.626825
ENSG00000177425	PAWR	ENSG00000177425.6	0.00277973	0.0342691	0.2376	0.000950232	0.000603398	0.655169
ENSG00000088387	DOCK9	ENSG00000088387.13	0.00190979	0.0342867	0.2376	0.00161309	0.000871934	0.887539
ENSG00000205542	TMSB4X	ENSG00000205542.6	0.00214881	0.0344215	0.238028	0.000729898	0.000336184	1.11844
ENSG00000153130	SCOC	ENSG00000153130.13	0.00359151	0.0345528	0.238028	0.00099284	0.000570713	0.798796
ENSG00000130810	PPAN	ENSG00000130810.15	0.00573979	0.0345848	0.238028	0.00410402	0.00244764	0.745648
ENSG00000110697	PITPNM1	ENSG00000110697.8	0.00954443	0.0348914	0.239553	0.00177374	0.000639847	1.471
ENSG00000188958	UTS2B	ENSG00000188958.5	0.0107519	0.0350028	0.239609	0.0256983	0.00953354	1.43059
ENSG00000130348	QRSL1	ENSG00000130348.7	0.00269691	0.0350049	0.239609	0.00202793	0.00114628	0.82305
ENSG00000177034	MTX3	ENSG00000177034.10	0.00408135	0.0352053	0.240419	0.000876951	0.000343713	1.35129
ENSG00000130958	SLC35D2	ENSG00000130958.7	0.00245817	0.0352889	0.240571	0.00327992	0.00148195	1.14616
ENSG00000106080	FKBP14	ENSG00000106080.6	0.00169144	0.0354931	0.241147	0.00347123	0.00202407	0.778186
ENSG00000160284	SPATC1L	ENSG00000160284.10	0.0073205	0.0357319	0.242127	0.0090617	0.00438944	1.04574
ENSG00000203668	CHML	ENSG00000203668.1	0.00320087	0.0361476	0.244112	0.000491619	0.000235392	1.06247
ENSG00000166887	VPS39	ENSG00000166887.11	0.00201296	0.0361741	0.244127	0.0040018	0.00163036	1.29546
ENSG00000168137	SETD5	ENSG00000168137.11	0.00200745	0.0362276	0.244324	0.00140105	0.000868536	0.68985
ENSG00000145293	ENOPH1	ENSG00000145293.10	0.0017542	0.0362594	0.244345	0.00232793	0.001365	0.770149
ENSG00000177548	RABEP2	ENSG00000177548.8	0.00923234	0.0363035	0.244345	0.00295304	0.000915418	1.6897
ENSG00000197622	CDC42SE1	ENSG00000197622.8	0.00145524	0.0364325	0.244559	0.00113978	0.000571568	0.995756
ENSG00000258984	UBE2F-SCLY	ENSG00000258984.1	0.00210106	0.0364941	0.244647	0.00185603	0.000937888	0.984734
ENSG00000125149	C16orf70	ENSG00000125149.7	0.00164881	0.0365828	0.245078	0.00270436	0.00145541	0.893867
ENSG00000155099	TMEM55A	ENSG00000155099.3	0.0017229	0.036675	0.245495	0.00276919	0.00150561	0.879119
ENSG00000144840	RABL3	ENSG00000144840.4	0.00188406	0.036793	0.24585	0.00347989	0.00165958	1.06822
ENSG00000164151	ICE1	ENSG00000164151.7	0.00176919	0.03686	0.24585	0.00113338	0.000608467	0.897385
ENSG00000114125	RNF7	ENSG00000114125.9	0.0021939	0.0368968	0.24585	0.0019706	0.00120933	0.704429
ENSG00000174547	MRPL11	ENSG00000174547.9	0.00343991	0.0369008	0.24585	0.00403064	0.00211305	0.931685
ENSG00000178980	SELENOW	ENSG00000178980.10	0.00435483	0.0369776	0.246086	0.00199589	0.00117937	0.759024
ENSG00000197136	PCNX3	ENSG00000197136.4	0.00909313	0.0371947	0.24704	0.00310131	0.00177146	0.807936
ENSG00000173540	GMPPB	ENSG00000173540.8	0.00395827	0.0372476	0.247229	0.00371154	0.00242208	0.615768
ENSG00000041802	LSG1	ENSG00000041802.6	0.00130454	0.0374652	0.248151	0.00230253	0.00147225	0.645197
ENSG00000160949	TONSL	ENSG00000160949.12	0.00944205	0.0375098	0.248151	0.00209677	0.00108057	0.956377
ENSG00000198858	R3HDM4	ENSG00000198858.5	0.00652887	0.0379278	0.249604	0.00409502	0.00229686	0.834206
ENSG00000141198	TOM1L1	ENSG00000141198.9	0.00275124	0.0380353	0.250149	0.00193731	0.000829054	1.22451
ENSG00000106603	COA1	ENSG00000106603.13	0.00105778	0.0382755	0.250354	0.00234142	0.00134249	0.802468
ENSG00000148175	STOM	ENSG00000148175.8	0.00201259	0.0383649	0.250354	0.00437752	0.00294259	0.573027
ENSG00000189067	LITAF	ENSG00000189067.8	0.00176404	0.0383955	0.250392	0.00391801	0.00235818	0.732448
ENSG00000182150	ERCC6L2	ENSG00000182150.11	0.00188883	0.038459	0.25045	0.0017909	0.00103253	0.794498
ENSG00000176422	SPRYD4	ENSG00000176422.10	0.00314643	0.0384786	0.25045	0.00531607	0.00213958	1.31303
ENSG00000011243	AKAP8L	ENSG00000011243.13	0.00306964	0.0385271	0.25045	0.00317961	0.00211308	0.589507
ENSG00000023572	GLRX2	ENSG00000023572.4	0.00271095	0.038618	0.25045	0.00546401	0.00301411	0.858228
ENSG00000128283	CDC42EP1	ENSG00000128283.6	0.00986619	0.0386306	0.25045	0.00254948	0.00149439	0.770641
ENSG00000173848	NET1	ENSG00000173848.14	0.00189449	0.0388033	0.251099	0.00176205	0.000786825	1.16314
ENSG00000108733	PEX12	ENSG00000108733.5	0.00297388	0.0391252	0.252533	0.00425362	0.00151951	1.48509
ENSG00000267228	ENSG00000267228	ENSG00000267228.2	0.00351712	0.0401823	0.256943	0.0159433	0.0104256	0.612818
ENSG00000149532	CPSF7	ENSG00000149532.11	0.00131046	0.0402182	0.256943	0.00218295	0.0013053	0.741895
ENSG00000160194	NDUFV3	ENSG00000160194.13	0.00127971	0.0402422	0.256943	0.00216591	0.00115242	0.910304
ENSG00000174109	C16orf91	ENSG00000174109.3	0.00439717	0.0402918	0.257085	0.00477245	0.00186846	1.35288
ENSG00000196072	BLOC1S2	ENSG00000196072.7	0.00389866	0.0403694	0.257266	0.00128593	0.000346375	1.8924
ENSG00000129680	MAP7D3	ENSG00000129680.11	0.0023454	0.0407387	0.258311	0.00169704	0.000809723	1.06752
ENSG00000068001	HYAL2	ENSG00000068001.9	0.00684848	0.0409712	0.25928	0.00670321	0.00388874	0.785551
ENSG00000129667	RHBDF2	ENSG00000129667.8	0.00836255	0.0409801	0.25928	0.00581656	0.00337289	0.78618
ENSG00000125703	ATG4C	ENSG00000125703.10	0.00467889	0.0410106	0.25928	0.00309428	0.00140528	1.13875
ENSG00000140157	NIPA2	ENSG00000140157.10	0.00212396	0.0410203	0.25928	0.00313155	0.00201985	0.632626
ENSG00000162194	LBHD1	ENSG00000162194.8	0.00323269	0.0411967	0.259887	0.00336157	0.00205952	0.706825
ENSG00000188290	HES4	ENSG00000188290.6	0.0318707	0.0413288	0.260413	0.0106508	0.00180887	2.5578
ENSG00000149357	LAMTOR1	ENSG00000149357.5	0.00662719	0.0414422	0.260822	0.00289947	0.00195159	0.57114
ENSG00000026103	FAS	ENSG00000026103.15	0.00630396	0.0414514	0.260822	0.0169228	0.00475267	1.83216
ENSG00000137547	MRPL15	ENSG00000137547.4	0.00110468	0.0415492	0.260822	0.00331471	0.00228529	0.536506
ENSG00000119977	TCTN3	ENSG00000119977.16	0.0015846	0.0417105	0.261649	0.00423368	0.00268719	0.655816
ENSG00000128607	KLHDC10	ENSG00000128607.9	0.00153032	0.0419915	0.262467	0.00160134	0.000836299	0.937191
ENSG00000197608	ZNF841	ENSG00000197608.7	0.00171994	0.0419937	0.262467	0.00124046	0.000141213	3.13493
ENSG00000164949	GEM	ENSG00000164949.3	0.0024228	0.0422852	0.264125	0.00293464	0.00107269	1.45194
ENSG00000137338	PGBD1	ENSG00000137338.4	0.0014709	0.0424234	0.264769	0.00298319	0.0015036	0.988434
ENSG00000104897	SF3A2	ENSG00000104897.5	0.014327	0.0424409	0.264769	0.00633879	0.00360689	0.813451
ENSG00000120709	FAM53C	ENSG00000120709.6	0.00225372	0.0424979	0.264857	0.00101178	0.000543135	0.897517
ENSG00000102225	CDK16	ENSG00000102225.11	0.00305107	0.0425525	0.264973	0.00123853	0.00082926	0.578732
ENSG00000156170	NDUFAF6	ENSG00000156170.8	0.00274236	0.0426662	0.265193	0.00198262	0.000972451	1.02771
ENSG00000112309	B3GAT2	ENSG00000112309.6	0.00207128	0.0428208	0.265658	0.000946456	0.000447786	1.07973
ENSG00000101199	ARFGAP1	ENSG00000101199.8	0.00706372	0.0429907	0.266384	0.00198027	0.00123776	0.677965
ENSG00000166133	RPUSD2	ENSG00000166133.13	0.00698572	0.0434538	0.268098	0.00298706	0.00105025	1.508
ENSG00000142684	ZNF593	ENSG00000142684.7	0.00430446	0.0436009	0.268841	0.00343886	0.00186983	0.879021
ENSG00000189369	GSPT2	ENSG00000189369.7	0.00269428	0.0436356	0.26889	0.00569561	0.0014638	1.96013
ENSG00000171863	RPS7	ENSG00000171863.8	0.00323119	0.0436674	0.268922	0.0007579	0.000372489	1.02481
ENSG00000144655	CSRNP1	ENSG00000144655.10	0.00404756	0.0437143	0.268944	0.00198198	0.000774348	1.35589
ENSG00000167523	SPATA33	ENSG00000167523.9	0.00451094	0.043968	0.26944	0.00451053	0.00209834	1.10405
ENSG00000111877	MCM9	ENSG00000111877.13	0.00117499	0.0439747	0.26944	0.00305344	0.00162167	0.912952
ENSG00000103426	CORO7-PAM16	ENSG00000103426.8	0.00613237	0.0440592	0.269685	0.00644818	0.00393512	0.712485
ENSG00000115649	CNPPD1	ENSG00000115649.11	0.00236592	0.0442304	0.270569	0.00611686	0.00425793	0.522637
ENSG00000118961	LDAH	ENSG00000118961.10	0.00313484	0.0447408	0.272367	0.00119378	0.000523072	1.19045
ENSG00000136827	TOR1A	ENSG00000136827.11	0.00159457	0.0451636	0.274517	0.00511278	0.00353534	0.532257
ENSG00000131323	TRAF3	ENSG00000131323.10	0.00108286	0.0452719	0.274677	0.000692647	0.000270107	1.35859
ENSG00000008869	HEATR5B	ENSG00000008869.7	0.00215236	0.0452839	0.274677	0.00248006	0.00111608	1.15194
ENSG00000172331	BPGM	ENSG00000172331.7	0.00509416	0.0455522	0.27564	0.00202024	0.000515416	1.97072
ENSG00000102781	KATNAL1	ENSG00000102781.9	0.00178625	0.0462458	0.278665	0.00111577	0.000570379	0.968041
ENSG00000132849	PATJ	ENSG00000132849.14	0.00234893	0.0463418	0.278827	0.00289694	0.000361858	3.00103
ENSG00000135823	STX6	ENSG00000135823.9	0.00160094	0.0466656	0.279635	0.0025947	0.00152923	0.762765
ENSG00000247626	MARS2	ENSG00000247626.3	0.00352658	0.0466995	0.279635	0.00392033	0.00150112	1.38494
ENSG00000110931	CAMKK2	ENSG00000110931.14	0.00323928	0.04675	0.279695	0.00200522	0.000739839	1.43848
ENSG00000187118	CMC1	ENSG00000187118.8	0.00465176	0.0468947	0.27993	0.00199978	0.00114678	0.802253
ENSG00000143190	POU2F1	ENSG00000143190.17	0.00216714	0.0469741	0.27993	0.00134423	0.000677537	0.98841
ENSG00000176020	AMIGO3	ENSG00000176020.7	0.00377192	0.0469924	0.27993	0.00370299	0.00246922	0.584638
ENSG00000164654	MIOS	ENSG00000164654.11	0.00221497	0.047011	0.27993	0.00232162	0.000932239	1.31636
ENSG00000058866	DGKG	ENSG00000058866.10	0.00293787	0.047032	0.27993	0.00633291	0.00223456	1.50287
ENSG00000151353	TMEM18	ENSG00000151353.10	0.00236283	0.047099	0.279953	0.00438752	0.00287389	0.6104
ENSG00000143162	CREG1	ENSG00000143162.7	0.0014659	0.0473463	0.280467	0.00708234	0.00445998	0.667189
ENSG00000137478	FCHSD2	ENSG00000137478.10	0.00234433	0.0474309	0.280467	0.00225269	0.000736919	1.61207
ENSG00000119559	C19orf25	ENSG00000119559.11	0.0086097	0.0478778	0.282174	0.00199397	0.000765756	1.38069
ENSG00000103855	CD276	ENSG00000103855.13	0.00521161	0.0479166	0.282174	0.00425989	0.00174205	1.29003
ENSG00000163812	ZDHHC3	ENSG00000163812.9	0.00105515	0.0480281	0.282639	0.0018363	0.0011967	0.617744
ENSG00000164404	GDF9	ENSG00000164404.4	0.0102378	0.0482037	0.283175	0.00456098	0.00170684	1.41802
ENSG00000100938	GMPR2	ENSG00000100938.13	0.00138095	0.0484736	0.284263	0.00411214	0.00238977	0.783018
ENSG00000180389	ATP5EP2	ENSG00000180389.6	0.00800665	0.0487514	0.285063	0.00435164	0.00154314	1.49569
ENSG00000112242	E2F3	ENSG00000112242.10	0.00211387	0.0490136	0.285761	0.00103243	0.000404478	1.35192
ENSG00000197958	RPL12	ENSG00000197958.8	0.00384298	0.0493502	0.286898	0.000795668	0.000520288	0.612858
ENSG00000205250	E2F4	ENSG00000205250.4	0.00298649	0.0494574	0.28719	0.00108814	0.000663169	0.71442
ENSG00000092978	GPATCH2	ENSG00000092978.6	0.00301443	0.0495238	0.28741	0.0013254	0.000658804	1.00851
ENSG00000170915	PAQR8	ENSG00000170915.8	0.00220794	0.0498873	0.288541	0.00960513	0.00435836	1.14002
ENSG00000244115	DNAJC25-GNG10	ENSG00000244115.1	0.00484046	0.0499939	0.28864	0.00187205	0.000797861	1.23041
ENSG00000138031	ADCY3	ENSG00000138031.10	0.00298291	0.0500237	0.288647	0.00234546	0.00150809	0.637152
ENSG00000179941	BBS10	ENSG00000179941.6	0.00393438	0.0502687	0.289232	0.00350572	0.00153404	1.19237
ENSG00000172590	MRPL52	ENSG00000172590.14	0.00852544	0.0503936	0.289509	0.00700594	0.0046563	0.589395
ENSG00000164169	PRMT9	ENSG00000164169.8	0.00363156	0.0505603	0.289916	0.00542298	0.00237584	1.19065
ENSG00000242028	HYPK	ENSG00000242028.1	0.00653258	0.0507564	0.290544	0.00374383	0.00263262	0.508017
ENSG00000087053	MTMR2	ENSG00000087053.14	0.00274066	0.0509209	0.29132	0.0013181	0.000793592	0.731988
ENSG00000257411	ENSG00000257411	ENSG00000257411.1	0.00206971	0.051282	0.292628	0.00167093	0.000981033	0.768276
ENSG00000175376	EIF1AD	ENSG00000175376.4	0.00163045	0.0514522	0.292628	0.00277013	0.00146376	0.92027
ENSG00000166200	COPS2	ENSG00000166200.10	0.00493034	0.0515164	0.292628	0.00232109	0.00151146	0.618859
ENSG00000163293	NIPAL1	ENSG00000163293.7	0.003562	0.0515855	0.292628	0.00449987	0.00221357	1.02351
ENSG00000197208	SLC22A4	ENSG00000197208.5	0.00235328	0.0521683	0.293948	0.007795	0.00398605	0.967588
ENSG00000154781	CCDC174	ENSG00000154781.11	0.00269087	0.0522356	0.293948	0.002434	0.00103025	1.24033
ENSG00000118046	STK11	ENSG00000118046.10	0.00989843	0.0523332	0.294053	0.00199961	0.000966606	1.04872
ENSG00000227057	WDR46	ENSG00000227057.3	0.00467002	0.0523834	0.294171	0.00289988	0.00190025	0.609804
ENSG00000139719	VPS33A	ENSG00000139719.5	0.00198318	0.0524769	0.294204	0.00334187	0.00230038	0.538784
ENSG00000172171	TEFM	ENSG00000172171.6	0.00398522	0.052958	0.295635	0.00231409	0.00101435	1.18989
ENSG00000141376	BCAS3	ENSG00000141376.16	0.00370684	0.0529946	0.295635	0.00411967	0.00229588	0.843479
ENSG00000270757	HSPE1-MOB4	ENSG00000270757.1	0.00295797	0.0529965	0.295635	0.00202105	0.000939133	1.1057
ENSG00000054793	ATP9A	ENSG00000054793.9	0.00179097	0.0530808	0.295802	0.00329535	0.00194358	0.761716
ENSG00000104907	TRMT1	ENSG00000104907.8	0.0073578	0.0531673	0.29595	0.00210554	0.00126835	0.731243
ENSG00000047644	WWC3	ENSG00000047644.13	0.00217067	0.0531705	0.29595	0.00151315	0.000604601	1.3235
ENSG00000025156	HSF2	ENSG00000025156.8	0.00311446	0.0533635	0.296369	0.00309363	0.00192767	0.68244
ENSG00000143756	FBXO28	ENSG00000143756.7	0.00251177	0.0535428	0.297006	0.000838384	0.000533868	0.651129
ENSG00000213079	SCAF8	ENSG00000213079.5	0.00176444	0.0537668	0.297788	0.00186488	0.00125168	0.575213
ENSG00000100335	MIEF1	ENSG00000100335.8	0.00124962	0.0541629	0.298995	0.000903072	0.00045765	0.980596
ENSG00000132286	TIMM10B	ENSG00000132286.7	0.00292967	0.0545017	0.299386	0.00202175	0.00115524	0.807406
ENSG00000129473	BCL2L2	ENSG00000129473.5	0.00274688	0.0546865	0.299749	0.000913318	0.000465848	0.971257
ENSG00000169020	ATP5I	ENSG00000169020.5	0.0061914	0.0548288	0.300039	0.00464208	0.00320183	0.535876
ENSG00000163932	PRKCD	ENSG00000163932.9	0.00954744	0.0548835	0.300175	0.0149869	0.00598363	1.32461
ENSG00000272869	ENSG00000272869	ENSG00000272869.1	0.00323196	0.0550123	0.300583	0.00525495	0.00352062	0.577848
ENSG00000140474	ULK3	ENSG00000140474.8	0.00472443	0.055185	0.30117	0.00251436	0.00108225	1.21616
ENSG00000134440	NARS	ENSG00000134440.7	0.00216486	0.0553131	0.301705	0.0024509	0.00169154	0.534973
ENSG00000169251	NMD3	ENSG00000169251.8	0.00236215	0.0553693	0.301848	0.00200867	0.00139053	0.530611
ENSG00000048991	R3HDM1	ENSG00000048991.12	0.00300699	0.0562711	0.305011	0.00285009	0.00158738	0.844367
ENSG00000198169	ZNF251	ENSG00000198169.4	0.00186297	0.0565443	0.305341	0.00138426	0.000646146	1.09919
ENSG00000183741	CBX6	ENSG00000183741.7	0.00765851	0.0570998	0.307052	0.00171001	0.00102713	0.735386
ENSG00000184209	SNRNP35	ENSG00000184209.14	0.00470709	0.0576216	0.30896	0.00398109	0.00188759	1.07662
ENSG00000144524	COPS7B	ENSG00000144524.13	0.00292565	0.0577779	0.309285	0.00304451	0.00136921	1.15286
ENSG00000130338	TULP4	ENSG00000130338.8	0.00169518	0.0578954	0.309713	0.00079477	0.000349591	1.18487
ENSG00000156928	MALSU1	ENSG00000156928.4	0.0021479	0.0579194	0.309713	0.00174579	0.00105014	0.7333
ENSG00000180611	MB21D2	ENSG00000180611.6	0.00213377	0.0579608	0.309771	0.00202395	0.00101579	0.994579
ENSG00000114270	COL7A1	ENSG00000114270.11	0.00674449	0.0583024	0.31067	0.00101217	0.000708915	0.513769
ENSG00000140395	WDR61	ENSG00000140395.4	0.0026029	0.0583601	0.31067	0.00393371	0.00204837	0.941413
ENSG00000131023	LATS1	ENSG00000131023.8	0.00267027	0.0583968	0.31067	0.00111701	0.000630659	0.824706
ENSG00000243207	PPAN-P2RY11	ENSG00000243207.2	0.00563372	0.0584285	0.31067	0.00443389	0.00277784	0.67461
ENSG00000137814	HAUS2	ENSG00000137814.5	0.00296638	0.0585152	0.31067	0.000726031	0.000256082	1.50343
ENSG00000114650	SCAP	ENSG00000114650.14	0.00404867	0.0585162	0.31067	0.00305794	0.00203325	0.58877
ENSG00000167088	SNRPD1	ENSG00000167088.6	0.0011622	0.0585918	0.31067	0.00275367	0.00182633	0.592406
ENSG00000136932	TRMO	ENSG00000136932.9	0.00167521	0.0585919	0.31067	0.00360465	0.00158874	1.18197
ENSG00000186130	ZBTB6	ENSG00000186130.4	0.00697551	0.0586655	0.310733	0.00274489	0.00176513	0.636971
ENSG00000188725	SMIM15	ENSG00000188725.3	0.00376529	0.0587144	0.310828	0.0011665	0.000669981	0.799997
ENSG00000262814	MRPL12	ENSG00000262814.2	0.0184797	0.0588402	0.310965	0.00746019	0.00526917	0.501637
ENSG00000181915	ADO	ENSG00000181915.3	0.00107437	0.0588442	0.310965	0.00224258	0.00121305	0.886523
ENSG00000162585	FAAP20	ENSG00000162585.12	0.0114913	0.0588637	0.310965	0.00793149	0.00477542	0.731964
ENSG00000168566	SNRNP48	ENSG00000168566.11	0.0036075	0.0590175	0.311614	0.001814	0.000819873	1.1457
ENSG00000185728	YTHDF3	ENSG00000185728.12	0.00297763	0.0592893	0.312517	0.00221457	0.00146219	0.598895
ENSG00000100393	EP300	ENSG00000100393.9	0.00147464	0.0593127	0.312517	0.00207213	0.00137435	0.592361
ENSG00000197548	ATG7	ENSG00000197548.8	0.00220176	0.0594231	0.312935	0.00311372	0.00206627	0.59161
ENSG00000111846	GCNT2	ENSG00000111846.11	0.00256794	0.0598448	0.314273	0.00378499	0.00136365	1.47281
ENSG00000172113	NME6	ENSG00000172113.4	0.00237283	0.0601945	0.314759	0.00373758	0.0019835	0.914055
ENSG00000104164	BLOC1S6	ENSG00000104164.6	0.00354628	0.0602352	0.314759	0.00049806	0.00022905	1.12066
ENSG00000183763	TRAIP	ENSG00000183763.4	0.00153057	0.0602758	0.314759	0.00310982	0.00171534	0.858332
ENSG00000102312	PORCN	ENSG00000102312.16	0.00594964	0.0605456	0.315597	0.0053248	0.0034164	0.64025
ENSG00000138101	DTNB	ENSG00000138101.14	0.00628368	0.0610633	0.317094	0.00421564	0.000924039	2.18973
ENSG00000175832	ETV4	ENSG00000175832.8	0.00384211	0.06121	0.317374	0.00177088	0.00110017	0.686741
ENSG00000141295	SCRN2	ENSG00000141295.9	0.00907104	0.0614178	0.317506	0.00264279	0.0012219	1.11294
ENSG00000135632	SMYD5	ENSG00000135632.7	0.00402343	0.0616564	0.317724	0.0017643	0.00106651	0.726202
ENSG00000120784	ZFP30	ENSG00000120784.11	0.00716813	0.0617995	0.317724	0.0021875	0.000449759	2.28206
ENSG00000079156	OSBPL6	ENSG00000079156.12	0.0042052	0.0620141	0.318419	0.00256899	0.00089422	1.5225
ENSG00000253506	NACA2	ENSG00000253506.1	0.00786373	0.0623265	0.319372	0.012373	0.00661173	0.904097
ENSG00000137038	TMEM261	ENSG00000137038.7	0.00213683	0.0626187	0.320055	0.00324761	0.00217259	0.579967
ENSG00000124762	CDKN1A	ENSG00000124762.9	0.00571988	0.0628366	0.320843	0.00144083	0.000665411	1.11458
ENSG00000080823	MOK	ENSG00000080823.17	0.00172489	0.0629403	0.321071	0.00176802	0.000944043	0.905209
ENSG00000008952	SEC62	ENSG00000008952.12	0.00270864	0.062961	0.321071	0.00369414	0.00258599	0.514522
ENSG00000171163	ZNF692	ENSG00000171163.11	0.00390186	0.0629769	0.321071	0.00217614	0.00115433	0.914717
ENSG00000211584	SLC48A1	ENSG00000211584.9	0.0048167	0.0630864	0.321304	0.00473306	0.00200194	1.24138
ENSG00000254093	PINX1	ENSG00000254093.4	0.00318008	0.0634558	0.322695	0.00369442	0.00186038	0.989756
ENSG00000120688	WBP4	ENSG00000120688.7	0.00176117	0.0636424	0.323154	0.00223273	0.000773613	1.52912
ENSG00000138138	ATAD1	ENSG00000138138.9	0.00374333	0.0639695	0.323746	0.00432122	0.00288745	0.581644
ENSG00000174996	KLC2	ENSG00000174996.7	0.00834861	0.0640347	0.323746	0.00303186	0.00146015	1.05408
ENSG00000063601	MTMR1	ENSG00000063601.12	0.00269488	0.0642578	0.32448	0.00748707	0.00234075	1.67743
ENSG00000085224	ATRX	ENSG00000085224.16	0.0035412	0.0644292	0.325019	0.00152705	0.000986046	0.631023
ENSG00000177030	DEAF1	ENSG00000177030.12	0.00795446	0.0645676	0.325307	0.00188625	0.000752975	1.32485
ENSG00000173894	CBX2	ENSG00000173894.6	0.00455169	0.0647841	0.325667	0.00269866	0.000635039	2.08733
ENSG00000006118	TMEM132A	ENSG00000006118.10	0.00974398	0.064931	0.326155	0.00374254	0.00179504	1.06
ENSG00000007080	CCDC124	ENSG00000007080.6	0.0146519	0.064946	0.326155	0.00930336	0.00625565	0.572591
ENSG00000139405	RITA1	ENSG00000139405.11	0.00552213	0.0652459	0.326977	0.0018998	0.00105047	0.85482
ENSG00000037241	RPL26L1	ENSG00000037241.3	0.00194895	0.0652721	0.326977	0.0011305	0.000427466	1.40308
ENSG00000196639	HRH1	ENSG00000196639.6	0.00170006	0.0654017	0.327068	0.00379471	0.00247019	0.619369
ENSG00000064999	ANKS1A	ENSG00000064999.12	0.00359224	0.0654202	0.327068	0.00285834	0.00138588	1.04437
ENSG00000197024	ZNF398	ENSG00000197024.4	0.00294431	0.0656225	0.327629	0.0019684	0.000827559	1.25009
ENSG00000151746	BICD1	ENSG00000151746.9	0.00244781	0.0656768	0.327629	0.00274124	0.00147399	0.895098
ENSG00000131871	SELENOS	ENSG00000131871.10	0.00230327	0.065695	0.327629	0.00425782	0.00272436	0.644199
ENSG00000143256	PFDN2	ENSG00000143256.4	0.00367057	0.0659032	0.328112	0.00726984	0.00504731	0.526409
ENSG00000158006	PAFAH2	ENSG00000158006.9	0.00161371	0.065996	0.328124	0.00346864	0.00188947	0.876391
ENSG00000114315	HES1	ENSG00000114315.3	0.00318078	0.0662374	0.328868	0.0030445	0.000477443	2.6728
ENSG00000116251	RPL22	ENSG00000116251.5	0.000936147	0.066411	0.329515	0.000729658	0.000401951	0.860199
ENSG00000104976	SNAPC2	ENSG00000104976.7	0.00866918	0.0665092	0.329515	0.00358718	0.00189047	0.924106
ENSG00000142528	ZNF473	ENSG00000142528.11	0.00213806	0.0665741	0.329565	0.00138539	0.000513187	1.43273
ENSG00000187800	PEAR1	ENSG00000187800.9	0.00552972	0.0666408	0.329703	0.0113535	0.00415374	1.45065
ENSG00000144355	DLX1	ENSG00000144355.10	0.00511421	0.0672118	0.33163	0.00277751	0.000892322	1.63816
ENSG00000153037	SRP19	ENSG00000153037.8	0.00202781	0.0672219	0.33163	0.00182368	0.00128905	0.500545
ENSG00000143977	SNRPG	ENSG00000143977.9	0.00232771	0.067261	0.331661	0.00197681	0.000950266	1.05677
ENSG00000174405	LIG4	ENSG00000174405.9	0.00589993	0.0673878	0.332064	0.00273458	0.00101631	1.42798
ENSG00000144218	AFF3	ENSG00000144218.14	0.00510005	0.0674088	0.332064	0.00268014	0.00143374	0.902527
ENSG00000115844	DLX2	ENSG00000115844.6	0.0160795	0.067495	0.332326	0.0102969	0.00358248	1.52317
ENSG00000125249	RAP2A	ENSG00000125249.6	0.00599308	0.0681313	0.333917	0.000903751	0.000455689	0.987875
ENSG00000137824	RMDN3	ENSG00000137824.11	0.00433314	0.0681525	0.333917	0.00522189	0.00315854	0.725313
ENSG00000158636	EMSY	ENSG00000158636.12	0.00342524	0.0682855	0.333917	0.00252573	0.00143925	0.811387
ENSG00000040199	PHLPP2	ENSG00000040199.14	0.00152359	0.068298	0.333917	0.00119517	0.000671427	0.83191
ENSG00000060339	CCAR1	ENSG00000060339.9	0.00412551	0.0684856	0.333995	0.00234448	0.00161326	0.539287
ENSG00000187838	PLSCR3	ENSG00000187838.12	0.0140382	0.068871	0.335177	0.00778879	0.0039521	0.97878
ENSG00000181378	CFAP65	ENSG00000181378.9	0.0060547	0.0690053	0.335177	0.756503	0.20822	1.86124
ENSG00000101997	CCDC22	ENSG00000101997.8	0.0052258	0.0691218	0.335289	0.00512751	0.00154659	1.72917
ENSG00000196683	TOMM7	ENSG00000196683.6	0.00628707	0.0692854	0.335289	0.00501555	0.0032617	0.620783
ENSG00000134262	AP4B1	ENSG00000134262.8	0.00119738	0.0692975	0.335289	0.00333565	0.00180791	0.883646
ENSG00000164068	RNF123	ENSG00000164068.11	0.002837	0.0693622	0.335289	0.00310067	0.00199316	0.637523
ENSG00000158850	B4GALT3	ENSG00000158850.10	0.0030469	0.0697758	0.336642	0.00231819	0.000993861	1.22188
ENSG00000134253	TRIM45	ENSG00000134253.5	0.00385044	0.0698577	0.336876	0.0035388	0.00113001	1.64693
ENSG00000134077	THUMPD3	ENSG00000134077.11	0.00252967	0.0701861	0.337532	0.00163014	0.000957296	0.767962
ENSG00000141564	RPTOR	ENSG00000141564.9	0.00493894	0.070295	0.337547	0.0028726	0.00189177	0.602619
ENSG00000064995	TAF11	ENSG00000064995.12	0.00211941	0.0704685	0.33788	0.00165091	0.000757603	1.12375
ENSG00000156017	CARNMT1	ENSG00000156017.8	0.00366445	0.0710232	0.339247	0.00112267	0.000589919	0.928347
ENSG00000132170	PPARG	ENSG00000132170.15	0.00400558	0.0711797	0.339672	0.00258278	0.000539301	2.25976
ENSG00000111361	EIF2B1	ENSG00000111361.8	0.00151202	0.0714919	0.340195	0.00279919	0.00153077	0.870751
ENSG00000110066	KMT5B	ENSG00000110066.10	0.00251174	0.071631	0.340696	0.00114738	0.000349406	1.71536
ENSG00000127527	EPS15L1	ENSG00000127527.9	0.00229166	0.0717724	0.34088	0.00488771	0.00290412	0.75106
ENSG00000159069	FBXW5	ENSG00000159069.9	0.00796344	0.071881	0.340918	0.00151945	0.000913565	0.733973
ENSG00000145335	SNCA	ENSG00000145335.11	0.00165943	0.0720368	0.341183	0.00498178	0.0024094	1.04799
ENSG00000105176	URI1	ENSG00000105176.13	0.00347954	0.0721819	0.341183	0.00162926	0.000959558	0.763772
ENSG00000157625	TAB3	ENSG00000157625.11	0.00175968	0.0723188	0.341547	0.00127769	0.000375581	1.76634
ENSG00000167767	KRT80	ENSG00000167767.9	0.00698258	0.0725317	0.342315	0.00311332	0.0013899	1.16347
ENSG00000178904	DPY19L3	ENSG00000178904.14	0.00419895	0.0725865	0.342315	0.00204608	0.000815238	1.32757
ENSG00000140263	SORD	ENSG00000140263.9	0.00242432	0.0726174	0.342315	0.00235669	0.00102224	1.20502
ENSG00000085760	MTIF2	ENSG00000085760.10	0.00224467	0.0732743	0.344444	0.00186675	0.00130259	0.51914
ENSG00000168453	HR	ENSG00000168453.10	0.00561211	0.0733886	0.344659	0.195977	0.130133	0.590699
ENSG00000116266	STXBP3	ENSG00000116266.6	0.00423619	0.073634	0.344722	0.00274882	0.00181207	0.601172
ENSG00000178074	C2orf69	ENSG00000178074.5	0.00270699	0.0736415	0.344722	0.00188889	0.000822669	1.19916
ENSG00000066027	PPP2R5A	ENSG00000066027.7	0.00273238	0.0738996	0.345769	0.00165102	0.000617498	1.41885
ENSG00000134779	TPGS2	ENSG00000134779.10	0.00276062	0.0741082	0.346267	0.00238493	0.00163694	0.542944
ENSG00000211450	SELENOH	ENSG00000211450.5	0.00475817	0.0741093	0.346267	0.00398305	0.00222396	0.840742
ENSG00000143319	ISG20L2	ENSG00000143319.12	0.00192469	0.0744287	0.347251	0.00119093	0.000675014	0.819093
ENSG00000203546	ENSG00000203546	ENSG00000203546.3	0.00136473	0.0744578	0.347251	0.0037831	0.00236233	0.679359
ENSG00000146828	SLC12A9	ENSG00000146828.13	0.00683017	0.0745904	0.347709	0.00724001	0.00491655	0.558344
ENSG00000034152	MAP2K3	ENSG00000034152.14	0.00590282	0.0749827	0.348816	0.00393295	0.00245587	0.679377
ENSG00000107890	ANKRD26	ENSG00000107890.12	0.00286504	0.0750608	0.348816	0.00221713	0.00101926	1.12117
ENSG00000219481	NBPF1	ENSG00000219481.6	0.00131352	0.075456	0.349882	0.000856263	0.000549599	0.639673
ENSG00000137310	TCF19	ENSG00000137310.7	0.00168833	0.0754787	0.349882	0.000944852	0.000584254	0.693494
ENSG00000156990	RPUSD3	ENSG00000156990.10	0.00281786	0.0758647	0.351048	0.0033539	0.00166447	1.01078
ENSG00000126903	SLC10A3	ENSG00000126903.11	0.0044724	0.0760602	0.35163	0.00352042	0.00246163	0.516137
ENSG00000128626	MRPS12	ENSG00000128626.7	0.00815831	0.0762298	0.351929	0.00402527	0.00252531	0.672626
ENSG00000114388	NPRL2	ENSG00000114388.8	0.00152199	0.0766703	0.352819	0.00707347	0.00410078	0.786522
ENSG00000166401	SERPINB8	ENSG00000166401.9	0.00232233	0.0767029	0.352819	0.00250345	0.00109073	1.19862
ENSG00000140988	RPS2	ENSG00000140988.11	0.00543097	0.0767422	0.352839	0.000867479	0.000562866	0.624038
ENSG00000031691	CENPQ	ENSG00000031691.6	0.00793886	0.0771014	0.353349	0.00340735	0.00191094	0.834365
ENSG00000179115	FARSA	ENSG00000179115.6	0.00434046	0.0773106	0.353837	0.00302669	0.00209889	0.528118
ENSG00000141858	SAMD1	ENSG00000141858.7	0.00412915	0.0776661	0.354049	0.00271164	0.00171574	0.660332
ENSG00000089289	IGBP1	ENSG00000089289.11	0.00203022	0.0777341	0.354049	0.00222137	0.0011294	0.975892
ENSG00000178607	ERN1	ENSG00000178607.11	0.00250219	0.0777851	0.354049	0.00214362	0.0013625	0.653795
ENSG00000173660	UQCRH	ENSG00000173660.7	0.000977284	0.0778295	0.354049	0.00153704	0.000804035	0.934824
ENSG00000077348	EXOSC5	ENSG00000077348.4	0.00486388	0.0778492	0.354049	0.00669979	0.00463864	0.530414
ENSG00000196943	NOP9	ENSG00000196943.8	0.00198015	0.0782526	0.35437	0.00206286	0.00124202	0.731958
ENSG00000265681	RPL17	ENSG00000265681.2	0.00355357	0.0784155	0.354383	0.00110674	0.000676178	0.710844
ENSG00000008283	CYB561	ENSG00000008283.11	0.00292545	0.0785829	0.354821	0.00425843	0.00261765	0.702049
ENSG00000129315	CCNT1	ENSG00000129315.5	0.00293677	0.0793821	0.35626	0.00131052	0.000836397	0.647884
ENSG00000184178	SCFD2	ENSG00000184178.11	0.00105031	0.0794929	0.356373	0.00197683	0.00133114	0.57052
ENSG00000064102	INTS13	ENSG00000064102.10	0.00259577	0.0795684	0.35645	0.00191135	0.00134256	0.509606
ENSG00000074416	MGLL	ENSG00000074416.9	0.00366474	0.0798031	0.356494	0.000811794	0.000515383	0.655469
ENSG00000176058	TPRN	ENSG00000176058.7	0.00755159	0.0798965	0.356595	0.00242936	0.00115876	1.068
ENSG00000081721	DUSP12	ENSG00000081721.7	0.00179698	0.0800419	0.356696	0.00143664	0.000558509	1.36304
ENSG00000174282	ZBTB4	ENSG00000174282.7	0.00372167	0.0802517	0.35721	0.00216383	0.00128648	0.75016
ENSG00000182919	C11orf54	ENSG00000182919.10	0.00544124	0.0804623	0.357498	0.00388921	0.00124983	1.63774
ENSG00000148842	CNNM2	ENSG00000148842.13	0.00241601	0.0807109	0.358008	0.00145827	0.000563777	1.37106
ENSG00000120314	WDR55	ENSG00000120314.14	0.00200567	0.0808636	0.358527	0.00171567	0.000959284	0.83874
ENSG00000132612	VPS4A	ENSG00000132612.14	0.00381323	0.0813197	0.359935	0.00173879	0.00122372	0.506813
ENSG00000166167	BTRC	ENSG00000166167.13	0.00226048	0.081324	0.359935	0.00233987	0.000826983	1.5005
ENSG00000135924	DNAJB2	ENSG00000135924.11	0.00751517	0.0815813	0.360336	0.00110745	0.000454798	1.28395
ENSG00000066926	FECH	ENSG00000066926.6	0.00246801	0.0816293	0.360336	0.00197322	0.000889384	1.14967
ENSG00000155876	RRAGA	ENSG00000155876.4	0.00217897	0.0821556	0.361391	0.00863996	0.0054664	0.660433
ENSG00000115289	PCGF1	ENSG00000115289.8	0.0030326	0.0824779	0.361871	0.00282866	0.00183134	0.627223
ENSG00000074855	ANO8	ENSG00000074855.6	0.00729245	0.0826	0.361871	0.0081316	0.00449594	0.854919
ENSG00000130119	GNL3L	ENSG00000130119.11	0.000885421	0.0826356	0.361871	0.00264541	0.00184551	0.519477
ENSG00000127564	PKMYT1	ENSG00000127564.12	0.0105547	0.0826434	0.361871	0.00499938	0.00325718	0.618125
ENSG00000181938	GINS3	ENSG00000181938.9	0.00203035	0.0826867	0.361871	0.00272793	0.00169411	0.687283
ENSG00000134759	ELP2	ENSG00000134759.9	0.00223549	0.0828671	0.362146	0.00269916	0.00160419	0.750666
ENSG00000074755	ZZEF1	ENSG00000074755.10	0.00229138	0.083168	0.362497	0.0016016	0.000947144	0.757854
ENSG00000171148	TADA3	ENSG00000171148.9	0.00415504	0.0832351	0.362497	0.00363624	0.00217682	0.740222
ENSG00000106299	WASL	ENSG00000106299.7	0.00231582	0.0837119	0.363521	0.00158426	0.00093594	0.759318
ENSG00000198252	STYX	ENSG00000198252.7	0.00532728	0.0838229	0.363642	0.000787802	0.000353502	1.15612
ENSG00000166347	CYB5A	ENSG00000166347.14	0.00170489	0.0839537	0.36389	0.00567763	0.00366677	0.63078
ENSG00000118985	ELL2	ENSG00000118985.10	0.00307924	0.0841552	0.36389	0.000381853	0.000213303	0.840117
ENSG00000114648	KLHL18	ENSG00000114648.7	0.00232454	0.084235	0.36389	0.00156878	0.000860033	0.867183
ENSG00000117174	ZNHIT6	ENSG00000117174.6	0.00202578	0.0843572	0.36389	0.00290671	0.00194715	0.578024
ENSG00000129250	KIF1C	ENSG00000129250.7	0.00390435	0.0843618	0.36389	0.000843628	0.000538213	0.648429
ENSG00000018510	AGPS	ENSG00000018510.8	0.00282094	0.0844124	0.36389	0.00216394	0.00150069	0.528031
ENSG00000155115	GTF3C6	ENSG00000155115.6	0.00470614	0.0847955	0.364999	0.00168315	0.000668918	1.33126
ENSG00000119408	NEK6	ENSG00000119408.12	0.00265858	0.085045	0.365232	0.0030453	0.00208481	0.546667
ENSG00000144645	OSBPL10	ENSG00000144645.9	0.00191473	0.0851944	0.365342	0.00189134	0.00103766	0.866072
ENSG00000004139	SARM1	ENSG00000004139.9	0.00457763	0.0854968	0.366015	0.00191808	0.000785367	1.28822
ENSG00000109686	SH3D19	ENSG00000109686.12	0.00331685	0.0855472	0.366075	0.000501857	0.000225283	1.15554
ENSG00000146535	GNA12	ENSG00000146535.9	0.0060545	0.085698	0.366409	0.00180506	0.00112194	0.686057
ENSG00000037749	MFAP3	ENSG00000037749.7	0.00280538	0.0858933	0.366631	0.00260364	0.001759	0.565772
ENSG00000135617	PRADC1	ENSG00000135617.3	0.00584325	0.0858955	0.366631	0.00235836	0.00136933	0.784313
ENSG00000147799	ARHGAP39	ENSG00000147799.7	0.00598123	0.086261	0.367422	0.00408597	0.00147964	1.46544
ENSG00000065491	TBC1D22B	ENSG00000065491.8	0.00191742	0.086465	0.367585	0.00318785	0.00189379	0.751309
ENSG00000174371	EXO1	ENSG00000174371.12	0.00159544	0.0866833	0.368121	0.00185956	0.00123587	0.589434
ENSG00000104825	NFKBIB	ENSG00000104825.12	0.00698058	0.0870923	0.368487	0.00282898	0.00128269	1.14111
ENSG00000215375	MYL5	ENSG00000215375.2	0.00656664	0.0871561	0.368487	0.00526141	0.0034738	0.598934
ENSG00000135899	SP110	ENSG00000135899.12	0.0017565	0.0879534	0.37066	0.00550194	0.00274427	1.00352
ENSG00000175130	MARCKSL1	ENSG00000175130.6	0.0050872	0.0880181	0.37066	0.00633702	0.00384115	0.722268
ENSG00000126524	SBDS	ENSG00000126524.5	0.00277906	0.0881727	0.370848	0.00182393	0.00112275	0.700012
ENSG00000176155	CCDC57	ENSG00000176155.14	0.00465367	0.0882418	0.370984	0.0035006	0.00184205	0.926285
ENSG00000173171	MTX1	ENSG00000173171.10	0.00232207	0.0883349	0.370993	0.00519472	0.0024137	1.1058
ENSG00000125841	NRSN2	ENSG00000125841.8	0.00593202	0.0883774	0.370993	0.00603733	0.00403514	0.581293
ENSG00000178761	FAM219B	ENSG00000178761.10	0.00306103	0.0884926	0.370993	0.00114732	0.000334199	1.77948
ENSG00000128059	PPAT	ENSG00000128059.4	0.00325592	0.0885754	0.370993	0.00148271	0.000783822	0.919635
ENSG00000170385	SLC30A1	ENSG00000170385.9	0.00413596	0.0886749	0.371143	0.00314225	0.00208806	0.589637
ENSG00000143889	HNRNPLL	ENSG00000143889.11	0.00220227	0.0887263	0.371143	0.00277846	0.00196028	0.503226
ENSG00000130779	CLIP1	ENSG00000130779.15	0.00180788	0.0892473	0.372412	0.00198311	0.00138969	0.513001
ENSG00000163170	BOLA3	ENSG00000163170.7	0.00340073	0.0895623	0.373225	0.00231062	0.00145608	0.666194
ENSG00000005483	KMT2E	ENSG00000005483.15	0.00235641	0.0896511	0.373225	0.00214811	0.00137174	0.647061
ENSG00000046604	DSG2	ENSG00000046604.8	0.00483633	0.0898353	0.373397	0.0059301	0.00322233	0.879952
ENSG00000264668	ENSG00000264668	ENSG00000264668.1	0.00781313	0.0899819	0.37362	0.00255683	0.000779244	1.71421
ENSG00000149658	YTHDF1	ENSG00000149658.13	0.0022555	0.0901704	0.373786	0.00235097	0.00148882	0.659086
ENSG00000100281	HMGXB4	ENSG00000100281.9	0.00129421	0.0903283	0.373968	0.00337471	0.0021616	0.642662
ENSG00000110274	CEP164	ENSG00000110274.10	0.00314014	0.0911378	0.375477	0.00245122	0.00135082	0.859663
ENSG00000118922	KLF12	ENSG00000118922.12	0.00275514	0.0916381	0.376521	0.000601297	0.000242776	1.30845
ENSG00000148925	BTBD10	ENSG00000148925.6	0.00351388	0.0917805	0.376521	0.000897178	0.00044815	1.00141
ENSG00000204116	CHIC1	ENSG00000204116.7	0.00542133	0.0919128	0.376521	0.00107537	0.000376911	1.51254
ENSG00000120318	ARAP3	ENSG00000120318.11	0.0029177	0.0919291	0.376521	0.00174916	0.00101699	0.782348
ENSG00000175193	PARL	ENSG00000175193.8	0.00252936	0.0920361	0.376712	0.00209849	0.00113716	0.883911
ENSG00000143774	GUK1	ENSG00000143774.12	0.0063993	0.0922148	0.376992	0.00290718	0.0019766	0.556599
ENSG00000066654	THUMPD1	ENSG00000066654.8	0.00323406	0.0922754	0.376992	0.00116313	0.000792014	0.554414
ENSG00000102078	SLC25A14	ENSG00000102078.11	0.00229322	0.0923667	0.376992	0.00242372	0.000873329	1.47262
ENSG00000143669	LYST	ENSG00000143669.9	0.00293009	0.0926596	0.377576	0.00292427	0.00167225	0.806285
ENSG00000175782	SLC35E3	ENSG00000175782.8	0.00159118	0.0935172	0.379381	0.00689861	0.0033376	1.04749
ENSG00000147533	GOLGA7	ENSG00000147533.12	0.00174902	0.0936456	0.379427	0.00155101	0.000845247	0.875762
ENSG00000071994	PDCD2	ENSG00000071994.6	0.00176233	0.0936717	0.379427	0.0015165	0.000934639	0.698268
ENSG00000185973	TMLHE	ENSG00000185973.6	0.00288286	0.0937809	0.379427	0.00674415	0.0040907	0.721289
ENSG00000117425	PTCH2	ENSG00000117425.9	0.00998453	0.0938171	0.379427	0.0175842	0.0113366	0.63329
ENSG00000144029	MRPS5	ENSG00000144029.7	0.00141207	0.0939152	0.379427	0.0023045	0.00161826	0.510006
ENSG00000010626	LRRC23	ENSG00000010626.10	0.00737644	0.0940049	0.379427	0.00672812	0.00320725	1.06886
ENSG00000141219	C17orf80	ENSG00000141219.11	0.00110737	0.094014	0.379427	0.00124549	0.000673576	0.886799
ENSG00000118246	FASTKD2	ENSG00000118246.9	0.00469703	0.0940586	0.379427	0.00405735	0.00252764	0.682747
ENSG00000254004	ZNF260	ENSG00000254004.2	0.0045092	0.094369	0.380199	0.000959767	0.000473737	1.0186
ENSG00000163006	CCDC138	ENSG00000163006.7	0.00466112	0.0944602	0.380199	0.00176339	0.000382912	2.20327
ENSG00000153443	UBALD1	ENSG00000153443.8	0.00836156	0.0945688	0.380418	0.00539065	0.00305881	0.817487
ENSG00000069956	MAPK6	ENSG00000069956.7	0.0043063	0.094907	0.38118	0.000802153	0.000383444	1.06486
ENSG00000258429	PDF	ENSG00000258429.1	0.00348385	0.0950329	0.381196	0.00256404	0.00170095	0.592078
ENSG00000121039	RDH10	ENSG00000121039.5	0.00158278	0.0955288	0.381997	0.00263279	0.00119732	1.13678
ENSG00000015171	ZMYND11	ENSG00000015171.14	0.00301212	0.0957376	0.382116	0.00102658	0.000644137	0.672412
ENSG00000163156	SCNM1	ENSG00000163156.7	0.00300414	0.0957841	0.382116	0.00331391	0.00197565	0.746208
ENSG00000140598	EFL1	ENSG00000140598.9	0.00193199	0.0957852	0.382116	0.00147941	0.00067425	1.13367
ENSG00000132275	RRP8	ENSG00000132275.6	0.00166083	0.0963965	0.383732	0.00165288	0.00107825	0.616294
ENSG00000100380	ST13	ENSG00000100380.8	0.00263475	0.0964802	0.383732	0.000638737	0.000264093	1.27418
ENSG00000204767	FAM196B	ENSG00000204767.3	0.00177493	0.0965334	0.383732	0.00105314	0.000480644	1.13165
ENSG00000160570	DEDD2	ENSG00000160570.9	0.0107179	0.0971308	0.384892	0.00241577	0.00120712	1.00091
ENSG00000067248	DHX29	ENSG00000067248.5	0.00374078	0.0974811	0.385414	0.00128829	0.000648735	0.989753
ENSG00000158985	CDC42SE2	ENSG00000158985.9	0.00256623	0.0974967	0.385414	0.00155546	0.000956115	0.702086
ENSG00000104892	KLC3	ENSG00000104892.12	0.0101155	0.0980268	0.386689	0.00175581	0.00064966	1.43438
ENSG00000109790	KLHL5	ENSG00000109790.12	0.00236347	0.0983902	0.387518	0.000894132	0.000515215	0.795313
ENSG00000111144	LTA4H	ENSG00000111144.5	0.00159084	0.0987812	0.38883	0.00474012	0.00296496	0.676914
ENSG00000181991	MRPS11	ENSG00000181991.11	0.00216509	0.0989532	0.389355	0.00288307	0.00172871	0.737908
ENSG00000025293	PHF20	ENSG00000025293.11	0.00107297	0.0991502	0.389832	0.00214159	0.00124032	0.787963
ENSG00000091640	SPAG7	ENSG00000091640.3	0.0022412	0.0996092	0.391019	0.00343809	0.00188134	0.869848
ENSG00000173621	LRFN4	ENSG00000173621.8	0.0224358	0.0999274	0.391201	0.00227041	0.00103408	1.13461
ENSG00000165943	MOAP1	ENSG00000165943.4	0.00306771	0.100296	0.391706	0.00382209	0.00228692	0.740956
ENSG00000163788	SNRK	ENSG00000163788.9	0.00215377	0.100573	0.392205	0.0012012	0.000662159	0.859226
ENSG00000256950	ENSG00000256950	ENSG00000256950.2	0.00302544	0.10062	0.392235	0.00473981	0.00310672	0.60944
ENSG00000116191	RALGPS2	ENSG00000116191.13	0.00254456	0.101353	0.39372	0.0018768	0.00110556	0.763499
ENSG00000179364	PACS2	ENSG00000179364.9	0.00651162	0.10176	0.394777	0.00150882	0.00101741	0.568521
ENSG00000169241	SLC50A1	ENSG00000169241.13	0.00232309	0.101982	0.39517	0.00808143	0.00437143	0.886505
ENSG00000130312	MRPL34	ENSG00000130312.2	0.0188903	0.102275	0.395624	0.00910873	0.00459635	0.986762
ENSG00000107745	MICU1	ENSG00000107745.12	0.00291657	0.10257	0.396156	0.0053869	0.0033942	0.666383
ENSG00000160214	RRP1	ENSG00000160214.8	0.0058247	0.102649	0.396156	0.00290308	0.00198757	0.546578
ENSG00000163159	VPS72	ENSG00000163159.7	0.00507167	0.102902	0.396511	0.00241596	0.0015054	0.682457
ENSG00000084092	NOA1	ENSG00000084092.6	0.00147413	0.102931	0.396511	0.00324483	0.00203503	0.67309
ENSG00000065268	WDR18	ENSG00000065268.6	0.0126074	0.103202	0.397224	0.00734625	0.00407249	0.851098
ENSG00000114770	ABCC5	ENSG00000114770.12	0.00145667	0.103749	0.39819	0.00268166	0.00176909	0.60012
ENSG00000142327	RNPEPL1	ENSG00000142327.7	0.0115412	0.103778	0.39819	0.00228994	0.000810458	1.4985
ENSG00000104951	IL4I1	ENSG00000104951.11	0.010047	0.103811	0.39819	0.0072314	0.00469219	0.624014
ENSG00000197562	RAB40C	ENSG00000197562.5	0.00881831	0.10398	0.39819	0.00352142	0.00147386	1.25656
ENSG00000108641	B9D1	ENSG00000108641.10	0.00351267	0.104082	0.39819	0.00689528	0.00234242	1.55761
ENSG00000132591	ERAL1	ENSG00000132591.7	0.00173855	0.104328	0.39819	0.00417427	0.00279746	0.57741
ENSG00000120800	UTP20	ENSG00000120800.4	0.00238264	0.104382	0.39819	0.000931366	0.000563259	0.72555
ENSG00000170191	NANP	ENSG00000170191.4	0.00250779	0.10442	0.39819	0.00146082	0.000789606	0.887572
ENSG00000170310	STX8	ENSG00000170310.10	0.00185116	0.104482	0.39819	0.00349148	0.00201664	0.791882
ENSG00000142409	ZNF787	ENSG00000142409.4	0.0130167	0.104521	0.39819	0.00267142	0.00179376	0.574616
ENSG00000187583	PLEKHN1	ENSG00000187583.6	0.015666	0.10482	0.399028	0.0051168	0.00200941	1.34847
ENSG00000150457	LATS2	ENSG00000150457.7	0.00258715	0.104897	0.399118	0.00135478	0.000739651	0.873141
ENSG00000117475	BLZF1	ENSG00000117475.9	0.00336733	0.105159	0.399715	0.00182501	0.0011839	0.624361
ENSG00000161992	PRR35	ENSG00000161992.5	0.00730333	0.105253	0.39983	10.175	4.72464	1.10674
ENSG00000110841	PPFIBP1	ENSG00000110841.9	0.00211221	0.105756	0.400953	0.00201557	0.00139384	0.532117
ENSG00000115761	NOL10	ENSG00000115761.11	0.0028995	0.105933	0.401144	0.0021055	0.00113799	0.887676
ENSG00000104228	TRIM35	ENSG00000104228.8	0.00473119	0.106484	0.401576	0.00239984	0.000790581	1.60195
ENSG00000125534	PPDPF	ENSG00000125534.5	0.0266295	0.106524	0.401576	0.0109953	0.00729666	0.591573
ENSG00000165671	NSD1	ENSG00000165671.14	0.00113757	0.106626	0.401608	0.00126729	0.000869391	0.543667
ENSG00000165055	METTL2B	ENSG00000165055.11	0.00216726	0.10699	0.402271	0.00151281	0.000726061	1.05907
ENSG00000198791	CNOT7	ENSG00000198791.7	0.002797	0.107197	0.402587	0.000625875	0.000307604	1.0248
ENSG00000237765	FAM200B	ENSG00000237765.2	0.0040135	0.107436	0.402587	0.000981623	0.000251593	1.96408
ENSG00000119537	KDSR	ENSG00000119537.11	0.00133391	0.107459	0.402587	0.00488796	0.00312797	0.644007
ENSG00000173273	TNKS	ENSG00000173273.11	0.00278963	0.107529	0.402645	0.00233333	0.0015364	0.60283
ENSG00000198420	TCAF1	ENSG00000198420.5	0.00217349	0.108126	0.404082	0.00334572	0.00213514	0.647989
ENSG00000170545	SMAGP	ENSG00000170545.12	0.00198471	0.108715	0.405177	0.00253318	0.0014971	0.758777
ENSG00000136146	MED4	ENSG00000136146.10	0.00454961	0.109383	0.405602	0.00288895	0.00165774	0.801324
ENSG00000112167	SAYSD1	ENSG00000112167.5	0.0022958	0.109385	0.405602	0.00323857	0.00129577	1.32155
ENSG00000115541	HSPE1	ENSG00000115541.6	0.00158846	0.109719	0.406162	0.00152083	0.000897417	0.761004
ENSG00000065328	MCM10	ENSG00000065328.12	0.00290565	0.109966	0.40633	0.00154554	0.000984694	0.65036
ENSG00000143450	OAZ3	ENSG00000143450.10	0.00251988	0.110073	0.406576	0.0101559	0.00582093	0.802999
ENSG00000132600	PRMT7	ENSG00000132600.12	0.00413535	0.110188	0.406639	0.00482328	0.00299967	0.68521
ENSG00000157823	AP3S2	ENSG00000157823.12	0.00188289	0.110252	0.406639	0.00187109	0.00117578	0.67026
ENSG00000109452	INPP4B	ENSG00000109452.8	0.00393763	0.111042	0.4081	0.00139158	0.000810443	0.779939
ENSG00000100319	ZMAT5	ENSG00000100319.11	0.00664115	0.111053	0.4081	0.00362562	0.00205177	0.821355
ENSG00000109171	SLAIN2	ENSG00000109171.10	0.00329094	0.11167	0.409472	0.00217297	0.00137033	0.665148
ENSG00000154127	UBASH3B	ENSG00000154127.5	0.00178516	0.111919	0.409655	0.000817033	0.000507852	0.685986
ENSG00000076321	KLHL20	ENSG00000076321.6	0.00223298	0.112094	0.409823	0.00323619	0.00184076	0.813993
ENSG00000099377	HSD3B7	ENSG00000099377.9	0.0128274	0.112132	0.409823	0.0091822	0.0047357	0.955261
ENSG00000121152	NCAPH	ENSG00000121152.5	0.00188702	0.112132	0.409823	0.00571443	0.00389126	0.554372
ENSG00000105552	BCAT2	ENSG00000105552.10	0.00554975	0.112186	0.40987	0.00606805	0.00407955	0.572824
ENSG00000121900	TMEM54	ENSG00000121900.14	0.00421953	0.112359	0.410081	0.00521766	0.00332645	0.64942
ENSG00000010219	DYRK4	ENSG00000010219.9	0.0019277	0.112622	0.410081	0.00152893	0.000844954	0.855574
ENSG00000196935	SRGAP1	ENSG00000196935.4	0.00363562	0.112692	0.410081	0.00170167	0.00104823	0.698989
ENSG00000172936	MYD88	ENSG00000172936.8	0.0134411	0.113041	0.410906	0.0042557	0.0018144	1.2299
ENSG00000136868	SLC31A1	ENSG00000136868.9	0.00203033	0.113678	0.41218	0.00153211	0.00106459	0.525219
ENSG00000143575	HAX1	ENSG00000143575.10	0.00227943	0.114003	0.412655	0.00175022	0.00121409	0.527656
ENSG00000088833	NSFL1C	ENSG00000088833.13	0.00372549	0.114014	0.412655	0.00276198	0.00190475	0.5361
ENSG00000181773	GPR3	ENSG00000181773.6	0.00518066	0.114412	0.413594	0.00664993	0.00329468	1.0132
ENSG00000272647	ENSG00000272647	ENSG00000272647.1	0.00482707	0.11465	0.413626	0.00373376	0.00170607	1.12995
ENSG00000114999	TTL	ENSG00000114999.7	0.00198387	0.114745	0.413813	0.000659073	0.000438217	0.588794
ENSG00000165060	FXN	ENSG00000165060.7	0.00443588	0.114972	0.414131	0.00333298	0.000614989	2.43818
ENSG00000135272	MDFIC	ENSG00000135272.5	0.00236261	0.114998	0.414131	0.00117096	0.00069157	0.759741
ENSG00000149196	HIKESHI	ENSG00000149196.11	0.00162767	0.115904	0.415134	0.0064289	0.00333411	0.947271
ENSG00000138346	DNA2	ENSG00000138346.10	0.00366696	0.116568	0.416657	0.00233427	0.00132075	0.821611
ENSG00000104290	FZD3	ENSG00000104290.6	0.00678411	0.116697	0.416971	0.00252908	0.00101387	1.31874
ENSG00000184508	HDDC3	ENSG00000184508.6	0.00680058	0.116854	0.417384	0.0041838	0.000822032	2.34755
ENSG00000028116	VRK2	ENSG00000028116.12	0.00259095	0.116941	0.417396	0.00128485	0.000846783	0.601539
ENSG00000088766	CRLS1	ENSG00000088766.7	0.00186656	0.117123	0.417752	0.00252683	0.00171631	0.558022
ENSG00000137221	TJAP1	ENSG00000137221.10	0.00335774	0.117838	0.419559	0.00264385	0.00169107	0.644704
ENSG00000171488	LRRC8C	ENSG00000171488.10	0.00283525	0.118179	0.420624	0.00351742	0.00204428	0.782928
ENSG00000185917	SETD4	ENSG00000185917.9	0.00265832	0.118533	0.420923	0.00361417	0.00137377	1.39552
ENSG00000170525	PFKFB3	ENSG00000170525.14	0.00412698	0.118589	0.420923	0.00306958	0.00170724	0.846371
ENSG00000100347	SAMM50	ENSG00000100347.10	0.00102922	0.1187	0.420923	0.0059731	0.00395056	0.596423
ENSG00000171298	GAA	ENSG00000171298.8	0.00755858	0.119129	0.422066	0.0100125	0.00614269	0.704855
ENSG00000204516	MICB	ENSG00000204516.5	0.00116495	0.119185	0.422115	0.00208764	0.000965841	1.11201
ENSG00000175414	ARL10	ENSG00000175414.6	0.00340386	0.119535	0.422496	0.00861414	0.00598841	0.524533
ENSG00000142856	ITGB3BP	ENSG00000142856.12	0.00264865	0.119956	0.422911	0.00365156	0.00255598	0.51464
ENSG00000259305	ZHX1-C8orf76	ENSG00000259305.1	0.00251985	0.12044	0.423315	0.00354177	0.001858	0.930718
ENSG00000141965	FEM1A	ENSG00000141965.3	0.00387436	0.120658	0.423755	0.00102851	0.000608734	0.756678
ENSG00000138834	MAPK8IP3	ENSG00000138834.8	0.00738367	0.120727	0.423851	0.00119401	0.000730468	0.708925
ENSG00000176406	RIMS2	ENSG00000176406.16	0.00280757	0.120945	0.424023	0.00393202	0.00184704	1.09006
ENSG00000077463	SIRT6	ENSG00000077463.10	0.0152853	0.121081	0.424053	0.00869764	0.00520348	0.741147
ENSG00000169228	RAB24	ENSG00000169228.9	0.00477449	0.121181	0.424111	0.00359683	0.00220243	0.707631
ENSG00000175505	CLCF1	ENSG00000175505.9	0.00567452	0.121594	0.425261	0.00265809	0.00106125	1.32462
ENSG00000167695	FAM57A	ENSG00000167695.10	0.00424633	0.122187	0.426331	0.00454142	0.00274535	0.726153
ENSG00000148459	PDSS1	ENSG00000148459.11	0.00367685	0.122196	0.426331	0.00250941	0.00125895	0.995127
ENSG00000126821	SGPP1	ENSG00000126821.7	0.0046335	0.122565	0.426879	0.00434814	0.00297023	0.549821
ENSG00000127922	SEM1	ENSG00000127922.5	0.00170229	0.124326	0.431074	0.0030388	0.00180789	0.749199
ENSG00000197798	FAM118B	ENSG00000197798.4	0.00437845	0.124619	0.43168	0.00225575	0.00118084	0.933794
ENSG00000167315	ACAA2	ENSG00000167315.13	0.00178954	0.12464	0.43168	0.00357815	0.00194223	0.881496
ENSG00000116874	WARS2	ENSG00000116874.7	0.00232432	0.124817	0.431916	0.00237271	0.00150987	0.652113
ENSG00000183798	EMILIN3	ENSG00000183798.4	0.015934	0.125058	0.432081	0.776462	0.534563	0.538555
ENSG00000144802	NFKBIZ	ENSG00000144802.7	0.00266726	0.125245	0.432081	0.00163386	0.00105237	0.634636
ENSG00000102309	PIN4	ENSG00000102309.8	0.00283065	0.125478	0.432388	0.00316352	0.00179482	0.817695
ENSG00000186187	ZNRF1	ENSG00000186187.7	0.00652035	0.126084	0.433733	0.00286136	0.00175203	0.707675
ENSG00000169609	C15orf40	ENSG00000169609.9	0.00368256	0.126936	0.43549	0.00425305	0.00215323	0.981996
ENSG00000090097	PCBP4	ENSG00000090097.16	0.00683841	0.127065	0.43549	0.00276036	0.00127066	1.11929
ENSG00000118965	WDR35	ENSG00000118965.10	0.00338881	0.127113	0.43549	0.00228231	0.0014368	0.66763
ENSG00000198839	ZNF277	ENSG00000198839.5	0.00448135	0.127551	0.436064	0.00276154	0.00174436	0.662776
ENSG00000181026	AEN	ENSG00000181026.13	0.00330251	0.127844	0.436064	0.00122574	0.000547461	1.16283
ENSG00000135740	SLC9A5	ENSG00000135740.12	0.00501297	0.127953	0.436064	0.00500396	0.00285004	0.812089
ENSG00000100221	JOSD1	ENSG00000100221.6	0.00140338	0.127974	0.436064	0.000729155	0.000282841	1.36623
ENSG00000136147	PHF11	ENSG00000136147.12	0.00938079	0.128423	0.437001	0.00353412	0.00183897	0.942454
ENSG00000021762	OSBPL5	ENSG00000021762.15	0.0092252	0.128684	0.437449	0.00637021	0.00243075	1.38994
ENSG00000272741	ENSG00000272741	ENSG00000272741.1	0.00200862	0.129322	0.438136	0.00627304	0.00335999	0.90071
ENSG00000155975	VPS37A	ENSG00000155975.5	0.00274334	0.129542	0.438586	0.00225798	0.00121249	0.897056
ENSG00000149231	CCDC82	ENSG00000149231.7	0.0032715	0.129993	0.439802	0.00204174	0.000989615	1.04486
ENSG00000196440	ARMCX4	ENSG00000196440.7	0.00406622	0.130958	0.442339	0.00508996	0.00352801	0.528801
ENSG00000092445	TYRO3	ENSG00000092445.7	0.00643611	0.13127	0.442761	0.0018728	0.000664301	1.49529
ENSG00000103415	HMOX2	ENSG00000103415.7	0.00182596	0.131642	0.443607	0.00356842	0.00228935	0.640348
ENSG00000086015	MAST2	ENSG00000086015.16	0.00312619	0.131934	0.444148	0.00187092	0.00125546	0.575532
ENSG00000205189	ZBTB10	ENSG00000205189.7	0.00200231	0.132349	0.445052	0.00197495	0.000920387	1.10151
ENSG00000270316	BORCS7-ASMT	ENSG00000270316.1	0.00654172	0.132557	0.445501	0.0115691	0.00599326	0.948865
ENSG00000135679	MDM2	ENSG00000135679.17	0.00292835	0.132887	0.446162	0.000828663	0.00049021	0.757385
ENSG00000172717	FAM71D	ENSG00000172717.11	0.0327194	0.133584	0.447755	0.0620165	0.0304668	1.02542
ENSG00000073792	IGF2BP2	ENSG00000073792.11	0.00119886	0.133863	0.447795	0.00120693	0.000840757	0.521581
ENSG00000186283	TOR3A	ENSG00000186283.9	0.00347408	0.134512	0.448792	0.00522332	0.00349987	0.577668
ENSG00000163608	NEPRO	ENSG00000163608.10	0.00207526	0.134562	0.448792	0.00116842	0.000743257	0.65263
ENSG00000100575	TIMM9	ENSG00000100575.9	0.00159536	0.134859	0.449101	0.00298977	0.00186985	0.677113
ENSG00000116161	CACYBP	ENSG00000116161.13	0.00320391	0.135301	0.449768	0.00162474	0.00110583	0.555077
ENSG00000088854	C20orf194	ENSG00000088854.11	0.00272411	0.136142	0.451087	0.00299234	0.00163812	0.869237
ENSG00000143479	DYRK3	ENSG00000143479.11	0.00362225	0.136223	0.451087	0.00251409	0.00151831	0.727571
ENSG00000112304	ACOT13	ENSG00000112304.6	0.0026236	0.136536	0.451636	0.00343872	0.00221118	0.637056
ENSG00000137692	DCUN1D5	ENSG00000137692.7	0.00201789	0.136832	0.452318	0.00410901	0.00253499	0.696812
ENSG00000157259	GATAD1	ENSG00000157259.6	0.00221966	0.137228	0.45333	0.00138313	0.000884627	0.644792
ENSG00000081307	UBA5	ENSG00000081307.8	0.00273881	0.137558	0.453528	0.00221936	0.00142363	0.64057
ENSG00000163545	NUAK2	ENSG00000163545.7	0.00955149	0.137631	0.453528	0.00403562	0.00159592	1.3384
ENSG00000035141	FAM136A	ENSG00000035141.3	0.00131732	0.13781	0.453528	0.00114634	0.000797938	0.522681
ENSG00000130764	LRRC47	ENSG00000130764.5	0.00258234	0.137837	0.453528	0.00224834	0.0015245	0.560525
ENSG00000126522	ASL	ENSG00000126522.12	0.00377667	0.137884	0.453528	0.00330752	0.00193245	0.77532
ENSG00000174718	KIAA1551	ENSG00000174718.7	0.00412504	0.137992	0.453528	0.00245948	0.00129996	0.91989
ENSG00000198331	HYLS1	ENSG00000198331.6	0.00476512	0.138705	0.45458	0.00491253	0.00272898	0.848104
ENSG00000174306	ZHX3	ENSG00000174306.17	0.00117794	0.138711	0.45458	0.00116543	0.00064696	0.849113
ENSG00000069998	HDHD5	ENSG00000069998.8	0.00353225	0.138853	0.454748	0.00405762	0.00198397	1.03225
ENSG00000101546	RBFA	ENSG00000101546.8	0.00359898	0.139281	0.455328	0.00275329	0.0013816	0.994822
ENSG00000168014	C2CD3	ENSG00000168014.12	0.00216915	0.140221	0.457661	0.00143292	0.000725209	0.982488
ENSG00000121741	ZMYM2	ENSG00000121741.12	0.00347159	0.140997	0.459133	0.00207363	0.00137259	0.595254
ENSG00000115207	GTF3C2	ENSG00000115207.9	0.00103885	0.141105	0.459133	0.00204875	0.00136263	0.588348
ENSG00000014138	POLA2	ENSG00000014138.4	0.00188693	0.141173	0.459133	0.00285193	0.00197036	0.53348
ENSG00000139372	TDG	ENSG00000139372.10	0.00542015	0.141982	0.461315	0.00105319	0.000642999	0.711872
ENSG00000161179	YDJC	ENSG00000161179.9	0.010701	0.142066	0.461441	0.00381265	0.00262251	0.539846
ENSG00000148834	GSTO1	ENSG00000148834.8	0.000998638	0.142169	0.461478	0.00576225	0.00401972	0.519537
ENSG00000255432	ENSG00000255432	ENSG00000255432.1	0.00689097	0.143014	0.463224	0.00629914	0.00424102	0.570745
ENSG00000168538	TRAPPC11	ENSG00000168538.11	0.00305768	0.143374	0.46399	0.00161973	0.0011006	0.557464
ENSG00000198722	UNC13B	ENSG00000198722.8	0.00176667	0.143667	0.464311	0.000553829	0.000121392	2.18977
ENSG00000153767	GTF2E1	ENSG00000153767.5	0.00150213	0.144024	0.4648	0.00218833	0.00128964	0.762866
ENSG00000157184	CPT2	ENSG00000157184.5	0.00169897	0.144079	0.464828	0.00461142	0.00309843	0.573673
ENSG00000113966	ARL6	ENSG00000113966.5	0.00401394	0.144369	0.465201	0.00410046	0.0025834	0.666515
ENSG00000147804	SLC39A4	ENSG00000147804.5	0.013805	0.144737	0.465758	0.021616	0.0122661	0.817424
ENSG00000103202	NME4	ENSG00000103202.8	0.00698253	0.144913	0.466174	0.00443846	0.00261286	0.76443
ENSG00000171161	ZNF672	ENSG00000171161.8	0.00942304	0.145194	0.466793	0.00201141	0.00124369	0.693581
ENSG00000135164	DMTF1	ENSG00000135164.14	0.00426076	0.145338	0.467095	0.00192093	0.00130421	0.558626
ENSG00000184677	ZBTB40	ENSG00000184677.12	0.00103275	0.145396	0.467133	0.00107904	0.000663601	0.701358
ENSG00000258311	ENSG00000258311	ENSG00000258311.1	0.00278389	0.14585	0.467545	0.00901229	0.00535	0.752354
ENSG00000113269	RNF130	ENSG00000113269.9	0.00210495	0.146741	0.468369	0.00405042	0.00265191	0.611039
ENSG00000173020	GRK2	ENSG00000173020.6	0.00635683	0.146901	0.468381	0.00158194	0.000932536	0.762461
ENSG00000129932	DOHH	ENSG00000129932.3	0.0254575	0.147396	0.469571	0.00526906	0.00257851	1.03101
ENSG00000130159	ECSIT	ENSG00000130159.9	0.0046601	0.148001	0.470279	0.00222088	0.00139788	0.667893
ENSG00000152620	NADK2	ENSG00000152620.8	0.0029334	0.148505	0.470838	0.00140355	0.000791939	0.825618
ENSG00000178966	RMI1	ENSG00000178966.11	0.0102544	0.148571	0.470838	0.00603425	0.00371372	0.700308
ENSG00000135801	TAF5L	ENSG00000135801.5	0.00248283	0.14858	0.470838	0.00126574	0.000540402	1.22787
ENSG00000178449	COX14	ENSG00000178449.4	0.00353733	0.148794	0.470838	0.00943872	0.00527596	0.839157
ENSG00000029153	ARNTL2	ENSG00000029153.10	0.0026701	0.150035	0.472832	0.000393448	0.000263677	0.577399
ENSG00000124787	RPP40	ENSG00000124787.9	0.00230857	0.150247	0.473092	0.00352084	0.00214747	0.713281
ENSG00000106692	FKTN	ENSG00000106692.9	0.00356365	0.150688	0.47415	0.000617926	0.000351019	0.815886
ENSG00000143498	TAF1A	ENSG00000143498.13	0.00180383	0.150799	0.474259	0.00219017	0.0014291	0.615931
ENSG00000112511	PHF1	ENSG00000112511.13	0.00565364	0.15126	0.474918	0.0024517	0.00141785	0.790078
ENSG00000162714	ZNF496	ENSG00000162714.8	0.0038404	0.151331	0.474918	0.00101446	0.000559986	0.857245
ENSG00000004866	ST7	ENSG00000004866.14	0.00220346	0.151629	0.47503	0.00497349	0.00322749	0.623845
ENSG00000163319	MRPS18C	ENSG00000163319.6	0.00216966	0.151774	0.475191	0.00310776	0.00207617	0.581949
ENSG00000115526	CHST10	ENSG00000115526.6	0.00197691	0.152357	0.47631	0.00273689	0.00134355	1.02649
ENSG00000099910	KLHL22	ENSG00000099910.12	0.00493458	0.152471	0.47631	0.00676688	0.0040052	0.756617
ENSG00000177951	BET1L	ENSG00000177951.13	0.00403652	0.152683	0.47631	0.0011571	0.000654954	0.821048
ENSG00000185900	POMK	ENSG00000185900.5	0.00366672	0.153212	0.476874	0.00571981	0.0030622	0.901399
ENSG00000138942	RNF185	ENSG00000138942.11	0.00221063	0.153454	0.477332	0.0016322	0.00057284	1.51061
ENSG00000165806	CASP7	ENSG00000165806.15	0.00264679	0.153977	0.478073	0.0012074	0.000803547	0.587454
ENSG00000182606	TRAK1	ENSG00000182606.10	0.00211881	0.154108	0.478103	0.000738942	0.000390829	0.918923
ENSG00000163935	SFMBT1	ENSG00000163935.9	0.00164195	0.154367	0.478615	0.00217236	0.00129086	0.750933
ENSG00000140299	BNIP2	ENSG00000140299.7	0.00384384	0.154667	0.478887	0.00152281	0.000899261	0.759929
ENSG00000198952	SMG5	ENSG00000198952.7	0.00193948	0.155085	0.479084	0.000869129	0.000613331	0.502904
ENSG00000070495	JMJD6	ENSG00000070495.10	0.00120532	0.155186	0.479084	0.00264566	0.00161306	0.713833
ENSG00000103429	BFAR	ENSG00000103429.6	0.00184529	0.155279	0.479084	0.00176988	0.00120915	0.549659
ENSG00000167118	URM1	ENSG00000167118.6	0.00609312	0.155472	0.479084	0.00363042	0.00242706	0.580928
ENSG00000198551	ZNF627	ENSG00000198551.5	0.00473501	0.156345	0.479869	0.00352274	0.00170483	1.04707
ENSG00000107185	RGP1	ENSG00000107185.8	0.00119943	0.156373	0.479869	0.00123156	0.000756273	0.703502
ENSG00000180035	ZNF48	ENSG00000180035.6	0.00612788	0.156414	0.479869	0.00505642	0.00238347	1.08505
ENSG00000068438	FTSJ1	ENSG00000068438.10	0.00371482	0.156628	0.480089	0.00236358	0.00142037	0.734705
ENSG00000212719	C17orf51	ENSG00000212719.6	0.00183118	0.157223	0.48047	0.000949946	0.000569912	0.737107
ENSG00000175482	POLD4	ENSG00000175482.4	0.00743632	0.157329	0.48047	0.00312415	0.00198816	0.652026
ENSG00000130803	ZNF317	ENSG00000130803.10	0.0021217	0.157652	0.48047	0.00145108	0.00083434	0.798418
ENSG00000132623	ANKEF1	ENSG00000132623.11	0.00278659	0.15811	0.481262	0.00219265	0.00137693	0.671222
ENSG00000135709	KIAA0513	ENSG00000135709.8	0.00562694	0.158388	0.481753	0.00271413	0.00155505	0.803525
ENSG00000162062	C16orf59	ENSG00000162062.10	0.0120537	0.158512	0.481753	0.00194711	0.00132576	0.554513
ENSG00000138835	RGS3	ENSG00000138835.18	0.00488728	0.158702	0.481753	0.00275425	0.00191886	0.521411
ENSG00000135763	URB2	ENSG00000135763.5	0.00181868	0.158869	0.481855	0.00325261	0.00213975	0.604155
ENSG00000174173	TRMT10C	ENSG00000174173.6	0.00318559	0.158966	0.481855	0.00448222	0.00306669	0.547534
ENSG00000214194	LINC00998	ENSG00000214194.4	0.00419756	0.159314	0.482157	0.00167888	0.00086161	0.962396
ENSG00000267673	FDX2	ENSG00000267673.2	0.00567183	0.159679	0.482971	0.00397782	0.00166614	1.25547
ENSG00000063176	SPHK2	ENSG00000063176.11	0.0118683	0.15976	0.48307	0.00391123	0.00248862	0.652275
ENSG00000104689	TNFRSF10A	ENSG00000104689.5	0.00264814	0.160795	0.484767	0.00718346	0.00418576	0.77919
ENSG00000162910	MRPL55	ENSG00000162910.14	0.0147867	0.160801	0.484767	0.00628529	0.00424846	0.56504
ENSG00000176871	WSB2	ENSG00000176871.4	0.00133807	0.160993	0.484767	0.000862176	0.000505336	0.77074
ENSG00000102100	SLC35A2	ENSG00000102100.10	0.00316974	0.161028	0.484767	0.00939157	0.0052127	0.849336
ENSG00000130560	UBAC1	ENSG00000130560.4	0.0036544	0.162007	0.486426	0.00247868	0.00172903	0.519608
ENSG00000102103	PQBP1	ENSG00000102103.11	0.00497312	0.162374	0.487171	0.00529862	0.00368747	0.522983
ENSG00000170903	MSANTD4	ENSG00000170903.6	0.00268547	0.162478	0.48726	0.00178515	0.000834219	1.09755
ENSG00000130956	HABP4	ENSG00000130956.9	0.0022447	0.162681	0.48751	0.00282608	0.00119028	1.2475
ENSG00000149591	TAGLN	ENSG00000149591.12	0.00520085	0.162938	0.487989	0.00286631	0.00123138	1.21892
ENSG00000135074	ADAM19	ENSG00000135074.11	0.00252496	0.163046	0.488169	0.00138166	0.000929561	0.571783
ENSG00000139637	C12orf10	ENSG00000139637.9	0.0047896	0.163212	0.488354	0.00515434	0.00337508	0.610867
ENSG00000183530	PRR14L	ENSG00000183530.9	0.00249737	0.163498	0.488492	0.000963618	0.000541657	0.831082
ENSG00000110025	SNX15	ENSG00000110025.8	0.00428969	0.16357	0.488492	0.002147	0.00118311	0.859739
ENSG00000165046	LETM2	ENSG00000165046.8	0.00247283	0.163791	0.488492	0.00164251	0.000872401	0.912835
ENSG00000008324	SS18L2	ENSG00000008324.6	0.00371664	0.163793	0.488492	0.00577224	0.00319569	0.853003
ENSG00000112852	PCDHB2	ENSG00000112852.4	0.00212981	0.164451	0.489753	0.00424439	0.00146701	1.53268
ENSG00000092330	TINF2	ENSG00000092330.11	0.00191428	0.16528	0.491193	0.0018976	0.0010307	0.880548
ENSG00000134480	CCNH	ENSG00000134480.9	0.00647332	0.165535	0.491302	0.00348944	0.00242067	0.527586
ENSG00000021826	CPS1	ENSG00000021826.10	0.00196146	0.165703	0.491302	0.00518606	0.00317253	0.709004
ENSG00000160741	CRTC2	ENSG00000160741.12	0.0052556	0.165831	0.491394	0.00491518	0.00252891	0.958727
ENSG00000244005	NFS1	ENSG00000244005.8	0.00253022	0.166478	0.491901	0.00408877	0.00257746	0.665712
ENSG00000139428	MMAB	ENSG00000139428.7	0.00240691	0.166673	0.492006	0.00317131	0.00177293	0.838946
ENSG00000133703	KRAS	ENSG00000133703.7	0.0033484	0.166809	0.49212	0.00133837	0.000713209	0.90808
ENSG00000101353	MROH8	ENSG00000101353.10	0.0107707	0.166956	0.49237	0.0127542	0.00673205	0.92185
ENSG00000180011	ZADH2	ENSG00000180011.6	0.00187525	0.167858	0.493623	0.00325468	0.00180444	0.850966
ENSG00000083838	ZNF446	ENSG00000083838.11	0.00738083	0.168573	0.49473	0.00139436	0.000823287	0.760135
ENSG00000134265	NAPG	ENSG00000134265.8	0.00264927	0.169381	0.495731	0.00243173	0.00167767	0.535526
ENSG00000170632	ARMC10	ENSG00000170632.9	0.00228979	0.170001	0.496404	0.00205585	0.00127414	0.69021
ENSG00000005075	POLR2J	ENSG00000005075.11	0.00591973	0.170853	0.497203	0.00210388	0.000805244	1.38556
ENSG00000110200	ANAPC15	ENSG00000110200.4	0.00373526	0.171558	0.497957	0.00205296	0.00108564	0.919156
ENSG00000178922	HYI	ENSG00000178922.12	0.00573052	0.171664	0.498122	0.00196052	0.00128578	0.608592
ENSG00000136867	SLC31A2	ENSG00000136867.6	0.0047553	0.172378	0.499474	0.0087748	0.00439952	0.996021
ENSG00000185716	C16orf52	ENSG00000185716.7	0.00371188	0.172498	0.499548	0.00137524	0.00083118	0.726451
ENSG00000073417	PDE8A	ENSG00000073417.10	0.00250096	0.172552	0.499548	0.000783988	0.000242927	1.69031
ENSG00000140471	LINS1	ENSG00000140471.12	0.00328124	0.172974	0.50005	0.00265693	0.00147638	0.847699
ENSG00000127920	GNG11	ENSG00000127920.5	0.00242758	0.174166	0.501773	0.0027619	0.00177054	0.641469
ENSG00000160213	CSTB	ENSG00000160213.5	0.00323241	0.174168	0.501773	0.00383581	0.00254232	0.593384
ENSG00000166886	NAB2	ENSG00000166886.8	0.0104269	0.17483	0.502999	0.00175111	0.00107635	0.702119
ENSG00000136840	ST6GALNAC4	ENSG00000136840.14	0.00953932	0.174843	0.502999	0.00373266	0.00236165	0.660408
ENSG00000177889	UBE2N	ENSG00000177889.5	0.00237975	0.175751	0.504559	0.000770996	0.00054031	0.512936
ENSG00000266173	STRADA	ENSG00000266173.1	0.00132024	0.175786	0.504559	0.00351466	0.00201976	0.799198
ENSG00000197498	RPF2	ENSG00000197498.8	0.00243898	0.176101	0.504885	0.000912139	0.00061268	0.574121
ENSG00000151445	VIPAS39	ENSG00000151445.11	0.00287121	0.177255	0.50623	0.00198468	0.00119446	0.732546
ENSG00000185324	CDK10	ENSG00000185324.17	0.00551953	0.17737	0.506244	0.00230348	0.00135491	0.765622
ENSG00000137275	RIPK1	ENSG00000137275.9	0.00157175	0.178241	0.507156	0.00215406	0.0012711	0.760984
ENSG00000165506	DNAAF2	ENSG00000165506.10	0.00231022	0.17829	0.507156	0.00340396	0.00158616	1.10168
ENSG00000122417	ODF2L	ENSG00000122417.11	0.00270096	0.178542	0.507549	0.00129898	0.000866956	0.583352
ENSG00000172831	CES2	ENSG00000172831.7	0.00498629	0.179126	0.508348	0.00166512	0.000834133	0.997274
ENSG00000187049	TMEM216	ENSG00000187049.5	0.0022405	0.179351	0.508514	0.00274188	0.000907983	1.59443
ENSG00000164031	DNAJB14	ENSG00000164031.12	0.00610594	0.180086	0.509451	0.0010763	0.000591588	0.863412
ENSG00000121905	HPCA	ENSG00000121905.5	0.00409141	0.180168	0.509451	0.00659716	0.00292857	1.17165
ENSG00000183605	SFXN4	ENSG00000183605.12	0.00144145	0.180223	0.509451	0.00335835	0.00232571	0.53008
ENSG00000160957	RECQL4	ENSG00000160957.8	0.00875156	0.180998	0.510353	0.00122227	0.000854217	0.516892
ENSG00000150990	DHX37	ENSG00000150990.3	0.00416248	0.181958	0.51213	0.00122394	0.000842597	0.538616
ENSG00000144048	DUSP11	ENSG00000144048.6	0.00405006	0.181971	0.51213	0.0021201	0.00147948	0.51904
ENSG00000146054	TRIM7	ENSG00000146054.13	0.00416603	0.182865	0.513031	0.00950696	0.00261255	1.86353
ENSG00000174684	B4GAT1	ENSG00000174684.6	0.00426217	0.18324	0.513941	0.0192405	0.0124389	0.62929
ENSG00000064763	FAR2	ENSG00000064763.6	0.00186276	0.183379	0.514151	0.00211797	0.00126207	0.746896
ENSG00000170871	KIAA0232	ENSG00000170871.7	0.00193569	0.183901	0.514648	0.00115902	0.000742979	0.641508
ENSG00000091157	WDR7	ENSG00000091157.9	0.00307888	0.184537	0.515595	0.003354	0.00209996	0.675525
ENSG00000104142	VPS18	ENSG00000104142.6	0.00560555	0.184578	0.515595	0.00316317	0.00201416	0.651194
ENSG00000107643	MAPK8	ENSG00000107643.11	0.00404126	0.184681	0.515595	0.00172978	0.00116193	0.574061
ENSG00000138399	FASTKD1	ENSG00000138399.13	0.00452763	0.184953	0.516156	0.00301873	0.00189857	0.669027
ENSG00000187325	TAF9B	ENSG00000187325.4	0.00451022	0.185341	0.516589	0.00187596	0.00130765	0.520646
ENSG00000242612	DECR2	ENSG00000242612.2	0.008424	0.185416	0.516589	0.00383971	0.00179778	1.09478
ENSG00000167644	C19orf33	ENSG00000167644.7	0.0128771	0.185571	0.516873	0.00632378	0.00328785	0.943642
ENSG00000185947	ZNF267	ENSG00000185947.10	0.0038428	0.185922	0.51757	0.000828237	0.000387896	1.09437
ENSG00000149716	ORAOV1	ENSG00000149716.8	0.00592728	0.186246	0.51786	0.000967154	0.000364969	1.40597
ENSG00000183208	GDPGP1	ENSG00000183208.8	0.0192617	0.186284	0.51786	0.0197291	0.0100663	0.970793
ENSG00000172819	RARG	ENSG00000172819.12	0.00521546	0.186426	0.517944	0.00297489	0.00153468	0.9549
ENSG00000111911	HINT3	ENSG00000111911.5	0.00260384	0.186931	0.517944	0.000919897	0.000561496	0.712197
ENSG00000110422	HIPK3	ENSG00000110422.7	0.0030855	0.18709	0.517961	0.000516832	0.000228844	1.17533
ENSG00000183814	LIN9	ENSG00000183814.11	0.00701338	0.187137	0.517961	0.00307003	0.00119335	1.36323
ENSG00000173542	MOB1B	ENSG00000173542.4	0.00433687	0.187516	0.51814	0.00205305	0.00137708	0.576159
ENSG00000100348	TXN2	ENSG00000100348.5	0.0121507	0.187839	0.518426	0.00421187	0.00253681	0.731444
ENSG00000175352	NRIP3	ENSG00000175352.6	0.00201727	0.187869	0.518426	0.00128935	0.000628417	1.03685
ENSG00000059122	FLYWCH1	ENSG00000059122.12	0.0121876	0.188503	0.519544	0.00453572	0.00294189	0.624585
ENSG00000147471	PROSC	ENSG00000147471.7	0.00142292	0.18854	0.519544	0.00373725	0.00218551	0.774008
ENSG00000158234	FAIM	ENSG00000158234.8	0.00599298	0.189888	0.520692	0.00460884	0.00188419	1.29046
ENSG00000158623	COPG2	ENSG00000158623.10	0.0026224	0.190916	0.522514	0.00633744	0.00389827	0.701066
ENSG00000162129	CLPB	ENSG00000162129.8	0.00192546	0.191132	0.522823	0.00487282	0.00333192	0.548405
ENSG00000143379	SETDB1	ENSG00000143379.8	0.00131814	0.192825	0.524951	0.00217525	0.00149201	0.543926
ENSG00000154928	EPHB1	ENSG00000154928.12	0.00397211	0.194059	0.526822	0.0183611	0.00495731	1.88902
ENSG00000179562	GCC1	ENSG00000179562.2	0.00405385	0.194146	0.526915	0.00248955	0.00128474	0.954409
ENSG00000184428	TOP1MT	ENSG00000184428.8	0.00545129	0.195141	0.528188	0.00216472	0.00140461	0.624008
ENSG00000095564	BTAF1	ENSG00000095564.9	0.00241295	0.195291	0.528191	0.00155048	0.00101979	0.604445
ENSG00000169155	ZBTB43	ENSG00000169155.5	0.00138093	0.195427	0.528191	0.00150794	0.000550018	1.45503
ENSG00000150456	EEF1AKMT1	ENSG00000150456.6	0.00401796	0.195507	0.528191	0.00682124	0.00245087	1.47674
ENSG00000108578	BLMH	ENSG00000108578.10	0.00156463	0.195512	0.528191	0.00358171	0.00240509	0.574556
ENSG00000105926	MPP6	ENSG00000105926.11	0.00268269	0.195578	0.528191	0.0012255	0.000772185	0.666347
ENSG00000072840	EVC	ENSG00000072840.8	0.0044043	0.195919	0.528485	0.000933742	0.000609535	0.615316
ENSG00000077150	NFKB2	ENSG00000077150.13	0.00485885	0.196393	0.52902	0.0035571	0.00199614	0.833487
ENSG00000151718	WWC2	ENSG00000151718.11	0.00159668	0.196813	0.529727	0.00122562	0.000807893	0.601276
ENSG00000087206	UIMC1	ENSG00000087206.12	0.00184898	0.19718	0.529961	0.00182709	0.00111292	0.71519
ENSG00000157764	BRAF	ENSG00000157764.8	0.00198643	0.197194	0.529961	0.000732256	0.000474903	0.624715
ENSG00000184232	OAF	ENSG00000184232.4	0.00943836	0.197563	0.530611	0.00371531	0.00241302	0.622642
ENSG00000224877	NDUFAF8	ENSG00000224877.3	0.00625017	0.197659	0.530729	0.00429288	0.00286061	0.585626
ENSG00000143622	RIT1	ENSG00000143622.6	0.00456425	0.198102	0.531351	0.00244269	0.00155179	0.65453
ENSG00000175548	ALG10B	ENSG00000175548.4	0.00491011	0.198581	0.531589	0.00425905	0.00249619	0.770804
ENSG00000164118	CEP44	ENSG00000164118.8	0.00597497	0.198852	0.531659	0.00169003	0.000864977	0.966312
ENSG00000122042	UBL3	ENSG00000122042.9	0.00283588	0.198917	0.531659	0.00147661	0.000763676	0.951256
ENSG00000243943	ZNF512	ENSG00000243943.5	0.00175817	0.200604	0.534131	0.00382505	0.00233399	0.71268
ENSG00000106344	RBM28	ENSG00000106344.4	0.00154469	0.200643	0.534131	0.00173008	0.00120742	0.518903
ENSG00000133740	E2F5	ENSG00000133740.6	0.00542899	0.201512	0.53494	0.00189696	0.00110888	0.774589
ENSG00000197961	ZNF121	ENSG00000197961.7	0.00251903	0.20164	0.534996	0.00103681	0.000575328	0.849695
ENSG00000254806	SYS1-DBNDD2	ENSG00000254806.1	0.00267849	0.201865	0.535206	0.00787149	0.00507511	0.633197
ENSG00000176396	EID2	ENSG00000176396.9	0.0024353	0.202231	0.535327	0.00429041	0.00292417	0.55309
ENSG00000147457	CHMP7	ENSG00000147457.9	0.00134932	0.204278	0.537043	0.0013544	0.00088814	0.608796
ENSG00000174032	SLC25A30	ENSG00000174032.12	0.00555252	0.204845	0.538107	0.00303439	0.00137424	1.14277
ENSG00000175283	DOLK	ENSG00000175283.7	0.00783	0.205137	0.538107	0.0074179	0.00513438	0.530822
ENSG00000164162	ANAPC10	ENSG00000164162.8	0.00127732	0.205174	0.538107	0.00219939	0.00154347	0.510929
ENSG00000137494	ANKRD42	ENSG00000137494.9	0.00441579	0.207523	0.541319	0.00614472	0.00195829	1.64975
ENSG00000108406	DHX40	ENSG00000108406.5	0.00532363	0.207838	0.541319	0.00139107	0.000826704	0.750749
ENSG00000174013	FBXO45	ENSG00000174013.7	0.00229242	0.207893	0.541319	0.000554268	0.000262642	1.07749
ENSG00000204344	STK19	ENSG00000204344.10	0.00189628	0.208018	0.541386	0.00536378	0.00275626	0.960541
ENSG00000238227	C9orf69	ENSG00000238227.3	0.00916542	0.208041	0.541386	0.00233367	0.00133842	0.802065
ENSG00000181904	C5orf24	ENSG00000181904.8	0.00320873	0.208154	0.541436	0.00142361	0.000991661	0.521632
ENSG00000005020	SKAP2	ENSG00000005020.8	0.00323452	0.208585	0.542042	0.00291398	0.00192682	0.596771
ENSG00000272617	COG8	ENSG00000272617.1	0.00241051	0.208722	0.542042	0.00208621	0.00111439	0.904626
ENSG00000137944	KYAT3	ENSG00000137944.12	0.00325303	0.208732	0.542042	0.00247044	0.00164785	0.584186
ENSG00000166750	SLFN5	ENSG00000166750.5	0.00193138	0.208917	0.542162	0.00228144	0.00139897	0.705577
ENSG00000126368	NR1D1	ENSG00000126368.5	0.00622935	0.209674	0.543005	0.00733157	0.00442243	0.729283
ENSG00000117280	RAB29	ENSG00000117280.8	0.0022962	0.2102	0.543957	0.0012996	0.000645938	1.0086
ENSG00000184281	TSSC4	ENSG00000184281.10	0.0120505	0.210311	0.543957	0.00167276	0.00116125	0.526554
ENSG00000100065	CARD10	ENSG00000100065.10	0.00750618	0.210368	0.543965	0.00299636	0.00163318	0.875526
ENSG00000093167	LRRFIP2	ENSG00000093167.13	0.00135061	0.210587	0.544221	0.00274986	0.00185432	0.568469
ENSG00000072121	ZFYVE26	ENSG00000072121.11	0.00143522	0.210738	0.544221	0.00180822	0.00121434	0.574393
ENSG00000103091	WDR59	ENSG00000103091.10	0.00376246	0.211191	0.544555	0.00289062	0.00174112	0.731363
ENSG00000127952	STYXL1	ENSG00000127952.12	0.00150208	0.212063	0.54532	0.00370538	0.00249013	0.573402
ENSG00000126767	ELK1	ENSG00000126767.13	0.00533196	0.212497	0.545824	0.0015079	0.000981281	0.619806
ENSG00000179151	EDC3	ENSG00000179151.7	0.00992144	0.212886	0.546544	0.00385581	0.00251228	0.618035
ENSG00000147400	CETN2	ENSG00000147400.8	0.0023436	0.2135	0.547599	0.00269192	0.00151316	0.831075
ENSG00000142444	TIMM29	ENSG00000142444.6	0.00428014	0.214378	0.549204	0.0037204	0.00249105	0.578706
ENSG00000186871	ERCC6L	ENSG00000186871.5	0.00375348	0.214741	0.549243	0.002084	0.001099	0.923161
ENSG00000189376	C8orf76	ENSG00000189376.7	0.00219763	0.215102	0.549243	0.00452763	0.00311096	0.541397
ENSG00000125454	SLC25A19	ENSG00000125454.7	0.00140542	0.215791	0.549243	0.0027915	0.00146005	0.935025
ENSG00000136819	C9orf78	ENSG00000136819.10	0.00179516	0.21621	0.549891	0.00215834	0.00147345	0.550719
ENSG00000172086	KRCC1	ENSG00000172086.7	0.00298574	0.217074	0.551124	0.00173753	0.000915855	0.923843
ENSG00000173653	RCE1	ENSG00000173653.3	0.00736684	0.217288	0.551124	0.0053621	0.00316777	0.75933
ENSG00000198001	IRAK4	ENSG00000198001.9	0.00393291	0.218433	0.552319	0.00151676	0.000819098	0.888886
ENSG00000214113	LYRM4	ENSG00000214113.6	0.00141616	0.218704	0.552446	0.0019812	0.00106592	0.894279
ENSG00000124164	VAPB	ENSG00000124164.11	0.00146439	0.218861	0.552446	0.00274233	0.00184984	0.568006
ENSG00000114656	KIAA1257	ENSG00000114656.6	0.00386262	0.21919	0.553139	0.00903065	0.00445684	1.01881
ENSG00000136052	SLC41A2	ENSG00000136052.5	0.00628034	0.219338	0.553373	0.00195687	0.000750664	1.38231
ENSG00000257093	KIAA1147	ENSG00000257093.2	0.0019213	0.220044	0.554042	0.00107617	0.000694355	0.632156
ENSG00000100568	VTI1B	ENSG00000100568.6	0.00217416	0.220334	0.554497	0.00128285	0.000858664	0.579183
ENSG00000181817	LSM10	ENSG00000181817.5	0.0196279	0.220776	0.554899	0.0016226	0.00108596	0.579347
ENSG00000111215	PRR4	ENSG00000111215.7	0.00535687	0.222221	0.556086	0.00428927	0.00222253	0.948527
ENSG00000178295	GEN1	ENSG00000178295.10	0.00355329	0.222235	0.556086	0.0023071	0.00156194	0.562743
ENSG00000120925	RNF170	ENSG00000120925.9	0.003553	0.222961	0.556704	0.00337962	0.00197531	0.774787
ENSG00000185798	WDR53	ENSG00000185798.6	0.00302336	0.223175	0.556797	0.00336894	0.00188127	0.840588
ENSG00000129696	TTI2	ENSG00000129696.8	0.0169263	0.223629	0.557327	0.00196422	0.00109564	0.842179
ENSG00000198680	TUSC1	ENSG00000198680.3	0.00363631	0.22532	0.559218	0.00408713	0.0025327	0.690412
ENSG00000105656	ELL	ENSG00000105656.8	0.0051848	0.226287	0.560375	0.00269378	0.00166284	0.695985
ENSG00000165752	STK32C	ENSG00000165752.12	0.00402176	0.226754	0.560814	0.00791146	0.0051837	0.609961
ENSG00000054965	FAM168A	ENSG00000054965.6	0.00249244	0.226854	0.560814	0.00150814	0.00101565	0.570366
ENSG00000135870	RC3H1	ENSG00000135870.7	0.00221757	0.227101	0.561223	0.00103831	0.000564041	0.880371
ENSG00000131437	KIF3A	ENSG00000131437.11	0.00246467	0.228144	0.562696	0.00312843	0.00217451	0.52475
ENSG00000171169	NAIF1	ENSG00000171169.8	0.00355911	0.228278	0.562696	0.00257239	0.00130888	0.97478
ENSG00000148484	RSU1	ENSG00000148484.13	0.00118357	0.228499	0.562696	0.00387832	0.0025868	0.584264
ENSG00000228300	C19orf24	ENSG00000228300.9	0.0138186	0.229606	0.563604	0.00584108	0.00408983	0.514193
ENSG00000188368	PRR19	ENSG00000188368.5	0.00713046	0.23118	0.566177	0.00781877	0.00493153	0.664906
ENSG00000065060	UHRF1BP1	ENSG00000065060.12	0.0018294	0.231743	0.566981	0.000994254	0.000590724	0.75113
ENSG00000160767	FAM189B	ENSG00000160767.16	0.0134537	0.233407	0.569464	0.00575205	0.00323731	0.829279
ENSG00000198089	SFI1	ENSG00000198089.10	0.00180363	0.234112	0.570355	0.00202358	0.000852931	1.24641
ENSG00000184992	BRI3BP	ENSG00000184992.10	0.00216088	0.234823	0.571671	0.00136784	0.000671143	1.02721
ENSG00000106153	CHCHD2	ENSG00000106153.12	0.00268057	0.235337	0.571762	0.00161798	0.00109021	0.569584
ENSG00000104973	MED25	ENSG00000104973.10	0.00747496	0.235673	0.571762	0.00777598	0.00543832	0.515862
ENSG00000148572	NRBF2	ENSG00000148572.10	0.00326973	0.236422	0.571994	0.00114058	0.000708679	0.686565
ENSG00000163885	CFAP100	ENSG00000163885.7	0.00561693	0.236433	0.571994	0.406322	0.274399	0.566345
ENSG00000187695	ENSG00000187695	ENSG00000187695.6	0.00308394	0.237037	0.572494	0.00779863	0.00394285	0.983982
ENSG00000083937	CHMP2B	ENSG00000083937.4	0.00418009	0.237542	0.572645	0.0018639	0.00121752	0.614371
ENSG00000170113	NIPA1	ENSG00000170113.11	0.00241296	0.238396	0.574261	0.0015251	0.000967574	0.656457
ENSG00000128699	ORMDL1	ENSG00000128699.9	0.00339088	0.23871	0.574742	0.0033869	0.00231738	0.547474
ENSG00000152127	MGAT5	ENSG00000152127.4	0.00125914	0.238982	0.5749	0.00133461	0.000880001	0.600844
ENSG00000128989	ARPP19	ENSG00000128989.6	0.00496992	0.240063	0.576322	0.000442681	0.000297748	0.572172
ENSG00000136158	SPRY2	ENSG00000136158.6	0.00160372	0.241499	0.57835	0.00124779	0.000817406	0.610248
ENSG00000173581	CCDC106	ENSG00000173581.3	0.0126398	0.241567	0.57835	0.00282458	0.00154885	0.866842
ENSG00000102572	STK24	ENSG00000102572.10	0.00121481	0.242564	0.579724	0.00146621	0.000894181	0.713453
ENSG00000121989	ACVR2A	ENSG00000121989.10	0.00429594	0.243254	0.580504	0.00319112	0.00217701	0.551717
ENSG00000197728	RPS26	ENSG00000197728.5	0.00410572	0.243856	0.581018	0.00364477	0.00238828	0.609858
ENSG00000146386	ABRACL	ENSG00000146386.7	0.00366188	0.24434	0.581414	0.00217523	0.00125184	0.79712
ENSG00000197375	SLC22A5	ENSG00000197375.8	0.00183116	0.244946	0.581414	0.00322202	0.0019188	0.747759
ENSG00000136371	MTHFS	ENSG00000136371.5	0.00165202	0.24546	0.581921	0.00573286	0.00380876	0.589931
ENSG00000169288	MRPL1	ENSG00000169288.13	0.00362483	0.245882	0.582127	0.00234348	0.00156715	0.580507
ENSG00000239732	TLR9	ENSG00000239732.2	0.00415833	0.247352	0.58396	0.00449038	0.00316357	0.505282
ENSG00000113971	NPHP3	ENSG00000113971.14	0.00201743	0.248751	0.585203	0.00228943	0.00154511	0.567278
ENSG00000166450	PRTG	ENSG00000166450.8	0.00770975	0.249061	0.585543	0.00380122	0.0013364	1.50811
ENSG00000182224	CYB5D1	ENSG00000182224.7	0.00271152	0.249534	0.585543	0.00141444	0.000559108	1.33903
ENSG00000137720	C11orf1	ENSG00000137720.3	0.0025023	0.24992	0.585821	0.00615575	0.00372336	0.725329
ENSG00000077264	PAK3	ENSG00000077264.10	0.00256014	0.249944	0.585821	0.0029004	0.00139432	1.05669
ENSG00000008083	JARID2	ENSG00000008083.9	0.00196817	0.250517	0.58648	0.000938315	0.000609626	0.622148
ENSG00000185651	UBE2L3	ENSG00000185651.10	0.00167356	0.250951	0.586836	0.00136162	0.000863742	0.656655
ENSG00000130717	UCK1	ENSG00000130717.8	0.00704808	0.251156	0.586887	0.00207235	0.00119857	0.789949
ENSG00000136319	TTC5	ENSG00000136319.7	0.00268667	0.251856	0.587841	0.00185335	0.00108887	0.767306
ENSG00000151338	MIPOL1	ENSG00000151338.14	0.0042148	0.25233	0.58881	0.0014461	0.000841348	0.781396
ENSG00000116030	SUMO1	ENSG00000116030.12	0.00379187	0.253005	0.5897	0.000876464	0.000599374	0.548239
ENSG00000168283	BMI1	ENSG00000168283.9	0.00363907	0.253236	0.589962	0.000855318	0.000557496	0.6175
ENSG00000127989	MTERF1	ENSG00000127989.9	0.00305946	0.25412	0.590523	0.00146363	0.00102847	0.509055
ENSG00000225830	ERCC6	ENSG00000225830.6	0.00271948	0.254294	0.590791	0.00250257	0.00161457	0.632263
ENSG00000115520	COQ10B	ENSG00000115520.4	0.003201	0.254442	0.590883	0.00318157	0.00222013	0.519093
ENSG00000116922	C1orf109	ENSG00000116922.10	0.00190399	0.254772	0.591083	0.00217784	0.00130105	0.743217
ENSG00000185453	C19orf68	ENSG00000185453.8	0.0335636	0.256212	0.59224	0.0133994	0.00365726	1.87333
ENSG00000173875	ZNF791	ENSG00000173875.9	0.00542388	0.257045	0.593213	0.00207113	0.00110052	0.912234
ENSG00000186106	ANKRD46	ENSG00000186106.7	0.00587919	0.258285	0.595572	0.00393121	0.0020797	0.918593
ENSG00000212127	TAS2R14	ENSG00000212127.5	0.00560186	0.258304	0.595572	0.00637695	0.00328593	0.956567
ENSG00000183617	MRPL54	ENSG00000183617.4	0.0076933	0.258623	0.596143	0.00669415	0.00441675	0.599914
ENSG00000167985	SDHAF2	ENSG00000167985.2	0.00170401	0.259015	0.596664	0.00337967	0.00227687	0.56983
ENSG00000137177	KIF13A	ENSG00000137177.14	0.00110529	0.259267	0.596971	0.000919133	0.00056763	0.695324
ENSG00000159479	MED8	ENSG00000159479.12	0.00163913	0.260322	0.598307	0.00184647	0.00128186	0.526526
ENSG00000171621	SPSB1	ENSG00000171621.9	0.0118455	0.26054	0.598534	0.00389457	0.00221214	0.816023
ENSG00000128016	ZFP36	ENSG00000128016.4	0.00799312	0.261067	0.598986	0.00755835	0.00500682	0.594176
ENSG00000185305	ARL15	ENSG00000185305.6	0.00470231	0.261172	0.598986	0.0037393	0.00202459	0.88514
ENSG00000099364	FBXL19	ENSG00000099364.12	0.0147018	0.261957	0.599394	0.0018346	0.00121165	0.598492
ENSG00000100429	HDAC10	ENSG00000100429.13	0.00744761	0.262609	0.600275	0.00675837	0.0046611	0.536005
ENSG00000185869	ZNF829	ENSG00000185869.9	0.00476458	0.26318	0.601034	0.00128056	0.000796869	0.684356
ENSG00000120963	ZNF706	ENSG00000120963.7	0.00364479	0.263758	0.601673	0.00252705	0.00166701	0.600191
ENSG00000131149	GSE1	ENSG00000131149.13	0.00315283	0.264146	0.602249	0.00224736	0.00120702	0.896779
ENSG00000102805	CLN5	ENSG00000102805.9	0.00305716	0.264152	0.602249	0.00401943	0.00241326	0.73601
ENSG00000162227	TAF6L	ENSG00000162227.3	0.00268464	0.265287	0.603518	0.00447988	0.00202761	1.14368
ENSG00000196715	VKORC1L1	ENSG00000196715.5	0.00194865	0.265397	0.603555	0.00236037	0.00152882	0.626594
ENSG00000117479	SLC19A2	ENSG00000117479.8	0.00368843	0.265483	0.603555	0.00303921	0.00188331	0.690423
ENSG00000158062	UBXN11	ENSG00000158062.16	0.00387637	0.265934	0.604173	0.00118394	0.000681065	0.797728
ENSG00000182218	HHIPL1	ENSG00000182218.5	0.0488203	0.267754	0.606117	10.4735	6.65466	0.654306
ENSG00000103707	MTFMT	ENSG00000103707.5	0.00189283	0.268304	0.606259	0.00211496	0.00130815	0.693096
ENSG00000165490	DDIAS	ENSG00000165490.8	0.00471593	0.268453	0.606259	0.000906933	0.000557439	0.702182
ENSG00000137413	TAF8	ENSG00000137413.11	0.00207166	0.268475	0.606259	0.00239568	0.00167205	0.518813
ENSG00000163623	NKX6-1	ENSG00000163623.5	0.00564088	0.26929	0.606741	0.00263253	0.00114096	1.2062
ENSG00000160753	RUSC1	ENSG00000160753.11	0.00329391	0.269444	0.606741	0.00296265	0.00173303	0.773588
ENSG00000135636	DYSF	ENSG00000135636.9	0.00686178	0.269635	0.606741	0.00303013	0.00145497	1.05839
ENSG00000171466	ZNF562	ENSG00000171466.5	0.00384482	0.269921	0.606792	0.000454288	0.000186643	1.28333
ENSG00000070423	RNF126	ENSG00000070423.13	0.0105845	0.270055	0.606825	0.00410728	0.00286149	0.521415
ENSG00000164219	PGGT1B	ENSG00000164219.5	0.00128231	0.272096	0.609653	0.00123758	0.000697057	0.828171
ENSG00000103351	CLUAP1	ENSG00000103351.8	0.0045494	0.272264	0.609653	0.00324917	0.00176414	0.881105
ENSG00000165288	BRWD3	ENSG00000165288.10	0.00310066	0.272866	0.609905	0.0011988	0.000827422	0.534894
ENSG00000164332	UBLCP1	ENSG00000164332.6	0.00367437	0.273258	0.610209	0.00317395	0.00218243	0.540343
ENSG00000078124	ACER3	ENSG00000078124.7	0.00376256	0.273383	0.610354	0.00143662	0.000680073	1.07892
ENSG00000028310	BRD9	ENSG00000028310.13	0.00109394	0.274701	0.610993	0.00159619	0.000963393	0.728433
ENSG00000172428	COPS9	ENSG00000172428.6	0.00463267	0.27537	0.61194	0.004607	0.00273476	0.752414
ENSG00000174010	KLHL15	ENSG00000174010.9	0.00299499	0.27592	0.612487	0.00161784	0.000896908	0.851033
ENSG00000146733	PSPH	ENSG00000146733.9	0.00305823	0.277959	0.61525	0.00145811	0.000956731	0.607911
ENSG00000151247	EIF4E	ENSG00000151247.8	0.00527456	0.2784	0.615531	0.00123267	0.000591093	1.06032
ENSG00000123179	EBPL	ENSG00000123179.9	0.00430035	0.278735	0.615883	0.00543135	0.00378214	0.522109
ENSG00000143751	SDE2	ENSG00000143751.9	0.00255458	0.27937	0.616476	0.00155634	0.00105216	0.564806
ENSG00000126822	PLEKHG3	ENSG00000126822.11	0.00299905	0.279834	0.616823	0.00227922	0.00105633	1.10948
ENSG00000131791	PRKAB2	ENSG00000131791.6	0.00305042	0.280038	0.617003	0.000976968	0.000617753	0.66128
ENSG00000185085	INTS5	ENSG00000185085.2	0.0047278	0.280376	0.617106	0.00315221	0.00212329	0.570061
ENSG00000048405	ZNF800	ENSG00000048405.5	0.0022461	0.282423	0.619815	0.00248434	0.00155012	0.680484
ENSG00000167700	MFSD3	ENSG00000167700.4	0.0177398	0.283227	0.621039	0.00419029	0.00258482	0.696988
ENSG00000170855	TRIAP1	ENSG00000170855.3	0.00332796	0.283362	0.621065	0.00240675	0.00142235	0.758807
ENSG00000180098	TRNAU1AP	ENSG00000180098.5	0.00182312	0.285017	0.623471	0.00361413	0.00237051	0.60845
ENSG00000156958	GALK2	ENSG00000156958.10	0.00360062	0.286554	0.625068	0.00356909	0.00236876	0.591424
ENSG00000182541	LIMK2	ENSG00000182541.13	0.00262316	0.286658	0.625068	0.0015237	0.000998654	0.609525
ENSG00000166971	AKTIP	ENSG00000166971.12	0.00529903	0.287851	0.626249	0.00237037	0.00141675	0.742527
ENSG00000135974	C2orf49	ENSG00000135974.5	0.00188822	0.287852	0.626249	0.00140995	0.000972493	0.535888
ENSG00000147535	PLPP5	ENSG00000147535.12	0.00303483	0.287873	0.626249	0.00286259	0.00187315	0.611857
ENSG00000140830	TXNL4B	ENSG00000140830.4	0.00180115	0.288392	0.62666	0.00167031	0.00111697	0.580526
ENSG00000022267	FHL1	ENSG00000022267.12	0.00163866	0.288549	0.626731	0.0056066	0.0039603	0.501514
ENSG00000141448	GATA6	ENSG00000141448.4	0.00224755	0.289272	0.627462	0.00946791	0.00626108	0.596633
ENSG00000132003	ZSWIM4	ENSG00000132003.5	0.00785753	0.289904	0.627615	0.0041763	0.00277255	0.591012
ENSG00000109576	AADAT	ENSG00000109576.9	0.00464825	0.290362	0.628202	0.00216335	0.00066765	1.69611
ENSG00000058091	CDK14	ENSG00000058091.12	0.00277083	0.290902	0.628695	0.000837823	0.000461292	0.860965
ENSG00000166822	TMEM170A	ENSG00000166822.8	0.00436371	0.291593	0.629573	0.00137652	0.000777767	0.823613
ENSG00000133678	TMEM254	ENSG00000133678.9	0.00615969	0.291721	0.629654	0.005965	0.00292255	1.0293
ENSG00000156873	PHKG2	ENSG00000156873.11	0.00354467	0.292019	0.629753	0.00277447	0.00192135	0.530091
ENSG00000149483	TMEM138	ENSG00000149483.7	0.00135268	0.292764	0.629892	0.00609461	0.00371915	0.712563
ENSG00000127191	TRAF2	ENSG00000127191.13	0.00724741	0.294758	0.631544	0.00492338	0.003328	0.564996
ENSG00000185344	ATP6V0A2	ENSG00000185344.9	0.00140852	0.294811	0.631544	0.00343154	0.00218165	0.653438
ENSG00000124766	SOX4	ENSG00000124766.4	0.00208872	0.294986	0.631691	0.00322656	0.00199099	0.696512
ENSG00000196628	TCF4	ENSG00000196628.9	0.00425564	0.295678	0.632629	0.000825548	0.000537178	0.619951
ENSG00000065029	ZNF76	ENSG00000065029.10	0.00309747	0.296556	0.633623	0.0019157	0.00128072	0.580924
ENSG00000152942	RAD17	ENSG00000152942.14	0.0023253	0.297012	0.633623	0.000660917	0.000463625	0.511512
ENSG00000188786	MTF1	ENSG00000188786.9	0.00206525	0.29702	0.633623	0.00143826	0.000745251	0.94853
ENSG00000164366	CCDC127	ENSG00000164366.3	0.00273646	0.298232	0.634593	0.0034369	0.00153934	1.1588
ENSG00000169019	COMMD8	ENSG00000169019.9	0.0070368	0.298967	0.635741	0.00349418	0.00207428	0.752347
ENSG00000164164	OTUD4	ENSG00000164164.11	0.00250975	0.29915	0.635741	0.000801844	0.000479868	0.740684
ENSG00000145545	SRD5A1	ENSG00000145545.7	0.00322562	0.3007	0.637287	0.00131872	0.000884464	0.576259
ENSG00000124120	TTPAL	ENSG00000124120.6	0.00128551	0.302632	0.638654	0.000584545	0.000378414	0.627348
ENSG00000118197	DDX59	ENSG00000118197.9	0.00216236	0.302842	0.638765	0.00281139	0.00160723	0.806702
ENSG00000119042	SATB2	ENSG00000119042.12	0.00296082	0.304767	0.640959	0.00282269	0.00192911	0.549135
ENSG00000118600	TMEM5	ENSG00000118600.7	0.00217113	0.30687	0.642597	0.00149943	0.00101526	0.562565
ENSG00000170989	S1PR1	ENSG00000170989.8	0.00166899	0.307348	0.642985	0.0045877	0.00304657	0.590584
ENSG00000002330	BAD	ENSG00000002330.9	0.00946274	0.308254	0.643811	0.00296514	0.00181312	0.70962
ENSG00000105647	PIK3R2	ENSG00000105647.10	0.0055098	0.308823	0.644416	0.00307429	0.00177318	0.793919
ENSG00000156983	BRPF1	ENSG00000156983.11	0.00290176	0.312215	0.647518	0.00166801	0.00113409	0.556588
ENSG00000007341	ST7L	ENSG00000007341.14	0.00142099	0.312665	0.648231	0.00328093	0.00169632	0.951693
ENSG00000142082	SIRT3	ENSG00000142082.10	0.00615874	0.316878	0.651075	0.0020918	0.00104892	0.995839
ENSG00000167384	ZNF180	ENSG00000167384.6	0.00574714	0.318427	0.652027	0.00146218	0.00076157	0.941069
ENSG00000119616	FCF1	ENSG00000119616.7	0.00407892	0.318469	0.652027	0.00232854	0.00163706	0.508318
ENSG00000204160	ZDHHC18	ENSG00000204160.7	0.00445691	0.319826	0.653648	0.00328781	0.00197535	0.735018
ENSG00000133119	RFC3	ENSG00000133119.8	0.00429578	0.322098	0.656014	0.00261847	0.00176206	0.571462
ENSG00000089048	ESF1	ENSG00000089048.10	0.00439349	0.322923	0.656624	0.00107673	0.000717146	0.586319
ENSG00000075643	MOCOS	ENSG00000075643.5	0.00207772	0.323904	0.657405	0.00190446	0.00112007	0.765784
ENSG00000196584	XRCC2	ENSG00000196584.2	0.00254379	0.324131	0.657733	0.00116882	0.000657978	0.828942
ENSG00000196655	TRAPPC4	ENSG00000196655.5	0.00233983	0.324622	0.658332	0.00423351	0.00295004	0.521118
ENSG00000141570	CBX8	ENSG00000141570.6	0.00821044	0.325015	0.658688	0.00605348	0.0042476	0.511118
ENSG00000198783	ZNF830	ENSG00000198783.4	0.00207896	0.32534	0.658859	0.00294375	0.00122841	1.26087
ENSG00000154743	TSEN2	ENSG00000154743.13	0.00340086	0.325927	0.659516	0.00212126	0.000992582	1.09567
ENSG00000124151	NCOA3	ENSG00000124151.14	0.00214874	0.327604	0.661593	0.00116646	0.000799854	0.544332
ENSG00000109787	KLF3	ENSG00000109787.8	0.0026863	0.328731	0.662622	0.00208582	0.00118058	0.82112
ENSG00000110427	KIAA1549L	ENSG00000110427.10	0.00380582	0.328976	0.662757	0.00172213	0.000631931	1.44636
ENSG00000134146	DPH6	ENSG00000134146.7	0.00245509	0.330566	0.664164	0.00574462	0.00332158	0.790341
ENSG00000172296	SPTLC3	ENSG00000172296.8	0.00640647	0.330598	0.664164	0.00643404	0.00421261	0.61101
ENSG00000073350	LLGL2	ENSG00000073350.9	0.00538659	0.332697	0.665995	0.0114986	0.00710342	0.694866
ENSG00000005469	CROT	ENSG00000005469.7	0.00495988	0.333711	0.666429	0.00377107	0.00266001	0.503542
ENSG00000175137	SH3BP5L	ENSG00000175137.9	0.00530212	0.335308	0.668557	0.00170751	0.0011165	0.612919
ENSG00000162415	ZSWIM5	ENSG00000162415.6	0.00526922	0.335543	0.668761	0.00653581	0.0034293	0.930452
ENSG00000164070	HSPA4L	ENSG00000164070.7	0.00291451	0.336773	0.669887	0.00151692	0.00105142	0.528804
ENSG00000084693	AGBL5	ENSG00000084693.11	0.00305642	0.337681	0.670832	0.000733981	0.000415984	0.819215
ENSG00000101473	ACOT8	ENSG00000101473.12	0.00136095	0.337942	0.670832	0.00309184	0.0020753	0.575145
ENSG00000122870	BICC1	ENSG00000122870.7	0.00201365	0.338114	0.670832	0.000986442	0.000564084	0.806323
ENSG00000077514	POLD3	ENSG00000077514.4	0.00197537	0.341777	0.67335	0.0010138	0.000684304	0.567062
ENSG00000165609	NUDT5	ENSG00000165609.8	0.00163673	0.342564	0.673887	0.00414751	0.00290166	0.515368
ENSG00000255835	ENSG00000255835	ENSG00000255835.1	0.0054474	0.343512	0.673887	0.00889507	0.00602585	0.561842
ENSG00000003509	NDUFAF7	ENSG00000003509.11	0.0028405	0.343928	0.673887	0.00253164	0.00148978	0.764976
ENSG00000167394	ZNF668	ENSG00000167394.8	0.0108493	0.345987	0.674994	0.00428432	0.00216016	0.987926
ENSG00000154832	CXXC1	ENSG00000154832.10	0.0043641	0.346125	0.674994	0.00205732	0.00136015	0.596998
ENSG00000165572	KBTBD6	ENSG00000165572.6	0.00554571	0.346126	0.674994	0.00139099	0.000866898	0.682182
ENSG00000131263	RLIM	ENSG00000131263.8	0.00315258	0.346916	0.675513	0.000586134	0.000394897	0.569754
ENSG00000104450	SPAG1	ENSG00000104450.8	0.00458355	0.348299	0.676379	0.00186698	0.00111012	0.749982
ENSG00000159423	ALDH4A1	ENSG00000159423.12	0.0050216	0.348805	0.67697	0.0058071	0.00408942	0.505922
ENSG00000142330	CAPN10	ENSG00000142330.15	0.00789617	0.349192	0.677589	0.00176873	0.000913209	0.953699
ENSG00000153179	RASSF3	ENSG00000153179.7	0.00191257	0.350823	0.678169	0.00139069	0.000770323	0.852271
ENSG00000112208	BAG2	ENSG00000112208.10	0.00375372	0.351174	0.678169	0.00206416	0.0014303	0.529233
ENSG00000100207	TCF20	ENSG00000100207.14	0.00137638	0.351314	0.678178	0.000837574	0.00058875	0.508563
ENSG00000134056	MRPS36	ENSG00000134056.7	0.00676547	0.352529	0.679825	0.00632059	0.00414889	0.607333
ENSG00000144583	2017-03-04	ENSG00000144583.4	0.00270533	0.353734	0.681131	0.00169774	0.00112962	0.587768
ENSG00000182534	MXRA7	ENSG00000182534.9	0.00107297	0.357404	0.685415	0.000487779	0.000308505	0.660934
ENSG00000169740	ZNF32	ENSG00000169740.9	0.00217263	0.357978	0.685914	0.00239972	0.00162112	0.565875
ENSG00000116604	MEF2D	ENSG00000116604.13	0.00430858	0.359998	0.688213	0.00289308	0.00197246	0.552613
ENSG00000115129	TP53I3	ENSG00000115129.9	0.0039847	0.362431	0.691028	0.00359864	0.00231814	0.634485
ENSG00000135953	MFSD9	ENSG00000135953.6	0.00451834	0.362794	0.691454	0.0033158	0.00188978	0.811143
ENSG00000028839	TBPL1	ENSG00000028839.5	0.00397124	0.364141	0.69235	0.00249082	0.00163264	0.609416
ENSG00000121270	ABCC11	ENSG00000121270.11	0.0343968	0.365307	0.69269	0.00588341	0.003631	0.696286
ENSG00000160256	FAM207A	ENSG00000160256.8	0.020008	0.365435	0.69269	0.00305679	0.00186528	0.712627
ENSG00000120992	LYPLA1	ENSG00000120992.13	0.00671724	0.367815	0.694847	0.00040581	0.000266479	0.606785
ENSG00000174446	SNAPC5	ENSG00000174446.8	0.00224644	0.368955	0.696216	0.00196212	0.0012902	0.604813
ENSG00000103199	ZNF500	ENSG00000103199.9	0.00423319	0.369376	0.696517	0.00200025	0.00135674	0.560035
ENSG00000181061	HIGD1A	ENSG00000181061.9	0.00412517	0.369497	0.696553	0.000407076	0.000200809	1.01947
ENSG00000268133	ENSG00000268133	ENSG00000268133.1	0.00320734	0.370416	0.697534	0.00723203	0.00482477	0.583941
ENSG00000169684	CHRNA5	ENSG00000169684.9	0.00169179	0.374533	0.70135	0.00573803	0.00342775	0.743293
ENSG00000172301	COPRS	ENSG00000172301.6	0.00332846	0.374934	0.701581	0.0011889	0.000821622	0.533082
ENSG00000162337	LRP5	ENSG00000162337.7	0.00232984	0.375509	0.702136	0.00784713	0.00387299	1.01872
ENSG00000122490	PQLC1	ENSG00000122490.14	0.00612038	0.376341	0.702477	0.00233079	0.00069584	1.74399
ENSG00000129173	E2F8	ENSG00000129173.8	0.00391562	0.377761	0.702849	0.00280797	0.00126268	1.15304
ENSG00000168818	STX18	ENSG00000168818.5	0.00169393	0.378303	0.70339	0.00198729	0.00116331	0.772567
ENSG00000169871	TRIM56	ENSG00000169871.8	0.0105537	0.380903	0.70554	0.00266042	0.00187848	0.502087
ENSG00000120910	PPP3CC	ENSG00000120910.10	0.00223196	0.386634	0.709887	0.00283867	0.00191577	0.567287
ENSG00000064652	SNX24	ENSG00000064652.6	0.00397984	0.387778	0.710321	0.00199003	0.00112958	0.817001
ENSG00000168275	COA6	ENSG00000168275.10	0.00248131	0.387817	0.710321	0.00460704	0.00300307	0.617402
ENSG00000140043	PTGR2	ENSG00000140043.7	0.00429709	0.388127	0.710321	0.003266	0.00210014	0.637041
ENSG00000162959	MEMO1	ENSG00000162959.9	0.0024412	0.388564	0.71045	0.00199086	0.00113625	0.809118
ENSG00000076685	NT5C2	ENSG00000076685.14	0.00231784	0.391627	0.712318	0.00134673	0.000948158	0.506259
ENSG00000172594	SMPDL3A	ENSG00000172594.8	0.00276738	0.391657	0.712318	0.00623107	0.00393903	0.66164
ENSG00000188243	COMMD6	ENSG00000188243.8	0.00303852	0.394968	0.71412	0.0043095	0.00257029	0.745592
ENSG00000125482	TTF1	ENSG00000125482.8	0.00290139	0.39546	0.714753	0.00141249	0.00097834	0.529835
ENSG00000134046	MBD2	ENSG00000134046.7	0.00373119	0.397067	0.716627	0.00120241	0.000724147	0.731579
ENSG00000101417	PXMP4	ENSG00000101417.7	0.00441534	0.398037	0.717508	0.00779045	0.00503787	0.628892
ENSG00000103245	NARFL	ENSG00000103245.9	0.00664428	0.3992	0.717636	0.00458045	0.00267301	0.777022
ENSG00000137185	ZSCAN9	ENSG00000137185.7	0.00469829	0.39982	0.717636	0.00257732	0.00135837	0.923992
ENSG00000189308	LIN54	ENSG00000189308.6	0.00305431	0.399973	0.717636	0.00104924	0.000726712	0.52989
ENSG00000181638	ZFP41	ENSG00000181638.13	0.00758904	0.400618	0.717636	0.00137291	0.000730625	0.910036
ENSG00000163482	STK36	ENSG00000163482.7	0.00188927	0.401764	0.718154	0.00120347	0.000743391	0.695006
ENSG00000125319	C17orf53	ENSG00000125319.10	0.00304827	0.402447	0.718736	0.0034022	0.00222622	0.611873
ENSG00000185813	PCYT2	ENSG00000185813.6	0.00575428	0.404279	0.719965	0.00291555	0.00183959	0.664384
ENSG00000198168	SVIP	ENSG00000198168.4	0.00336844	0.406452	0.721367	0.00099725	0.000515649	0.951566
ENSG00000137267	TUBB2A	ENSG00000137267.5	0.00609928	0.407816	0.721367	0.00367983	0.00256731	0.519377
ENSG00000162928	PEX13	ENSG00000162928.8	0.00475974	0.407923	0.721367	0.00211223	0.00132847	0.668994
ENSG00000178691	SUZ12	ENSG00000178691.6	0.00385582	0.407939	0.721367	0.00124054	0.000811897	0.611605
ENSG00000135241	PNPLA8	ENSG00000135241.12	0.00352466	0.408495	0.721477	0.00353729	0.00242004	0.547618
ENSG00000133997	MED6	ENSG00000133997.7	0.00214186	0.409764	0.723176	0.00279321	0.0019745	0.500435
ENSG00000186815	TPCN1	ENSG00000186815.8	0.00164401	0.411033	0.723927	0.00451046	0.00298797	0.59411
ENSG00000127328	RAB3IP	ENSG00000127328.17	0.00480342	0.411429	0.724029	0.0027476	0.00107043	1.35998
ENSG00000171428	NAT1	ENSG00000171428.9	0.00389877	0.411455	0.724029	0.00384909	0.00184791	1.05862
ENSG00000163590	PPM1L	ENSG00000163590.9	0.00323005	0.413099	0.725282	0.00258478	0.00158985	0.701147
ENSG00000102221	JADE3	ENSG00000102221.9	0.00296138	0.413917	0.725685	0.00154573	0.00106439	0.538259
ENSG00000172466	ZNF24	ENSG00000172466.11	0.00318818	0.415454	0.725879	0.00110713	0.000757109	0.54825
ENSG00000196150	ZNF250	ENSG00000196150.9	0.00544614	0.415759	0.725879	0.00237299	0.00163562	0.536863
ENSG00000166444	ST5	ENSG00000166444.13	0.00301976	0.416778	0.726679	0.00359181	0.00252357	0.509246
ENSG00000196313	POM121	ENSG00000196313.7	0.00537235	0.419016	0.728084	0.00231977	0.00157234	0.561066
ENSG00000167766	ZNF83	ENSG00000167766.14	0.00573771	0.419168	0.728084	0.00099309	0.000680549	0.545226
ENSG00000075303	SLC25A40	ENSG00000075303.8	0.00408875	0.419323	0.728084	0.00276042	0.00182108	0.600094
ENSG00000163584	RPL22L1	ENSG00000163584.13	0.00312496	0.422627	0.730141	0.0028737	0.00197334	0.542269
ENSG00000205352	PRR13	ENSG00000205352.6	0.00165998	0.423324	0.730497	0.0011037	0.000689545	0.678636
ENSG00000196116	TDRD7	ENSG00000196116.6	0.0057	0.424449	0.73156	0.00393892	0.00272349	0.532347
ENSG00000116497	S100PBP	ENSG00000116497.13	0.00277141	0.425376	0.732156	0.00233308	0.00158297	0.559598
ENSG00000101935	AMMECR1	ENSG00000101935.5	0.00308329	0.426701	0.733222	0.00100071	0.00062415	0.681066
ENSG00000172613	RAD9A	ENSG00000172613.3	0.00373176	0.432811	0.737762	0.0015697	0.00103689	0.598228
ENSG00000047634	SCML1	ENSG00000047634.10	0.0024659	0.433122	0.738045	0.000683901	0.000348043	0.974524
ENSG00000188785	ZNF548	ENSG00000188785.7	0.00152714	0.434971	0.738695	0.00150194	0.000845285	0.829317
ENSG00000023902	PLEKHO1	ENSG00000023902.9	0.00331551	0.44174	0.745711	0.00226767	0.00131311	0.788217
ENSG00000198018	ENTPD7	ENSG00000198018.6	0.00302005	0.442796	0.745946	0.00166324	0.00111696	0.574424
ENSG00000132952	USPL1	ENSG00000132952.7	0.00285875	0.448647	0.750005	0.00187187	0.0010622	0.817427
ENSG00000152443	ZNF776	ENSG00000152443.8	0.00389185	0.449096	0.750005	0.000675275	0.000372023	0.860082
ENSG00000113595	TRIM23	ENSG00000113595.10	0.00695218	0.449215	0.750005	0.00199985	0.00129849	0.623061
ENSG00000070540	WIPI1	ENSG00000070540.8	0.00291575	0.450204	0.750514	0.00351609	0.00238933	0.557363
ENSG00000197951	ZNF71	ENSG00000197951.4	0.00957019	0.452214	0.751716	0.00249857	0.00158972	0.652329
ENSG00000101871	MID1	ENSG00000101871.10	0.00138471	0.457478	0.755069	0.00230797	0.00161738	0.512967
ENSG00000133818	RRAS2	ENSG00000133818.8	0.00280367	0.458192	0.755428	0.00176766	0.00110411	0.678963
ENSG00000152409	JMY	ENSG00000152409.8	0.0027962	0.463655	0.75973	0.00156459	0.000899728	0.79822
ENSG00000186073	C15orf41	ENSG00000186073.7	0.00247872	0.463842	0.759776	0.00454748	0.00276815	0.716145
ENSG00000128891	C15orf57	ENSG00000128891.11	0.0035544	0.46556	0.760994	0.00305702	0.00208345	0.553151
ENSG00000145425	RPS3A	ENSG00000145425.5	0.00596496	0.465976	0.761021	0.000306311	0.000110897	1.46578
ENSG00000005189	ENSG00000005189	ENSG00000005189.15	0.0032592	0.467073	0.761613	0.00226843	0.00143555	0.660089
ENSG00000136197	C7orf25	ENSG00000136197.8	0.00206215	0.467735	0.761683	0.00253493	0.00148889	0.767708
ENSG00000135083	CCNJL	ENSG00000135083.10	0.0048191	0.470919	0.763501	0.00210132	0.00139639	0.589588
ENSG00000160360	GPSM1	ENSG00000160360.7	0.0131248	0.471297	0.763608	0.00326856	0.0020901	0.645082
ENSG00000119986	AVPI1	ENSG00000119986.6	0.0063563	0.472231	0.764141	0.00461603	0.00307941	0.583998
ENSG00000196118	CCDC189	ENSG00000196118.7	0.0139642	0.472646	0.764141	0.00479141	0.00318358	0.589799
ENSG00000107679	PLEKHA1	ENSG00000107679.10	0.00177778	0.485986	0.775621	0.00196677	0.00125486	0.648298
ENSG00000105993	DNAJB6	ENSG00000105993.10	0.00106363	0.48774	0.776574	0.000790246	0.000552094	0.517389
ENSG00000198517	MAFK	ENSG00000198517.5	0.0118624	0.490889	0.778786	0.00206635	0.00124369	0.732451
ENSG00000137714	FDX1	ENSG00000137714.2	0.00579368	0.494653	0.781067	0.00311971	0.00187161	0.737135
ENSG00000121410	A1BG	ENSG00000121410.7	0.0073513	0.500888	0.784727	0.00621941	0.00373759	0.734669
ENSG00000135365	PHF21A	ENSG00000135365.11	0.00230079	0.50129	0.785091	0.00349303	0.00240476	0.538588
ENSG00000151148	UBE3B	ENSG00000151148.9	0.0017307	0.502045	0.785684	0.00138532	0.000897224	0.62668
ENSG00000082438	COBLL1	ENSG00000082438.11	0.00173926	0.502526	0.785937	0.00075428	0.000486326	0.633176
ENSG00000141084	RANBP10	ENSG00000141084.6	0.00304536	0.506148	0.788672	0.00227351	0.00118643	0.938293
ENSG00000119878	CRIPT	ENSG00000119878.5	0.00492507	0.507203	0.789339	0.00325774	0.00208462	0.644088
ENSG00000189227	C15orf61	ENSG00000189227.4	0.00531072	0.510146	0.790927	0.0100641	0.00635467	0.663333
ENSG00000083799	CYLD	ENSG00000083799.13	0.00292072	0.51042	0.790953	0.00119805	0.000804728	0.574113
ENSG00000164066	INTU	ENSG00000164066.8	0.00533144	0.513488	0.792627	0.00135979	0.000602029	1.17548
ENSG00000108590	MED31	ENSG00000108590.6	0.00320257	0.514071	0.792957	0.00279366	0.00188079	0.570817
ENSG00000259316	ENSG00000259316	ENSG00000259316.3	0.00442762	0.51649	0.793709	0.00182743	0.0011075	0.722502
ENSG00000132436	FIGNL1	ENSG00000132436.7	0.00380463	0.51845	0.794927	0.00184638	0.00111778	0.724056
ENSG00000119929	CUTC	ENSG00000119929.8	0.00163906	0.521067	0.796661	0.00190682	0.00117333	0.700558
ENSG00000159596	TMEM69	ENSG00000159596.6	0.00210857	0.523029	0.797734	0.00280493	0.00196453	0.513784
ENSG00000108306	FBXL20	ENSG00000108306.7	0.00192206	0.52387	0.798009	0.00183993	0.00108623	0.760323
ENSG00000109654	TRIM2	ENSG00000109654.10	0.00256559	0.524165	0.798101	0.0013242	0.000834898	0.665451
ENSG00000143553	SNAPIN	ENSG00000143553.6	0.00166432	0.525973	0.798797	0.00360483	0.00230158	0.647305
ENSG00000213901	SLC23A3	ENSG00000213901.6	0.00175361	0.533622	0.80278	0.00406224	0.00273387	0.571331
ENSG00000023171	GRAMD1B	ENSG00000023171.10	0.00220832	0.536586	0.804906	0.00226963	0.00158769	0.515532
ENSG00000181135	ZNF707	ENSG00000181135.11	0.00941175	0.536676	0.804906	0.0032203	0.00207422	0.634623
ENSG00000121766	ZCCHC17	ENSG00000121766.10	0.00139126	0.541196	0.807185	0.00121807	0.000755167	0.689728
ENSG00000186230	ZNF749	ENSG00000186230.6	0.00335966	0.542156	0.807716	0.00172561	0.000921775	0.904622
ENSG00000123395	ATG101	ENSG00000123395.10	0.0045857	0.544841	0.809862	0.00392051	0.00276595	0.503267
ENSG00000267618	ENSG00000267618	ENSG00000267618.1	0.00209006	0.551593	0.813114	0.00404938	0.00240262	0.753096
ENSG00000160688	FLAD1	ENSG00000160688.14	0.00280367	0.552449	0.813485	0.00184763	0.00118201	0.644429
ENSG00000184205	TSPYL2	ENSG00000184205.10	0.00285228	0.562147	0.818064	0.00241244	0.00167789	0.523846
ENSG00000132970	WASF3	ENSG00000132970.8	0.00282405	0.562221	0.818064	0.00237621	0.00151214	0.65207
ENSG00000198740	ZNF652	ENSG00000198740.4	0.00276232	0.570742	0.821156	0.00126842	0.000824982	0.620598
ENSG00000088179	PTPN4	ENSG00000088179.4	0.00371444	0.573654	0.822106	0.00113943	0.000425131	1.42234
ENSG00000163235	TGFA	ENSG00000163235.11	0.00232807	0.575009	0.823228	0.00291464	0.00181154	0.686097
ENSG00000114405	C3orf14	ENSG00000114405.6	0.0039164	0.578093	0.824995	0.00476682	0.00311139	0.615468
ENSG00000065600	TMEM206	ENSG00000065600.8	0.00403058	0.580362	0.826308	0.00401073	0.00279961	0.518639
ENSG00000056277	ZNF280C	ENSG00000056277.11	0.00388521	0.585524	0.828854	0.00149796	0.000989288	0.598539
ENSG00000164023	SGMS2	ENSG00000164023.10	0.00267734	0.587162	0.829388	0.00200455	0.00137705	0.541701
ENSG00000075131	TIPIN	ENSG00000075131.5	0.00337386	0.587425	0.829446	0.003141	0.0019511	0.686934
ENSG00000198130	HIBCH	ENSG00000198130.10	0.00283969	0.589536	0.83068	0.00169509	0.00113821	0.574595
ENSG00000138036	DYNC2LI1	ENSG00000138036.14	0.00348644	0.593698	0.833279	0.00461433	0.00321031	0.523409
ENSG00000185946	RNPC3	ENSG00000185946.11	0.00480101	0.600717	0.837053	0.00183738	0.00118414	0.633807
ENSG00000161048	NAPEPLD	ENSG00000161048.7	0.00394941	0.6048	0.838229	0.00179094	0.00126501	0.501567
ENSG00000100532	CGRRF1	ENSG00000100532.7	0.00280717	0.611035	0.841299	0.0036793	0.00237083	0.63404
ENSG00000168301	KCTD6	ENSG00000168301.8	0.00684397	0.613466	0.841799	0.00250428	0.00171512	0.546085
ENSG00000117569	PTBP2	ENSG00000117569.14	0.00419299	0.620176	0.84517	0.00275373	0.00194393	0.502411
ENSG00000177614	PGBD5	ENSG00000177614.5	0.00578161	0.620797	0.845274	1.33094	0.789525	0.753384
ENSG00000115540	MOB4	ENSG00000115540.10	0.00465968	0.62822	0.84884	0.00139077	0.000904477	0.620726
ENSG00000135968	GCC2	ENSG00000135968.15	0.00363807	0.633007	0.851196	0.00213511	0.00148669	0.52221
ENSG00000168765	GSTM4	ENSG00000168765.11	0.00644209	0.633511	0.851586	0.0100235	0.00700779	0.516357
ENSG00000162836	ACP6	ENSG00000162836.7	0.00250028	0.633977	0.851589	0.0038165	0.0025585	0.576955
ENSG00000213588	ZBTB9	ENSG00000213588.4	0.00356031	0.634554	0.851735	0.00298426	0.00200755	0.571937
ENSG00000105793	GTPBP10	ENSG00000105793.11	0.00420752	0.646193	0.858184	0.00128788	0.000862935	0.577672
ENSG00000013563	DNASE1L1	ENSG00000013563.9	0.00499073	0.653406	0.861956	0.0057515	0.00391748	0.554013
ENSG00000150776	C11orf57	ENSG00000150776.13	0.00352191	0.654545	0.862233	0.000529898	0.000354405	0.580316
ENSG00000138050	THUMPD2	ENSG00000138050.10	0.003192	0.659309	0.864062	0.0020266	0.00140397	0.529544
ENSG00000025434	NR1H3	ENSG00000025434.14	0.00790451	0.678623	0.873981	0.00764765	0.0050133	0.609257
ENSG00000000457	SCYL3	ENSG00000000457.9	0.00240342	0.692543	0.881207	0.00118373	0.000641095	0.884727
ENSG00000139625	MAP3K12	ENSG00000139625.8	0.002074	0.693413	0.881674	0.00146905	0.000909582	0.691608
ENSG00000151748	SAV1	ENSG00000151748.10	0.00255362	0.700804	0.886037	0.00193018	0.00108223	0.834718
ENSG00000022567	SLC45A4	ENSG00000022567.5	0.00284931	0.702945	0.887122	0.00332812	0.00204772	0.700686
ENSG00000267699	ENSG00000267699	ENSG00000267699.2	0.00370662	0.70424	0.887207	0.0021396	0.00149224	0.519862
ENSG00000130303	BST2	ENSG00000130303.8	0.012798	0.714158	0.891769	0.0407169	0.0145873	1.48091
ENSG00000156381	ANKRD9	ENSG00000156381.4	0.0248295	0.719399	0.893687	0.00318986	0.00216784	0.557237
ENSG00000159267	HLCS	ENSG00000159267.10	0.00174611	0.740179	0.904536	0.00121701	0.000807324	0.59212
ENSG00000032742	IFT88	ENSG00000032742.13	0.00564099	0.752456	0.910348	0.0047534	0.00296245	0.682168
ENSG00000069712	KIAA1107	ENSG00000069712.9	0.00400987	0.761344	0.915664	0.00351523	0.00199321	0.818521
ENSG00000107537	PHYH	ENSG00000107537.9	0.00304403	0.769125	0.919018	0.00316703	0.00158411	0.999454
ENSG00000141428	C18orf21	ENSG00000141428.12	0.00323679	0.771582	0.919632	0.00288052	0.0019165	0.587856
ENSG00000114933	INO80D	ENSG00000114933.11	0.00398239	0.798534	0.931684	0.00101431	0.000705036	0.524727
ENSG00000189057	FAM111B	ENSG00000189057.6	0.00496157	0.80528	0.933656	0.00103855	0.000660123	0.653758
ENSG00000124523	SIRT5	ENSG00000124523.10	0.00358662	0.807928	0.933987	0.00254821	0.00156702	0.701458
ENSG00000054598	FOXC1	ENSG00000054598.5	0.0018973	0.812682	0.935633	0.0022044	0.00146478	0.589705
ENSG00000145882	PCYOX1L	ENSG00000145882.6	0.00189426	0.815039	0.936509	0.00640736	0.00451378	0.505396
ENSG00000187257	RSBN1L	ENSG00000187257.10	0.00364845	0.827315	0.941588	0.00128564	0.000862486	0.575912
ENSG00000142188	TMEM50B	ENSG00000142188.12	0.00308806	0.847465	0.949737	0.0036343	0.00244526	0.571689
ENSG00000185621	LMLN	ENSG00000185621.7	0.00215924	0.853204	0.95072	0.0016032	0.00106807	0.585955
ENSG00000132570	PCBD2	ENSG00000132570.10	0.00201706	0.86452	0.955632	0.002672	0.00169871	0.653479
ENSG00000213204	ENSG00000213204	ENSG00000213204.4	0.00187527	0.87729	0.960783	0.00564413	0.00357711	0.657959
ENSG00000164414	SLC35A1	ENSG00000164414.12	0.00238171	0.87971	0.962011	0.00369865	0.00234658	0.656438
ENSG00000073464	CLCN4	ENSG00000073464.7	0.00306861	0.937283	0.98276	0.00346321	0.00241594	0.519529
ENSG00000097096	SYDE2	ENSG00000097096.8	0.00251777	0.955325	0.987559	0.00129851	0.000885134	0.55289
ENSG00000070159	PTPN3	ENSG00000070159.9	0.00375264	0.957233	0.987943	0.00192067	0.00114258	0.749314
ENSG00000118960	HS1BP3	ENSG00000118960.8	0.00786331	0.962682	0.98951	0.00362848	0.00196894	0.881941
ENSG00000156052	GNAQ	ENSG00000156052.6	0.0042524	0.973547	0.992773	0.00047708	0.000319904	0.576589
ENSG00000139971	C14orf37	ENSG00000139971.11	0.00561113	0.974483	0.992923	0.00635139	0.00447502	0.505178
ENSG00000171425	ZNF581	ENSG00000171425.5	0.0104132	0.997216	0.999896	0.00387266	0.00245945	0.654991
