# Supplementary material for: EIF1AX and RAS Mutations Cooperate to Drive Thyroid Tumorigenesis through ATF4 and c-MYC
Source: Oxford University Press journal article supplement (doi:10.1158/2159-8290.cd-18-0606), 2018-10-10
Supplement: 21598290cd180606-sup-202575_2_supp_5068110_pfxppw.xlsx [file 21598290cd180606-sup-202575_2_supp_5068110_pfxppw.xlsx]

## Sheet: C643_TE-DOWN
List of genes translated with lower efficiency (TE-down) in C643 vs. C643-spl-rev cells by ribosome profiling
ensembl_gene_id	hgnc_symbol	id	disper	pval	padj	TE_C643	TE_C643-spl-rev	log2FC_TE.C643vs.C643spl-rev
ENSG00000137801	THBS1	ENSG00000137801.9	0.00110498	0	0	0.00341741	0.00579212	-0.761187
ENSG00000148426	PROSER2	ENSG00000148426.8	0.029882	0	0	10.1557	85.3268	-3.0707
ENSG00000105939	ZC3HAV1	ENSG00000105939.8	0.00125309	6.66134e-16	2.23577e-12	0.000934814	0.00368636	-1.97945
ENSG00000128645	HOXD1	ENSG00000128645.11	0.0537084	1.55431e-15	3.91259e-12	2.16824	21.7243	-3.32471
ENSG00000112984	KIF20A	ENSG00000112984.7	0.00176249	7.81375e-13	1.19614e-09	0.00338222	0.00765244	-1.17795
ENSG00000010292	NCAPD2	ENSG00000010292.8	0.00117793	8.31557e-13	1.19614e-09	0.00327746	0.00571983	-0.803393
ENSG00000118707	TGIF2	ENSG00000118707.5	0.00720379	8.21132e-12	1.0335e-08	0.0154352	0.0571994	-1.88978
ENSG00000131747	TOP2A	ENSG00000131747.10	0.00327389	3.22311e-11	3.24535e-08	0.00158929	0.00301295	-0.9228
ENSG00000134057	CCNB1	ENSG00000134057.10	0.00234662	3.57137e-11	3.2691e-08	0.00483688	0.00928121	-0.940235
ENSG00000115306	SPTBN1	ENSG00000115306.11	0.000999027	7.75076e-11	6.50353e-08	0.000503935	0.00100165	-0.991065
ENSG00000130881	LRP3	ENSG00000130881.9	0.00666835	1.10242e-10	8.53865e-08	0.00568625	0.518805	-6.51157
ENSG00000197694	SPTAN1	ENSG00000197694.9	0.00143263	3.85135e-10	2.58528e-07	0.0010202	0.00218322	-1.0976
ENSG00000101447	FAM83D	ENSG00000101447.9	0.00127329	3.43525e-09	2.03468e-06	0.00304483	0.00805835	-1.40412
ENSG00000173706	HEG1	ENSG00000173706.8	0.00383281	7.05711e-09	3.7399e-06	0.00240004	0.00541797	-1.17469
ENSG00000113810	SMC4	ENSG00000113810.11	0.00267035	1.00409e-08	5.05508e-06	0.00137312	0.00248634	-0.856559
ENSG00000173193	PARP14	ENSG00000173193.9	0.00189878	1.24343e-08	5.96194e-06	0.000661281	0.00314815	-2.25117
ENSG00000218891	ZNF579	ENSG00000218891.2	0.0302795	1.54708e-08	7.08071e-06	0.00958254	0.0501274	-2.38712
ENSG00000070214	SLC44A1	ENSG00000070214.11	0.00334053	3.15197e-08	1.33816e-05	0.00206362	0.00541881	-1.3928
ENSG00000130402	ACTN4	ENSG00000130402.7	0.00293295	3.18957e-08	1.33816e-05	0.00290526	0.00441349	-0.603254
ENSG00000113083	LOX	ENSG00000113083.8	0.00180427	4.24008e-08	1.46588e-05	0.00704466	0.0161308	-1.19522
ENSG00000104419	NDRG1	ENSG00000104419.10	0.00687352	4.25123e-08	1.46588e-05	0.00212394	0.0132856	-2.64505
ENSG00000114353	GNAI2	ENSG00000114353.12	0.0027546	8.29233e-08	2.6934e-05	0.00399888	0.0070012	-0.808007
ENSG00000100345	MYH9	ENSG00000100345.16	0.00219608	1.0683e-07	3.25961e-05	0.00234182	0.0032738	-0.483336
ENSG00000145730	PAM	ENSG00000145730.16	0.00150602	2.80295e-07	8.06368e-05	0.00253019	0.00467563	-0.885915
ENSG00000088325	TPX2	ENSG00000088325.11	0.0013723	3.21049e-07	8.91463e-05	0.00209305	0.00344067	-0.717085
ENSG00000108821	COL1A1	ENSG00000108821.9	0.00569139	3.27581e-07	8.91463e-05	0.00521868	0.0210065	-2.00908
ENSG00000115318	LOXL3	ENSG00000115318.7	0.003169	4.57586e-07	0.000118139	0.00357877	0.00857588	-1.26082
ENSG00000116560	SFPQ	ENSG00000116560.6	0.00139257	4.71837e-07	0.000118237	0.00117485	0.00196194	-0.739802
ENSG00000164611	PTTG1	ENSG00000164611.8	0.00137231	4.81448e-07	0.000118237	0.00237547	0.00496853	-1.06461
ENSG00000090863	GLG1	ENSG00000090863.7	0.00100179	5.22879e-07	0.000125354	0.00569297	0.00869696	-0.611328
ENSG00000158710	TAGLN2	ENSG00000158710.10	0.00374147	7.32627e-07	0.000171554	0.00180298	0.0031	-0.781884
ENSG00000080986	NDC80	ENSG00000080986.8	0.00248722	1.03894e-06	0.000232468	0.00275568	0.00608756	-1.14346
ENSG00000198901	PRC1	ENSG00000198901.9	0.00141091	1.07693e-06	0.00023573	0.00252702	0.00489045	-0.952527
ENSG00000100023	PPIL2	ENSG00000100023.13	0.00387795	1.22234e-06	0.000253959	0.0121939	0.0242509	-0.991877
ENSG00000137628	DDX60	ENSG00000137628.12	0.00379247	1.24911e-06	0.000253959	0.00221989	0.0075652	-1.76889
ENSG00000164104	HMGB2	ENSG00000164104.7	0.00167143	1.35192e-06	0.000266912	0.00328824	0.00590825	-0.845417
ENSG00000090924	PLEKHG2	ENSG00000090924.10	0.00626109	1.47028e-06	0.000280459	0.000387254	0.00399434	-3.36661
ENSG00000100342	APOL1	ENSG00000100342.16	0.00317989	1.47625e-06	0.000280459	0.00969727	0.0374368	-1.94881
ENSG00000164307	ERAP1	ENSG00000164307.8	0.00183755	1.56292e-06	0.000291427	0.00198586	0.00502503	-1.33937
ENSG00000130985	UBA1	ENSG00000130985.12	0.00253084	1.72176e-06	0.000315208	0.00422202	0.00643074	-0.607051
ENSG00000175216	CKAP5	ENSG00000175216.10	0.00135345	2.14208e-06	0.000365569	0.00142062	0.00257365	-0.857294
ENSG00000221955	SLC12A8	ENSG00000221955.6	0.00338785	2.51251e-06	0.000421641	0.00192983	0.014113	-2.87048
ENSG00000100027	YPEL1	ENSG00000100027.10	0.00457892	2.60481e-06	0.00042303	0.0950157	0.203993	-1.10228
ENSG00000011426	ANLN	ENSG00000011426.6	0.00310935	2.89676e-06	0.000462976	0.00194863	0.00308899	-0.664675
ENSG00000166851	PLK1	ENSG00000166851.10	0.00242595	3.76379e-06	0.000574206	0.00503772	0.00826258	-0.713821
ENSG00000140575	IQGAP1	ENSG00000140575.8	0.00175092	4.55167e-06	0.000664213	0.00111182	0.00196223	-0.819578
ENSG00000134333	LDHA	ENSG00000134333.9	0.00252707	4.93536e-06	0.000699918	0.00188741	0.00280305	-0.570592
ENSG00000184702	2017-09-05	ENSG00000184702.13	0.00344283	5.25325e-06	0.00071856	0.00308297	0.0810764	-4.71689
ENSG00000153147	SMARCA5	ENSG00000153147.5	0.00183819	5.2809e-06	0.00071856	0.00181011	0.00301172	-0.734514
ENSG00000150938	CRIM1	ENSG00000150938.5	0.00192481	5.40523e-06	0.00072567	0.00242058	0.00364624	-0.591056
ENSG00000044115	CTNNA1	ENSG00000044115.16	0.00105157	6.22601e-06	0.000824864	0.00249319	0.00339085	-0.443655
ENSG00000138829	FBN2	ENSG00000138829.6	0.000918004	7.20791e-06	0.00091869	0.0044364	0.00719276	-0.697156
ENSG00000105976	MET	ENSG00000105976.10	0.00203522	8.2399e-06	0.000999608	0.00337637	0.00473537	-0.488003
ENSG00000138180	CEP55	ENSG00000138180.11	0.0031165	8.79809e-06	0.00104832	0.00174816	0.00389606	-1.15618
ENSG00000157456	CCNB2	ENSG00000157456.3	0.00236349	9.53331e-06	0.0011002	0.00399908	0.00830131	-1.05367
ENSG00000136068	FLNB	ENSG00000136068.10	0.00146572	9.61544e-06	0.0011002	0.00122646	0.00187858	-0.615141
ENSG00000087460	GNAS	ENSG00000087460.19	0.00116395	1.26768e-05	0.00141825	0.00434029	0.00632016	-0.54217
ENSG00000158856	DMTN	ENSG00000158856.13	0.0112609	1.29639e-05	0.00143443	0.559662	3.81406	-2.7687
ENSG00000127483	HP1BP3	ENSG00000127483.13	0.00163556	1.3207e-05	0.00144544	0.00148251	0.00281433	-0.924754
ENSG00000137563	GGH	ENSG00000137563.7	0.0049081	1.49232e-05	0.00159853	0.00774416	0.0127563	-0.720033
ENSG00000122884	P4HA1	ENSG00000122884.8	0.00281095	1.64589e-05	0.00174447	0.0060816	0.010779	-0.825694
ENSG00000164548	TRA2A	ENSG00000164548.6	0.00315267	1.68195e-05	0.00176412	0.00286197	0.00681352	-1.25139
ENSG00000117724	CENPF	ENSG00000117724.8	0.00235311	1.87362e-05	0.00191445	0.00164154	0.0024829	-0.596971
ENSG00000253910	PCDHGB2	ENSG00000253910.1	0.00184478	1.88232e-05	0.00191445	0.00722014	0.0115927	-0.683112
ENSG00000167325	RRM1	ENSG00000167325.10	0.00227501	1.98371e-05	0.00199739	0.00174805	0.00283266	-0.696415
ENSG00000168056	LTBP3	ENSG00000168056.10	0.00970828	2.52499e-05	0.00244463	0.00641471	0.0144469	-1.1713
ENSG00000164649	CDCA7L	ENSG00000164649.15	0.00108532	3.10007e-05	0.00288477	0.000728154	0.00211771	-1.54019
ENSG00000068489	PRR11	ENSG00000068489.8	0.00224172	3.13345e-05	0.00288477	0.00306312	0.00542912	-0.825716
ENSG00000139291	TMEM19	ENSG00000139291.9	0.00543905	3.1515e-05	0.00288477	0.00291258	0.00711792	-1.28916
ENSG00000166974	MAPRE2	ENSG00000166974.8	0.00181116	3.88162e-05	0.00345877	0.00141297	0.00500957	-1.82596
ENSG00000163902	RPN1	ENSG00000163902.7	0.00127709	3.95583e-05	0.00348641	0.00599544	0.00795033	-0.407148
ENSG00000166268	MYRFL	ENSG00000166268.6	0.00491566	3.9819e-05	0.00348641	0.191924	0.922794	-2.26547
ENSG00000123416	TUBA1B	ENSG00000123416.11	0.00269626	4.62119e-05	0.00386985	0.000606525	0.000963964	-0.668411
ENSG00000140382	HMG20A	ENSG00000140382.10	0.00261311	4.87223e-05	0.00402118	0.000660263	0.00416772	-2.65814
ENSG00000148926	ADM	ENSG00000148926.5	0.00365681	5.99738e-05	0.00477346	0.00431828	0.00753185	-0.802549
ENSG00000072110	ACTN1	ENSG00000072110.9	0.00370369	6.35827e-05	0.00492473	0.00243422	0.00343799	-0.498107
ENSG00000130508	PXDN	ENSG00000130508.6	0.00379436	7.02038e-05	0.00508548	0.00381604	0.00569483	-0.577576
ENSG00000049860	HEXB	ENSG00000049860.9	0.00125314	7.56989e-05	0.00536769	0.00616228	0.00876316	-0.507987
ENSG00000152952	PLOD2	ENSG00000152952.7	0.00440968	8.40538e-05	0.00568012	0.00296211	0.00438607	-0.566305
ENSG00000147852	VLDLR	ENSG00000147852.11	0.00446059	8.98295e-05	0.00595061	0.00119575	0.00915704	-2.93697
ENSG00000173175	ADCY5	ENSG00000173175.10	0.0193732	9.32644e-05	0.00609792	0.107342	0.377959	-1.81602
ENSG00000213676	ATF6B	ENSG00000213676.6	0.00524553	9.42183e-05	0.00612054	0.00619593	0.011763	-0.924867
ENSG00000165661	QSOX2	ENSG00000165661.11	0.00166032	0.000103061	0.00660968	0.00200081	0.00471603	-1.23699
ENSG00000136111	TBC1D4	ENSG00000136111.8	0.00142592	0.000103832	0.00661701	0.000836418	0.00235855	-1.4956
ENSG00000137312	FLOT1	ENSG00000137312.10	0.00266822	0.000107477	0.00680618	0.0022449	0.00393714	-0.8105
ENSG00000163913	IFT122	ENSG00000163913.7	0.00229335	0.000108579	0.00683302	0.00146293	0.006431	-2.13618
ENSG00000035403	VCL	ENSG00000035403.12	0.000992981	0.000120864	0.00744114	0.00269348	0.00365074	-0.438717
ENSG00000138413	IDH1	ENSG00000138413.9	0.0026696	0.00012568	0.00766951	0.00433526	0.00806731	-0.895967
ENSG00000185104	FAF1	ENSG00000185104.15	0.00128162	0.000131999	0.00786449	0.0012671	0.00273447	-1.10973
ENSG00000169679	BUB1	ENSG00000169679.10	0.00210504	0.000137105	0.00803056	0.00197778	0.00360321	-0.865403
ENSG00000134222	PSRC1	ENSG00000134222.12	0.00154439	0.00013874	0.00803056	0.00211831	0.00481927	-1.1859
ENSG00000197043	ANXA6	ENSG00000197043.9	0.00233147	0.000138774	0.00803056	0.00327817	0.00490287	-0.580734
ENSG00000107201	DDX58	ENSG00000107201.5	0.00291076	0.000163791	0.00911601	0.00279914	0.00703688	-1.32995
ENSG00000008294	SPAG9	ENSG00000008294.16	0.00266982	0.000163869	0.00911601	0.0016046	0.00279155	-0.79885
ENSG00000131899	LLGL1	ENSG00000131899.6	0.00578039	0.000168653	0.0093306	0.00197404	0.00491391	-1.31572
ENSG00000072310	SREBF1	ENSG00000072310.12	0.00591113	0.000182679	0.00983635	0.00473135	0.00997643	-1.07627
ENSG00000172183	ISG20	ENSG00000172183.10	0.00644697	0.000195799	0.0103763	0.0087173	0.0292819	-1.74806
ENSG00000145386	CCNA2	ENSG00000145386.5	0.00241732	0.000209504	0.0108977	0.00280804	0.00484407	-0.786655
ENSG00000101096	NFATC2	ENSG00000101096.15	0.0173457	0.000209967	0.0108977	0.0724668	0.17424	-1.26568
ENSG00000125734	GPR108	ENSG00000125734.9	0.00470514	0.000243917	0.0121584	0.00315392	0.00763072	-1.27467
ENSG00000187608	ISG15	ENSG00000187608.5	0.00943197	0.000258948	0.0126484	0.00859829	0.0173803	-1.01533
ENSG00000092820	EZR	ENSG00000092820.13	0.00112757	0.000263571	0.012715	0.00253033	0.0037856	-0.581195
ENSG00000167323	STIM1	ENSG00000167323.5	0.00178389	0.000273103	0.0129607	0.00265121	0.0058673	-1.14605
ENSG00000124615	MOCS1	ENSG00000124615.13	0.00374432	0.000275546	0.0129648	0.000831276	0.00282075	-1.76268
ENSG00000167601	AXL	ENSG00000167601.7	0.00453771	0.000302697	0.0141761	0.00338752	0.00461856	-0.447215
ENSG00000184432	COPB2	ENSG00000184432.5	0.0016326	0.000309023	0.0144053	0.00196492	0.00288493	-0.554063
ENSG00000100201	DDX17	ENSG00000100201.14	0.00188858	0.000316011	0.0144633	0.00173576	0.00241028	-0.473636
ENSG00000158373	HIST1H2BD	ENSG00000158373.7	0.00326727	0.000327379	0.0148485	0.00207314	0.00316351	-0.609706
ENSG00000171603	CLSTN1	ENSG00000171603.12	0.00340794	0.000331579	0.0149048	0.00649437	0.00969234	-0.577654
ENSG00000122218	COPA	ENSG00000122218.10	0.000955789	0.000346841	0.0154629	0.0025605	0.00372156	-0.539482
ENSG00000111665	CDCA3	ENSG00000111665.7	0.00243345	0.000347068	0.0154629	0.00420548	0.00817629	-0.959178
ENSG00000148180	GSN	ENSG00000148180.12	0.00399853	0.000351545	0.0155934	0.00710494	0.0120684	-0.764344
ENSG00000159461	AMFR	ENSG00000159461.10	0.00131629	0.000371866	0.0163029	0.00328726	0.00503836	-0.61607
ENSG00000183778	B3GALT5	ENSG00000183778.13	0.00490837	0.000397623	0.0169647	0.0671937	0.140972	-1.06901
ENSG00000135269	TES	ENSG00000135269.13	0.00191494	0.000408971	0.0172351	0.00217282	0.00416646	-0.939257
ENSG00000150687	PRSS23	ENSG00000150687.7	0.00105256	0.000421084	0.0175929	0.00424175	0.00651104	-0.618229
ENSG00000152818	UTRN	ENSG00000152818.14	0.00191021	0.000429001	0.0177371	0.00157334	0.00248666	-0.660374
ENSG00000110651	CD81	ENSG00000110651.7	0.0036739	0.000429126	0.0177371	0.0155587	0.0225286	-0.534038
ENSG00000144711	IQSEC1	ENSG00000144711.9	0.00883135	0.000446339	0.0183436	0.0185891	0.0353505	-0.927271
ENSG00000142627	EPHA2	ENSG00000142627.9	0.00516806	0.000457492	0.0187016	0.00457221	0.00647054	-0.500995
ENSG00000090447	TFAP4	ENSG00000090447.7	0.101275	0.000458765	0.0187016	0.140459	0.52356	-1.8982
ENSG00000064012	CASP8	ENSG00000064012.17	0.00213514	0.000486682	0.0196016	0.0011898	0.00305045	-1.3583
ENSG00000071282	LMCD1	ENSG00000071282.7	0.00228133	0.000530765	0.0210405	0.00112766	0.0088755	-2.97649
ENSG00000026036	RTEL1-TNFRSF6B	ENSG00000026036.16	0.010241	0.000537264	0.0211317	0.00280894	0.00563824	-1.00522
ENSG00000125991	ERGIC3	ENSG00000125991.14	0.00221692	0.000597399	0.0228715	0.00530373	0.00806415	-0.604515
ENSG00000135114	OASL	ENSG00000135114.8	0.00432651	0.000615024	0.0234571	0.00491296	0.0122234	-1.31498
ENSG00000167202	TBC1D2B	ENSG00000167202.7	0.00122921	0.000672536	0.0254578	0.000346571	0.00163897	-2.24157
ENSG00000124207	CSE1L	ENSG00000124207.12	0.00348362	0.000677007	0.025531	0.00241845	0.00343563	-0.506494
ENSG00000214827	MTCP1	ENSG00000214827.5	0.00140639	0.000683802	0.0256911	0.000547092	0.00376645	-2.78335
ENSG00000065485	PDIA5	ENSG00000065485.13	0.00133722	0.000701981	0.0260821	0.00359714	0.00830331	-1.20683
ENSG00000196526	AFAP1	ENSG00000196526.6	0.00160658	0.000716893	0.0264036	0.000861702	0.00172875	-1.00447
ENSG00000171940	ZNF217	ENSG00000171940.9	0.00332821	0.000727537	0.0264801	0.00105721	0.0025896	-1.29247
ENSG00000070081	NUCB2	ENSG00000070081.11	0.00207946	0.000728472	0.0264801	0.0049062	0.00828006	-0.755035
ENSG00000156030	ELMSAN1	ENSG00000156030.8	0.00413289	0.000734492	0.0265075	0.000638706	0.00225545	-1.82019
ENSG00000082781	ITGB5	ENSG00000082781.7	0.00364772	0.000748073	0.0269012	0.00280663	0.00412617	-0.555962
ENSG00000205323	SARNP	ENSG00000205323.4	0.00145781	0.000766913	0.0273831	0.00076664	0.00266689	-1.79854
ENSG00000183856	IQGAP3	ENSG00000183856.6	0.00114689	0.000823787	0.0285042	0.00285408	0.00496628	-0.799138
ENSG00000126787	DLGAP5	ENSG00000126787.8	0.00421496	0.000864742	0.0295155	0.00165992	0.0030166	-0.861812
ENSG00000001561	ENPP4	ENSG00000001561.6	0.00716403	0.000898959	0.0303746	0.00228603	0.00791177	-1.79115
ENSG00000188994	ZNF292	ENSG00000188994.8	0.00273217	0.000914292	0.0307893	0.000479507	0.00169548	-1.82207
ENSG00000092964	DPYSL2	ENSG00000092964.12	0.000991191	0.000924706	0.0310362	0.00377348	0.00547009	-0.535667
ENSG00000198589	LRBA	ENSG00000198589.6	0.00282944	0.000935635	0.0312987	0.00126647	0.00251398	-0.989156
ENSG00000140320	BAHD1	ENSG00000140320.7	0.00478372	0.000964845	0.0318526	0.00108376	0.00419985	-1.9543
ENSG00000070444	MNT	ENSG00000070444.10	0.0078084	0.00098083	0.0319773	0.00199779	0.00562881	-1.49443
ENSG00000118257	NRP2	ENSG00000118257.12	0.00125963	0.00100485	0.032638	0.00515858	0.00795098	-0.624159
ENSG00000136824	SMC2	ENSG00000136824.14	0.00275912	0.00104768	0.0338113	0.00180444	0.00284189	-0.655302
ENSG00000115827	DCAF17	ENSG00000115827.9	0.00381116	0.00107202	0.0339886	0.000156662	0.00142207	-3.18227
ENSG00000205531	NAP1L4	ENSG00000205531.8	0.00109146	0.00107343	0.0339886	0.00123132	0.00212881	-0.789844
ENSG00000160223	ICOSLG	ENSG00000160223.12	0.00594043	0.00112298	0.0350254	0.0298244	0.250029	-3.06753
ENSG00000137100	DCTN3	ENSG00000137100.11	0.0024313	0.00112658	0.0350254	0.00435068	0.00784885	-0.851241
ENSG00000177932	ZNF354C	ENSG00000177932.6	0.00180321	0.00114162	0.0351528	0.000784175	0.00483177	-2.62331
ENSG00000134287	ARF3	ENSG00000134287.5	0.00128769	0.00121702	0.0371338	0.00285897	0.00419633	-0.553633
ENSG00000183722	LHFP	ENSG00000183722.7	0.00359562	0.00127079	0.0380683	0.000711125	0.00489893	-2.78429
ENSG00000198954	KIF1BP	ENSG00000198954.4	0.00246665	0.00131822	0.0390387	0.00229297	0.00521518	-1.1855
ENSG00000151690	MFSD6	ENSG00000151690.10	0.00186939	0.00133202	0.0392009	0.000224781	0.00312388	-3.79674
ENSG00000147813	NAPRT	ENSG00000147813.11	0.0119605	0.00133258	0.0392009	0.00322439	0.00804258	-1.31863
ENSG00000075142	SRI	ENSG00000075142.9	0.00165195	0.00134316	0.0392009	0.00462653	0.00767171	-0.729618
ENSG00000160789	LMNA	ENSG00000160789.15	0.0096224	0.0013518	0.0393389	0.00356072	0.0052642	-0.564044
ENSG00000146278	PNRC1	ENSG00000146278.10	0.0033672	0.0014018	0.0405597	0.00225515	0.00757777	-1.74855
ENSG00000162063	CCNF	ENSG00000162063.8	0.00815195	0.00143194	0.041313	0.00732113	0.0118411	-0.693666
ENSG00000134684	YARS	ENSG00000134684.6	0.00158732	0.00144288	0.0415097	0.00168305	0.00250498	-0.573723
ENSG00000180596	HIST1H2BC	ENSG00000180596.7	0.00142318	0.00149657	0.0426924	0.000888709	0.00135506	-0.608575
ENSG00000197121	PGAP1	ENSG00000197121.10	0.0025685	0.00150143	0.0426924	0.00158819	0.00483717	-1.60678
ENSG00000127990	SGCE	ENSG00000127990.11	0.00198718	0.0015335	0.0431194	0.00705426	0.0110716	-0.650294
ENSG00000077232	DNAJC10	ENSG00000077232.12	0.00322178	0.00154355	0.0431194	0.00119188	0.00213643	-0.84196
ENSG00000185215	TNFAIP2	ENSG00000185215.4	0.00499956	0.00154789	0.0431194	0.00110931	0.00264844	-1.25548
ENSG00000198146	ZNF770	ENSG00000198146.4	0.00273382	0.00155023	0.0431194	0.000307232	0.000962404	-1.64732
ENSG00000213928	IRF9	ENSG00000213928.4	0.00527149	0.00160778	0.0443527	0.00212335	0.00699558	-1.7201
ENSG00000082701	GSK3B	ENSG00000082701.10	0.00156527	0.00164998	0.0452689	0.000644547	0.0013784	-1.09664
ENSG00000105329	TGFB1	ENSG00000105329.5	0.00486825	0.00171367	0.0466351	0.00694568	0.0118768	-0.773955
ENSG00000187531	SIRT7	ENSG00000187531.9	0.00434243	0.00173787	0.0469131	0.00035985	0.00217359	-2.59461
ENSG00000178209	PLEC	ENSG00000178209.10	0.00867039	0.00174424	0.0469593	0.00129364	0.00189186	-0.548376
ENSG00000174564	IL20RB	ENSG00000174564.8	0.00242092	0.00175116	0.0470198	0.00250754	0.00482402	-0.943966
ENSG00000012048	BRCA1	ENSG00000012048.15	0.00340613	0.00185926	0.0492655	0.000365397	0.00112669	-1.62455
ENSG00000124155	PIGT	ENSG00000124155.12	0.00143284	0.0018726	0.0494622	0.0050457	0.00716892	-0.5067
ENSG00000146918	NCAPG2	ENSG00000146918.15	0.00179882	0.00190787	0.0498971	0.003246	0.00501833	-0.628546
ENSG00000062716	VMP1	ENSG00000062716.6	0.0079975	0.00201933	0.0520015	0.00171207	0.00276603	-0.692071
ENSG00000067141	NEO1	ENSG00000067141.12	0.00348504	0.00203551	0.0520967	0.00533224	0.0120161	-1.17216
ENSG00000169919	GUSB	ENSG00000169919.12	0.00199402	0.00203689	0.0520967	0.00629176	0.0115335	-0.8743
ENSG00000102024	PLS3	ENSG00000102024.13	0.00417494	0.00204372	0.0520967	0.00211851	0.00321608	-0.602252
ENSG00000115464	USP34	ENSG00000115464.10	0.00208611	0.00208259	0.0529351	0.000677733	0.000980373	-0.532614
ENSG00000166446	CDYL2	ENSG00000166446.10	0.00144925	0.00208712	0.0529351	0.000254344	0.00117663	-2.20981
ENSG00000091490	SEL1L3	ENSG00000091490.6	0.00388906	0.00210393	0.0532274	0.00197297	0.0070278	-1.8327
ENSG00000156858	PRR14	ENSG00000156858.7	0.00494063	0.00212253	0.0534293	0.000483278	0.00318583	-2.72075
ENSG00000077942	FBLN1	ENSG00000077942.13	0.00420193	0.00219723	0.0544923	0.0149666	0.0686031	-2.19653
ENSG00000096968	JAK2	ENSG00000096968.8	0.0018993	0.00221287	0.0547455	0.00142911	0.00409722	-1.51953
ENSG00000077147	TM9SF3	ENSG00000077147.10	0.00292251	0.00223772	0.0549551	0.00245627	0.00347511	-0.50059
ENSG00000092199	HNRNPC	ENSG00000092199.13	0.00171813	0.00235346	0.0564213	0.000651171	0.0010273	-0.657747
ENSG00000138778	CENPE	ENSG00000138778.7	0.00532162	0.00244512	0.0579292	0.00129164	0.00228107	-0.820507
ENSG00000166130	IKBIP	ENSG00000166130.10	0.0034003	0.00250827	0.0592857	0.00241702	0.00502607	-1.0562
ENSG00000130830	MPP1	ENSG00000130830.10	0.00183973	0.00253402	0.0596643	0.00439019	0.0081794	-0.897709
ENSG00000172493	AFF1	ENSG00000172493.16	0.00201472	0.00253613	0.0596643	0.000838058	0.00173005	-1.04569
ENSG00000155561	NUP205	ENSG00000155561.10	0.00177019	0.00254492	0.0597314	0.00135829	0.00208209	-0.616239
ENSG00000213445	SIPA1	ENSG00000213445.4	0.00960548	0.00274685	0.0637282	0.00183261	0.00591337	-1.69008
ENSG00000158470	B4GALT5	ENSG00000158470.5	0.00232367	0.00287241	0.0657325	0.00289183	0.0047269	-0.708913
ENSG00000128567	PODXL	ENSG00000128567.12	0.00114476	0.00296474	0.0670831	0.00304312	0.00588769	-0.952147
ENSG00000170421	KRT8	ENSG00000170421.7	0.00751662	0.00304637	0.0685597	0.000815441	0.0021621	-1.40678
ENSG00000142197	DOPEY2	ENSG00000142197.8	0.00264874	0.00305521	0.0685597	0.00198411	0.00539698	-1.44366
ENSG00000164211	STARD4	ENSG00000164211.8	0.00434958	0.00306798	0.0685597	0.000635623	0.00211744	-1.73608
ENSG00000100422	CERK	ENSG00000100422.9	0.00210404	0.00307463	0.0685597	0.000442256	0.00121946	-1.46329
ENSG00000116209	TMEM59	ENSG00000116209.7	0.00175355	0.00308428	0.0685597	0.0073372	0.00999491	-0.445965
ENSG00000197837	HIST4H4	ENSG00000197837.3	0.00889308	0.00313226	0.0687118	0.01408	0.02114	-0.586328
ENSG00000163808	KIF15	ENSG00000163808.12	0.00265639	0.00320411	0.0698766	0.00153296	0.00338806	-1.14413
ENSG00000155827	RNF20	ENSG00000155827.7	0.00195033	0.00320618	0.0698766	0.00192627	0.00335701	-0.801368
ENSG00000049618	ARID1B	ENSG00000049618.17	0.00390865	0.00327247	0.0706684	0.000893309	0.00167909	-0.91045
ENSG00000118689	FOXO3	ENSG00000118689.10	0.00132114	0.00332634	0.0714135	0.000240884	0.00082999	-1.78476
ENSG00000060749	QSER1	ENSG00000060749.10	0.00347353	0.00335978	0.0718251	0.000714985	0.00148502	-1.0545
ENSG00000206053	HN1L	ENSG00000206053.8	0.00111398	0.00346529	0.0738945	0.00047376	0.00110076	-1.21628
ENSG00000109685	NSD2	ENSG00000109685.13	0.0017902	0.00364184	0.0763951	0.000650617	0.00108246	-0.734433
ENSG00000081870	HSPB11	ENSG00000081870.7	0.00193782	0.0036875	0.0765978	0.00227288	0.00483852	-1.09004
ENSG00000102189	EEA1	ENSG00000102189.12	0.00394738	0.00371426	0.0769525	0.00185047	0.00321703	-0.797837
ENSG00000111199	TRPV4	ENSG00000111199.6	0.0828229	0.00374926	0.0772011	4.84398	15.9505	-1.71934
ENSG00000165406	2017-03-08	ENSG00000165406.11	0.00165355	0.00378366	0.0776943	0.000282472	0.00147988	-2.3893
ENSG00000188554	NBR1	ENSG00000188554.9	0.00102707	0.00381951	0.0776943	0.00167161	0.00240498	-0.524789
ENSG00000067992	PDK3	ENSG00000067992.8	0.00501167	0.00385458	0.0782495	0.00250666	0.00899779	-1.84381
ENSG00000133103	COG6	ENSG00000133103.12	0.00594621	0.00390122	0.0790371	0.00154285	0.00504244	-1.70852
ENSG00000103365	GGA2	ENSG00000103365.11	0.00170642	0.00396403	0.0799876	0.00144165	0.00310067	-1.10486
ENSG00000130479	MAP1S	ENSG00000130479.6	0.0134747	0.00403975	0.0811901	0.00375664	0.00836716	-1.1553
ENSG00000148516	ZEB1	ENSG00000148516.17	0.00305517	0.0040852	0.0813581	0.000608193	0.00150014	-1.3025
ENSG00000109689	STIM2	ENSG00000109689.10	0.00139881	0.00409368	0.0813581	0.000592994	0.00200498	-1.7575
ENSG00000176834	VSIG10	ENSG00000176834.9	0.0018057	0.00410002	0.0813581	0.00181139	0.00543442	-1.58503
ENSG00000138160	KIF11	ENSG00000138160.4	0.00433913	0.00411275	0.0813581	0.00193514	0.00309008	-0.675211
ENSG00000254122	PCDHGB7	ENSG00000254122.1	0.00197778	0.00418588	0.0820554	0.00144267	0.00303657	-1.0737
ENSG00000070371	CLTCL1	ENSG00000070371.11	0.00208652	0.00418874	0.0820554	0.00198371	0.00527923	-1.41213
ENSG00000135506	OS9	ENSG00000135506.11	0.00240392	0.00420007	0.0821174	0.00474104	0.00632954	-0.416896
ENSG00000100099	HPS4	ENSG00000100099.16	0.00124636	0.00421058	0.0821634	0.000366264	0.00113832	-1.63595
ENSG00000135119	RNFT2	ENSG00000135119.10	0.00191863	0.00427966	0.082932	0.00252811	0.00834071	-1.72211
ENSG00000013810	TACC3	ENSG00000013810.14	0.00859777	0.00431704	0.0832344	0.00403794	0.00679909	-0.751721
ENSG00000154229	PRKCA	ENSG00000154229.7	0.00102929	0.00437853	0.0835834	0.00165732	0.0023801	-0.522173
ENSG00000177602	GSG2	ENSG00000177602.4	0.00362255	0.0043947	0.0836489	0.00835343	0.0152505	-0.86842
ENSG00000109046	WSB1	ENSG00000109046.10	0.0022857	0.00443043	0.0841698	0.00154418	0.00384271	-1.31529
ENSG00000128335	APOL2	ENSG00000128335.9	0.00366742	0.00444416	0.0842717	0.00292496	0.00719341	-1.29826
ENSG00000178096	BOLA1	ENSG00000178096.8	0.00572957	0.00452815	0.0857029	0.037433	0.0589806	-0.655929
ENSG00000189060	H1F0	ENSG00000189060.4	0.00566613	0.00453903	0.0857476	0.00184245	0.00323418	-0.811777
ENSG00000152894	PTPRK	ENSG00000152894.10	0.00127685	0.00460747	0.086324	0.00277265	0.00370835	-0.419513
ENSG00000100056	DGCR14	ENSG00000100056.7	0.00575896	0.00462781	0.0864338	0.000530107	0.00295795	-2.48024
ENSG00000168298	HIST1H1E	ENSG00000168298.4	0.0175951	0.0046719	0.0865473	0.00253937	0.00405967	-0.67689
ENSG00000168807	SNTB2	ENSG00000168807.12	0.00142829	0.00469424	0.0865473	0.00062931	0.00154221	-1.29316
ENSG00000106771	TMEM245	ENSG00000106771.8	0.00202381	0.00482852	0.0879641	0.00217088	0.00345607	-0.670851
ENSG00000105974	CAV1	ENSG00000105974.7	0.00477472	0.00489027	0.0886075	0.00456354	0.00623431	-0.450076
ENSG00000144182	LIPT1	ENSG00000144182.12	0.00392573	0.00496854	0.0893361	0.00112285	0.00599262	-2.41603
ENSG00000163806	SPDYA	ENSG00000163806.11	0.00220153	0.00498313	0.0894388	0.0031334	0.00561309	-0.841067
ENSG00000104299	INTS9	ENSG00000104299.10	0.00682414	0.00504098	0.0898196	0.0137343	0.0263948	-0.942467
ENSG00000068308	OTUD5	ENSG00000068308.9	0.00273159	0.00506691	0.0898196	0.00128238	0.00388633	-1.59959
ENSG00000159259	CHAF1B	ENSG00000159259.7	0.00127136	0.00506901	0.0898196	0.00188266	0.00413632	-1.13558
ENSG00000184661	CDCA2	ENSG00000184661.9	0.00169147	0.00512536	0.0902225	0.00157021	0.00286907	-0.869625
ENSG00000173402	DAG1	ENSG00000173402.7	0.00167089	0.00518078	0.0907447	0.00611024	0.00821435	-0.426917
ENSG00000272822	ENSG00000272822	ENSG00000272822.1	0.00252469	0.00521092	0.0909904	0.00998823	0.0161186	-0.690426
ENSG00000130164	LDLR	ENSG00000130164.7	0.00138257	0.00522309	0.0909904	0.0066489	0.00963463	-0.535114
ENSG00000139734	DIAPH3	ENSG00000139734.13	0.00286252	0.00529721	0.0918032	0.00237337	0.00416356	-0.810882
ENSG00000115548	KDM3A	ENSG00000115548.12	0.00189775	0.00534161	0.0920971	0.00203372	0.00345698	-0.765394
ENSG00000036549	ZZZ3	ENSG00000036549.8	0.00316903	0.00543204	0.0931775	0.00045341	0.000837276	-0.884886
ENSG00000111642	CHD4	ENSG00000111642.10	0.00101213	0.0055314	0.0943994	0.00112056	0.00155095	-0.468923
ENSG00000196358	NTNG2	ENSG00000196358.6	0.0707024	0.00565485	0.0951963	0.759568	2.43376	-1.67994
ENSG00000104517	UBR5	ENSG00000104517.8	0.00135608	0.00569422	0.0953995	0.000763237	0.0011273	-0.562674
ENSG00000138182	KIF20B	ENSG00000138182.10	0.00432686	0.00572171	0.0954694	0.00130634	0.00214248	-0.713754
ENSG00000170540	ARL6IP1	ENSG00000170540.10	0.00345353	0.00572683	0.0954694	0.00209917	0.0030702	-0.548515
ENSG00000172216	CEBPB	ENSG00000172216.4	0.00924555	0.0058073	0.095957	0.00507533	0.00876905	-0.788917
ENSG00000187790	FANCM	ENSG00000187790.6	0.00432274	0.00582754	0.095957	0.000532303	0.00148932	-1.48433
ENSG00000023287	RB1CC1	ENSG00000023287.8	0.00503676	0.00583343	0.095957	0.000740589	0.0012041	-0.701215
ENSG00000109911	ELP4	ENSG00000109911.13	0.00318318	0.00584186	0.095957	0.00128885	0.00382607	-1.56978
ENSG00000179387	ELMOD2	ENSG00000179387.5	0.00385577	0.00588883	0.0964141	0.00197932	0.00361129	-0.867511
ENSG00000107862	GBF1	ENSG00000107862.4	0.00123434	0.00590371	0.0964504	0.0025745	0.00371951	-0.530818
ENSG00000240184	PCDHGC3	ENSG00000240184.2	0.00237615	0.00591021	0.0964504	0.00292018	0.00449778	-0.623152
ENSG00000168806	LCMT2	ENSG00000168806.6	0.00204034	0.00593487	0.0966961	0.000428112	0.00218828	-2.35374
ENSG00000087586	AURKA	ENSG00000087586.13	0.00258237	0.00594628	0.0967255	0.00123265	0.0022432	-0.863791
ENSG00000115365	LANCL1	ENSG00000115365.7	0.00234867	0.0059816	0.0969256	0.00279225	0.00467636	-0.743961
ENSG00000139515	PDX1	ENSG00000139515.5	0.088761	0.00601145	0.0971413	4.09075	25.9678	-2.66629
ENSG00000089248	ERP29	ENSG00000089248.6	0.00367755	0.00602973	0.0971413	0.0061009	0.00935596	-0.616864
ENSG00000135040	NAA35	ENSG00000135040.11	0.00392001	0.0061501	0.0984505	0.00154473	0.00358336	-1.21396
ENSG00000179950	PUF60	ENSG00000179950.9	0.00424342	0.00618698	0.0987269	0.00340235	0.00466483	-0.455293
ENSG00000213639	PPP1CB	ENSG00000213639.5	0.00328592	0.00621686	0.0990468	0.00199945	0.0027614	-0.465795
ENSG00000169379	ARL13B	ENSG00000169379.11	0.00259232	0.00624313	0.0993082	0.00104844	0.0026716	-1.34946
ENSG00000145916	RMND5B	ENSG00000145916.14	0.00371691	0.00630754	0.0997289	0.000370556	0.00147961	-1.99745
ENSG00000165304	MELK	ENSG00000165304.3	0.00300792	0.00635329	0.100163	0.00268712	0.00373614	-0.475491
ENSG00000005339	CREBBP	ENSG00000005339.8	0.00470476	0.00639589	0.100468	0.00126875	0.00239779	-0.918296
ENSG00000132589	FLOT2	ENSG00000132589.11	0.00205248	0.00660889	0.102852	0.00328635	0.00623364	-0.923588
ENSG00000185019	UBOX5	ENSG00000185019.12	0.00285575	0.00670206	0.10398	0.000876748	0.00529734	-2.59503
ENSG00000143153	ATP1B1	ENSG00000143153.8	0.00324088	0.00673447	0.104071	0.00461308	0.00630964	-0.451826
ENSG00000149485	FADS1	ENSG00000149485.12	0.00167557	0.00674624	0.104071	0.00225376	0.00348267	-0.627859
ENSG00000140682	TGFB1I1	ENSG00000140682.14	0.00601316	0.006755	0.104071	0.00702174	0.0116406	-0.729269
ENSG00000241489	ENSG00000241489	ENSG00000241489.3	0.00215751	0.0068281	0.104071	0.000810451	0.00334693	-2.04604
ENSG00000259399	TGIF2-C20orf24	ENSG00000259399.1	0.00178649	0.00692074	0.104483	0.00369439	0.00509042	-0.462448
ENSG00000068354	TBC1D25	ENSG00000068354.11	0.00369354	0.00692211	0.104483	0.000434553	0.00457767	-3.39701
ENSG00000138246	DNAJC13	ENSG00000138246.11	0.00206599	0.00693357	0.104483	0.00102427	0.00174746	-0.77066
ENSG00000011258	MBTD1	ENSG00000011258.11	0.00390554	0.00698791	0.104483	0.000613583	0.00288333	-2.23241
ENSG00000120254	MTHFD1L	ENSG00000120254.11	0.00256911	0.00698996	0.104483	0.00226514	0.00349904	-0.627361
ENSG00000167900	TK1	ENSG00000167900.7	0.00510181	0.00699467	0.104483	0.00564833	0.00877609	-0.635753
ENSG00000171314	PGAM1	ENSG00000171314.8	0.00302907	0.00699697	0.104483	0.000881632	0.0023998	-1.44467
ENSG00000184792	OSBP2	ENSG00000184792.11	0.01283	0.00710157	0.105621	0.00324694	0.0219551	-2.7574
ENSG00000114346	ECT2	ENSG00000114346.9	0.00380864	0.00714546	0.105961	0.00184393	0.00274328	-0.573122
ENSG00000110851	PRDM4	ENSG00000110851.7	0.00131741	0.00726027	0.106448	0.00028155	0.00109067	-1.95374
ENSG00000163840	DTX3L	ENSG00000163840.5	0.00138382	0.00726227	0.106448	0.0012179	0.00209027	-0.779292
ENSG00000204580	DDR1	ENSG00000204580.7	0.00612232	0.00726288	0.106448	0.00244741	0.00718721	-1.55417
ENSG00000184897	H1FX	ENSG00000184897.4	0.0105294	0.00732655	0.107225	0.00770427	0.0121191	-0.653552
ENSG00000176105	YES1	ENSG00000176105.9	0.00382062	0.00736496	0.107475	0.000813946	0.00151851	-0.89965
ENSG00000100461	RBM23	ENSG00000100461.13	0.000936517	0.00755329	0.109588	0.00196273	0.00313301	-0.67469
ENSG00000166398	KIAA0355	ENSG00000166398.8	0.0022439	0.00763823	0.110185	0.000722528	0.00229672	-1.66845
ENSG00000148985	PGAP2	ENSG00000148985.15	0.00683302	0.00769011	0.110617	0.00332052	0.00832998	-1.32691
ENSG00000173230	GOLGB1	ENSG00000173230.11	0.00272565	0.00770952	0.110738	0.0018654	0.00298241	-0.676997
ENSG00000117139	KDM5B	ENSG00000117139.12	0.00290606	0.00780443	0.111534	0.000281524	0.00176194	-2.64583
ENSG00000104880	ARHGEF18	ENSG00000104880.13	0.00501871	0.00782031	0.111534	0.00115874	0.00206826	-0.835859
ENSG00000148090	AUH	ENSG00000148090.7	0.00202103	0.00791257	0.112214	0.00246454	0.00549231	-1.15609
ENSG00000066777	ARFGEF1	ENSG00000066777.4	0.00217764	0.0079784	0.112671	0.00111877	0.00174345	-0.640031
ENSG00000137161	CNPY3	ENSG00000137161.12	0.00384687	0.0080753	0.11279	0.00271608	0.0048799	-0.845322
ENSG00000177119	ANO6	ENSG00000177119.11	0.00191396	0.0080852	0.11279	0.00202872	0.0031095	-0.616115
ENSG00000168393	DTYMK	ENSG00000168393.8	0.00264113	0.00816132	0.113602	0.00277997	0.00462984	-0.735895
ENSG00000144451	SPAG16	ENSG00000144451.14	0.00457855	0.00817454	0.113602	0.00207028	0.0061054	-1.56026
ENSG00000145016	RUBCN	ENSG00000145016.9	0.00147771	0.00819012	0.113602	0.00078998	0.00243816	-1.62591
ENSG00000018699	TTC27	ENSG00000018699.7	0.00208708	0.00825144	0.114195	0.00180562	0.00376552	-1.06035
ENSG00000182173	TSEN54	ENSG00000182173.8	0.00464868	0.00827913	0.114195	0.00115461	0.00353399	-1.61389
ENSG00000185236	RAB11B	ENSG00000185236.7	0.0101182	0.00839656	0.115499	0.0134069	0.0207516	-0.630246
ENSG00000139613	SMARCC2	ENSG00000139613.7	0.00132308	0.00844129	0.115955	0.0025431	0.00368086	-0.533454
ENSG00000143376	SNX27	ENSG00000143376.8	0.00252936	0.00845498	0.115985	0.00102806	0.00252654	-1.29724
ENSG00000164073	MFSD8	ENSG00000164073.5	0.00511042	0.00852281	0.116537	0.00134574	0.00363502	-1.43356
ENSG00000175198	PCCA	ENSG00000175198.10	0.00186303	0.00867511	0.117881	0.00121943	0.00470266	-1.94727
ENSG00000136231	IGF2BP3	ENSG00000136231.9	0.00251411	0.00874006	0.118284	0.00029523	0.000753733	-1.35221
ENSG00000198554	WDHD1	ENSG00000198554.7	0.00291549	0.00877084	0.118542	0.000734775	0.00146666	-0.997162
ENSG00000127603	MACF1	ENSG00000127603.19	0.00143794	0.0088384	0.119295	0.0008432	0.00115828	-0.458039
ENSG00000136044	APPL2	ENSG00000136044.7	0.00195853	0.00896456	0.120674	0.001148	0.00284978	-1.31173
ENSG00000182712	CMC4	ENSG00000182712.11	0.00175546	0.00919437	0.122296	0.000451728	0.00291195	-2.68846
ENSG00000143624	INTS3	ENSG00000143624.9	0.00120501	0.00930175	0.123398	0.00137016	0.00219226	-0.678075
ENSG00000147274	RBMX	ENSG00000147274.10	0.00211891	0.00931525	0.123415	0.000307895	0.000630313	-1.03363
ENSG00000133612	AGAP3	ENSG00000133612.14	0.00798596	0.00936115	0.123535	0.000680629	0.00153637	-1.17459
ENSG00000054654	SYNE2	ENSG00000054654.11	0.00251981	0.00937524	0.123559	0.000713335	0.00170276	-1.25523
ENSG00000168528	SERINC2	ENSG00000168528.7	0.00875897	0.0094066	0.123811	0.00504424	0.0112172	-1.15301
ENSG00000180346	TIGD2	ENSG00000180346.2	0.00224743	0.00948903	0.12457	0.000384065	0.00159435	-2.05355
ENSG00000087086	FTL	ENSG00000087086.9	0.00517349	0.0095336	0.124992	0.000374579	0.000497783	-0.410245
ENSG00000105856	HBP1	ENSG00000105856.9	0.00278366	0.00955733	0.125014	0.00216187	0.00386195	-0.83705
ENSG00000157240	FZD1	ENSG00000157240.2	0.00544832	0.0095799	0.125014	0.00185835	0.00476804	-1.35937
ENSG00000141905	NFIC	ENSG00000141905.13	0.0113401	0.00958269	0.125014	0.00272871	0.00512072	-0.908126
ENSG00000100749	VRK1	ENSG00000100749.3	0.00306799	0.00958785	0.125014	0.00158918	0.00235983	-0.570397
ENSG00000161888	SPC24	ENSG00000161888.7	0.00382933	0.00963902	0.125233	0.00213423	0.0041719	-0.966989
ENSG00000110619	CARS	ENSG00000110619.12	0.0010129	0.00972078	0.125808	0.00300883	0.00418893	-0.477378
ENSG00000146833	TRIM4	ENSG00000146833.11	0.00168093	0.00980355	0.126392	0.000457392	0.0024748	-2.43581
ENSG00000169604	ANTXR1	ENSG00000169604.15	0.00241542	0.00983339	0.126436	0.00239483	0.00345237	-0.527662
ENSG00000137767	SQRDL	ENSG00000137767.9	0.00426836	0.00984469	0.126436	0.00321339	0.00684317	-1.09057
ENSG00000159335	PTMS	ENSG00000159335.11	0.00980261	0.00987457	0.126498	0.00651537	0.00981885	-0.591707
ENSG00000181090	EHMT1	ENSG00000181090.13	0.00338307	0.00993592	0.12696	0.00131806	0.00263839	-1.00123
ENSG00000105229	PIAS4	ENSG00000105229.2	0.00689918	0.00995915	0.127096	0.00160469	0.00424901	-1.40483
ENSG00000119922	IFIT2	ENSG00000119922.7	0.00322869	0.0101599	0.128806	0.0040769	0.00884002	-1.11658
ENSG00000103319	EEF2K	ENSG00000103319.7	0.00242299	0.0101699	0.128806	0.000797199	0.00260598	-1.70882
ENSG00000047365	ARAP2	ENSG00000047365.7	0.00461967	0.0104003	0.130868	0.000220571	0.00127098	-2.52663
ENSG00000125885	MCM8	ENSG00000125885.9	0.00324673	0.0104108	0.130868	0.000746844	0.00169195	-1.17981
ENSG00000112742	TTK	ENSG00000112742.5	0.00485857	0.0104434	0.130868	0.00146611	0.00247191	-0.753635
ENSG00000161714	PLCD3	ENSG00000161714.7	0.0142624	0.0104497	0.130868	0.000907049	0.00377164	-2.05594
ENSG00000001629	ANKIB1	ENSG00000001629.5	0.00262499	0.0104695	0.130953	0.000505891	0.00134755	-1.41344
ENSG00000197275	RAD54B	ENSG00000197275.8	0.00438215	0.0105416	0.131528	0.00179304	0.00375347	-1.06582
ENSG00000197712	FAM114A1	ENSG00000197712.7	0.00138253	0.0106937	0.132286	0.00299407	0.00444364	-0.569635
ENSG00000047410	TPR	ENSG00000047410.9	0.00254071	0.0106943	0.132286	0.00115325	0.0016877	-0.549359
ENSG00000145781	COMMD10	ENSG00000145781.4	0.00250908	0.0107293	0.132557	0.00219846	0.00392843	-0.837463
ENSG00000178217	SH2D4B	ENSG00000178217.9	0.00490114	0.010801	0.132628	0.752404	4.29088	-2.51169
ENSG00000145945	FAM50B	ENSG00000145945.5	0.010232	0.0108819	0.132973	0.00164799	0.0173748	-3.39821
ENSG00000254685	FPGT	ENSG00000254685.2	0.0031212	0.010966	0.133838	0.00131828	0.00278931	-1.08125
ENSG00000138386	NAB1	ENSG00000138386.12	0.00280858	0.0109972	0.134056	7.37604e-05	0.000921219	-3.64263
ENSG00000112769	LAMA4	ENSG00000112769.14	0.00259598	0.0111117	0.134799	0.00513391	0.00962996	-0.907473
ENSG00000139178	C1RL	ENSG00000139178.6	0.00540778	0.0111295	0.134853	0.000794208	0.00802835	-3.33751
ENSG00000170088	TMEM192	ENSG00000170088.9	0.00138744	0.0111461	0.134892	0.00195284	0.00359872	-0.881914
ENSG00000101224	CDC25B	ENSG00000101224.13	0.00261047	0.0113016	0.135795	0.00327571	0.0052993	-0.693994
ENSG00000029639	TFB1M	ENSG00000029639.6	0.00254843	0.0113324	0.135968	0.00239551	0.00601734	-1.32879
ENSG00000122966	CIT	ENSG00000122966.9	0.00208077	0.0114504	0.136443	0.00238267	0.00367824	-0.626437
ENSG00000131378	RFTN1	ENSG00000131378.9	0.00133788	0.0116133	0.137921	0.000647533	0.00179285	-1.46923
ENSG00000109113	RAB34	ENSG00000109113.13	0.00284917	0.0116156	0.137921	0.002053	0.00318152	-0.631985
ENSG00000174607	UGT8	ENSG00000174607.6	0.003886	0.0116303	0.137933	0.00287069	0.00669165	-1.22096
ENSG00000187239	FNBP1	ENSG00000187239.12	0.00220008	0.0117404	0.138749	0.000821273	0.00234223	-1.51195
ENSG00000203880	PCMTD2	ENSG00000203880.7	0.00184646	0.0117837	0.138934	0.000844415	0.00247392	-1.55077
ENSG00000231925	TAPBP	ENSG00000231925.7	0.00533277	0.011825	0.138965	0.00469253	0.00689545	-0.555278
ENSG00000167674	ENSG00000167674	ENSG00000167674.10	0.00497032	0.0118277	0.138965	0.00384092	0.0061208	-0.672267
ENSG00000186298	PPP1CC	ENSG00000186298.7	0.00345477	0.0118577	0.139155	0.00129107	0.00183216	-0.504985
ENSG00000130254	SAFB2	ENSG00000130254.7	0.00481828	0.0118914	0.13928	0.00241279	0.00393641	-0.70618
ENSG00000133704	IPO8	ENSG00000133704.5	0.00193117	0.0120792	0.140607	0.00137694	0.00294478	-1.09669
ENSG00000143369	ECM1	ENSG00000143369.10	0.00537285	0.0121084	0.140658	0.00424356	0.0128747	-1.60119
ENSG00000131944	FAAP24	ENSG00000131944.5	0.00246157	0.0121233	0.140658	0.00177725	0.00779868	-2.13358
ENSG00000167632	TRAPPC9	ENSG00000167632.10	0.00437793	0.0121554	0.140843	0.00108476	0.00267114	-1.30008
ENSG00000111331	OAS3	ENSG00000111331.8	0.00436893	0.0123307	0.142383	0.00174593	0.00959028	-2.45758
ENSG00000105011	ASF1B	ENSG00000105011.4	0.00223095	0.0123843	0.142511	0.0022175	0.00429454	-0.953571
ENSG00000065882	TBC1D1	ENSG00000065882.11	0.00130196	0.0124853	0.143182	0.000389585	0.000838227	-1.1054
ENSG00000113318	MSH3	ENSG00000113318.9	0.00283562	0.0125355	0.143225	0.00091589	0.00214171	-1.22552
ENSG00000075702	WDR62	ENSG00000075702.12	0.00279495	0.0125694	0.143225	0.00170084	0.00269404	-0.663522
ENSG00000255292	SDHD	ENSG00000255292.2	0.00437709	0.0125719	0.143225	0.000619135	0.00431105	-2.79971
ENSG00000138758	2017-09-11	ENSG00000138758.7	0.00261077	0.0125889	0.143225	0.00135111	0.00191802	-0.505479
ENSG00000140694	PARN	ENSG00000140694.12	0.0155541	0.0126002	0.143225	0.0236473	0.0356481	-0.592151
ENSG00000006715	VPS41	ENSG00000006715.11	0.00338988	0.0126145	0.143225	0.000679442	0.00184961	-1.4448
ENSG00000079332	SAR1A	ENSG00000079332.10	0.00202226	0.0126635	0.143533	0.00235238	0.0033032	-0.489746
ENSG00000130589	HELZ2	ENSG00000130589.12	0.00928437	0.0129298	0.145302	0.00117136	0.00321412	-1.45624
ENSG00000171475	WIPF2	ENSG00000171475.9	0.00347203	0.0130266	0.145604	0.000767286	0.00241039	-1.65143
ENSG00000119801	YPEL5	ENSG00000119801.8	0.00265775	0.0130441	0.145604	0.00131335	0.00320091	-1.28523
ENSG00000166881	NEMP1	ENSG00000166881.5	0.0026108	0.0131481	0.146285	0.00141924	0.00253394	-0.83627
ENSG00000130714	POMT1	ENSG00000130714.11	0.00465044	0.0132368	0.146785	0.00117599	0.0058741	-2.32049
ENSG00000130520	LSM4	ENSG00000130520.6	0.0198404	0.0132572	0.14685	0.0489196	0.0739988	-0.597089
ENSG00000124486	USP9X	ENSG00000124486.8	0.00153493	0.0133755	0.147835	0.000854358	0.0014611	-0.774141
ENSG00000136448	NMT1	ENSG00000136448.7	0.00178325	0.0134428	0.148253	0.00153162	0.00248977	-0.700958
ENSG00000237649	KIFC1	ENSG00000237649.3	0.00293064	0.0136677	0.15024	0.00317532	0.0049583	-0.642944
ENSG00000121691	CAT	ENSG00000121691.4	0.00182009	0.0137345	0.150482	0.00359513	0.00625925	-0.799946
ENSG00000143799	PARP1	ENSG00000143799.8	0.00112632	0.0141172	0.152848	0.0013083	0.00184952	-0.499462
ENSG00000078699	CBFA2T2	ENSG00000078699.17	0.00345851	0.014186	0.152954	0.00203754	0.00493296	-1.27563
ENSG00000112282	MED23	ENSG00000112282.13	0.00214636	0.014188	0.152954	0.00203922	0.00334369	-0.713426
ENSG00000153048	CARHSP1	ENSG00000153048.6	0.00591878	0.0142604	0.153243	0.00244525	0.00562764	-1.20255
ENSG00000135148	TRAFD1	ENSG00000135148.7	0.00193505	0.0143077	0.153423	0.00172919	0.00307108	-0.828651
ENSG00000071539	TRIP13	ENSG00000071539.9	0.00137865	0.0143535	0.153705	0.00217113	0.00353797	-0.70448
ENSG00000130816	DNMT1	ENSG00000130816.10	0.00124791	0.0143681	0.153705	0.0015498	0.00224643	-0.53555
ENSG00000124641	MED20	ENSG00000124641.10	0.00241584	0.0143798	0.153705	0.000696528	0.00236302	-1.76238
ENSG00000117691	NENF	ENSG00000117691.5	0.00357025	0.0144134	0.153737	0.00394862	0.00778976	-0.98023
ENSG00000165434	PGM2L1	ENSG00000165434.6	0.00224006	0.014491	0.154402	0.00110728	0.00439069	-1.98743
ENSG00000132478	UNK	ENSG00000132478.5	0.00257884	0.0146038	0.155281	0.000767915	0.00239262	-1.63957
ENSG00000134283	PPHLN1	ENSG00000134283.13	0.00204289	0.0146367	0.155328	0.00151493	0.00314446	-1.05357
ENSG00000066044	ELAVL1	ENSG00000066044.9	0.00260661	0.0146396	0.155328	0.00372105	0.00523381	-0.492151
ENSG00000116685	KIAA2013	ENSG00000116685.11	0.00415272	0.0148014	0.156714	0.00159305	0.00297349	-0.900371
ENSG00000154240	CEP112	ENSG00000154240.12	0.00530714	0.0148386	0.156867	0.00289617	0.0102542	-1.824
ENSG00000132356	PRKAA1	ENSG00000132356.7	0.00412751	0.0152602	0.160164	0.00155471	0.00216327	-0.476566
ENSG00000181744	C3orf58	ENSG00000181744.4	0.00226904	0.0153012	0.160164	0.00182133	0.00367565	-1.01301
ENSG00000111674	ENO2	ENSG00000111674.4	0.00293732	0.0153341	0.160164	0.00378209	0.00721599	-0.932015
ENSG00000183876	ARSI	ENSG00000183876.8	0.133034	0.0153578	0.160246	4.35599	12.6052	-1.53294
ENSG00000084444	FAM234B	ENSG00000084444.9	0.00185543	0.015484	0.160731	0.00239634	0.00797365	-1.73441
ENSG00000104889	RNASEH2A	ENSG00000104889.4	0.00242202	0.0155368	0.160914	0.00514415	0.00776855	-0.594712
ENSG00000169599	NFU1	ENSG00000169599.8	0.00246839	0.0155417	0.160914	0.00192346	0.00375299	-0.964334
ENSG00000214022	REPIN1	ENSG00000214022.7	0.00661352	0.0156006	0.161112	0.000951839	0.00237385	-1.31844
ENSG00000145715	RASA1	ENSG00000145715.10	0.00291204	0.0156826	0.161112	0.00160101	0.0024476	-0.612389
ENSG00000159593	NAE1	ENSG00000159593.10	0.00326008	0.0157714	0.161112	0.00169358	0.0028683	-0.760118
ENSG00000203760	CENPW	ENSG00000203760.4	0.0014063	0.0157755	0.161112	0.00697527	0.0111966	-0.682736
ENSG00000077097	TOP2B	ENSG00000077097.9	0.00253852	0.0157879	0.161112	0.00144635	0.00207742	-0.522378
ENSG00000176619	LMNB2	ENSG00000176619.6	0.0151864	0.0158075	0.161112	0.00177349	0.00294724	-0.732774
ENSG00000125484	GTF3C4	ENSG00000125484.7	0.00118079	0.0158368	0.161112	0.00111142	0.00181403	-0.7068
ENSG00000164109	MAD2L1	ENSG00000164109.9	0.00372107	0.0158416	0.161112	0.00219744	0.00341365	-0.635489
ENSG00000100242	SUN2	ENSG00000100242.11	0.00807819	0.0158487	0.161112	0.0070217	0.0105961	-0.593641
ENSG00000113389	NPR3	ENSG00000113389.11	0.00297617	0.0158807	0.161192	0.00173118	0.00497658	-1.5234
ENSG00000156521	TYSND1	ENSG00000156521.9	0.00633351	0.0160211	0.162205	0.00122865	0.0050027	-2.02563
ENSG00000036054	TBC1D23	ENSG00000036054.8	0.00359871	0.016185	0.162966	0.00144443	0.00249188	-0.786733
ENSG00000166965	RCCD1	ENSG00000166965.8	0.00460743	0.0163763	0.164128	0.0014842	0.00297188	-1.00169
ENSG00000122359	ANXA11	ENSG00000122359.13	0.00329808	0.0164021	0.164128	0.00301914	0.00446893	-0.565793
ENSG00000198945	L3MBTL3	ENSG00000198945.3	0.00168097	0.0164537	0.164128	0.00201944	0.00531476	-1.39605
ENSG00000187555	USP7	ENSG00000187555.10	0.00265426	0.0164796	0.164128	0.00153132	0.00226357	-0.563824
ENSG00000176390	CRLF3	ENSG00000176390.10	0.00271132	0.0165719	0.164574	0.000707065	0.00235013	-1.73283
ENSG00000092036	HAUS4	ENSG00000092036.12	0.00364641	0.0166254	0.164606	0.00135615	0.00359673	-1.40717
ENSG00000136636	KCTD3	ENSG00000136636.8	0.00298204	0.0166847	0.164662	0.00115568	0.00228673	-0.984546
ENSG00000100299	ARSA	ENSG00000100299.13	0.00915138	0.0167354	0.164662	0.00469457	0.0109576	-1.22287
ENSG00000204634	TBC1D8	ENSG00000204634.8	0.00316951	0.0169497	0.166036	0.00136047	0.00476799	-1.80928
ENSG00000196611	MMP1	ENSG00000196611.4	0.0042857	0.0169516	0.166036	0.000927052	0.00200681	-1.11419
ENSG00000124201	ZNFX1	ENSG00000124201.10	0.00112043	0.0171031	0.16635	0.00167816	0.00226565	-0.433047
ENSG00000270800	RPS10-NUDT3	ENSG00000270800.1	0.00426698	0.0171052	0.16635	0.000265798	0.000618157	-1.21764
ENSG00000171988	JMJD1C	ENSG00000171988.13	0.0032022	0.0171227	0.16635	0.000744655	0.00134243	-0.850205
ENSG00000162341	TPCN2	ENSG00000162341.11	0.00453104	0.0171324	0.16635	0.0020346	0.00536004	-1.3975
ENSG00000214087	ARL16	ENSG00000214087.4	0.00231105	0.0171488	0.16635	0.00141265	0.00337085	-1.2547
ENSG00000100883	SRP54	ENSG00000100883.7	0.00267296	0.0173228	0.167554	0.00258457	0.00431375	-0.739017
ENSG00000140199	SLC12A6	ENSG00000140199.7	0.00334311	0.0174189	0.167999	0.00311917	0.00668732	-1.10027
ENSG00000178202	KDELC2	ENSG00000178202.8	0.00249372	0.0176989	0.169241	0.0029686	0.00419849	-0.500087
ENSG00000087157	PGS1	ENSG00000087157.14	0.00214149	0.0177253	0.169333	0.0012586	0.00311643	-1.30807
ENSG00000037042	TUBG2	ENSG00000037042.8	0.00167903	0.017807	0.16963	0.00106173	0.00338447	-1.67251
ENSG00000054118	THRAP3	ENSG00000054118.9	0.00118655	0.0183315	0.172182	0.00117265	0.00174778	-0.575757
ENSG00000163728	TTC14	ENSG00000163728.6	0.00348647	0.0183535	0.172229	0.000529148	0.00145348	-1.45777
ENSG00000149761	NUDT22	ENSG00000149761.4	0.00957536	0.0184349	0.172511	0.00145259	0.00351325	-1.27418
ENSG00000148773	MKI67	ENSG00000148773.8	0.00269091	0.0185412	0.172713	0.00093184	0.00131545	-0.497399
ENSG00000241973	PI4KA	ENSG00000241973.6	0.00304789	0.0185862	0.172713	0.00192378	0.0033562	-0.802888
ENSG00000180104	EXOC3	ENSG00000180104.11	0.00225451	0.0186059	0.172713	0.00169696	0.00308751	-0.863492
ENSG00000165006	UBAP1	ENSG00000165006.9	0.00157534	0.0187572	0.17359	0.00117866	0.00185999	-0.658152
ENSG00000100243	CYB5R3	ENSG00000100243.16	0.00644402	0.0187865	0.173702	0.0104798	0.0142665	-0.445021
ENSG00000160221	C21orf33	ENSG00000160221.12	0.00311044	0.0189962	0.175319	0.0018341	0.00422122	-1.20259
ENSG00000156026	MCU	ENSG00000156026.10	0.00273236	0.0193844	0.178248	0.00197302	0.0039171	-0.989376
ENSG00000164199	ADGRV1	ENSG00000164199.11	0.00193996	0.0194768	0.178614	0.00481934	0.00858442	-0.832884
ENSG00000144810	COL8A1	ENSG00000144810.11	0.00149189	0.0195256	0.178892	0.00416969	0.00595079	-0.513141
ENSG00000162066	AMDHD2	ENSG00000162066.10	0.014369	0.0195439	0.178898	0.00194589	0.00486155	-1.32098
ENSG00000124786	SLC35B3	ENSG00000124786.8	0.0018055	0.0199872	0.181255	0.00148076	0.00403062	-1.44466
ENSG00000005302	MSL3	ENSG00000005302.13	0.00177257	0.0199987	0.181255	0.000908207	0.00203096	-1.16107
ENSG00000260238	PMF1-BGLAP	ENSG00000260238.1	0.00332768	0.0203895	0.182816	0.00285389	0.00645111	-1.17662
ENSG00000177469	PTRF	ENSG00000177469.12	0.00707445	0.02042	0.182926	0.00212229	0.00281553	-0.407784
ENSG00000154429	CCSAP	ENSG00000154429.6	0.00246566	0.0205382	0.183247	0.000782585	0.00259496	-1.72939
ENSG00000170412	GPRC5C	ENSG00000170412.12	0.0536433	0.0205383	0.183247	3.14557	7.11764	-1.17808
ENSG00000107758	PPP3CB	ENSG00000107758.11	0.00373904	0.0205468	0.183247	0.0014592	0.00239251	-0.71335
ENSG00000125450	NUP85	ENSG00000125450.6	0.00143493	0.0206589	0.183731	0.0025817	0.00387521	-0.585953
ENSG00000163069	SGCB	ENSG00000163069.8	0.00299414	0.0207266	0.184035	0.00363794	0.00552461	-0.602748
ENSG00000130559	CAMSAP1	ENSG00000130559.14	0.00152028	0.0209264	0.185319	0.000749094	0.00157529	-1.0724
ENSG00000111206	FOXM1	ENSG00000111206.8	0.00184761	0.0210148	0.185612	0.00107278	0.00168395	-0.650491
ENSG00000138029	HADHB	ENSG00000138029.9	0.00148153	0.0213037	0.186922	0.00412308	0.00619916	-0.588352
ENSG00000140391	TSPAN3	ENSG00000140391.10	0.0013539	0.0213069	0.186922	0.0033952	0.00480303	-0.500448
ENSG00000204351	SKIV2L	ENSG00000204351.7	0.00521538	0.0213258	0.186922	0.00220166	0.00361278	-0.714518
ENSG00000120868	APAF1	ENSG00000120868.9	0.00477102	0.0213858	0.186922	0.00278813	0.00548789	-0.976956
ENSG00000135638	EMX1	ENSG00000135638.9	0.00644575	0.0214384	0.1871	0.0942811	0.456453	-2.27543
ENSG00000111011	RSRC2	ENSG00000111011.13	0.00208832	0.0216632	0.188691	0.00209755	0.00297511	-0.504238
ENSG00000127418	FGFRL1	ENSG00000127418.10	0.00331938	0.0216998	0.188795	0.00144649	0.00333998	-1.20729
ENSG00000163704	PRRT3	ENSG00000163704.7	0.0105224	0.0217127	0.188795	0.00075556	0.00793331	-3.3923
ENSG00000142207	URB1	ENSG00000142207.5	0.00130447	0.0220071	0.190831	0.00133792	0.00218688	-0.708877
ENSG00000050426	LETMD1	ENSG00000050426.11	0.00138029	0.0220195	0.190831	0.00145659	0.00331767	-1.18758
ENSG00000133104	SPG20	ENSG00000133104.8	0.00348745	0.0221676	0.191739	0.00138202	0.0025451	-0.880944
ENSG00000102897	LYRM1	ENSG00000102897.5	0.00250956	0.0222001	0.191739	0.00121417	0.00378273	-1.63945
ENSG00000075856	SART3	ENSG00000075856.7	0.00129863	0.0224848	0.193669	0.00166414	0.00263267	-0.661753
ENSG00000158773	USF1	ENSG00000158773.10	0.00328987	0.02255	0.193917	0.000993902	0.00268776	-1.43523
ENSG00000011009	LYPLA2	ENSG00000011009.6	0.00825002	0.0226577	0.194162	0.000630815	0.00157849	-1.32326
ENSG00000166897	ELFN2	ENSG00000166897.10	0.0116108	0.0227232	0.194392	0.00197637	0.00760688	-1.94445
ENSG00000170759	KIF5B	ENSG00000170759.10	0.00277055	0.0228486	0.194803	0.00107646	0.00145694	-0.436652
ENSG00000107951	MTPAP	ENSG00000107951.8	0.00118285	0.0230181	0.195916	0.0010513	0.00235337	-1.16255
ENSG00000100605	ITPK1	ENSG00000100605.12	0.00422902	0.0230519	0.196039	0.00118005	0.0028275	-1.26068
ENSG00000146872	TLK2	ENSG00000146872.13	0.00287248	0.0231189	0.196331	0.000301546	0.0010999	-1.86693
ENSG00000090889	KIF4A	ENSG00000090889.10	0.00118578	0.0231253	0.196331	0.000881494	0.00165475	-0.908595
ENSG00000115839	RAB3GAP1	ENSG00000115839.13	0.00265623	0.0231485	0.196362	0.00219366	0.00315897	-0.526114
ENSG00000037757	MRI1	ENSG00000037757.9	0.00183794	0.0232432	0.196803	0.00163725	0.00373163	-1.18853
ENSG00000116350	SRSF4	ENSG00000116350.11	0.00241309	0.023259	0.196803	0.00247497	0.00365021	-0.560568
ENSG00000164944	KIAA1429	ENSG00000164944.7	0.00206653	0.0233522	0.196975	0.00179286	0.00256234	-0.515196
ENSG00000144554	FANCD2	ENSG00000144554.6	0.00248887	0.0233772	0.196975	0.00178921	0.0033746	-0.915395
ENSG00000204387	C6orf48	ENSG00000204387.8	0.00456547	0.023475	0.197469	0.00113743	0.00183507	-0.69006
ENSG00000139725	RHOF	ENSG00000139725.3	0.00529887	0.0236422	0.198077	0.00126712	0.00381537	-1.59027
ENSG00000131844	MCCC2	ENSG00000131844.11	0.00209719	0.0236443	0.198077	0.00161356	0.00280228	-0.796355
ENSG00000166949	SMAD3	ENSG00000166949.11	0.00117248	0.0237021	0.19822	0.00209336	0.00332896	-0.669253
ENSG00000142544	CTU1	ENSG00000142544.6	0.0177472	0.0237746	0.198276	0.00469929	0.0134009	-1.51182
ENSG00000175183	CSRP2	ENSG00000175183.5	0.00270306	0.0238006	0.198276	0.00194745	0.00654215	-1.74818
ENSG00000091542	ALKBH5	ENSG00000091542.8	0.00403677	0.0238095	0.198276	0.000381902	0.000811621	-1.0876
ENSG00000143850	PLEKHA6	ENSG00000143850.8	0.00486716	0.0239573	0.198867	0.000802791	0.00296967	-1.88721
ENSG00000005175	RPAP3	ENSG00000005175.5	0.00414869	0.0240053	0.199102	0.00160165	0.00258314	-0.68957
ENSG00000110367	DDX6	ENSG00000110367.7	0.00129461	0.0241937	0.200393	0.00171854	0.00239056	-0.476167
ENSG00000104361	NIPAL2	ENSG00000104361.5	0.00335089	0.0242102	0.200393	0.000434876	0.0017963	-2.04636
ENSG00000221829	FANCG	ENSG00000221829.5	0.00278907	0.024264	0.200421	0.00159154	0.00282686	-0.828778
ENSG00000146904	EPHA1	ENSG00000146904.4	0.00377995	0.0242945	0.200509	0.00200972	0.00443113	-1.14068
ENSG00000042445	RETSAT	ENSG00000042445.9	0.00305982	0.024389	0.201125	0.00285906	0.00457884	-0.679441
ENSG00000150967	ABCB9	ENSG00000150967.13	0.00865196	0.0249301	0.204439	0.00294421	0.00506464	-0.782581
ENSG00000255439	ENSG00000255439	ENSG00000255439.2	0.00273662	0.0252626	0.205483	0.011901	0.015939	-0.421482
ENSG00000137770	CTDSPL2	ENSG00000137770.9	0.0037139	0.0252794	0.205483	0.00075248	0.00141186	-0.907872
ENSG00000125347	IRF1	ENSG00000125347.9	0.0032688	0.0253334	0.205483	0.00228917	0.0039612	-0.791117
ENSG00000196747	HIST1H2AI	ENSG00000196747.3	0.00823413	0.0253567	0.205483	0.00514652	0.00701755	-0.44737
ENSG00000169410	PTPN9	ENSG00000169410.5	0.00161816	0.0255156	0.205866	0.000645931	0.00184918	-1.51743
ENSG00000260916	CCPG1	ENSG00000260916.1	0.00568555	0.025532	0.205866	0.00445646	0.00662721	-0.572502
ENSG00000123066	MED13L	ENSG00000123066.3	0.00144561	0.0255432	0.205866	0.000343551	0.000709169	-1.0456
ENSG00000106009	BRAT1	ENSG00000106009.11	0.00858458	0.02576	0.20717	0.0031441	0.00533482	-0.762791
ENSG00000177239	MAN1B1	ENSG00000177239.10	0.00440178	0.0258333	0.207351	0.00472302	0.00708366	-0.584786
ENSG00000117020	AKT3	ENSG00000117020.12	0.00169627	0.0259158	0.20739	0.000680465	0.00109742	-0.689516
ENSG00000168394	TAP1	ENSG00000168394.9	0.0038578	0.02595	0.20739	0.00319772	0.00560549	-0.809797
ENSG00000044459	CNTLN	ENSG00000044459.10	0.00380132	0.0261363	0.208201	0.000845481	0.00192509	-1.18708
ENSG00000269881	ENSG00000269881	ENSG00000269881.1	0.00610805	0.0261592	0.208219	0.00390685	0.00836713	-1.09873
ENSG00000151500	THYN1	ENSG00000151500.10	0.00314009	0.0263436	0.209356	0.000603058	0.00253802	-2.07333
ENSG00000090487	SPG21	ENSG00000090487.6	0.000983855	0.0263833	0.209506	0.00138922	0.00283595	-1.02956
ENSG00000157557	ETS2	ENSG00000157557.7	0.00243019	0.026709	0.210172	0.0011703	0.0024669	-1.07581
ENSG00000198837	DENND4B	ENSG00000198837.5	0.00377151	0.0267477	0.210172	0.000480469	0.00148867	-1.63151
ENSG00000159459	UBR1	ENSG00000159459.7	0.00294137	0.0267668	0.210172	0.00124649	0.00206367	-0.727343
ENSG00000128487	SPECC1	ENSG00000128487.12	0.00120556	0.0267674	0.210172	0.0010021	0.00200318	-0.99927
ENSG00000197860	SGTB	ENSG00000197860.5	0.00236962	0.0267734	0.210172	0.000667505	0.00190337	-1.51171
ENSG00000110497	AMBRA1	ENSG00000110497.10	0.00284072	0.0268012	0.210172	0.00113948	0.00284724	-1.32119
ENSG00000101400	SNTA1	ENSG00000101400.5	0.00965648	0.0268748	0.210421	0.00141098	0.00548318	-1.95832
ENSG00000272325	NUDT3	ENSG00000272325.1	0.000894316	0.0269051	0.210495	0.000271218	0.000529034	-0.963908
ENSG00000125970	RALY	ENSG00000125970.7	0.00642464	0.0271305	0.210767	0.00328832	0.00472777	-0.523807
ENSG00000187676	B3GLCT	ENSG00000187676.7	0.00282666	0.0272668	0.211192	0.0020297	0.00464444	-1.19424
ENSG00000149311	ATM	ENSG00000149311.13	0.00369104	0.0276616	0.212875	0.000740994	0.00156456	-1.07822
ENSG00000166224	SGPL1	ENSG00000166224.12	0.00187624	0.0276782	0.212875	0.00169538	0.00285036	-0.749538
ENSG00000142687	KIAA0319L	ENSG00000142687.13	0.00208369	0.0277662	0.212875	0.00262928	0.00397431	-0.596034
ENSG00000111707	SUDS3	ENSG00000111707.7	0.00327399	0.0277801	0.212875	0.000315674	0.000984137	-1.64042
ENSG00000007545	CRAMP1	ENSG00000007545.11	0.00238078	0.02782	0.213019	0.000659554	0.00239712	-1.86174
ENSG00000074219	TEAD2	ENSG00000074219.9	0.00404344	0.0278446	0.213045	0.00102228	0.00447096	-2.12879
ENSG00000111247	RAD51AP1	ENSG00000111247.10	0.00277789	0.0278718	0.213091	0.000901411	0.00196481	-1.12413
ENSG00000198919	DZIP3	ENSG00000198919.8	0.00406338	0.0279283	0.2132	0.00213484	0.00378581	-0.826477
ENSG00000198087	CD2AP	ENSG00000198087.7	0.004176	0.0282219	0.214714	0.000922592	0.00141289	-0.614889
ENSG00000126391	FRMD8	ENSG00000126391.9	0.0086657	0.0284203	0.215752	0.000639229	0.00183612	-1.52226
ENSG00000151474	FRMD4A	ENSG00000151474.15	0.00153705	0.0285469	0.216282	0.000987458	0.00208849	-1.08067
ENSG00000169692	AGPAT2	ENSG00000169692.8	0.00842396	0.0287059	0.217323	0.00849558	0.0187384	-1.14122
ENSG00000168610	STAT3	ENSG00000168610.10	0.00164608	0.0288234	0.217722	0.00140797	0.00259611	-0.882737
ENSG00000161800	RACGAP1	ENSG00000161800.8	0.00181718	0.0289566	0.2184	0.00205012	0.00306312	-0.57929
ENSG00000035681	NSMAF	ENSG00000035681.3	0.00271387	0.0291248	0.218759	0.00114682	0.00185996	-0.697635
ENSG00000196754	S100A2	ENSG00000196754.6	0.00297762	0.0292805	0.218759	0.00183701	0.0060077	-1.70945
ENSG00000140718	FTO	ENSG00000140718.14	0.00141525	0.0295169	0.219989	0.00150828	0.00248095	-0.717989
ENSG00000151292	CSNK1G3	ENSG00000151292.13	0.00331681	0.02971	0.220775	0.000711985	0.00154192	-1.11481
ENSG00000163611	SPICE1	ENSG00000163611.7	0.00495688	0.0298124	0.22098	0.000882363	0.00235559	-1.41665
ENSG00000125779	PANK2	ENSG00000125779.17	0.00238341	0.0298358	0.22098	0.00120487	0.00227114	-0.914535
ENSG00000144724	PTPRG	ENSG00000144724.14	0.00166559	0.0298679	0.22098	0.00204438	0.00271262	-0.408026
ENSG00000270024	C8orf44-SGK3	ENSG00000270024.1	0.00365546	0.0298971	0.22098	0.000721386	0.00221369	-1.61761
ENSG00000072609	CHFR	ENSG00000072609.13	0.00310796	0.0299105	0.22098	0.0013088	0.00674185	-2.3649
ENSG00000183751	TBL3	ENSG00000183751.10	0.00679758	0.0300246	0.221491	0.00193506	0.00338584	-0.807132
ENSG00000132763	MMACHC	ENSG00000132763.10	0.00216537	0.0300356	0.221491	0.000347534	0.00115991	-1.73879
ENSG00000126432	PRDX5	ENSG00000126432.9	0.00634231	0.0300715	0.221499	0.00341186	0.00569413	-0.738917
ENSG00000048828	FAM120A	ENSG00000048828.12	0.00107297	0.0301162	0.221666	0.00125622	0.00166512	-0.406537
ENSG00000198924	DCLRE1A	ENSG00000198924.3	0.00346637	0.0302007	0.222098	0.000306375	0.00132673	-2.11451
ENSG00000135828	RNASEL	ENSG00000135828.7	0.00532782	0.0309728	0.225662	0.0050876	0.0115305	-1.1804
ENSG00000123146	ADGRE5	ENSG00000123146.15	0.00754137	0.0310494	0.225893	0.0106006	0.0147179	-0.47342
ENSG00000074266	EED	ENSG00000074266.13	0.00158828	0.0311571	0.226187	0.00193717	0.0043502	-1.16713
ENSG00000154358	OBSCN	ENSG00000154358.15	0.00668808	0.0313879	0.227195	0.00187009	0.00510665	-1.44927
ENSG00000116698	SMG7	ENSG00000116698.16	0.0057002	0.0313918	0.227195	0.000589817	0.00142878	-1.27644
ENSG00000153395	LPCAT1	ENSG00000153395.5	0.00184706	0.0314088	0.227195	0.00361211	0.00556586	-0.623762
ENSG00000101347	SAMHD1	ENSG00000101347.7	0.00201357	0.0314851	0.227584	0.00187913	0.00309775	-0.721159
ENSG00000111348	ARHGDIB	ENSG00000111348.4	0.0014813	0.0315091	0.227593	0.00131663	0.0026675	-1.01864
ENSG00000119397	CNTRL	ENSG00000119397.12	0.00150001	0.0319157	0.229565	0.00117313	0.00206946	-0.818887
ENSG00000136999	NOV	ENSG00000136999.4	0.00306648	0.0321189	0.230238	0.00420911	0.0106754	-1.3427
ENSG00000101577	LPIN2	ENSG00000101577.5	0.00130057	0.0321496	0.230238	0.00132264	0.00202354	-0.613454
ENSG00000159063	ALG8	ENSG00000159063.8	0.00220784	0.032348	0.231002	0.00545138	0.00867333	-0.669964
ENSG00000115415	STAT1	ENSG00000115415.14	0.00183409	0.0324218	0.231364	0.00185374	0.00261118	-0.49426
ENSG00000067066	SP100	ENSG00000067066.12	0.00280034	0.032598	0.23203	0.00156851	0.00266257	-0.763426
ENSG00000121621	KIF18A	ENSG00000121621.6	0.00515407	0.0326761	0.232097	0.00133708	0.0020288	-0.601539
ENSG00000148358	GPR107	ENSG00000148358.15	0.00168024	0.0327091	0.232099	0.00256051	0.00373807	-0.545863
ENSG00000138134	STAMBPL1	ENSG00000138134.7	0.00364865	0.0327969	0.232558	0.000809665	0.00200274	-1.30658
ENSG00000143882	ATP6V1C2	ENSG00000143882.5	0.00181012	0.0329053	0.233094	0.00201045	0.00320434	-0.67251
ENSG00000134899	ERCC5	ENSG00000134899.13	0.00164793	0.0329419	0.233094	0.00129999	0.00298311	-1.19832
ENSG00000101346	POFUT1	ENSG00000101346.7	0.00164717	0.0330382	0.233149	0.00199308	0.00277645	-0.478243
ENSG00000164961	WASHC5	ENSG00000164961.11	0.00164915	0.03313	0.23344	0.00173268	0.00268003	-0.629245
ENSG00000121060	TRIM25	ENSG00000121060.10	0.00302543	0.0332188	0.23364	0.00134824	0.00193415	-0.52062
ENSG00000144320	LNPK	ENSG00000144320.9	0.00205036	0.0336054	0.235308	0.00110789	0.00178454	-0.687734
ENSG00000144040	SFXN5	ENSG00000144040.8	0.00556392	0.0336535	0.235481	0.00044282	0.00164465	-1.89299
ENSG00000141699	FAM134C	ENSG00000141699.6	0.00311952	0.033993	0.237214	0.00205381	0.00326196	-0.667436
ENSG00000169398	PTK2	ENSG00000169398.15	0.0018879	0.0339954	0.237214	0.00134294	0.00182932	-0.445914
ENSG00000187097	ENTPD5	ENSG00000187097.8	0.00152489	0.0340992	0.237588	0.00159912	0.00281956	-0.818191
ENSG00000096654	ZNF184	ENSG00000096654.11	0.0034173	0.0341448	0.237588	0.000916324	0.0026968	-1.55732
ENSG00000156970	BUB1B	ENSG00000156970.8	0.00173404	0.03424	0.2376	0.00147984	0.00235777	-0.671979
ENSG00000081923	ATP8B1	ENSG00000081923.6	0.00381989	0.0343909	0.238028	0.000863113	0.00273413	-1.66346
ENSG00000136811	ODF2	ENSG00000136811.12	0.000926636	0.0344723	0.238028	0.00135775	0.00239144	-0.816658
ENSG00000188483	IER5L	ENSG00000188483.6	0.0169694	0.0344998	0.238028	0.00777596	0.0136082	-0.807388
ENSG00000144283	PKP4	ENSG00000144283.17	0.00105758	0.0345233	0.238028	0.000449602	0.000788556	-0.810565
ENSG00000136247	ZDHHC4	ENSG00000136247.10	0.00231553	0.0345657	0.238028	0.00193732	0.00418008	-1.10947
ENSG00000131724	IL13RA1	ENSG00000131724.6	0.00294059	0.0348109	0.23942	0.00239915	0.00382449	-0.672745
ENSG00000160783	PMF1	ENSG00000160783.15	0.00284689	0.034861	0.239553	0.00201236	0.00401921	-0.998023
ENSG00000143643	TTC13	ENSG00000143643.8	0.00354791	0.0349017	0.239553	0.00290428	0.00661433	-1.18741
ENSG00000253846	PCDHGA10	ENSG00000253846.1	0.0022182	0.0352394	0.240419	0.00141802	0.00256655	-0.855947
ENSG00000166452	AKIP1	ENSG00000166452.7	0.00211845	0.0353324	0.240572	0.00311868	0.00500365	-0.682047
ENSG00000143614	GATAD2B	ENSG00000143614.7	0.00232011	0.0353368	0.240572	0.00304079	0.00495945	-0.705735
ENSG00000186153	WWOX	ENSG00000186153.12	0.00231001	0.0357204	0.242127	0.00347426	0.00839341	-1.27255
ENSG00000185130	HIST1H2BL	ENSG00000185130.4	0.00563354	0.0357562	0.242127	0.000895452	0.00166205	-0.892276
ENSG00000105254	TBCB	ENSG00000105254.7	0.00456648	0.0363873	0.244535	0.0046572	0.0064461	-0.468963
ENSG00000155090	KLF10	ENSG00000155090.10	0.00171059	0.0366938	0.245495	0.00175888	0.00244917	-0.477634
ENSG00000133895	MEN1	ENSG00000133895.10	0.00534262	0.0367962	0.24585	0.0042698	0.00612273	-0.520008
ENSG00000137845	ADAM10	ENSG00000137845.10	0.00303184	0.0368794	0.24585	0.00364515	0.00509891	-0.484213
ENSG00000101639	CEP192	ENSG00000101639.14	0.00185686	0.0369178	0.24585	0.000691689	0.00165388	-1.25766
ENSG00000133216	EPHB2	ENSG00000133216.12	0.00307859	0.0370839	0.24663	0.00293418	0.00400237	-0.447897
ENSG00000163655	GMPS	ENSG00000163655.11	0.00264186	0.0373981	0.247973	0.00159965	0.00219285	-0.455046
ENSG00000259075	POC1B-GALNT4	ENSG00000259075.2	0.00212701	0.0374911	0.248151	0.00171584	0.00375214	-1.1288
ENSG00000170689	HOXB9	ENSG00000170689.8	0.0020155	0.037575	0.248295	0.000543368	0.00149032	-1.45562
ENSG00000204264	PSMB8	ENSG00000204264.4	0.00388907	0.0377981	0.249221	0.00234619	0.00423279	-0.85129
ENSG00000002549	LAP3	ENSG00000002549.8	0.00177973	0.0378275	0.249221	0.00156361	0.00248681	-0.66942
ENSG00000126778	SIX1	ENSG00000126778.7	0.00211389	0.0380648	0.250179	0.00330592	0.00725372	-1.13367
ENSG00000111237	VPS29	ENSG00000111237.14	0.0029244	0.0381373	0.250354	0.00338146	0.00516989	-0.612486
ENSG00000178404	CEP295NL	ENSG00000178404.5	0.00359169	0.0381509	0.250354	0.019665	0.027589	-0.488463
ENSG00000014164	ZC3H3	ENSG00000014164.6	0.00891694	0.0382555	0.250354	0.00129334	0.0033953	-1.39243
ENSG00000103018	CYB5B	ENSG00000103018.12	0.00149402	0.0383089	0.250354	0.00116956	0.00191627	-0.71233
ENSG00000141664	ZCCHC2	ENSG00000141664.5	0.0025204	0.0383434	0.250354	0.000956216	0.00462093	-2.27278
ENSG00000185055	EFCAB10	ENSG00000185055.6	0.005682	0.0385832	0.25045	0.00087561	0.00406521	-2.21497
ENSG00000262576	PCDHGA4	ENSG00000262576.1	0.00188674	0.0386628	0.25045	0.00159525	0.00268631	-0.751844
ENSG00000072864	NDE1	ENSG00000072864.8	0.00249124	0.0386718	0.25045	0.00211389	0.00342002	-0.694105
ENSG00000103479	RBL2	ENSG00000103479.10	0.00299109	0.0386781	0.25045	0.00103142	0.00231565	-1.16679
ENSG00000150712	MTMR12	ENSG00000150712.6	0.00177825	0.0391008	0.252533	0.000250758	0.000853166	-1.76653
ENSG00000096092	TMEM14A	ENSG00000096092.5	0.00393612	0.0391024	0.252533	0.00699931	0.0100348	-0.519728
ENSG00000129195	FAM64A	ENSG00000129195.11	0.0039072	0.0392868	0.253251	0.00143928	0.00317184	-1.13998
ENSG00000197150	ABCB8	ENSG00000197150.8	0.00304856	0.039386	0.253728	0.00459789	0.0085531	-0.895475
ENSG00000108389	MTMR4	ENSG00000108389.5	0.000982	0.039628	0.254961	0.000949085	0.00151033	-0.670255
ENSG00000197142	ACSL5	ENSG00000197142.6	0.00302826	0.0398282	0.256085	0.00306194	0.00453337	-0.566137
ENSG00000128731	HERC2	ENSG00000128731.11	0.00299171	0.0398691	0.256185	0.000711367	0.00120853	-0.764591
ENSG00000155393	HEATR3	ENSG00000155393.8	0.00203696	0.0400082	0.256455	0.00105372	0.0020965	-0.992482
ENSG00000163644	PPM1K	ENSG00000163644.10	0.00597868	0.0400516	0.256539	0.000732787	0.00228376	-1.63995
ENSG00000188486	H2AFX	ENSG00000188486.3	0.0147593	0.040114	0.256776	0.00789378	0.0115265	-0.54617
ENSG00000164880	INTS1	ENSG00000164880.11	0.00765162	0.0402003	0.256943	0.00208945	0.00314863	-0.591599
ENSG00000171456	ASXL1	ENSG00000171456.12	0.000970697	0.0403155	0.257085	0.00162208	0.00222229	-0.454209
ENSG00000125971	DYNLRB1	ENSG00000125971.12	0.00104592	0.0406413	0.258181	0.0028451	0.00415226	-0.545413
ENSG00000140743	CDR2	ENSG00000140743.3	0.00235332	0.0407294	0.258311	0.000976661	0.00200377	-1.03679
ENSG00000184371	CSF1	ENSG00000184371.9	0.00448513	0.0407711	0.258354	0.00492872	0.00910949	-0.886157
ENSG00000135842	FAM129A	ENSG00000135842.12	0.00109635	0.0411654	0.259887	0.00218843	0.00313275	-0.51753
ENSG00000197386	HTT	ENSG00000197386.6	0.00326911	0.0411808	0.259887	0.00185684	0.00296971	-0.677474
ENSG00000168078	PBK	ENSG00000168078.5	0.00212253	0.0412195	0.259887	0.00335466	0.00494232	-0.559021
ENSG00000142102	PGGHG	ENSG00000142102.11	0.00747156	0.0415397	0.260822	0.000501884	0.00221205	-2.13996
ENSG00000165688	PMPCA	ENSG00000165688.7	0.00233303	0.0417394	0.261649	0.00346528	0.00503677	-0.539527
ENSG00000071794	HLTF	ENSG00000071794.11	0.00329404	0.0417588	0.261649	0.00135706	0.00186485	-0.458574
ENSG00000135766	EGLN1	ENSG00000135766.8	0.00122203	0.041943	0.262467	0.000906923	0.00152554	-0.750264
ENSG00000146072	TNFRSF21	ENSG00000146072.6	0.00186016	0.0419774	0.262467	0.00183362	0.0028591	-0.640869
ENSG00000102081	FMR1	ENSG00000102081.9	0.00291507	0.0425075	0.264857	0.000749821	0.00203754	-1.44221
ENSG00000166716	ZNF592	ENSG00000166716.5	0.00182093	0.0426591	0.265193	0.000296494	0.00107489	-1.85811
ENSG00000121578	B4GALT4	ENSG00000121578.8	0.00239022	0.0426842	0.265193	0.00517682	0.00811235	-0.648056
ENSG00000171126	KCNG3	ENSG00000171126.7	0.00592661	0.0426932	0.265193	0.304354	0.604241	-0.989375
ENSG00000117000	RLF	ENSG00000117000.8	0.00297193	0.042766	0.265482	0.0011124	0.00177429	-0.673561
ENSG00000108312	UBTF	ENSG00000108312.10	0.00207941	0.0432234	0.267496	0.00132595	0.0019078	-0.524882
ENSG00000164168	TMEM184C	ENSG00000164168.3	0.00282165	0.0433254	0.267963	0.00163979	0.00283796	-0.791343
ENSG00000115648	MLPH	ENSG00000115648.9	0.00266329	0.0433668	0.268054	0.00208861	0.00312632	-0.581923
ENSG00000100815	TRIP11	ENSG00000100815.8	0.00366591	0.0437481	0.268944	0.00173284	0.00231538	-0.418108
ENSG00000099974	DDTL	ENSG00000099974.7	0.00684555	0.0442648	0.270614	0.00112765	0.00236325	-1.06745
ENSG00000119684	MLH3	ENSG00000119684.11	0.00443154	0.044415	0.271204	0.000550717	0.00181117	-1.71754
ENSG00000146243	IRAK1BP1	ENSG00000146243.9	0.00283956	0.0444563	0.271226	0.000553916	0.00196845	-1.82932
ENSG00000196642	RABL6	ENSG00000196642.11	0.0115131	0.0447249	0.272367	0.00456932	0.00664655	-0.540627
ENSG00000182670	TTC3	ENSG00000182670.9	0.00363304	0.0451757	0.274517	0.000312023	0.000603135	-0.950829
ENSG00000162576	MXRA8	ENSG00000162576.12	0.0175874	0.0453247	0.274759	0.00921922	0.0141333	-0.616384
ENSG00000133393	FOPNL	ENSG00000133393.8	0.00341367	0.0456574	0.276111	0.000799625	0.00144747	-0.856139
ENSG00000180776	ZDHHC20	ENSG00000180776.11	0.00664209	0.0461864	0.278474	0.0019475	0.00429002	-1.13936
ENSG00000117036	ETV3	ENSG00000117036.7	0.00244623	0.0463558	0.278827	0.000618597	0.00188837	-1.61007
ENSG00000128944	KNSTRN	ENSG00000128944.9	0.00233215	0.0464859	0.279189	0.00321678	0.00453139	-0.494336
ENSG00000137700	SLC37A4	ENSG00000137700.12	0.00175404	0.0465268	0.279189	0.00307813	0.00776468	-1.33487
ENSG00000099977	DDT	ENSG00000099977.9	0.00728667	0.0467123	0.279635	0.00096081	0.00198655	-1.04794
ENSG00000170881	RNF139	ENSG00000170881.4	0.00410465	0.0469124	0.27993	0.001645	0.00271074	-0.720602
ENSG00000100796	PPP4R3A	ENSG00000100796.13	0.00165852	0.0469638	0.27993	0.00102786	0.00174704	-0.765273
ENSG00000244462	RBM12	ENSG00000244462.3	0.00240358	0.0470655	0.27993	0.00192203	0.00264401	-0.460092
ENSG00000004399	PLXND1	ENSG00000004399.8	0.004263	0.0470675	0.27993	0.00177751	0.00292541	-0.718782
ENSG00000143458	GABPB2	ENSG00000143458.7	0.00204156	0.0471981	0.280115	0.000588285	0.0014569	-1.30832
ENSG00000133872	SARAF	ENSG00000133872.9	0.00167693	0.0472097	0.280115	0.00334458	0.0049012	-0.55131
ENSG00000059145	UNKL	ENSG00000059145.14	0.0167488	0.0473709	0.280467	0.0452391	0.0669013	-0.564465
ENSG00000104231	ZFAND1	ENSG00000104231.6	0.00345046	0.0474176	0.280467	0.000484985	0.000893562	-0.881627
ENSG00000169371	SNUPN	ENSG00000169371.9	0.00237426	0.0479211	0.282174	0.000893429	0.00273287	-1.61299
ENSG00000100151	PICK1	ENSG00000100151.11	0.0079692	0.0483105	0.283638	0.00119394	0.00320882	-1.42631
ENSG00000043143	JADE2	ENSG00000043143.16	0.00508217	0.0484122	0.284069	0.00120988	0.00215923	-0.835652
ENSG00000050165	DKK3	ENSG00000050165.13	0.00176842	0.0485782	0.284546	0.00496909	0.00792363	-0.67318
ENSG00000100997	ABHD12	ENSG00000100997.14	0.00237404	0.0486601	0.28486	0.00304643	0.00468028	-0.619479
ENSG00000146143	PRIM2	ENSG00000146143.13	0.00297611	0.0487195	0.285042	0.00217515	0.00322436	-0.567896
ENSG00000198218	QRICH1	ENSG00000198218.6	0.00131667	0.0488317	0.285201	0.00196408	0.00308627	-0.652012
ENSG00000151846	PABPC3	ENSG00000151846.7	0.00561665	0.0489036	0.285455	0.000509108	0.00131146	-1.36513
ENSG00000115295	CLIP4	ENSG00000115295.15	0.00286134	0.0490068	0.285761	0.000904296	0.00213553	-1.23973
ENSG00000117151	CTBS	ENSG00000117151.8	0.00445277	0.0491811	0.286245	0.0027754	0.00440654	-0.666952
ENSG00000136717	BIN1	ENSG00000136717.10	0.00797095	0.0493079	0.286818	0.00248448	0.00377759	-0.604522
ENSG00000121749	TBC1D15	ENSG00000121749.11	0.00318546	0.0494203	0.28714	0.00208538	0.00343082	-0.718242
ENSG00000157212	PAXIP1	ENSG00000157212.14	0.00184718	0.049686	0.288018	0.0011989	0.00315976	-1.39811
ENSG00000148082	SHC3	ENSG00000148082.5	0.00529739	0.0497822	0.288244	0.0745069	0.169333	-1.18442
ENSG00000152558	TMEM123	ENSG00000152558.10	0.00347599	0.0498908	0.288541	0.00202262	0.00277509	-0.456307
ENSG00000198648	STK39	ENSG00000198648.6	0.00185475	0.0499517	0.288562	0.00109596	0.00198988	-0.860479
ENSG00000075539	FRYL	ENSG00000075539.9	0.0019283	0.0501033	0.28894	0.00111522	0.00149333	-0.421209
ENSG00000127337	YEATS4	ENSG00000127337.2	0.00210289	0.0501375	0.288972	0.00118232	0.00261278	-1.14397
ENSG00000159231	CBR3	ENSG00000159231.5	0.00682617	0.0502142	0.289188	0.00222129	0.00803551	-1.85499
ENSG00000186260	MKL2	ENSG00000186260.12	0.00323954	0.0502325	0.289188	0.00116083	0.00247077	-1.0898
ENSG00000167969	ECI1	ENSG00000167969.8	0.00719716	0.0503785	0.289509	0.00424422	0.00739893	-0.801819
ENSG00000205629	LCMT1	ENSG00000205629.7	0.00155151	0.0504032	0.289509	0.00150831	0.00339591	-1.17086
ENSG00000021574	SPAST	ENSG00000021574.7	0.00500427	0.050742	0.290544	0.00113628	0.00216321	-0.928856
ENSG00000010404	IDS	ENSG00000010404.13	0.00174843	0.0511168	0.292109	0.000701084	0.00175524	-1.32401
ENSG00000173085	COQ2	ENSG00000173085.9	0.00288691	0.0513642	0.292628	0.00497616	0.00749313	-0.590535
ENSG00000164609	SLU7	ENSG00000164609.5	0.00235585	0.051389	0.292628	0.000861382	0.00168215	-0.965584
ENSG00000261221	ZNF865	ENSG00000261221.1	0.0164105	0.051418	0.292628	0.00246617	0.00730292	-1.5662
ENSG00000253710	ALG11	ENSG00000253710.1	0.00281126	0.0517519	0.293241	0.00361985	0.00580765	-0.682023
ENSG00000177706	FAM20C	ENSG00000177706.8	0.00780762	0.0519563	0.293738	0.00623388	0.0100402	-0.687579
ENSG00000233822	HIST1H2BN	ENSG00000233822.3	0.00658425	0.0520349	0.293771	0.00148593	0.0021312	-0.520301
ENSG00000152749	GPR180	ENSG00000152749.7	0.00517448	0.0520616	0.293771	0.00103234	0.00236902	-1.19838
ENSG00000164442	CITED2	ENSG00000164442.8	0.00186578	0.0520788	0.293771	0.00362744	0.00513143	-0.50041
ENSG00000104805	NUCB1	ENSG00000104805.11	0.00576103	0.0522486	0.293948	0.00535082	0.00745366	-0.478189
ENSG00000114030	KPNA1	ENSG00000114030.8	0.00249456	0.0522561	0.293948	0.0016309	0.00222497	-0.448119
ENSG00000144455	SUMF1	ENSG00000144455.9	0.00300171	0.0523043	0.294053	0.00455604	0.00773613	-0.763831
ENSG00000140525	FANCI	ENSG00000140525.13	0.00200418	0.0524685	0.294204	0.00238325	0.0031621	-0.407952
ENSG00000170322	NFRKB	ENSG00000170322.10	0.0023884	0.0527574	0.295447	0.00111806	0.00235667	-1.07575
ENSG00000151612	ZNF827	ENSG00000151612.11	0.00259686	0.0528067	0.295559	0.000702235	0.00159952	-1.18761
ENSG00000170242	USP47	ENSG00000170242.13	0.00294643	0.0528593	0.295629	0.00091627	0.00129232	-0.496114
ENSG00000153815	CMIP	ENSG00000153815.12	0.00429383	0.0529269	0.295635	0.00347017	0.00556315	-0.680897
ENSG00000157933	SKI	ENSG00000157933.9	0.00940804	0.0530852	0.295802	0.000796146	0.00163508	-1.03826
ENSG00000100129	EIF3L	ENSG00000100129.13	0.0019275	0.0532753	0.296369	0.00166195	0.00239048	-0.524419
ENSG00000149262	INTS4	ENSG00000149262.12	0.00262276	0.0535076	0.297005	0.000943119	0.00228082	-1.27404
ENSG00000172915	NBEA	ENSG00000172915.14	0.00361304	0.0535989	0.297021	0.00101786	0.00275049	-1.43415
ENSG00000137807	KIF23	ENSG00000137807.9	0.00283896	0.0538713	0.298203	0.00183028	0.00258121	-0.495985
ENSG00000197417	SHPK	ENSG00000197417.7	0.00248911	0.0540392	0.298811	0.000993422	0.00238528	-1.26368
ENSG00000196284	SUPT3H	ENSG00000196284.9	0.00268692	0.0540406	0.298811	0.0017157	0.00416409	-1.2792
ENSG00000170396	ZNF804A	ENSG00000170396.6	0.00604629	0.0541388	0.298995	0.00707995	0.012524	-0.822881
ENSG00000173209	AHSA2	ENSG00000173209.18	0.0018881	0.0541471	0.298995	0.000524284	0.000904075	-0.786093
ENSG00000143549	TPM3	ENSG00000143549.15	0.0011983	0.0542568	0.299185	0.000305161	0.000411128	-0.430016
ENSG00000116809	ZBTB17	ENSG00000116809.7	0.00661768	0.0543875	0.29925	0.0013838	0.00271516	-0.972399
ENSG00000044090	CUL7	ENSG00000044090.4	0.00271833	0.0544483	0.299386	0.00205013	0.00274472	-0.420944
ENSG00000185033	SEMA4B	ENSG00000185033.10	0.00240388	0.0545445	0.299386	0.00831941	0.0125571	-0.593948
ENSG00000134247	PTGFRN	ENSG00000134247.9	0.00130661	0.0546447	0.299683	0.00369327	0.00531543	-0.525287
ENSG00000164252	AGGF1	ENSG00000164252.8	0.00270549	0.0548223	0.300039	0.00114756	0.0018766	-0.709555
ENSG00000172992	DCAKD	ENSG00000172992.7	0.0022335	0.0555387	0.302422	0.00157276	0.00378987	-1.26885
ENSG00000166997	CNPY4	ENSG00000166997.3	0.00263569	0.0555646	0.302422	0.00360482	0.00853457	-1.24339
ENSG00000089693	MLF2	ENSG00000089693.6	0.00496321	0.055637	0.302532	0.00322348	0.00438584	-0.444235
ENSG00000136213	CHST12	ENSG00000136213.7	0.00656156	0.0556449	0.302532	0.00688693	0.0144676	-1.0709
ENSG00000178999	AURKB	ENSG00000178999.8	0.00235464	0.0557144	0.302746	0.00416015	0.00590812	-0.506063
ENSG00000101752	MIB1	ENSG00000101752.7	0.00263529	0.0559786	0.303854	0.000509237	0.000926244	-0.863055
ENSG00000172986	GXYLT2	ENSG00000172986.8	0.00236891	0.0562521	0.305011	0.000815878	0.00286516	-1.81219
ENSG00000138777	PPA2	ENSG00000138777.15	0.00302056	0.0562827	0.305011	0.00445889	0.00612477	-0.457972
ENSG00000151689	INPP1	ENSG00000151689.8	0.00170259	0.0563703	0.305082	0.00254465	0.00557787	-1.13225
ENSG00000143578	CREB3L4	ENSG00000143578.11	0.00288491	0.0564706	0.305208	0.00152354	0.00404643	-1.40922
ENSG00000142731	PLK4	ENSG00000142731.6	0.00426281	0.0565558	0.305341	0.000964164	0.00156179	-0.695851
ENSG00000108465	CDK5RAP3	ENSG00000108465.10	0.00113568	0.0570018	0.307052	0.00105427	0.002049	-0.958675
ENSG00000101236	RNF24	ENSG00000101236.12	0.00405945	0.0570426	0.307052	0.000719676	0.0019274	-1.42124
ENSG00000196535	MYO18A	ENSG00000196535.10	0.00398145	0.0570606	0.307052	0.00222183	0.00370257	-0.736779
ENSG00000137710	RDX	ENSG00000137710.10	0.00361366	0.0572011	0.307341	0.000651767	0.00113186	-0.796271
ENSG00000184363	PKP3	ENSG00000184363.5	0.0131255	0.0573028	0.307724	0.00153717	0.00391511	-1.34878
ENSG00000177426	TGIF1	ENSG00000177426.16	0.00375794	0.0574036	0.308101	0.00169262	0.00278617	-0.719021
ENSG00000198382	UVRAG	ENSG00000198382.4	0.00205335	0.0576251	0.30896	0.000893106	0.00233176	-1.38452
ENSG00000158411	MITD1	ENSG00000158411.6	0.00397889	0.0580737	0.310044	0.00129851	0.0033344	-1.36057
ENSG00000107819	SFXN3	ENSG00000107819.9	0.0019044	0.058454	0.31067	0.00181033	0.00346055	-0.934743
ENSG00000141480	ARRB2	ENSG00000141480.13	0.00287511	0.0590626	0.311688	0.00079531	0.00249748	-1.65088
ENSG00000177054	ZDHHC13	ENSG00000177054.9	0.00202282	0.0592529	0.312517	0.00159968	0.00328346	-1.03744
ENSG00000160058	BSDC1	ENSG00000160058.14	0.00266184	0.0597039	0.313921	0.00125541	0.00192836	-0.619218
ENSG00000143748	NVL	ENSG00000143748.13	0.00207233	0.0598186	0.314273	0.00106762	0.00204121	-0.935035
ENSG00000163166	IWS1	ENSG00000163166.9	0.00160654	0.05989	0.314273	0.00262873	0.00415866	-0.661753
ENSG00000150593	PDCD4	ENSG00000150593.11	0.0054871	0.0598956	0.314273	0.00377397	0.00587486	-0.638472
ENSG00000175105	ZNF654	ENSG00000175105.5	0.00508672	0.0599585	0.314363	0.000380711	0.00129377	-1.76481
ENSG00000121067	SPOP	ENSG00000121067.13	0.00107816	0.0599753	0.314363	0.0016749	0.00244252	-0.544296
ENSG00000132199	ENOSF1	ENSG00000132199.14	0.00530097	0.0601421	0.314759	0.007033	0.0102134	-0.538254
ENSG00000160293	VAV2	ENSG00000160293.12	0.00378776	0.0601585	0.314759	0.00120294	0.00231358	-0.943557
ENSG00000125257	ABCC4	ENSG00000125257.9	0.00252591	0.0602324	0.314759	0.00332462	0.00454828	-0.452132
ENSG00000113583	C5orf15	ENSG00000113583.6	0.00386508	0.0603008	0.314759	0.00315226	0.00472517	-0.583981
ENSG00000092470	WDR76	ENSG00000092470.7	0.00207205	0.0605032	0.315597	0.000687837	0.00132362	-0.944347
ENSG00000144791	LIMD1	ENSG00000144791.5	0.00110312	0.0605555	0.315597	0.000756491	0.00153656	-1.02231
ENSG00000095383	TBC1D2	ENSG00000095383.15	0.00443005	0.0609449	0.317094	0.00125019	0.00265727	-1.0878
ENSG00000134982	APC	ENSG00000134982.12	0.0035882	0.0610499	0.317094	0.000472776	0.000841361	-0.831567
ENSG00000131725	WDR44	ENSG00000131725.9	0.00273159	0.0612635	0.317374	0.00189931	0.00388696	-1.03317
ENSG00000184083	FAM120C	ENSG00000184083.7	0.00285722	0.0612655	0.317374	0.00124034	0.00271419	-1.12979
ENSG00000162517	PEF1	ENSG00000162517.8	0.00249578	0.0613148	0.317374	0.0012485	0.00212751	-0.768968
ENSG00000267855	NDUFA7	ENSG00000267855.1	0.00606295	0.0613378	0.317374	0.00587159	0.0094646	-0.68879
ENSG00000075399	VPS9D1	ENSG00000075399.8	0.0100469	0.0616022	0.317724	0.000440562	0.00206463	-2.22847
ENSG00000060971	ACAA1	ENSG00000060971.13	0.0057331	0.0616117	0.317724	0.00368053	0.00590946	-0.683112
ENSG00000100949	RABGGTA	ENSG00000100949.10	0.00360816	0.0617738	0.317724	0.00192997	0.00388913	-1.01087
ENSG00000117133	RPF1	ENSG00000117133.6	0.00252542	0.0618156	0.317724	0.00172185	0.00269936	-0.648659
ENSG00000102974	CTCF	ENSG00000102974.10	0.00160607	0.0619511	0.318258	0.00161832	0.00249994	-0.627398
ENSG00000101181	MTG2	ENSG00000101181.13	0.00432256	0.0620727	0.318558	0.00144206	0.00298252	-1.0484
ENSG00000168397	ATG4B	ENSG00000168397.12	0.00389549	0.0622192	0.319147	0.00252066	0.00382526	-0.601755
ENSG00000187954	CYHR1	ENSG00000187954.8	0.0095508	0.0622971	0.319372	0.00172838	0.00297564	-0.783775
ENSG00000107625	DDX50	ENSG00000107625.8	0.00378251	0.0624402	0.319792	0.00100611	0.00198344	-0.979213
ENSG00000111671	SPSB2	ENSG00000111671.5	0.0103687	0.0625358	0.320055	0.000768202	0.00286167	-1.8973
ENSG00000186866	POFUT2	ENSG00000186866.12	0.00217733	0.0627798	0.320715	0.00273225	0.00440276	-0.688318
ENSG00000228144	ENSG00000228144	ENSG00000228144.2	0.00223627	0.0630754	0.321304	0.0047856	0.00723997	-0.597283
ENSG00000111647	UHRF1BP1L	ENSG00000111647.8	0.00390108	0.0638146	0.323746	0.000873291	0.00162106	-0.892401
ENSG00000175104	TRAF6	ENSG00000175104.10	0.00314012	0.0638589	0.323746	0.00105599	0.00229252	-1.11833
ENSG00000138642	HERC6	ENSG00000138642.10	0.00202118	0.0639387	0.323746	0.000671321	0.00313201	-2.22201
ENSG00000022277	RTFDC1	ENSG00000022277.8	0.00124183	0.0639487	0.323746	0.00158639	0.0022733	-0.519041
ENSG00000137857	DUOX1	ENSG00000137857.13	0.00691645	0.0640482	0.323746	0.116781	0.192288	-0.719466
ENSG00000079739	PGM1	ENSG00000079739.11	0.00165714	0.064238	0.32448	0.00298908	0.00426951	-0.514368
ENSG00000101187	SLCO4A1	ENSG00000101187.11	0.0143959	0.0642969	0.324514	0.00376146	0.00647168	-0.782847
ENSG00000061794	MRPS35	ENSG00000061794.8	0.0015359	0.0645111	0.325269	0.00172681	0.00271768	-0.654263
ENSG00000170266	GLB1	ENSG00000170266.11	0.00158302	0.0646146	0.325307	0.00460445	0.00688598	-0.580635
ENSG00000196141	SPATS2L	ENSG00000196141.8	0.00147161	0.0646155	0.325307	0.00147249	0.00214843	-0.545025
ENSG00000102218	RP2	ENSG00000102218.5	0.00470216	0.0647074	0.325444	0.0046125	0.00620556	-0.428012
ENSG00000083535	PIBF1	ENSG00000083535.11	0.00385175	0.0650454	0.326432	0.000666171	0.00230641	-1.79168
ENSG00000114529	C3orf52	ENSG00000114529.8	0.00376479	0.065066	0.326432	0.000930923	0.00210177	-1.17487
ENSG00000079313	REXO1	ENSG00000079313.7	0.0106745	0.0652085	0.326977	0.00169503	0.00309303	-0.867709
ENSG00000073711	PPP2R3A	ENSG00000073711.6	0.00290418	0.0653192	0.327051	0.000594285	0.00125059	-1.07338
ENSG00000155111	CDK19	ENSG00000155111.10	0.00204601	0.0653657	0.327068	0.000898924	0.00203659	-1.17988
ENSG00000104218	CSPP1	ENSG00000104218.9	0.00282198	0.0654752	0.327181	0.00138717	0.00235607	-0.764239
ENSG00000138658	ZGRF1	ENSG00000138658.11	0.00292726	0.0656555	0.327629	0.000599418	0.00119647	-0.997148
ENSG00000100030	MAPK1	ENSG00000100030.10	0.00168355	0.0658815	0.328112	0.000940188	0.00131846	-0.48783
ENSG00000148677	ANKRD1	ENSG00000148677.6	0.00233955	0.0660175	0.328124	0.00181218	0.00271999	-0.585869
ENSG00000134571	MYBPC3	ENSG00000134571.6	0.0241797	0.0660224	0.328124	69.617	135.496	-0.960737
ENSG00000111271	ACAD10	ENSG00000111271.10	0.00274333	0.0661488	0.32859	0.00208563	0.00490927	-1.23503
ENSG00000163872	YEATS2	ENSG00000163872.11	0.00112814	0.0665277	0.329515	0.00103597	0.00151814	-0.551332
ENSG00000164542	KIAA0895	ENSG00000164542.8	0.00208054	0.0671634	0.33163	0.0025067	0.00448429	-0.839091
ENSG00000204954	C12orf73	ENSG00000204954.5	0.00227281	0.0679082	0.333917	0.00103098	0.00462963	-2.16688
ENSG00000104472	CHRAC1	ENSG00000104472.5	0.00152344	0.0679254	0.333917	0.0011511	0.00205028	-0.83281
ENSG00000076513	ANKRD13A	ENSG00000076513.12	0.00178359	0.0679674	0.333917	0.000714594	0.00111091	-0.636541
ENSG00000179335	CLK3	ENSG00000179335.14	0.00435831	0.0683328	0.333917	0.00204682	0.00344579	-0.751447
ENSG00000258366	RTEL1	ENSG00000258366.3	0.00794059	0.0683343	0.333917	0.00292933	0.00445804	-0.605836
ENSG00000158290	CUL4B	ENSG00000158290.12	0.00316316	0.0684879	0.333995	0.00172088	0.00261532	-0.603841
ENSG00000178927	C17orf62	ENSG00000178927.12	0.00640577	0.0684972	0.333995	0.00308471	0.0048883	-0.664198
ENSG00000004534	RBM6	ENSG00000004534.10	0.00121744	0.0689632	0.335177	0.000778832	0.00154344	-0.986761
ENSG00000164142	FAM160A1	ENSG00000164142.11	0.00461442	0.0689657	0.335177	0.00160866	0.00533493	-1.72961
ENSG00000090612	ZNF268	ENSG00000090612.16	0.00410089	0.0689695	0.335177	0.000285401	0.00105776	-1.88995
ENSG00000138175	ARL3	ENSG00000138175.8	0.00386854	0.0692799	0.335289	0.00315814	0.00784876	-1.31339
ENSG00000140534	TICRR	ENSG00000140534.9	0.0021702	0.0693403	0.335289	0.00150238	0.00306252	-1.02747
ENSG00000101333	PLCB4	ENSG00000101333.12	0.00305126	0.0697387	0.336625	0.000551685	0.0014763	-1.42007
ENSG00000187796	CARD9	ENSG00000187796.9	0.0112014	0.0699381	0.336941	0.00363288	0.00837077	-1.20425
ENSG00000144021	CIAO1	ENSG00000144021.2	0.00111275	0.0700805	0.337304	0.00173644	0.0024049	-0.469848
ENSG00000100600	LGMN	ENSG00000100600.10	0.00225738	0.0701949	0.337532	0.00576059	0.00796713	-0.467843
ENSG00000141349	G6PC3	ENSG00000141349.4	0.00566428	0.0703017	0.337547	0.00869278	0.0129584	-0.576003
ENSG00000184486	POU3F2	ENSG00000184486.7	0.00855689	0.0705391	0.337884	0.00403022	0.0107889	-1.42062
ENSG00000164989	CCDC171	ENSG00000164989.11	0.00328606	0.0706014	0.337884	0.0004466	0.00225326	-2.33496
ENSG00000189159	HN1	ENSG00000189159.11	0.00201917	0.0708859	0.339074	0.0035133	0.00472375	-0.427107
ENSG00000166164	BRD7	ENSG00000166164.11	0.00133882	0.0709489	0.339214	0.000319092	0.000594825	-0.898492
ENSG00000130340	SNX9	ENSG00000130340.10	0.00162155	0.071154	0.339672	0.00181932	0.00242653	-0.415497
ENSG00000136936	XPA	ENSG00000136936.6	0.00280856	0.0713808	0.339987	0.000695311	0.00282948	-2.02481
ENSG00000244486	SCARF2	ENSG00000244486.3	0.0264499	0.0717406	0.34088	0.00706071	0.0129066	-0.870222
ENSG00000169554	ZEB2	ENSG00000169554.12	0.00187416	0.0717764	0.34088	0.000671041	0.00115574	-0.78435
ENSG00000132405	TBC1D14	ENSG00000132405.14	0.00124589	0.0718052	0.34088	0.000742237	0.00107334	-0.53216
ENSG00000134744	ZCCHC11	ENSG00000134744.9	0.00213731	0.0718645	0.340918	0.00103567	0.00167017	-0.689426
ENSG00000173575	CHD2	ENSG00000173575.14	0.00132028	0.0720052	0.341183	0.000927153	0.00148634	-0.68088
ENSG00000184634	MED12	ENSG00000184634.11	0.00205733	0.0720919	0.341183	0.00226764	0.00384395	-0.761397
ENSG00000139350	NEDD1	ENSG00000139350.7	0.00583312	0.0721063	0.341183	0.00155161	0.00253688	-0.709292
ENSG00000213614	HEXA	ENSG00000213614.5	0.00164323	0.0722016	0.341183	0.00396042	0.00611478	-0.626645
ENSG00000087299	L2HGDH	ENSG00000087299.7	0.00211248	0.0727499	0.342554	0.00113269	0.00333436	-1.55765
ENSG00000088247	KHSRP	ENSG00000088247.11	0.00641733	0.0734591	0.344722	0.00242512	0.00324691	-0.421012
ENSG00000138750	NUP54	ENSG00000138750.10	0.00359466	0.0735189	0.344722	0.00181387	0.0025931	-0.515604
ENSG00000147650	LRP12	ENSG00000147650.7	0.00276161	0.0735507	0.344722	0.00262134	0.00376183	-0.521129
ENSG00000111786	SRSF9	ENSG00000111786.4	0.00196781	0.0735523	0.344722	0.00302605	0.00436813	-0.529582
ENSG00000134072	CAMK1	ENSG00000134072.6	0.00402217	0.0736313	0.344722	0.00248303	0.00496319	-0.999166
ENSG00000146281	PM20D2	ENSG00000146281.5	0.00323588	0.0740747	0.346267	0.00126982	0.00217115	-0.773839
ENSG00000101152	DNAJC5	ENSG00000101152.6	0.00354464	0.0742951	0.346975	0.000779602	0.00130722	-0.74569
ENSG00000172292	CERS6	ENSG00000172292.10	0.00329132	0.0744083	0.347251	0.00123786	0.00180823	-0.546725
ENSG00000086475	SEPHS1	ENSG00000086475.10	0.00163986	0.0746465	0.347809	0.000445307	0.00107968	-1.27773
ENSG00000138303	ASCC1	ENSG00000138303.13	0.00354113	0.0747621	0.348187	0.00188976	0.00326678	-0.789667
ENSG00000143776	CDC42BPA	ENSG00000143776.14	0.00173562	0.0750705	0.348816	0.00091481	0.00142532	-0.639747
ENSG00000119203	CPSF3	ENSG00000119203.9	0.00270458	0.0752099	0.349303	0.00195411	0.00274923	-0.492511
ENSG00000122068	FYTTD1	ENSG00000122068.8	0.00286705	0.0755084	0.349882	0.000688308	0.00108328	-0.654281
ENSG00000165512	ZNF22	ENSG00000165512.4	0.00197023	0.0757239	0.350558	0.00088657	0.00171762	-0.954107
ENSG00000164181	ELOVL7	ENSG00000164181.9	0.00302128	0.0759744	0.351395	0.00312708	0.00799506	-1.35429
ENSG00000172775	FAM192A	ENSG00000172775.12	0.00109909	0.0761888	0.351929	0.000888247	0.00153538	-0.789561
ENSG00000091009	RBM27	ENSG00000091009.6	0.00325868	0.076333	0.352244	0.000987965	0.00149914	-0.601608
ENSG00000115073	ACTR1B	ENSG00000115073.6	0.0054024	0.0766411	0.352819	0.00218121	0.00371555	-0.768447
ENSG00000085788	DDHD2	ENSG00000085788.9	0.00205792	0.0768635	0.353072	0.000624961	0.00121635	-0.960716
ENSG00000051382	PIK3CB	ENSG00000051382.4	0.00443587	0.0769935	0.353121	0.00200365	0.00328541	-0.713441
ENSG00000151498	ACAD8	ENSG00000151498.7	0.0016629	0.0772828	0.353837	0.000754335	0.00278243	-1.88307
ENSG00000131368	MRPS25	ENSG00000131368.3	0.00137705	0.0776425	0.354049	0.00116839	0.00203564	-0.800953
ENSG00000118596	SLC16A7	ENSG00000118596.7	0.00194536	0.0777464	0.354049	0.0031933	0.00431073	-0.432884
ENSG00000131269	ABCB7	ENSG00000131269.11	0.00232605	0.0779024	0.354131	0.00515036	0.00741312	-0.525408
ENSG00000196235	SUPT5H	ENSG00000196235.9	0.00312028	0.078002	0.354156	0.00199181	0.00266283	-0.418874
ENSG00000204370	SDHD	ENSG00000204370.4	0.00253357	0.0780862	0.354156	0.000285167	0.000894261	-1.64889
ENSG00000132005	RFX1	ENSG00000132005.4	0.00853635	0.0781191	0.354156	0.00592738	0.0124828	-1.07448
ENSG00000144580	CNOT9	ENSG00000144580.9	0.00167172	0.0781842	0.354292	0.00162567	0.00220834	-0.441932
ENSG00000182054	IDH2	ENSG00000182054.5	0.00370246	0.0783031	0.35437	0.00443922	0.00801291	-0.852019
ENSG00000159216	RUNX1	ENSG00000159216.14	0.00311976	0.0785778	0.354821	0.00148463	0.00219949	-0.567071
ENSG00000122591	FAM126A	ENSG00000122591.7	0.00180122	0.0787929	0.355291	0.000762354	0.00137196	-0.847701
ENSG00000104964	AES	ENSG00000104964.10	0.00662953	0.0792797	0.35626	0.00263258	0.00382527	-0.539086
ENSG00000089902	RCOR1	ENSG00000089902.8	0.00222843	0.0792835	0.35626	0.000853661	0.00158393	-0.891778
ENSG00000119383	PTPA	ENSG00000119383.15	0.00376527	0.0793427	0.35626	0.00228087	0.00332883	-0.545433
ENSG00000143797	MBOAT2	ENSG00000143797.7	0.00181004	0.0794704	0.356373	0.00172132	0.00239953	-0.479234
ENSG00000072518	MARK2	ENSG00000072518.16	0.0063483	0.0796162	0.35645	0.000682135	0.00191275	-1.48752
ENSG00000177302	TOP3A	ENSG00000177302.10	0.000992179	0.0797675	0.356494	0.00132306	0.00207086	-0.646353
ENSG00000137145	DENND4C	ENSG00000137145.16	0.00311318	0.0797886	0.356494	0.00109801	0.00201131	-0.873241
ENSG00000174599	TRAM1L1	ENSG00000174599.4	0.00291622	0.0797895	0.356494	0.00367938	0.00766703	-1.05921
ENSG00000127528	KLF2	ENSG00000127528.5	0.0217968	0.0798884	0.356595	0.0106594	0.0242201	-1.18408
ENSG00000136854	STXBP1	ENSG00000136854.13	0.00486903	0.0800609	0.356696	0.00400085	0.00609607	-0.607572
ENSG00000157036	EXOG	ENSG00000157036.8	0.00241964	0.0803677	0.35743	0.000960115	0.00258824	-1.43069
ENSG00000151239	TWF1	ENSG00000151239.9	0.00496728	0.0804895	0.357498	7.66576e-05	0.00025181	-1.71583
ENSG00000110172	CHORDC1	ENSG00000110172.7	0.00262914	0.0805526	0.357621	0.000384709	0.000767283	-0.995989
ENSG00000042088	TDP1	ENSG00000042088.9	0.00240987	0.0806282	0.357799	0.00169995	0.00259563	-0.610592
ENSG00000123178	SPRYD7	ENSG00000123178.10	0.00321536	0.0809626	0.358808	0.000962381	0.0027181	-1.49792
ENSG00000138802	SEC24B	ENSG00000138802.7	0.00388872	0.0812983	0.359935	0.00152894	0.00282895	-0.887738
ENSG00000136451	VEZF1	ENSG00000136451.4	0.00329523	0.0815606	0.360336	0.000720632	0.00113494	-0.655286
ENSG00000197535	MYO5A	ENSG00000197535.10	0.00121332	0.0816112	0.360336	0.000634101	0.00106062	-0.742123
ENSG00000143228	NUF2	ENSG00000143228.8	0.00338233	0.081765	0.360516	0.00398164	0.00535282	-0.426937
ENSG00000163528	CHCHD4	ENSG00000163528.8	0.00170006	0.0819339	0.360889	0.000947161	0.00204837	-1.1128
ENSG00000131876	SNRPA1	ENSG00000131876.12	0.00972084	0.0821262	0.361391	0.00167788	0.00370778	-1.14392
ENSG00000125753	VASP	ENSG00000125753.9	0.0117353	0.0822695	0.361682	0.00237692	0.00330168	-0.474105
ENSG00000112294	ALDH5A1	ENSG00000112294.8	0.00204215	0.082386	0.361871	0.00233902	0.0057561	-1.29918
ENSG00000081853	PCDHGA2	ENSG00000081853.13	0.00203181	0.0826483	0.361871	0.0013927	0.00226387	-0.70091
ENSG00000141562	NARF	ENSG00000141562.13	0.00229997	0.0827737	0.362054	0.00242385	0.00339035	-0.484131
ENSG00000087008	ACOX3	ENSG00000087008.11	0.00159392	0.0828984	0.362146	0.0025662	0.00475412	-0.889545
ENSG00000165185	KIAA1958	ENSG00000165185.10	0.00309149	0.0831245	0.362486	0.0012574	0.00318554	-1.34109
ENSG00000183283	DAZAP2	ENSG00000183283.11	0.00139481	0.0833844	0.362673	0.00146108	0.00211125	-0.531063
ENSG00000120948	TARDBP	ENSG00000120948.11	0.00256366	0.0834155	0.362673	0.000946165	0.00147122	-0.636846
ENSG00000198301	SDAD1	ENSG00000198301.7	0.00233807	0.0837241	0.363521	0.000870388	0.00128418	-0.56112
ENSG00000127980	PEX1	ENSG00000127980.11	0.00337447	0.0837348	0.363521	0.00104597	0.00217251	-1.05453
ENSG00000264058	ENSG00000264058	ENSG00000264058.1	0.00246038	0.083759	0.363521	0.000564617	0.00133344	-1.23981
ENSG00000108784	NAGLU	ENSG00000108784.5	0.00493957	0.0841322	0.36389	0.00514256	0.00920171	-0.839413
ENSG00000176108	CHMP6	ENSG00000176108.5	0.00769335	0.0841699	0.36389	0.0011557	0.00238865	-1.04743
ENSG00000151929	BAG3	ENSG00000151929.5	0.00508604	0.0841935	0.36389	0.00283311	0.00427841	-0.594691
ENSG00000135596	MICAL1	ENSG00000135596.13	0.00390268	0.0842543	0.36389	0.00161066	0.00290372	-0.850247
ENSG00000256222	MTRNR2L3	ENSG00000256222.1	0.0120959	0.0844222	0.36389	0.0249884	0.070102	-1.48819
ENSG00000167182	SP2	ENSG00000167182.11	0.00590474	0.0845428	0.364254	0.00243697	0.00450867	-0.887616
ENSG00000173548	SNX33	ENSG00000173548.8	0.00553312	0.0848936	0.364999	0.00161856	0.00348179	-1.10512
ENSG00000197323	TRIM33	ENSG00000197323.6	0.00325945	0.0849635	0.365129	0.000914371	0.00145082	-0.666021
ENSG00000149089	APIP	ENSG00000149089.8	0.00287714	0.0851354	0.365244	0.00112332	0.00262852	-1.22648
ENSG00000115459	ELMOD3	ENSG00000115459.13	0.00222106	0.0859549	0.366729	0.00175999	0.00335636	-0.931332
ENSG00000137337	MDC1	ENSG00000137337.10	0.00258521	0.0861487	0.367245	0.00172407	0.00239578	-0.474674
ENSG00000167925	GHDC	ENSG00000167925.11	0.00728572	0.0863045	0.367442	0.0015786	0.00477677	-1.59739
ENSG00000148158	SNX30	ENSG00000148158.12	0.00130972	0.0869324	0.368487	0.000526767	0.00113378	-1.10591
ENSG00000122557	HERPUD2	ENSG00000122557.5	0.00301813	0.0869655	0.368487	0.00317157	0.00454918	-0.520408
ENSG00000125398	SOX9	ENSG00000125398.5	0.00287044	0.0869968	0.368487	0.00285991	0.0046718	-0.70801
ENSG00000164117	FBXO8	ENSG00000164117.8	0.00182979	0.0869992	0.368487	0.00115217	0.00232286	-1.01155
ENSG00000183696	UPP1	ENSG00000183696.9	0.00429602	0.0871152	0.368487	0.00121788	0.00261885	-1.10456
ENSG00000122741	DCAF10	ENSG00000122741.11	0.00222997	0.0871408	0.368487	0.000455334	0.0010323	-1.18087
ENSG00000262304	ENSG00000262304	ENSG00000262304.1	0.00178057	0.0873456	0.369065	0.00116778	0.00246805	-1.0796
ENSG00000184056	VPS33B	ENSG00000184056.10	0.00404905	0.0879647	0.37066	0.00349345	0.0063607	-0.864531
ENSG00000075975	MKRN2	ENSG00000075975.11	0.00105127	0.0880653	0.37066	0.00115067	0.00210158	-0.868998
ENSG00000099203	TMED1	ENSG00000099203.2	0.00547198	0.0880811	0.37066	0.0059659	0.00884455	-0.568049
ENSG00000065457	ADAT1	ENSG00000065457.6	0.00115457	0.0884312	0.370993	0.000711335	0.00136689	-0.942292
ENSG00000167779	IGFBP6	ENSG00000167779.3	0.0197967	0.0885209	0.370993	0.0135912	0.0223853	-0.719879
ENSG00000164898	FMC1	ENSG00000164898.8	0.0062982	0.0885495	0.370993	0.00782479	0.0128092	-0.711062
ENSG00000066136	NFYC	ENSG00000066136.15	0.00256879	0.0887588	0.371143	0.00230402	0.00385698	-0.743319
ENSG00000166507	NDST2	ENSG00000166507.12	0.00678894	0.0888421	0.371337	0.00134914	0.00382013	-1.50158
ENSG00000099385	BCL7C	ENSG00000099385.7	0.00883738	0.0889125	0.371475	0.00250158	0.00354151	-0.501523
ENSG00000156103	MMP16	ENSG00000156103.11	0.00334825	0.0889489	0.371475	0.00120882	0.00176945	-0.549709
ENSG00000114054	PCCB	ENSG00000114054.9	0.00196893	0.0892918	0.372444	0.00303221	0.00443612	-0.548927
ENSG00000149639	SOGA1	ENSG00000149639.10	0.00768721	0.0893857	0.372681	0.00179895	0.00261507	-0.539697
ENSG00000134901	KDELC1	ENSG00000134901.8	0.00321973	0.0898271	0.373397	0.00620148	0.0094426	-0.60657
ENSG00000173889	PHC3	ENSG00000173889.11	0.00235276	0.0898913	0.373397	0.000633666	0.00121091	-0.934301
ENSG00000136522	MRPL47	ENSG00000136522.9	0.00250469	0.0900679	0.373655	0.00254757	0.0036265	-0.509457
ENSG00000099219	ERMP1	ENSG00000099219.9	0.00554437	0.0903921	0.373968	0.00314141	0.00544276	-0.792929
ENSG00000100325	ASCC2	ENSG00000100325.10	0.00192397	0.0904621	0.373968	0.00350345	0.00518132	-0.564546
ENSG00000154727	GABPA	ENSG00000154727.6	0.00355174	0.0904744	0.373968	0.000672356	0.00191386	-1.50919
ENSG00000136603	SKIL	ENSG00000136603.9	0.00302187	0.090634	0.374231	0.000827557	0.00118433	-0.517138
ENSG00000107438	PDLIM1	ENSG00000107438.4	0.00284638	0.0906833	0.374231	0.00342951	0.00595724	-0.796641
ENSG00000166451	CENPN	ENSG00000166451.9	0.00321956	0.0909526	0.375021	0.00215267	0.00306828	-0.511303
ENSG00000171202	TMEM126A	ENSG00000171202.2	0.00459506	0.0912973	0.375827	0.00346253	0.00556432	-0.684377
ENSG00000179604	CDC42EP4	ENSG00000179604.8	0.00794408	0.0913484	0.375884	0.00286461	0.00440091	-0.619462
ENSG00000151503	NCAPD3	ENSG00000151503.8	0.00139958	0.091897	0.376521	0.00173658	0.0025223	-0.538494
ENSG00000109083	IFT20	ENSG00000109083.9	0.00182613	0.0919434	0.376521	0.00108467	0.00242673	-1.16176
ENSG00000138496	PARP9	ENSG00000138496.12	0.0033406	0.0923345	0.376992	0.00191078	0.00366322	-0.938952
ENSG00000011454	RABGAP1	ENSG00000011454.12	0.00235482	0.0923346	0.376992	0.00195818	0.00324186	-0.727308
ENSG00000198108	CHSY3	ENSG00000198108.3	0.00517563	0.092354	0.376992	0.0026963	0.00548078	-1.0234
ENSG00000143093	STRIP1	ENSG00000143093.10	0.00229649	0.0927325	0.377673	0.00223279	0.00332563	-0.574776
ENSG00000135245	HILPDA	ENSG00000135245.9	0.00347105	0.0927585	0.377673	0.00253965	0.0043184	-0.76587
ENSG00000048649	RSF1	ENSG00000048649.9	0.00337407	0.0930387	0.378508	0.00178415	0.00237958	-0.415471
ENSG00000096872	IFT74	ENSG00000096872.11	0.00267427	0.0934546	0.379381	0.00198	0.00309561	-0.644721
ENSG00000135778	NTPCR	ENSG00000135778.7	0.00149359	0.0934826	0.379381	0.00208232	0.00364411	-0.807372
ENSG00000136643	RPS6KC1	ENSG00000136643.7	0.00315454	0.0938425	0.379427	0.000692297	0.00158618	-1.1961
ENSG00000006634	DBF4	ENSG00000006634.3	0.00509294	0.0938601	0.379427	0.000825539	0.00208635	-1.33757
ENSG00000126216	TUBGCP3	ENSG00000126216.8	0.00382877	0.09393	0.379427	0.00154611	0.00289949	-0.907152
ENSG00000085449	WDFY1	ENSG00000085449.10	0.00313449	0.0939842	0.379427	0.00121831	0.00191932	-0.655713
ENSG00000131067	GGT7	ENSG00000131067.12	0.00270096	0.0940937	0.379427	0.00245338	0.00889568	-1.85833
ENSG00000104765	BNIP3L	ENSG00000104765.10	0.00192634	0.0944739	0.380199	0.00189525	0.00306623	-0.694079
ENSG00000103254	FAM173A	ENSG00000103254.5	0.0310595	0.0947176	0.380571	0.00414168	0.00874071	-1.07753
ENSG00000167995	BEST1	ENSG00000167995.11	0.00484142	0.0949725	0.381196	6.81929e-05	0.000193468	-1.5044
ENSG00000105701	FKBP8	ENSG00000105701.11	0.0153054	0.0953097	0.38158	0.00210147	0.00370404	-0.8177
ENSG00000175573	C11orf68	ENSG00000175573.6	0.00808508	0.0955656	0.381997	0.00242958	0.00372165	-0.615235
ENSG00000150779	TIMM8B	ENSG00000150779.7	0.0039018	0.0956714	0.382116	0.00183613	0.00304573	-0.730121
ENSG00000177189	RPS6KA3	ENSG00000177189.8	0.00224576	0.0958772	0.38233	0.00111528	0.00169699	-0.605574
ENSG00000160563	MED27	ENSG00000160563.9	0.00219277	0.0959148	0.38233	0.000918614	0.00213951	-1.21975
ENSG00000136754	ABI1	ENSG00000136754.12	0.00229724	0.0964941	0.383732	0.00126546	0.00199661	-0.65789
ENSG00000105379	ETFB	ENSG00000105379.5	0.00530231	0.0966438	0.38402	0.00726662	0.00959013	-0.400266
ENSG00000106077	ABHD11	ENSG00000106077.14	0.00630692	0.0967002	0.384092	0.00354999	0.00701479	-0.982586
ENSG00000127080	IPPK	ENSG00000127080.5	0.00166329	0.0970188	0.384599	0.000825721	0.00182864	-1.14705
ENSG00000149577	SIDT2	ENSG00000149577.11	0.00616884	0.0975832	0.385471	0.00387372	0.00717219	-0.888695
ENSG00000136937	NCBP1	ENSG00000136937.8	0.00197529	0.0976454	0.385565	0.00166908	0.0023813	-0.512693
ENSG00000139323	POC1B	ENSG00000139323.9	0.00255559	0.0983214	0.387518	0.000771453	0.00196928	-1.35201
ENSG00000113328	CCNG1	ENSG00000113328.14	0.00591326	0.0983582	0.387518	0.00160766	0.00241744	-0.588516
ENSG00000169375	SIN3A	ENSG00000169375.11	0.00192909	0.099287	0.390121	0.00214539	0.00310465	-0.533192
ENSG00000086589	RBM22	ENSG00000086589.7	0.00101848	0.0993106	0.390121	0.00148584	0.00206444	-0.474469
ENSG00000154845	PPP4R1	ENSG00000154845.11	0.00156432	0.0997195	0.391148	0.00119276	0.00170418	-0.51478
ENSG00000140451	PIF1	ENSG00000140451.8	0.00550258	0.0997679	0.391185	0.00208631	0.00558713	-1.42115
ENSG00000115904	SOS1	ENSG00000115904.8	0.00245274	0.0998249	0.391199	0.000962337	0.00157798	-0.713468
ENSG00000126456	IRF3	ENSG00000126456.11	0.00654635	0.100196	0.391706	0.00262948	0.00425785	-0.695347
ENSG00000179588	ZFPM1	ENSG00000179588.4	0.015687	0.100267	0.391706	0.00346436	0.0089281	-1.36577
ENSG00000047249	ATP6V1H	ENSG00000047249.12	0.00101665	0.100368	0.391706	0.00400088	0.00543268	-0.441347
ENSG00000204220	PFDN6	ENSG00000204220.5	0.00375066	0.100688	0.392348	0.00331377	0.00510353	-0.623023
ENSG00000149346	SLX4IP	ENSG00000149346.10	0.00301398	0.10088	0.392548	0.00115701	0.00462476	-1.99898
ENSG00000169738	DCXR	ENSG00000169738.3	0.00519982	0.100884	0.392548	0.00321319	0.00515941	-0.683199
ENSG00000100504	PYGL	ENSG00000100504.12	0.00193508	0.101131	0.39316	0.00189008	0.00306386	-0.696899
ENSG00000228716	DHFR	ENSG00000228716.2	0.00240131	0.101601	0.394378	0.000334888	0.00085379	-1.3502
ENSG00000107331	ABCA2	ENSG00000107331.12	0.0116249	0.101782	0.394777	0.00261172	0.00845646	-1.69506
ENSG00000184402	SS18L1	ENSG00000184402.10	0.00319975	0.101976	0.39517	0.0050266	0.0082246	-0.710364
ENSG00000204856	FAM216A	ENSG00000204856.7	0.00157248	0.102222	0.395624	0.00120963	0.00229226	-0.922207
ENSG00000001631	KRIT1	ENSG00000001631.10	0.0052403	0.102549	0.396156	0.00132062	0.00197533	-0.580881
ENSG00000145780	FEM1C	ENSG00000145780.6	0.00322487	0.10318	0.397224	0.00137164	0.00199776	-0.542478
ENSG00000144677	CTDSPL	ENSG00000144677.10	0.0040055	0.103301	0.397302	0.00110282	0.00243912	-1.14517
ENSG00000188603	CLN3	ENSG00000188603.12	0.00416935	0.103562	0.398156	0.0058703	0.00848505	-0.53149
ENSG00000106665	CLIP2	ENSG00000106665.11	0.0118498	0.103705	0.39819	0.00175856	0.00340878	-0.954859
ENSG00000153015	CWC27	ENSG00000153015.11	0.00289088	0.103912	0.39819	0.00190936	0.00284922	-0.577478
ENSG00000130684	ZNF337	ENSG00000130684.9	0.00206771	0.103941	0.39819	0.00105674	0.00204883	-0.955177
ENSG00000155957	TMBIM4	ENSG00000155957.12	0.00281885	0.104093	0.39819	0.00464743	0.00633668	-0.447293
ENSG00000163596	ICA1L	ENSG00000163596.12	0.00559344	0.104281	0.39819	0.00365127	0.00916399	-1.32758
ENSG00000186193	SAPCD2	ENSG00000186193.7	0.00904818	0.1044	0.39819	0.000747646	0.00142089	-0.926365
ENSG00000088256	GNA11	ENSG00000088256.4	0.00564777	0.104508	0.39819	0.00100263	0.00160884	-0.682237
ENSG00000138604	GLCE	ENSG00000138604.5	0.00314506	0.1048	0.399028	0.00153025	0.00246234	-0.686264
ENSG00000253797	UTP14C	ENSG00000253797.2	0.0016591	0.104922	0.399118	0.00112896	0.00188197	-0.737253
ENSG00000082068	WDR70	ENSG00000082068.4	0.00124189	0.105004	0.399278	0.00172893	0.00270707	-0.646857
ENSG00000102786	INTS6	ENSG00000102786.10	0.00226998	0.105638	0.400779	0.00085334	0.00152814	-0.840587
ENSG00000175662	TOM1L2	ENSG00000175662.13	0.00362818	0.105773	0.400953	0.00185025	0.00335083	-0.856798
ENSG00000171467	ZNF318	ENSG00000171467.11	0.00155191	0.105803	0.400953	0.000977329	0.00162232	-0.731146
ENSG00000121879	PIK3CA	ENSG00000121879.3	0.00410332	0.105924	0.401144	0.000671133	0.00126059	-0.909431
ENSG00000121716	PILRB	ENSG00000121716.14	0.00288632	0.106064	0.401337	0.000537815	0.00141851	-1.3992
ENSG00000072062	PRKACA	ENSG00000072062.9	0.00331037	0.106385	0.401576	0.00491772	0.00668354	-0.442624
ENSG00000253731	PCDHGA6	ENSG00000253731.1	0.00206797	0.106474	0.401576	0.00141958	0.00225149	-0.665415
ENSG00000157800	SLC37A3	ENSG00000157800.13	0.00127436	0.106477	0.401576	0.00201933	0.00355887	-0.817544
ENSG00000004864	SLC25A13	ENSG00000004864.9	0.00277697	0.106505	0.401576	0.00146388	0.00240248	-0.714731
ENSG00000237172	B3GNT9	ENSG00000237172.3	0.00567519	0.106734	0.401757	0.00161675	0.00243145	-0.58872
ENSG00000181826	RELL1	ENSG00000181826.5	0.00263526	0.106821	0.401934	0.0041248	0.00629457	-0.609786
ENSG00000160785	SLC25A44	ENSG00000160785.9	0.00188629	0.107242	0.402587	0.000651915	0.00152765	-1.22856
ENSG00000156162	DPY19L4	ENSG00000156162.12	0.00492057	0.107329	0.402587	0.00151701	0.00230487	-0.603454
ENSG00000088812	ATRN	ENSG00000088812.13	0.00112255	0.107363	0.402587	0.00327276	0.00434903	-0.410183
ENSG00000086848	ALG9	ENSG00000086848.10	0.00210938	0.107614	0.402814	0.00360076	0.00538263	-0.580009
ENSG00000187066	TMEM262	ENSG00000187066.4	0.00212533	0.108164	0.404082	0.00203166	0.00381713	-0.909832
ENSG00000101972	STAG2	ENSG00000101972.14	0.00327182	0.108854	0.405177	0.00178308	0.00244187	-0.45361
ENSG00000121775	TMEM39B	ENSG00000121775.13	0.00148424	0.108896	0.405177	0.00668403	0.00992075	-0.569732
ENSG00000163510	CWC22	ENSG00000163510.9	0.00428385	0.109275	0.405602	0.00144556	0.00244528	-0.75837
ENSG00000100519	PSMC6	ENSG00000100519.7	0.00257241	0.109387	0.405602	0.00078557	0.00145726	-0.89145
ENSG00000175390	EIF3F	ENSG00000175390.8	0.00144109	0.109447	0.405602	0.00133096	0.00203813	-0.614777
ENSG00000144366	GULP1	ENSG00000144366.11	0.00232927	0.109669	0.406125	0.000688724	0.00220348	-1.67779
ENSG00000214265	ENSG00000214265	ENSG00000214265.7	0.00336625	0.109899	0.406232	0.00550749	0.0581494	-3.4003
ENSG00000108349	CASC3	ENSG00000108349.10	0.00121665	0.110134	0.406639	0.00119606	0.0018148	-0.601516
ENSG00000075945	KIFAP3	ENSG00000075945.8	0.00395122	0.110227	0.406639	0.00202419	0.00294717	-0.541984
ENSG00000204564	C6orf136	ENSG00000204564.7	0.00202077	0.110402	0.406895	0.00503848	0.00979987	-0.959775
ENSG00000128578	STRIP2	ENSG00000128578.5	0.0020867	0.110608	0.407295	0.000873786	0.00179766	-1.04077
ENSG00000197019	SERTAD1	ENSG00000197019.4	0.00782021	0.110632	0.407295	0.00122323	0.00215949	-0.819993
ENSG00000213066	FGFR1OP	ENSG00000213066.7	0.00214126	0.110907	0.4081	0.00226419	0.00363967	-0.684816
ENSG00000185127	C6orf120	ENSG00000185127.5	0.00176726	0.111141	0.408274	0.00165266	0.00261613	-0.662646
ENSG00000105676	ARMC6	ENSG00000105676.9	0.0046828	0.11134	0.408706	0.00297766	0.00436533	-0.551913
ENSG00000081019	RSBN1	ENSG00000081019.9	0.00512211	0.111514	0.409195	0.000710124	0.00198833	-1.48542
ENSG00000156853	ZNF689	ENSG00000156853.7	0.00280367	0.112312	0.410081	0.000463023	0.00130284	-1.4925
ENSG00000196290	NIF3L1	ENSG00000196290.10	0.00228225	0.112503	0.410081	0.00268044	0.00477114	-0.831867
ENSG00000125968	ID1	ENSG00000125968.7	0.0136062	0.112674	0.410081	0.00451305	0.00618966	-0.455758
ENSG00000121481	RNF2	ENSG00000121481.6	0.00173784	0.112676	0.410081	0.00134443	0.00258494	-0.943134
ENSG00000108061	SHOC2	ENSG00000108061.7	0.00390554	0.112901	0.410672	0.000880165	0.00170374	-0.95286
ENSG00000174106	LEMD3	ENSG00000174106.2	0.00105659	0.112936	0.410672	0.00220324	0.00294951	-0.42085
ENSG00000160695	VPS11	ENSG00000160695.10	0.0015202	0.113202	0.411045	0.00191559	0.00340183	-0.828523
ENSG00000137166	FOXP4	ENSG00000137166.10	0.0113247	0.114438	0.413594	0.00267685	0.00423714	-0.662553
ENSG00000176720	BOK	ENSG00000176720.3	0.00993624	0.11465	0.413626	0.00107877	0.00284815	-1.40064
ENSG00000104205	SGK3	ENSG00000104205.8	0.00472412	0.115219	0.414782	0.000429953	0.0011634	-1.4361
ENSG00000103326	CAPN15	ENSG00000103326.6	0.0157753	0.115309	0.414832	0.000687515	0.001195	-0.797549
ENSG00000130311	DDA1	ENSG00000130311.6	0.00772873	0.115438	0.414832	0.0017934	0.00344879	-0.943393
ENSG00000204186	ZDBF2	ENSG00000204186.3	0.00243229	0.115456	0.414832	0.000377736	0.000917497	-1.28032
ENSG00000097046	CDC7	ENSG00000097046.8	0.00242663	0.115481	0.414832	0.00106032	0.00162193	-0.613214
ENSG00000240720	LRRD1	ENSG00000240720.3	0.00231158	0.11553	0.41486	0.00119446	0.00178508	-0.579627
ENSG00000185800	DMWD	ENSG00000185800.7	0.00596315	0.115658	0.415026	0.000667758	0.00138014	-1.04742
ENSG00000271092	TMEM56-RWDD3	ENSG00000271092.1	0.00213946	0.115711	0.415069	0.00191505	0.00423841	-1.14615
ENSG00000004975	DVL2	ENSG00000004975.7	0.00595094	0.115789	0.415134	0.00243728	0.00352238	-0.531276
ENSG00000174903	RAB1B	ENSG00000174903.10	0.00959148	0.115934	0.415134	0.00257568	0.00386391	-0.585109
ENSG00000102531	FNDC3A	ENSG00000102531.12	0.00257254	0.116323	0.416224	0.00115291	0.001589	-0.462846
ENSG00000113593	PPWD1	ENSG00000113593.7	0.00330066	0.116387	0.416306	0.00117995	0.00201057	-0.768872
ENSG00000166734	CASC4	ENSG00000166734.14	0.00570695	0.116505	0.416582	0.00115614	0.00205007	-0.826352
ENSG00000115902	SLC1A4	ENSG00000115902.6	0.00273337	0.117224	0.417964	0.00548958	0.00764169	-0.477197
ENSG00000157107	FCHO2	ENSG00000157107.9	0.00361958	0.117734	0.419335	0.00211626	0.00365653	-0.788956
ENSG00000130723	PRRC2B	ENSG00000130723.13	0.00427453	0.118559	0.420923	0.000964268	0.00136041	-0.496535
ENSG00000129810	SGO1	ENSG00000129810.10	0.00291723	0.118615	0.420923	0.00147077	0.00277873	-0.917858
ENSG00000171960	PPIH	ENSG00000171960.6	0.00381442	0.118765	0.420923	0.00162989	0.00293062	-0.846431
ENSG00000189298	ZKSCAN3	ENSG00000189298.9	0.00296482	0.119353	0.422496	0.00172773	0.00353511	-1.03287
ENSG00000214756	METTL12	ENSG00000214756.3	0.0155381	0.119437	0.422496	0.000656315	0.00267589	-2.02756
ENSG00000003756	RBM5	ENSG00000003756.12	0.00165575	0.119617	0.422496	0.0015208	0.00226446	-0.574337
ENSG00000146670	CDCA5	ENSG00000146670.5	0.00392291	0.11962	0.422496	0.0010537	0.00184237	-0.80609
ENSG00000114796	KLHL24	ENSG00000114796.11	0.00227316	0.119888	0.422911	0.00374385	0.00537256	-0.521087
ENSG00000166171	DPCD	ENSG00000166171.8	0.00307171	0.11992	0.422911	0.00143692	0.00329189	-1.19594
ENSG00000164172	MOCS2	ENSG00000164172.14	0.00158768	0.120034	0.42304	0.00182491	0.0024929	-0.449997
ENSG00000253485	PCDHGA5	ENSG00000253485.1	0.00234612	0.120134	0.423243	0.00127841	0.00200158	-0.646791
ENSG00000265817	FSBP	ENSG00000265817.1	0.00376407	0.120461	0.423315	0.000948455	0.00199682	-1.07405
ENSG00000182831	C16orf72	ENSG00000182831.7	0.00298975	0.120913	0.424023	0.00147455	0.00236232	-0.679934
ENSG00000100320	RBFOX2	ENSG00000100320.18	0.00125571	0.121031	0.42403	0.000876527	0.0012769	-0.542773
ENSG00000167785	ZNF558	ENSG00000167785.4	0.00258701	0.121122	0.424053	0.000652649	0.00176324	-1.43385
ENSG00000168040	FADD	ENSG00000168040.4	0.00216964	0.121521	0.425156	0.00270904	0.00447022	-0.722565
ENSG00000151116	UEVLD	ENSG00000151116.12	0.00257727	0.121784	0.425336	0.00087322	0.00171283	-0.971964
ENSG00000149308	NPAT	ENSG00000149308.12	0.00429457	0.122347	0.426637	0.00107855	0.00175513	-0.70248
ENSG00000166821	PEX11A	ENSG00000166821.4	0.00328146	0.122768	0.427017	0.00190093	0.00683682	-1.84662
ENSG00000262209	PCDHGB3	ENSG00000262209.1	0.00255804	0.122772	0.427017	0.00131091	0.00204668	-0.64271
ENSG00000126756	UXT	ENSG00000126756.7	0.00207097	0.122774	0.427017	0.00307958	0.00432098	-0.488625
ENSG00000137812	KNL1	ENSG00000137812.15	0.00392859	0.123341	0.428839	0.0012883	0.0017759	-0.463081
ENSG00000161091	MFSD12	ENSG00000161091.8	0.00782342	0.123459	0.42902	0.00267587	0.0036536	-0.449311
ENSG00000145041	DCAF1	ENSG00000145041.11	0.00179977	0.123705	0.42966	0.00233062	0.00336378	-0.529369
ENSG00000119471	HSDL2	ENSG00000119471.10	0.00264371	0.12417	0.430829	0.00256074	0.00344033	-0.425987
ENSG00000116641	DOCK7	ENSG00000116641.11	0.00327134	0.124867	0.431916	0.00132576	0.00202692	-0.612473
ENSG00000070269	TMEM260	ENSG00000070269.9	0.00247379	0.125054	0.432081	0.00130756	0.00387971	-1.56907
ENSG00000204956	PCDHGA1	ENSG00000204956.4	0.00219069	0.125243	0.432081	0.00144004	0.00217312	-0.593664
ENSG00000155508	CNOT8	ENSG00000155508.9	0.00262137	0.125247	0.432081	0.0024101	0.00342071	-0.505206
ENSG00000186566	GPATCH8	ENSG00000186566.7	0.00120528	0.125346	0.432081	0.00126277	0.00220425	-0.803692
ENSG00000127511	SIN3B	ENSG00000127511.5	0.00434536	0.125837	0.433179	0.00204657	0.00341935	-0.740517
ENSG00000038219	BOD1L1	ENSG00000038219.8	0.00139784	0.126372	0.434571	0.00129943	0.00191228	-0.55741
ENSG00000122778	KIAA1549	ENSG00000122778.5	0.00281737	0.126831	0.435413	0.00213648	0.00348766	-0.707023
ENSG00000167220	HDHD2	ENSG00000167220.7	0.00203139	0.127057	0.43549	0.00103834	0.00265544	-1.35467
ENSG00000051009	FAM160A2	ENSG00000051009.6	0.00322019	0.1277	0.436064	0.00160499	0.00288244	-0.844725
ENSG00000144579	CTDSP1	ENSG00000144579.3	0.00806256	0.127879	0.436064	0.00104386	0.00155865	-0.578371
ENSG00000157426	AASDH	ENSG00000157426.9	0.00607726	0.127902	0.436064	0.00097851	0.00231346	-1.24139
ENSG00000204498	NFKBIL1	ENSG00000204498.6	0.0114679	0.128577	0.437377	0.00170833	0.00299829	-0.811555
ENSG00000090013	BLVRB	ENSG00000090013.5	0.00663576	0.1288	0.437494	0.00917926	0.0141501	-0.624365
ENSG00000213585	VDAC1	ENSG00000213585.6	0.00235044	0.128972	0.437686	0.000370526	0.000538475	-0.539305
ENSG00000166135	HIF1AN	ENSG00000166135.9	0.00353154	0.129046	0.437791	0.000830672	0.00140167	-0.754794
ENSG00000024048	UBR2	ENSG00000024048.6	0.00249019	0.129149	0.437992	0.00150267	0.00229738	-0.612458
ENSG00000068912	ERLEC1	ENSG00000068912.9	0.00348403	0.129315	0.438136	0.00180504	0.00258265	-0.51682
ENSG00000166266	CUL5	ENSG00000166266.9	0.00380293	0.129541	0.438586	0.000818031	0.00144673	-0.822565
ENSG00000174738	NR1D2	ENSG00000174738.8	0.00263149	0.131508	0.443306	0.000681163	0.00103193	-0.599273
ENSG00000053747	LAMA3	ENSG00000053747.11	0.00279377	0.131902	0.444148	0.00733033	0.0157669	-1.10495
ENSG00000188811	NHLRC3	ENSG00000188811.8	0.00528196	0.132139	0.44469	0.00159067	0.00393322	-1.30608
ENSG00000196214	ZNF766	ENSG00000196214.6	0.00207591	0.13236	0.445052	0.000841078	0.00185186	-1.13866
ENSG00000001167	NFYA	ENSG00000001167.10	0.00333841	0.13238	0.445052	0.00241889	0.00338029	-0.482803
ENSG00000177946	CENPBD1	ENSG00000177946.4	0.00382522	0.132785	0.445969	0.000719099	0.00289163	-2.00762
ENSG00000169855	ROBO1	ENSG00000169855.15	0.0012124	0.13319	0.447032	0.00180512	0.00246266	-0.448121
ENSG00000189339	SLC35E2B	ENSG00000189339.7	0.00403962	0.133341	0.447389	0.000614376	0.00155393	-1.33872
ENSG00000119899	SLC17A5	ENSG00000119899.11	0.00375237	0.133389	0.4474	0.00449726	0.00697781	-0.633727
ENSG00000097007	ABL1	ENSG00000097007.13	0.00384832	0.133718	0.447795	0.0010494	0.00157269	-0.583672
ENSG00000175416	CLTB	ENSG00000175416.8	0.00666946	0.133846	0.447795	0.00112817	0.00197418	-0.80727
ENSG00000127946	HIP1	ENSG00000127946.12	0.00160983	0.133962	0.44798	0.000797545	0.00133527	-0.74349
ENSG00000213221	DNLZ	ENSG00000213221.4	0.0108575	0.134172	0.448384	0.00455499	0.00847823	-0.896315
ENSG00000059769	DNAJC25	ENSG00000059769.15	0.00407792	0.134507	0.448792	0.00115123	0.00174189	-0.597487
ENSG00000136802	LRRC8A	ENSG00000136802.7	0.00204977	0.134529	0.448792	0.00203226	0.00281671	-0.470925
ENSG00000167258	CDK12	ENSG00000167258.9	0.00118166	0.134641	0.448857	0.00089488	0.00128724	-0.524518
ENSG00000141002	TCF25	ENSG00000141002.14	0.00365841	0.13467	0.448857	0.00246649	0.00351096	-0.509404
ENSG00000072135	PTPN18	ENSG00000072135.8	0.00244199	0.134855	0.449101	0.000817018	0.00139349	-0.77026
ENSG00000240065	PSMB9	ENSG00000240065.3	0.00532039	0.134878	0.449101	0.00850261	0.0126058	-0.568116
ENSG00000129353	SLC44A2	ENSG00000129353.10	0.00140661	0.135013	0.449108	0.00560875	0.00841797	-0.585795
ENSG00000116791	CRYZ	ENSG00000116791.9	0.00244846	0.135738	0.451052	0.00290844	0.00388563	-0.417904
ENSG00000132376	INPP5K	ENSG00000132376.15	0.00397601	0.135816	0.451052	0.00150279	0.00297001	-0.982828
ENSG00000075218	GTSE1	ENSG00000075218.14	0.00362851	0.135906	0.451052	0.00308176	0.00430774	-0.483175
ENSG00000112130	RNF8	ENSG00000112130.12	0.00205329	0.13613	0.451087	0.000926587	0.00208987	-1.17341
ENSG00000178177	LCORL	ENSG00000178177.10	0.00447031	0.136207	0.451087	0.00112696	0.00165445	-0.553914
ENSG00000023041	ZDHHC6	ENSG00000023041.7	0.00259025	0.136508	0.451636	0.00343495	0.00535518	-0.640648
ENSG00000198830	HMGN2	ENSG00000198830.6	0.00281225	0.136679	0.45196	0.00409685	0.00544292	-0.409868
ENSG00000165502	RPL36AL	ENSG00000165502.6	0.00250915	0.137332	0.453524	0.000582461	0.000968588	-0.733722
ENSG00000150756	FAM173B	ENSG00000150756.9	0.00191095	0.137645	0.453528	0.000772738	0.00190559	-1.30218
ENSG00000147679	UTP23	ENSG00000147679.7	0.00386134	0.137662	0.453528	0.000908347	0.00126642	-0.47944
ENSG00000075089	ACTR6	ENSG00000075089.5	0.00304956	0.137923	0.453528	0.00158972	0.00327081	-1.04087
ENSG00000158747	NBL1	ENSG00000158747.9	0.0115526	0.138123	0.453528	0.0022497	0.00417778	-0.893
ENSG00000136826	KLF4	ENSG00000136826.10	0.00178619	0.138144	0.453528	0.00137375	0.00289253	-1.07421
ENSG00000170677	SOCS6	ENSG00000170677.5	0.00430438	0.138663	0.45458	0.000654148	0.000979613	-0.582594
ENSG00000142634	EFHD2	ENSG00000142634.8	0.00837116	0.139037	0.455126	0.00368696	0.00505463	-0.455175
ENSG00000100503	NIN	ENSG00000100503.19	0.00169661	0.139221	0.455328	0.000594788	0.000891652	-0.584107
ENSG00000167110	GOLGA2	ENSG00000167110.12	0.00237926	0.139294	0.455328	0.00132061	0.00199213	-0.593102
ENSG00000122641	INHBA	ENSG00000122641.9	0.00173744	0.139325	0.455328	0.00227508	0.00366345	-0.687288
ENSG00000133059	DSTYK	ENSG00000133059.12	0.00235324	0.139498	0.455743	0.00133214	0.00257268	-0.949529
ENSG00000153201	RANBP2	ENSG00000153201.11	0.00305183	0.140003	0.457097	0.000410248	0.000574618	-0.486106
ENSG00000123240	OPTN	ENSG00000123240.12	0.00144862	0.140388	0.458057	0.00285825	0.00394588	-0.465217
ENSG00000183527	PSMG1	ENSG00000183527.7	0.00112561	0.140709	0.458872	0.0027842	0.00374425	-0.427413
ENSG00000186448	ZNF197	ENSG00000186448.10	0.00493163	0.140834	0.458976	0.000346212	0.00121742	-1.8141
ENSG00000142453	CARM1	ENSG00000142453.7	0.00266942	0.141169	0.459133	0.00341317	0.00484007	-0.503917
ENSG00000254245	PCDHGA3	ENSG00000254245.1	0.00214747	0.141222	0.459142	0.00141456	0.00215836	-0.609582
ENSG00000198690	FAN1	ENSG00000198690.5	0.00401155	0.141555	0.460076	0.00081273	0.00154757	-0.92916
ENSG00000129226	CD68	ENSG00000129226.9	0.0025028	0.142916	0.463163	0.00521693	0.00714752	-0.454243
ENSG00000180509	KCNE1	ENSG00000180509.7	0.00603328	0.143029	0.463224	0.0729792	0.199247	-1.449
ENSG00000117676	RPS6KA1	ENSG00000117676.9	0.0024696	0.143185	0.463577	0.0021032	0.00336261	-0.676995
ENSG00000140326	CDAN1	ENSG00000140326.8	0.00490512	0.143404	0.46399	0.000911643	0.00218485	-1.26099
ENSG00000133243	BTBD2	ENSG00000133243.4	0.00865642	0.143521	0.464112	0.00245703	0.00389176	-0.663508
ENSG00000138231	DBR1	ENSG00000138231.8	0.00203596	0.144547	0.465446	0.00263152	0.00380597	-0.532365
ENSG00000149499	EML3	ENSG00000149499.7	0.00927332	0.144694	0.465758	0.00269687	0.00482841	-0.840265
ENSG00000159256	MORC3	ENSG00000159256.8	0.00449042	0.145465	0.467204	0.00112942	0.00209857	-0.893826
ENSG00000147874	HAUS6	ENSG00000147874.6	0.00327331	0.145588	0.467247	0.000365294	0.000667026	-0.868686
ENSG00000156531	PHF6	ENSG00000156531.12	0.00398807	0.145664	0.467247	0.000988027	0.00158259	-0.679667
ENSG00000034053	APBA2	ENSG00000034053.10	0.00466518	0.145736	0.46733	0.000927381	0.00185659	-1.00142
ENSG00000109736	MFSD10	ENSG00000109736.10	0.00930913	0.146	0.467877	0.00514328	0.00688334	-0.420421
ENSG00000136143	SUCLA2	ENSG00000136143.9	0.00132507	0.146233	0.468177	0.00166667	0.00250716	-0.589089
ENSG00000086504	MRPL28	ENSG00000086504.11	0.00550295	0.146624	0.468369	0.0031684	0.0045173	-0.511706
ENSG00000162222	TTC9C	ENSG00000162222.9	0.00393454	0.146845	0.468369	0.0021873	0.00344319	-0.654592
ENSG00000151413	NUBPL	ENSG00000151413.12	0.00321056	0.147414	0.469571	0.00103281	0.00213609	-1.04839
ENSG00000166263	STXBP4	ENSG00000166263.9	0.00365914	0.147559	0.469734	0.00072179	0.00188839	-1.38751
ENSG00000124098	FAM210B	ENSG00000124098.9	0.00227685	0.147757	0.470067	0.000442251	0.00115826	-1.38902
ENSG00000146247	PHIP	ENSG00000146247.13	0.00191036	0.148425	0.470838	0.000932723	0.00129043	-0.468327
ENSG00000178502	KLHL11	ENSG00000178502.5	0.00182879	0.14848	0.470838	0.00319431	0.0048836	-0.61244
ENSG00000136710	CCDC115	ENSG00000136710.5	0.00296441	0.148762	0.470838	0.00156152	0.00293704	-0.91141
ENSG00000087301	TXNDC16	ENSG00000087301.4	0.00440034	0.148788	0.470838	0.00173387	0.00276498	-0.673276
ENSG00000023697	DERA	ENSG00000023697.8	0.00250265	0.149314	0.471406	0.00223164	0.0035117	-0.654068
ENSG00000141424	SLC39A6	ENSG00000141424.8	0.00629013	0.150113	0.47293	0.0021689	0.00338977	-0.644223
ENSG00000102882	MAPK3	ENSG00000102882.7	0.0040685	0.150817	0.474259	0.00353139	0.0056311	-0.67318
ENSG00000178695	KCTD12	ENSG00000178695.4	0.00227463	0.151224	0.474918	0.0015187	0.00296187	-0.963674
ENSG00000125375	ATP5S	ENSG00000125375.10	0.00213605	0.151296	0.474918	0.00143178	0.00275182	-0.942576
ENSG00000161036	LRWD1	ENSG00000161036.6	0.0080625	0.151563	0.47503	0.00297077	0.00471511	-0.666453
ENSG00000145685	LHFPL2	ENSG00000145685.9	0.00141179	0.151607	0.47503	0.00108944	0.00169055	-0.633905
ENSG00000076650	GPATCH1	ENSG00000076650.2	0.00309814	0.151706	0.475124	0.0005702	0.00166161	-1.54304
ENSG00000064042	LIMCH1	ENSG00000064042.13	0.00222529	0.152027	0.475835	0.000438118	0.000967912	-1.14356
ENSG00000196876	SCN8A	ENSG00000196876.9	0.00182658	0.152111	0.475949	0.000755529	0.001334	-0.820195
ENSG00000115163	CENPA	ENSG00000115163.10	0.00257886	0.152518	0.47631	0.00585213	0.00816957	-0.481297
ENSG00000107957	SH3PXD2A	ENSG00000107957.12	0.0029013	0.152585	0.47631	0.000859272	0.00147551	-0.78003
ENSG00000254087	LYN	ENSG00000254087.3	0.00285051	0.152628	0.47631	0.00107376	0.00204433	-0.928958
ENSG00000134107	BHLHE40	ENSG00000134107.4	0.00522797	0.152774	0.476396	0.00247596	0.00362119	-0.548477
ENSG00000096063	SRPK1	ENSG00000096063.10	0.00267998	0.153418	0.477332	0.000867927	0.00123257	-0.506029
ENSG00000198785	GRIN3A	ENSG00000198785.4	0.00413467	0.153618	0.47755	0.019938	0.0458587	-1.20168
ENSG00000204852	TCTN1	ENSG00000204852.11	0.00147105	0.153771	0.477877	0.00375389	0.00506671	-0.432663
ENSG00000184517	ZFP1	ENSG00000184517.7	0.00464322	0.15387	0.477894	0.00099016	0.00197779	-0.998159
ENSG00000069869	NEDD4	ENSG00000069869.11	0.0040534	0.154129	0.478103	0.000549964	0.000795417	-0.532374
ENSG00000123352	SPATS2	ENSG00000123352.13	0.00232837	0.154951	0.479084	0.00119639	0.0021106	-0.818964
ENSG00000101191	DIDO1	ENSG00000101191.12	0.00181497	0.154999	0.479084	0.00113569	0.00159102	-0.48639
ENSG00000253537	PCDHGA7	ENSG00000253537.1	0.00216115	0.155295	0.479084	0.00136529	0.00205607	-0.590688
ENSG00000196678	ERI2	ENSG00000196678.9	0.00421032	0.155429	0.479084	0.00106636	0.00182985	-0.779029
ENSG00000156642	NPTN	ENSG00000156642.12	0.00114239	0.155467	0.479084	0.00605958	0.00805559	-0.410774
ENSG00000175602	CCDC85B	ENSG00000175602.2	0.0245363	0.155775	0.479507	0.00145979	0.00288928	-0.984944
ENSG00000112941	PAPD7	ENSG00000112941.8	0.00412098	0.155819	0.479507	0.000592415	0.00113466	-0.937575
ENSG00000149476	TKFC	ENSG00000149476.10	0.0031297	0.155894	0.47959	0.00246859	0.00446067	-0.853572
ENSG00000011007	ELOA	ENSG00000011007.8	0.00116863	0.155954	0.479628	0.000561988	0.00082134	-0.547441
ENSG00000047230	CTPS2	ENSG00000047230.10	0.00243001	0.156265	0.479869	0.00161501	0.0038261	-1.24433
ENSG00000172244	C5orf34	ENSG00000172244.4	0.00291405	0.156302	0.479869	0.00222564	0.00377017	-0.760408
ENSG00000205413	SAMD9	ENSG00000205413.3	0.006035	0.156606	0.480089	0.00173184	0.00231032	-0.415789
ENSG00000126562	WNK4	ENSG00000126562.12	0.00893722	0.156967	0.48047	0.00319318	0.00631043	-0.982745
ENSG00000151327	FAM177A1	ENSG00000151327.8	0.00311691	0.157273	0.48047	0.00157851	0.0025043	-0.665845
ENSG00000198911	SREBF2	ENSG00000198911.7	0.00393921	0.157445	0.48047	0.00346701	0.00465471	-0.424997
ENSG00000197128	ZNF772	ENSG00000197128.7	0.0043108	0.157448	0.48047	0.00108021	0.00150915	-0.482422
ENSG00000180329	CCDC43	ENSG00000180329.9	0.00242549	0.157469	0.48047	0.00064295	0.00123435	-0.940969
ENSG00000083168	KAT6A	ENSG00000083168.5	0.00231125	0.157634	0.48047	0.000396955	0.000911594	-1.19941
ENSG00000155329	ZCCHC10	ENSG00000155329.7	0.00237819	0.157681	0.48047	0.00110933	0.00217844	-0.973605
ENSG00000166676	TVP23A	ENSG00000166676.10	0.00326014	0.157902	0.480774	0.00213458	0.00322391	-0.594856
ENSG00000270136	MINOS1-NBL1	ENSG00000270136.1	0.00330095	0.158627	0.481753	0.00423616	0.00627413	-0.566659
ENSG00000163702	IL17RC	ENSG00000163702.14	0.00448488	0.158855	0.481855	0.00256281	0.0044976	-0.811431
ENSG00000156603	MED19	ENSG00000156603.10	0.00311595	0.159028	0.481871	0.00412632	0.00734844	-0.832581
ENSG00000073169	SELENOO	ENSG00000073169.9	0.00865828	0.159124	0.481927	0.00589443	0.0093422	-0.664411
ENSG00000100284	TOM1	ENSG00000100284.16	0.0058304	0.159143	0.481927	0.00116823	0.00214107	-0.874002
ENSG00000105866	SP4	ENSG00000105866.9	0.00254432	0.159223	0.482026	0.000728271	0.00154019	-1.08056
ENSG00000213638	ADAT3	ENSG00000213638.4	0.0338488	0.159564	0.482767	0.00291498	0.0108537	-1.89663
ENSG00000116670	MAD2L2	ENSG00000116670.10	0.00511474	0.159924	0.483419	0.00406698	0.00551786	-0.440152
ENSG00000072786	STK10	ENSG00000072786.8	0.0024489	0.160388	0.484532	0.00200959	0.0028967	-0.527505
ENSG00000261934	PCDHGA9	ENSG00000261934.1	0.00215657	0.16046	0.484606	0.00139057	0.00208358	-0.58339
ENSG00000164904	ALDH7A1	ENSG00000164904.11	0.00275208	0.160816	0.484767	0.00581744	0.00845306	-0.539089
ENSG00000253767	PCDHGA8	ENSG00000253767.1	0.00220489	0.160848	0.484767	0.0013854	0.00207545	-0.583116
ENSG00000166946	CCNDBP1	ENSG00000166946.9	0.00142729	0.160886	0.484767	0.00371324	0.0056166	-0.597018
ENSG00000181191	PJA1	ENSG00000181191.11	0.00313821	0.160923	0.484767	0.0020016	0.00393256	-0.974317
ENSG00000139154	AEBP2	ENSG00000139154.10	0.0029491	0.161076	0.484767	0.00312699	0.0044196	-0.499142
ENSG00000196976	LAGE3	ENSG00000196976.5	0.00456752	0.161091	0.484767	0.0028654	0.00465172	-0.699031
ENSG00000137193	PIM1	ENSG00000137193.9	0.00517667	0.161527	0.485643	0.00590933	0.00949552	-0.684253
ENSG00000253305	PCDHGB6	ENSG00000253305.1	0.00227404	0.161732	0.485969	0.00139461	0.00208797	-0.582243
ENSG00000111231	GPN3	ENSG00000111231.4	0.00217972	0.161832	0.486123	0.00346129	0.00518951	-0.584291
ENSG00000253873	PCDHGA11	ENSG00000253873.1	0.00200914	0.162029	0.486426	0.00187485	0.00283108	-0.594577
ENSG00000106524	ANKMY2	ENSG00000106524.4	0.00341206	0.162266	0.48699	0.00227597	0.00409202	-0.846329
ENSG00000170852	KBTBD2	ENSG00000170852.6	0.00387777	0.162669	0.48751	0.00156275	0.00256143	-0.712858
ENSG00000253953	PCDHGB4	ENSG00000253953.1	0.00210479	0.162741	0.487545	0.00138952	0.00207711	-0.579994
ENSG00000110218	PANX1	ENSG00000110218.4	0.00176922	0.163275	0.488354	0.00153537	0.00217157	-0.500157
ENSG00000169926	KLF13	ENSG00000169926.5	0.00460527	0.163302	0.488354	0.00165692	0.00252367	-0.607015
ENSG00000171703	TCEA2	ENSG00000171703.12	0.00968948	0.163562	0.488492	0.00228587	0.0056063	-1.2943
ENSG00000131116	ZNF428	ENSG00000131116.7	0.0102058	0.163833	0.488492	0.00139963	0.00249434	-0.83361
ENSG00000165801	ARHGEF40	ENSG00000165801.5	0.00659672	0.164236	0.489258	0.000721725	0.00171195	-1.24612
ENSG00000125651	GTF2F1	ENSG00000125651.9	0.00480643	0.164713	0.489955	0.00172919	0.00265065	-0.616247
ENSG00000160584	SIK3	ENSG00000160584.11	0.00160313	0.16515	0.490965	0.00203199	0.00307536	-0.597863
ENSG00000185697	MYBL1	ENSG00000185697.12	0.00309949	0.165349	0.491193	0.000757199	0.00111496	-0.558247
ENSG00000158545	ZC3H18	ENSG00000158545.11	0.00707792	0.165422	0.491193	0.00213176	0.00304958	-0.516565
ENSG00000135473	PAN2	ENSG00000135473.10	0.00186078	0.165646	0.491302	0.00154678	0.00211524	-0.451549
ENSG00000197448	GSTK1	ENSG00000197448.9	0.00240187	0.165945	0.491485	0.00197559	0.00435732	-1.14115
ENSG00000100982	PCIF1	ENSG00000100982.7	0.0064987	0.16596	0.491485	0.00378198	0.0059212	-0.646745
ENSG00000110060	PUS3	ENSG00000110060.4	0.0041066	0.166739	0.492057	0.00163427	0.00366282	-1.16431
ENSG00000196950	SLC39A10	ENSG00000196950.9	0.00493291	0.166992	0.49237	0.00347222	0.004911	-0.500159
ENSG00000156273	BACH1	ENSG00000156273.11	0.00332468	0.167303	0.492998	0.000382306	0.000860443	-1.17035
ENSG00000138433	CIR1	ENSG00000138433.11	0.00676734	0.167476	0.493364	0.00157588	0.00313205	-0.990951
ENSG00000112584	FAM120B	ENSG00000112584.9	0.00163255	0.167629	0.49338	0.00144049	0.00229088	-0.669339
ENSG00000164209	SLC25A46	ENSG00000164209.12	0.00402445	0.167758	0.493616	0.0010811	0.00154148	-0.511823
ENSG00000119669	IRF2BPL	ENSG00000119669.3	0.00995363	0.167916	0.493648	0.00370858	0.00511582	-0.464099
ENSG00000105483	CARD8	ENSG00000105483.12	0.00231247	0.168315	0.494279	0.000940799	0.00184766	-0.973738
ENSG00000196155	PLEKHG4	ENSG00000196155.8	0.00376701	0.168327	0.494279	0.00130896	0.00198649	-0.601798
ENSG00000255152	MSH5-SAPCD1	ENSG00000255152.4	0.00191444	0.169235	0.495574	0.00123681	0.00228018	-0.882521
ENSG00000138698	RAP1GDS1	ENSG00000138698.10	0.00417176	0.16926	0.495574	0.00180713	0.00238866	-0.402502
ENSG00000054219	LY75	ENSG00000054219.9	0.00345148	0.169412	0.495731	0.00489601	0.00839159	-0.777339
ENSG00000196814	MVB12B	ENSG00000196814.10	0.00920049	0.169803	0.496398	0.00275224	0.0095754	-1.79873
ENSG00000053918	KCNQ1	ENSG00000053918.11	0.00427254	0.169862	0.496398	0.542135	0.922517	-0.766923
ENSG00000070761	CFAP20	ENSG00000070761.3	0.00188195	0.169887	0.496398	0.00291243	0.00443071	-0.605311
ENSG00000170604	IRF2BP1	ENSG00000170604.3	0.014672	0.170304	0.496465	0.00264524	0.00485814	-0.877007
ENSG00000160087	UBE2J2	ENSG00000160087.16	0.00558961	0.170379	0.496539	0.00238794	0.00356343	-0.577502
ENSG00000079435	LIPE	ENSG00000079435.5	0.0115359	0.170487	0.49671	0.00354498	0.00677198	-0.9338
ENSG00000168763	CNNM3	ENSG00000168763.11	0.0051617	0.171165	0.497677	0.00448347	0.00781276	-0.801217
ENSG00000166478	ZNF143	ENSG00000166478.5	0.00232621	0.171723	0.49815	0.000970781	0.00197642	-1.02567
ENSG00000130731	METTL26	ENSG00000130731.11	0.00979071	0.172669	0.499581	0.00514618	0.00779489	-0.599026
ENSG00000121390	PSPC1	ENSG00000121390.13	0.00169661	0.17296	0.50005	0.00137921	0.00250083	-0.858563
ENSG00000204104	TRAF3IP1	ENSG00000204104.7	0.00302713	0.173176	0.500204	0.00155158	0.00289755	-0.901095
ENSG00000156875	MFSD14A	ENSG00000156875.9	0.00247115	0.173468	0.50076	0.00195515	0.00266144	-0.444925
ENSG00000179889	PDXDC1	ENSG00000179889.14	0.000960378	0.173619	0.500765	0.000741543	0.00127144	-0.777862
ENSG00000134444	KIAA1468	ENSG00000134444.9	0.00354455	0.173843	0.501123	0.00194127	0.00256478	-0.401839
ENSG00000240764	PCDHGC5	ENSG00000240764.2	0.00224155	0.174985	0.503262	0.00139172	0.00205796	-0.564348
ENSG00000136492	BRIP1	ENSG00000136492.4	0.00418974	0.175071	0.503365	0.000863236	0.00133161	-0.62534
ENSG00000100154	TTC28	ENSG00000100154.10	0.00313626	0.175276	0.503811	0.0023255	0.00362274	-0.639541
ENSG00000172059	KLF11	ENSG00000172059.6	0.00212442	0.175473	0.50408	0.00111963	0.00296412	-1.40458
ENSG00000076554	TPD52	ENSG00000076554.11	0.00287736	0.175519	0.50408	0.00147739	0.00218591	-0.565181
ENSG00000135631	RAB11FIP5	ENSG00000135631.11	0.00402587	0.176331	0.505228	0.0014071	0.00205589	-0.547041
ENSG00000118402	ELOVL4	ENSG00000118402.5	0.00474742	0.176548	0.505228	0.00443803	0.00680003	-0.615622
ENSG00000099999	RNF215	ENSG00000099999.10	0.0064723	0.176855	0.505895	0.00173985	0.00402252	-1.20914
ENSG00000184916	JAG2	ENSG00000184916.4	0.00763395	0.176938	0.505988	0.142948	0.329112	-1.20309
ENSG00000105085	MED26	ENSG00000105085.6	0.0031618	0.176988	0.505988	0.00138775	0.00272132	-0.97156
ENSG00000260170	ENSG00000260170	ENSG00000260170.1	0.00362681	0.177621	0.506602	0.00306217	0.00534015	-0.802324
ENSG00000106268	NUDT1	ENSG00000106268.11	0.00948063	0.177894	0.506709	0.0081377	0.011503	-0.499316
ENSG00000213185	FAM24B	ENSG00000213185.2	0.00364501	0.178336	0.507156	0.0036645	0.0067406	-0.879258
ENSG00000112773	FAM46A	ENSG00000112773.11	0.00187364	0.178635	0.507671	0.00169928	0.00267304	-0.653558
ENSG00000138161	CUZD1	ENSG00000138161.8	0.00183122	0.178953	0.508063	0.00282614	0.00502222	-0.829492
ENSG00000164808	SPIDR	ENSG00000164808.12	0.00139574	0.179465	0.508514	0.00126457	0.00174202	-0.462117
ENSG00000175115	PACS1	ENSG00000175115.7	0.0021898	0.179501	0.508514	0.00359744	0.0056077	-0.640439
ENSG00000133812	SBF2	ENSG00000133812.10	0.00211542	0.180222	0.509451	0.00136931	0.00181325	-0.40513
ENSG00000110063	DCPS	ENSG00000110063.4	0.00285089	0.180286	0.509487	0.00187289	0.00349562	-0.900277
ENSG00000101888	NXT2	ENSG00000101888.7	0.00340161	0.180572	0.509915	0.000981631	0.00155794	-0.666384
ENSG00000156384	SFR1	ENSG00000156384.10	0.00312058	0.180792	0.509915	0.00124462	0.00320403	-1.36419
ENSG00000145439	CBR4	ENSG00000145439.7	0.00329884	0.181241	0.510752	0.00303988	0.00465089	-0.613494
ENSG00000078403	MLLT10	ENSG00000078403.12	0.00313829	0.18178	0.511983	0.000591372	0.00124359	-1.07238
ENSG00000167774	ENSG00000167774	ENSG00000167774.2	0.00767082	0.182086	0.51213	0.0063432	0.00900509	-0.505529
ENSG00000117245	KIF17	ENSG00000117245.8	0.0057508	0.182614	0.512883	0.122714	0.202041	-0.719351
ENSG00000068971	PPP2R5B	ENSG00000068971.9	0.00629203	0.182627	0.512883	0.00199242	0.00411179	-1.04525
ENSG00000050438	SLC4A8	ENSG00000050438.12	0.00802848	0.182777	0.512926	0.00843025	0.0136746	-0.697854
ENSG00000126001	CEP250	ENSG00000126001.11	0.00255746	0.183528	0.514316	0.00254041	0.00357509	-0.49292
ENSG00000072958	AP1M1	ENSG00000072958.4	0.00438207	0.183789	0.514645	0.0041909	0.00568098	-0.438881
ENSG00000035499	DEPDC1B	ENSG00000035499.8	0.00413914	0.184497	0.515595	0.0028205	0.00442587	-0.650011
ENSG00000176884	GRIN1	ENSG00000176884.10	0.00398886	0.186081	0.517839	1.46382	2.45801	-0.74775
ENSG00000258529	ENSG00000258529	ENSG00000258529.1	0.00185222	0.186668	0.517944	0.00425615	0.00587392	-0.464774
ENSG00000122565	CBX3	ENSG00000122565.14	0.00338136	0.186879	0.517944	0.000579742	0.000869056	-0.584037
ENSG00000140691	ARMC5	ENSG00000140691.12	0.010513	0.187055	0.517961	0.00111715	0.002389	-1.09659
ENSG00000044446	PHKA2	ENSG00000044446.7	0.00242338	0.187346	0.517961	0.00238806	0.00333228	-0.480671
ENSG00000164180	TMEM161B	ENSG00000164180.9	0.00335468	0.1874	0.517961	0.00183435	0.00275324	-0.585865
ENSG00000101079	NDRG3	ENSG00000101079.16	0.00253858	0.187877	0.518426	0.00303305	0.00438799	-0.532791
ENSG00000159921	GNE	ENSG00000159921.10	0.0011609	0.188528	0.519544	0.00200105	0.00290156	-0.536072
ENSG00000134824	FADS2	ENSG00000134824.9	0.00610067	0.188983	0.520096	0.00682748	0.0101604	-0.573539
ENSG00000261832	ENSG00000261832	ENSG00000261832.1	0.00349429	0.188999	0.520096	0.00580278	0.00809416	-0.480137
ENSG00000144744	UBA3	ENSG00000144744.12	0.00257457	0.189219	0.520132	0.00150613	0.0022949	-0.607581
ENSG00000178685	PARP10	ENSG00000178685.9	0.0144931	0.189291	0.520132	0.00247407	0.00428197	-0.79139
ENSG00000169857	AVEN	ENSG00000169857.3	0.00188374	0.189806	0.520619	0.0013783	0.00233734	-0.761978
ENSG00000137474	MYO7A	ENSG00000137474.15	0.00469183	0.19036	0.521471	0.0590531	0.117688	-0.994881
ENSG00000108039	XPNPEP1	ENSG00000108039.13	0.00129776	0.190726	0.522137	0.00242082	0.00340776	-0.493327
ENSG00000085733	CTTN	ENSG00000085733.11	0.00173693	0.190726	0.522137	0.00141333	0.00187284	-0.40613
ENSG00000055332	EIF2AK2	ENSG00000055332.12	0.00232792	0.191605	0.523831	0.0010052	0.00141024	-0.48846
ENSG00000049883	PTCD2	ENSG00000049883.10	0.00439471	0.192082	0.524425	0.000707889	0.00216879	-1.61529
ENSG00000157895	C12orf43	ENSG00000157895.7	0.00208055	0.192238	0.524564	0.00130511	0.00221674	-0.764265
ENSG00000143401	ANP32E	ENSG00000143401.10	0.0047439	0.192644	0.524947	0.00144318	0.00213344	-0.563932
ENSG00000137760	ALKBH8	ENSG00000137760.10	0.00321521	0.1927	0.524947	0.00100634	0.00163748	-0.702351
ENSG00000100784	RPS6KA5	ENSG00000100784.5	0.00581543	0.192743	0.524947	0.00254167	0.00403868	-0.668106
ENSG00000007392	LUC7L	ENSG00000007392.12	0.00354861	0.192901	0.524951	0.0121272	0.0172922	-0.511868
ENSG00000183309	ZNF623	ENSG00000183309.7	0.00147725	0.193189	0.525468	0.00112663	0.00166221	-0.561087
ENSG00000142694	EVA1B	ENSG00000142694.6	0.0177678	0.193206	0.525468	0.00938435	0.0130966	-0.480861
ENSG00000047188	YTHDC2	ENSG00000047188.11	0.00411677	0.193874	0.526746	0.00148636	0.00216765	-0.544346
ENSG00000144815	NXPE3	ENSG00000144815.10	0.00309965	0.194236	0.526944	0.00155991	0.00222258	-0.510776
ENSG00000144560	VGLL4	ENSG00000144560.9	0.0038027	0.194318	0.526944	0.000922203	0.00173216	-0.909415
ENSG00000068137	PLEKHH3	ENSG00000068137.10	0.0138727	0.194879	0.527768	0.00258839	0.00515253	-0.993225
ENSG00000094914	AAAS	ENSG00000094914.8	0.00570992	0.195553	0.528191	0.00308455	0.00468485	-0.602945
ENSG00000152439	ZNF773	ENSG00000152439.8	0.00256852	0.195557	0.528191	0.00382336	0.00610881	-0.676052
ENSG00000005486	RHBDD2	ENSG00000005486.12	0.00565139	0.195663	0.528191	0.00440826	0.00610589	-0.46999
ENSG00000127329	PTPRB	ENSG00000127329.10	0.00286509	0.195665	0.528191	0.019744	0.031309	-0.665159
ENSG00000112365	ZBTB24	ENSG00000112365.4	0.00180054	0.196393	0.52902	0.000981085	0.00171176	-0.803032
ENSG00000141934	PLPP2	ENSG00000141934.5	0.00390081	0.196625	0.529504	0.00742525	0.00995347	-0.422759
ENSG00000176208	ATAD5	ENSG00000176208.4	0.00311492	0.196781	0.529727	0.000809845	0.00117757	-0.540092
ENSG00000159720	ATP6V0D1	ENSG00000159720.7	0.00243452	0.197009	0.529961	0.004302	0.00569906	-0.405718
ENSG00000115145	STAM2	ENSG00000115145.5	0.00358892	0.197365	0.530221	0.00185096	0.002771	-0.582138
ENSG00000121644	DESI2	ENSG00000121644.14	0.00227019	0.19793	0.531172	0.000304034	0.000554962	-0.868156
ENSG00000102287	GABRE	ENSG00000102287.12	0.00200212	0.1982	0.531435	0.00140523	0.00243616	-0.79381
ENSG00000185404	SP140L	ENSG00000185404.12	0.00182999	0.199695	0.533067	0.000692365	0.00145888	-1.07526
ENSG00000184937	WT1	ENSG00000184937.8	0.00159909	0.199988	0.53365	0.0068643	0.0098217	-0.51686
ENSG00000248672	LY75-CD302	ENSG00000248672.1	0.00336441	0.20041	0.534127	0.00537199	0.00874836	-0.703555
ENSG00000048028	USP28	ENSG00000048028.7	0.00197049	0.200708	0.534131	0.00104337	0.00211416	-1.01883
ENSG00000184445	KNTC1	ENSG00000184445.7	0.00323901	0.200721	0.534131	0.00102373	0.00153953	-0.58866
ENSG00000198081	ZBTB14	ENSG00000198081.6	0.00261025	0.20073	0.534131	0.000763296	0.00186644	-1.28997
ENSG00000135476	ESPL1	ENSG00000135476.7	0.00343667	0.201083	0.534516	0.00174576	0.00269541	-0.626649
ENSG00000156735	BAG4	ENSG00000156735.6	0.00201755	0.201116	0.534516	0.000551801	0.00110865	-1.00659
ENSG00000137871	ZNF280D	ENSG00000137871.15	0.0519527	0.201184	0.534516	0.0126392	0.019358	-0.615019
ENSG00000196704	AMZ2	ENSG00000196704.7	0.00258771	0.201493	0.53494	0.000991398	0.00153497	-0.63067
ENSG00000185658	BRWD1	ENSG00000185658.9	0.00318616	0.201888	0.535206	0.000470915	0.000861711	-0.871736
ENSG00000138785	INTS12	ENSG00000138785.10	0.00171145	0.202722	0.535751	0.0013945	0.00257514	-0.884903
ENSG00000129292	PHF20L1	ENSG00000129292.16	0.00343771	0.202811	0.535811	0.000551098	0.000777002	-0.49561
ENSG00000168813	ZNF507	ENSG00000168813.12	0.00468173	0.202852	0.535811	0.00139212	0.00200216	-0.524273
ENSG00000065883	CDK13	ENSG00000065883.10	0.00133233	0.203092	0.536076	0.00069095	0.00129643	-0.907893
ENSG00000198265	HELZ	ENSG00000198265.7	0.00155124	0.20333	0.536373	0.000745164	0.00120591	-0.694493
ENSG00000120798	NR2C1	ENSG00000120798.12	0.0020852	0.203597	0.536462	0.00144535	0.00283051	-0.969642
ENSG00000103932	RPAP1	ENSG00000103932.7	0.00203787	0.20361	0.536462	0.00212544	0.0032265	-0.602209
ENSG00000165118	C9orf64	ENSG00000165118.10	0.00566306	0.20371	0.536462	0.00338289	0.0114582	-1.76006
ENSG00000186001	LRCH3	ENSG00000186001.8	0.00268636	0.204023	0.536807	0.00174332	0.00241997	-0.473155
ENSG00000197563	PIGN	ENSG00000197563.5	0.00386606	0.204377	0.537164	0.00237212	0.00367505	-0.631584
ENSG00000178996	SNX18	ENSG00000178996.8	0.00207885	0.204802	0.538107	0.000958377	0.00138301	-0.529144
ENSG00000133858	ZFC3H1	ENSG00000133858.11	0.0033327	0.204959	0.538107	0.00108374	0.00150818	-0.476791
ENSG00000006282	SPATA20	ENSG00000006282.15	0.00463482	0.20513	0.538107	0.000427616	0.00108926	-1.34896
ENSG00000169696	ASPSCR1	ENSG00000169696.11	0.0085559	0.205843	0.539125	0.00206472	0.00297714	-0.527977
ENSG00000213347	MXD3	ENSG00000213347.6	0.0025026	0.205873	0.539125	0.00078952	0.00113314	-0.521276
ENSG00000115421	PAPOLG	ENSG00000115421.8	0.00433872	0.206111	0.539187	0.0010278	0.0018985	-0.885305
ENSG00000065970	FOXJ2	ENSG00000065970.4	0.00110659	0.206275	0.539476	0.00126139	0.0018595	-0.559901
ENSG00000269190	FBXO17	ENSG00000269190.1	0.00311424	0.206391	0.539589	0.00204404	0.00330017	-0.691117
ENSG00000073614	KDM5A	ENSG00000073614.7	0.00146014	0.206425	0.539589	0.000638179	0.00098107	-0.620395
ENSG00000198876	DCAF12	ENSG00000198876.8	0.00118674	0.207538	0.541319	0.000979755	0.00137503	-0.488974
ENSG00000169047	IRS1	ENSG00000169047.5	0.00314045	0.207627	0.541319	0.00103913	0.00148752	-0.517524
ENSG00000075413	MARK3	ENSG00000075413.13	0.00142281	0.207675	0.541319	0.000758982	0.0010837	-0.513829
ENSG00000119541	VPS4B	ENSG00000119541.5	0.0018644	0.207859	0.541319	0.00190578	0.00264074	-0.470564
ENSG00000133315	MACROD1	ENSG00000133315.6	0.00930765	0.207887	0.541319	0.00282295	0.00655685	-1.2158
ENSG00000122691	TWIST1	ENSG00000122691.8	0.00392797	0.208817	0.542042	0.00669703	0.0104857	-0.646829
ENSG00000151276	MAGI1	ENSG00000151276.19	0.00224217	0.209027	0.542307	0.000442939	0.00135346	-1.61147
ENSG00000041880	PARP3	ENSG00000041880.10	0.00264472	0.210719	0.544221	0.00208991	0.00330459	-0.661031
ENSG00000257218	GATC	ENSG00000257218.1	0.00126039	0.210815	0.544245	0.00154305	0.00249377	-0.692541
ENSG00000119333	WDR34	ENSG00000119333.7	0.00653246	0.211013	0.544257	0.00245016	0.00348863	-0.509783
ENSG00000204410	MSH5	ENSG00000204410.10	0.00199051	0.211462	0.544834	0.00144073	0.00223339	-0.632438
ENSG00000111676	ATN1	ENSG00000111676.10	0.0217578	0.212157	0.54532	0.00766362	0.0104764	-0.451052
ENSG00000131374	TBC1D5	ENSG00000131374.10	0.00197105	0.213514	0.547599	0.00104986	0.00146287	-0.478603
ENSG00000135090	TAOK3	ENSG00000135090.9	0.00165822	0.214142	0.549069	0.00106207	0.00157798	-0.571196
ENSG00000100916	BRMS1L	ENSG00000100916.9	0.00491044	0.214413	0.549204	0.00164799	0.00317723	-0.947066
ENSG00000101844	ATG4A	ENSG00000101844.13	0.0036389	0.214708	0.549243	0.000413813	0.00118219	-1.51441
ENSG00000173226	IQCB1	ENSG00000173226.12	0.00123499	0.215271	0.549243	0.000625994	0.00115056	-0.878119
ENSG00000254995	STX16-NPEPL1	ENSG00000254995.4	0.00767855	0.215407	0.549243	0.00350634	0.00507958	-0.534745
ENSG00000085415	SEH1L	ENSG00000085415.11	0.00292023	0.215534	0.549243	0.00219009	0.00289749	-0.403813
ENSG00000197774	EME2	ENSG00000197774.8	0.0101822	0.215928	0.549452	0.00075643	0.0018072	-1.25648
ENSG00000186174	BCL9L	ENSG00000186174.8	0.0130963	0.21628	0.549905	0.00253832	0.00372418	-0.55305
ENSG00000177106	EPS8L2	ENSG00000177106.10	0.00830589	0.216874	0.551024	0.00420261	0.0055816	-0.409394
ENSG00000105404	RABAC1	ENSG00000105404.6	0.014252	0.217208	0.551124	0.00819913	0.0112593	-0.457576
ENSG00000011143	MKS1	ENSG00000011143.12	0.00317572	0.217297	0.551124	0.001261	0.0017627	-0.483216
ENSG00000146166	LGSN	ENSG00000146166.12	0.00474583	0.217629	0.551799	0.298305	0.569965	-0.934085
ENSG00000105186	ANKRD27	ENSG00000105186.10	0.0016367	0.217724	0.551799	0.000799201	0.00123236	-0.624796
ENSG00000188647	PTAR1	ENSG00000188647.8	0.00355342	0.217858	0.551799	0.000257453	0.000462435	-0.844943
ENSG00000164543	STK17A	ENSG00000164543.5	0.00410426	0.217893	0.551799	0.00117351	0.00192461	-0.713736
ENSG00000126249	PDCD2L	ENSG00000126249.3	0.00178194	0.217939	0.551799	0.00407916	0.0056056	-0.458596
ENSG00000166435	XRRA1	ENSG00000166435.11	0.00182379	0.218271	0.552319	0.000609144	0.00150191	-1.30195
ENSG00000116898	MRPS15	ENSG00000116898.7	0.0011798	0.218337	0.552319	0.00202039	0.00269262	-0.414379
ENSG00000125686	MED1	ENSG00000125686.7	0.00213866	0.218511	0.552319	0.00117391	0.00176811	-0.59089
ENSG00000221909	FAM200A	ENSG00000221909.2	0.00240641	0.218536	0.552319	0.00114035	0.00288794	-1.34056
ENSG00000119041	GTF3C3	ENSG00000119041.6	0.00316847	0.219972	0.554042	0.00212689	0.00290454	-0.449562
ENSG00000087077	TRIP6	ENSG00000087077.7	0.00949539	0.220035	0.554042	0.00269959	0.00363667	-0.429877
ENSG00000117650	NEK2	ENSG00000117650.8	0.00184377	0.220098	0.554042	0.00274735	0.00377862	-0.459818
ENSG00000120071	KANSL1	ENSG00000120071.8	0.00341346	0.220864	0.554899	0.00168817	0.00243531	-0.528644
ENSG00000119509	INVS	ENSG00000119509.8	0.00311734	0.221001	0.554899	0.00069365	0.00130831	-0.91542
ENSG00000101210	EEF1A2	ENSG00000101210.6	0.00687766	0.221026	0.554899	0.00567592	0.0120509	-1.08622
ENSG00000108479	GALK1	ENSG00000108479.7	0.0122436	0.221045	0.554899	0.00396408	0.00631018	-0.670693
ENSG00000115504	EHBP1	ENSG00000115504.10	0.00196066	0.221429	0.55517	0.00111888	0.00158071	-0.498524
ENSG00000244509	APOBEC3C	ENSG00000244509.3	0.010184	0.221725	0.555543	0.0024626	0.00507672	-1.04371
ENSG00000253159	PCDHGA12	ENSG00000253159.1	0.00219064	0.221883	0.555617	0.00153446	0.00208881	-0.44495
ENSG00000144233	AMMECR1L	ENSG00000144233.5	0.00137779	0.222327	0.556177	0.000565363	0.00087741	-0.634073
ENSG00000166228	PCBD1	ENSG00000166228.4	0.00464631	0.222498	0.556327	0.00287375	0.00820786	-1.51407
ENSG00000162627	SNX7	ENSG00000162627.12	0.00208855	0.222618	0.556351	0.00206653	0.00331593	-0.682203
ENSG00000165533	TTC8	ENSG00000165533.14	0.00294613	0.222829	0.556603	0.00219235	0.00315571	-0.525489
ENSG00000110871	COQ5	ENSG00000110871.10	0.00293912	0.22307	0.556791	0.00318528	0.00516468	-0.697259
ENSG00000117533	VAMP4	ENSG00000117533.10	0.00245971	0.223291	0.556928	0.000683348	0.00156172	-1.19244
ENSG00000088038	CNOT3	ENSG00000088038.13	0.00837316	0.223418	0.556969	0.00284325	0.00411823	-0.534483
ENSG00000269307	ENSG00000269307	ENSG00000269307.1	0.00246521	0.224577	0.558338	0.00117531	0.00169224	-0.525895
ENSG00000175182	FAM131A	ENSG00000175182.9	0.00833297	0.224756	0.558508	0.00212169	0.00382384	-0.849806
ENSG00000167987	VPS37C	ENSG00000167987.6	0.00623133	0.224984	0.558797	0.00126944	0.00226327	-0.834218
ENSG00000112367	FIG4	ENSG00000112367.6	0.00267501	0.225243	0.559165	0.00204595	0.0029596	-0.532631
ENSG00000111912	NCOA7	ENSG00000111912.14	0.00156497	0.225669	0.559775	0.00103468	0.00163118	-0.656731
ENSG00000135999	EPC2	ENSG00000135999.7	0.00405833	0.22582	0.559907	0.000473895	0.000918227	-0.954282
ENSG00000031823	RANBP3	ENSG00000031823.10	0.00512262	0.226246	0.560375	0.00181354	0.00240404	-0.406654
ENSG00000079150	FKBP7	ENSG00000079150.13	0.00337055	0.226681	0.560799	0.00800449	0.0133448	-0.737395
ENSG00000177981	ASB8	ENSG00000177981.6	0.00192709	0.228294	0.562696	0.00160665	0.00251801	-0.648227
ENSG00000185009	AP3M1	ENSG00000185009.8	0.00146958	0.228787	0.562801	0.00130789	0.00194614	-0.573373
ENSG00000066697	MSANTD3	ENSG00000066697.10	0.00130542	0.228855	0.562801	0.000917378	0.00125223	-0.448912
ENSG00000105643	ARRDC2	ENSG00000105643.5	0.00690986	0.228864	0.562801	0.00219812	0.00321273	-0.547528
ENSG00000128908	INO80	ENSG00000128908.11	0.00123875	0.228958	0.562801	0.000782996	0.00112028	-0.516782
ENSG00000160972	PPP1R16A	ENSG00000160972.5	0.0150007	0.229289	0.563152	0.000880739	0.00197467	-1.16483
ENSG00000107872	FBXL15	ENSG00000107872.8	0.0154682	0.22931	0.563152	0.00529485	0.00757586	-0.516819
ENSG00000090006	LTBP4	ENSG00000090006.13	0.0157332	0.22943	0.563309	0.00473726	0.00700745	-0.564835
ENSG00000272916	ENSG00000272916	ENSG00000272916.1	0.0048388	0.230113	0.564711	0.00100521	0.00215155	-1.09789
ENSG00000160271	RALGDS	ENSG00000160271.10	0.00201099	0.230542	0.565422	0.000828993	0.00183695	-1.14788
ENSG00000125843	AP5S1	ENSG00000125843.6	0.00500412	0.231264	0.566177	0.00165467	0.00310377	-0.907481
ENSG00000124103	FAM209A	ENSG00000124103.8	0.00193341	0.231743	0.566981	0.000794262	0.00167379	-1.07543
ENSG00000197879	MYO1C	ENSG00000197879.10	0.00504391	0.231827	0.566981	0.00224225	0.00299461	-0.417417
ENSG00000128739	SNRPN	ENSG00000128739.16	0.00314902	0.232346	0.5677	0.00530373	0.0331966	-2.64596
ENSG00000167565	SERTAD3	ENSG00000167565.8	0.00289641	0.233194	0.569254	0.000896227	0.00220158	-1.29661
ENSG00000105393	BABAM1	ENSG00000105393.11	0.00271988	0.233207	0.569254	0.00109425	0.00158794	-0.537223
ENSG00000006837	CDKL3	ENSG00000006837.7	0.00208138	0.233555	0.569593	0.00227893	0.00305904	-0.424723
ENSG00000170085	SIMC1	ENSG00000170085.13	0.00481696	0.233846	0.569983	0.00180573	0.0057822	-1.67904
ENSG00000095261	PSMD5	ENSG00000095261.9	0.00341229	0.234986	0.571762	0.00206151	0.00283768	-0.461009
ENSG00000256349	ENSG00000256349	ENSG00000256349.1	0.00328562	0.235221	0.571762	0.00179062	0.00316344	-0.821037
ENSG00000158169	FANCC	ENSG00000158169.7	0.00144696	0.235258	0.571762	0.00290052	0.0042265	-0.543152
ENSG00000184584	TMEM173	ENSG00000184584.8	0.00560477	0.235465	0.571762	0.00527736	0.00739834	-0.487384
ENSG00000091732	ZC3HC1	ENSG00000091732.11	0.00200859	0.235741	0.571762	0.00194464	0.0031022	-0.673786
ENSG00000273173	SNURF	ENSG00000273173.1	0.00312905	0.236632	0.572201	0.00539443	0.0331966	-2.62149
ENSG00000008710	PKD1	ENSG00000008710.13	0.0147196	0.236979	0.572491	0.000579789	0.00104829	-0.854434
ENSG00000164258	NDUFS4	ENSG00000164258.7	0.00184067	0.237208	0.572567	0.00303398	0.00427429	-0.494474
ENSG00000008441	NFIX	ENSG00000008441.12	0.00620671	0.237307	0.572595	0.00200222	0.0032911	-0.716965
ENSG00000152104	PTPN14	ENSG00000152104.7	0.00174413	0.237472	0.572645	0.00102401	0.00137962	-0.430044
ENSG00000116044	NFE2L2	ENSG00000116044.11	0.00277853	0.237555	0.572645	0.00218348	0.00288794	-0.403407
ENSG00000141503	MINK1	ENSG00000141503.11	0.00467613	0.238104	0.573832	0.00102173	0.00170114	-0.73549
ENSG00000076067	RBMS2	ENSG00000076067.7	0.00316661	0.238944	0.5749	0.000764376	0.00128726	-0.751946
ENSG00000163050	COQ8A	ENSG00000163050.12	0.00382321	0.239503	0.57555	0.00307957	0.00446564	-0.536139
ENSG00000165487	MICU2	ENSG00000165487.9	0.00317865	0.240056	0.576322	0.00245461	0.00353319	-0.525478
ENSG00000073050	XRCC1	ENSG00000073050.7	0.00384975	0.240202	0.576332	0.00322308	0.00432376	-0.423844
ENSG00000138356	AOX1	ENSG00000138356.9	0.0027566	0.240453	0.576733	0.00125576	0.00188171	-0.583477
ENSG00000139197	PEX5	ENSG00000139197.6	0.00275608	0.240853	0.577416	0.00183555	0.00286756	-0.643608
ENSG00000156876	SASS6	ENSG00000156876.8	0.00365176	0.240934	0.577474	0.00131586	0.00226177	-0.781446
ENSG00000118276	B4GALT6	ENSG00000118276.7	0.00300055	0.242009	0.578947	0.000946122	0.00162383	-0.779304
ENSG00000051341	POLQ	ENSG00000051341.9	0.00345073	0.24309	0.580504	0.000469866	0.000857938	-0.868623
ENSG00000168256	NKIRAS2	ENSG00000168256.13	0.0026024	0.243675	0.580965	0.00121512	0.00170971	-0.492661
ENSG00000019144	PHLDB1	ENSG00000019144.12	0.00583732	0.244473	0.581414	0.00134809	0.00199297	-0.564001
ENSG00000167889	MGAT5B	ENSG00000167889.8	0.00816484	0.244718	0.581414	0.00358469	0.00587407	-0.712513
ENSG00000176124	DLEU1	ENSG00000176124.7	0.00184049	0.244817	0.581414	0.00143492	0.00329271	-1.1983
ENSG00000158161	EYA3	ENSG00000158161.11	0.00225427	0.244882	0.581414	0.0014022	0.00188985	-0.430584
ENSG00000246705	H2AFJ	ENSG00000246705.3	0.00921682	0.244892	0.581414	0.00641134	0.0104989	-0.711547
ENSG00000182973	CNOT10	ENSG00000182973.14	0.00273551	0.244927	0.581414	0.00215785	0.00286201	-0.407433
ENSG00000124225	PMEPA1	ENSG00000124225.11	0.00405405	0.24505	0.581523	0.000627244	0.0012111	-0.949221
ENSG00000133316	WDR74	ENSG00000133316.11	0.0671659	0.245546	0.581921	0.00360953	0.00520959	-0.52936
ENSG00000189144	ZNF573	ENSG00000189144.9	0.00276377	0.245628	0.581921	0.000860909	0.0017849	-1.05191
ENSG00000013503	POLR3B	ENSG00000013503.5	0.00168	0.245998	0.582128	0.00165031	0.00249481	-0.596191
ENSG00000153774	CFDP1	ENSG00000153774.4	0.00178591	0.246616	0.583179	0.00112857	0.00186668	-0.725985
ENSG00000168434	COG7	ENSG00000168434.8	0.00137102	0.24758	0.584123	0.0046185	0.00720531	-0.641635
ENSG00000124789	NUP153	ENSG00000124789.7	0.00211607	0.247739	0.584188	0.000907327	0.00121369	-0.419704
ENSG00000122643	NT5C3A	ENSG00000122643.14	0.00293762	0.248175	0.584669	0.00107961	0.00177459	-0.716968
ENSG00000132613	MTSS1L	ENSG00000132613.10	0.00703481	0.248285	0.584792	0.00134323	0.0018724	-0.479187
ENSG00000116863	ADPRHL2	ENSG00000116863.10	0.00605626	0.248503	0.58503	0.0021496	0.00372288	-0.792353
ENSG00000142784	WDTC1	ENSG00000142784.11	0.0026356	0.24868	0.585203	0.00165086	0.00228967	-0.471928
ENSG00000197461	PDGFA	ENSG00000197461.9	0.00272346	0.248983	0.585543	0.00238914	0.00331551	-0.472742
ENSG00000183087	GAS6	ENSG00000183087.10	0.00745996	0.249085	0.585543	0.00442937	0.00618783	-0.482331
ENSG00000108773	KAT2A	ENSG00000108773.6	0.0029623	0.249554	0.585543	0.00119418	0.00187021	-0.647176
ENSG00000148291	SURF2	ENSG00000148291.5	0.00636767	0.249744	0.585624	0.00172195	0.00288207	-0.743061
ENSG00000108262	GIT1	ENSG00000108262.11	0.00684423	0.250834	0.586814	0.00193279	0.00274073	-0.503872
ENSG00000204217	BMPR2	ENSG00000204217.8	0.00278803	0.25096	0.586836	0.00114886	0.00158474	-0.464042
ENSG00000135930	EIF4E2	ENSG00000135930.9	0.00156933	0.251375	0.58726	0.00107758	0.00160224	-0.572297
ENSG00000159167	STC1	ENSG00000159167.7	0.00297611	0.253315	0.589962	0.00189016	0.0027104	-0.519995
ENSG00000153207	AHCTF1	ENSG00000153207.10	0.00281132	0.253542	0.589997	0.000624217	0.00086573	-0.471868
ENSG00000162729	IGSF8	ENSG00000162729.9	0.0128783	0.253795	0.590309	0.0185119	0.0252792	-0.449497
ENSG00000032389	TSSC1	ENSG00000032389.8	0.00232055	0.253852	0.590309	0.001291	0.00205575	-0.671177
ENSG00000136935	GOLGA1	ENSG00000136935.9	0.00215784	0.254961	0.591218	0.000973305	0.00175013	-0.846498
ENSG00000103145	HCFC1R1	ENSG00000103145.6	0.00788723	0.255065	0.591218	0.00148057	0.00277368	-0.905645
ENSG00000100162	CENPM	ENSG00000100162.10	0.00498333	0.255534	0.591548	0.00428385	0.00736645	-0.782062
ENSG00000204390	HSPA1L	ENSG00000204390.8	0.00820983	0.255674	0.591548	0.00277153	0.00542452	-0.968812
ENSG00000153560	UBP1	ENSG00000153560.7	0.00359252	0.256017	0.591962	0.000617459	0.00100115	-0.697239
ENSG00000125633	CCDC93	ENSG00000125633.6	0.00128545	0.256609	0.592613	0.000561038	0.000913546	-0.703377
ENSG00000073584	SMARCE1	ENSG00000073584.14	0.00241102	0.25781	0.594842	0.000608228	0.000922932	-0.601613
ENSG00000100439	ABHD4	ENSG00000100439.6	0.00406203	0.258044	0.595244	0.00172701	0.00344371	-0.995689
ENSG00000165240	ATP7A	ENSG00000165240.13	0.00315782	0.258904	0.596544	0.00223113	0.00363561	-0.70442
ENSG00000101266	CSNK2A1	ENSG00000101266.12	0.00188903	0.259241	0.596971	0.000483377	0.000777754	-0.686165
ENSG00000213341	CHUK	ENSG00000213341.6	0.00318775	0.259879	0.597835	0.00106885	0.00154317	-0.52984
ENSG00000196670	ZFP62	ENSG00000196670.9	0.00280954	0.260489	0.598534	0.000511701	0.00102623	-1.00399
ENSG00000157181	C1orf27	ENSG00000157181.10	0.00284982	0.261225	0.598986	0.00140487	0.00222452	-0.663052
ENSG00000176383	B3GNT4	ENSG00000176383.8	0.00261782	0.261437	0.598986	0.000422494	0.00071334	-0.75566
ENSG00000259288	BUB1B-PAK6	ENSG00000259288.1	0.00331547	0.261527	0.599026	0.00216192	0.00436715	-1.01438
ENSG00000145191	EIF2B5	ENSG00000145191.7	0.00165827	0.261688	0.599096	0.00143292	0.00195749	-0.450049
ENSG00000087266	SH3BP2	ENSG00000087266.11	0.00431823	0.261733	0.599096	0.000719823	0.000978578	-0.443045
ENSG00000140386	SCAPER	ENSG00000140386.8	0.00441227	0.263315	0.601206	0.000925445	0.00192896	-1.05961
ENSG00000065665	SEC61A2	ENSG00000065665.16	0.0034245	0.263501	0.601495	0.00461425	0.00682373	-0.564464
ENSG00000166888	STAT6	ENSG00000166888.6	0.00288888	0.263682	0.601635	0.00189231	0.00263986	-0.480308
ENSG00000130511	SSBP4	ENSG00000130511.11	0.0123457	0.26419	0.602249	0.00117844	0.00232071	-0.977684
ENSG00000162804	SNED1	ENSG00000162804.9	0.00236379	0.264577	0.602583	0.00519419	0.0119579	-1.20299
ENSG00000100425	BRD1	ENSG00000100425.14	0.0048333	0.264657	0.602631	0.00146712	0.00210438	-0.520405
ENSG00000104835	SARS2	ENSG00000104835.10	0.00627976	0.264894	0.602897	0.00208651	0.003782	-0.858058
ENSG00000253276	CCDC71L	ENSG00000253276.1	0.00597529	0.265043	0.6031	0.00330868	0.00601753	-0.862913
ENSG00000049759	NEDD4L	ENSG00000049759.12	0.00102686	0.266692	0.60484	0.00146497	0.00200659	-0.45387
ENSG00000171853	TRAPPC12	ENSG00000171853.11	0.0023338	0.266709	0.60484	0.00314184	0.00417653	-0.410696
ENSG00000163703	CRELD1	ENSG00000163703.13	0.00494052	0.266783	0.604872	0.00322068	0.00634684	-0.978675
ENSG00000197037	ZSCAN25	ENSG00000197037.6	0.002763	0.267063	0.605234	0.00098614	0.00184769	-0.90586
ENSG00000171206	TRIM8	ENSG00000171206.9	0.00494781	0.267188	0.605382	0.000779866	0.00127789	-0.712464
ENSG00000136122	BORA	ENSG00000136122.11	0.0019095	0.267311	0.605388	0.00213697	0.00355663	-0.734946
ENSG00000163681	SLMAP	ENSG00000163681.10	0.00182851	0.267835	0.606165	0.000873219	0.0011778	-0.431674
ENSG00000164296	TIGD6	ENSG00000164296.6	0.00575724	0.26797	0.606225	0.00218575	0.00376716	-0.785349
ENSG00000163635	ATXN7	ENSG00000163635.13	0.00228433	0.268061	0.606259	0.000426565	0.000934064	-1.13075
ENSG00000183475	ASB7	ENSG00000183475.8	0.00257274	0.269367	0.606741	0.000973573	0.00192752	-0.985384
ENSG00000151702	FLI1	ENSG00000151702.12	0.00361296	0.269702	0.606741	0.0018765	0.00351955	-0.907343
ENSG00000108840	HDAC5	ENSG00000108840.11	0.00650743	0.270318	0.607033	0.00268794	0.00412781	-0.618874
ENSG00000248167	TRIM39-RPP21	ENSG00000248167.3	0.00385845	0.270328	0.607033	0.00408374	0.00619013	-0.60008
ENSG00000139636	LMBR1L	ENSG00000139636.11	0.00260075	0.272476	0.609681	0.00261606	0.00391346	-0.581046
ENSG00000197603	C5orf42	ENSG00000197603.9	0.00383318	0.273	0.609905	0.000694507	0.00100646	-0.535228
ENSG00000126453	BCL2L12	ENSG00000126453.5	0.0073136	0.274489	0.610993	0.00276125	0.00430738	-0.641489
ENSG00000100092	SH3BP1	ENSG00000100092.16	0.00568517	0.274629	0.610993	0.00126982	0.00182635	-0.524335
ENSG00000154144	TBRG1	ENSG00000154144.8	0.00183607	0.274804	0.611015	0.000613407	0.00119173	-0.958134
ENSG00000122481	RWDD3	ENSG00000122481.12	0.00170186	0.275508	0.612111	0.00159288	0.00289715	-0.863
ENSG00000067955	CBFB	ENSG00000067955.9	0.00292551	0.276407	0.613162	0.000910122	0.00137536	-0.595675
ENSG00000139697	SBNO1	ENSG00000139697.7	0.00195844	0.277409	0.614466	0.000816607	0.00117343	-0.523021
ENSG00000088727	KIF9	ENSG00000088727.8	0.00349361	0.277422	0.614466	0.00329649	0.00543214	-0.720591
ENSG00000101574	METTL4	ENSG00000101574.10	0.00205002	0.278317	0.615531	0.00265172	0.00368194	-0.47354
ENSG00000160818	GPATCH4	ENSG00000160818.12	0.00229297	0.278356	0.615531	0.00184439	0.00255368	-0.469429
ENSG00000114491	UMPS	ENSG00000114491.9	0.00106226	0.278441	0.615531	0.00181651	0.00244299	-0.427483
ENSG00000101868	POLA1	ENSG00000101868.6	0.00239453	0.279514	0.616658	0.00114555	0.00168628	-0.557804
ENSG00000163535	SGO2	ENSG00000163535.13	0.00501749	0.279698	0.616683	0.00153701	0.00232518	-0.59722
ENSG00000116741	RGS2	ENSG00000116741.6	0.00841855	0.280391	0.617106	0.00180806	0.00252117	-0.479649
ENSG00000239857	GET4	ENSG00000239857.2	0.00733472	0.280759	0.617511	0.00248387	0.00402027	-0.694701
ENSG00000185504	FAAP100	ENSG00000185504.12	0.00626428	0.281936	0.61933	0.00137663	0.00202997	-0.560319
ENSG00000242419	PCDHGC4	ENSG00000242419.1	0.00236039	0.282737	0.620236	0.00153119	0.00208448	-0.445039
ENSG00000124496	TRERF1	ENSG00000124496.8	0.0013426	0.283014	0.620708	0.00168211	0.00283805	-0.754629
ENSG00000143543	JTB	ENSG00000143543.10	0.00170521	0.28335	0.621065	0.00109481	0.00156841	-0.518618
ENSG00000204590	GNL1	ENSG00000204590.8	0.00779217	0.284474	0.622553	0.00181002	0.00242853	-0.424075
ENSG00000145982	FARS2	ENSG00000145982.7	0.00157115	0.284555	0.622596	0.0040255	0.00601795	-0.580103
ENSG00000178381	ZFAND2A	ENSG00000178381.7	0.00204426	0.285377	0.623851	0.00106291	0.00204404	-0.943401
ENSG00000133114	GPALPP1	ENSG00000133114.13	0.00470499	0.285761	0.623986	0.00163275	0.00241196	-0.562904
ENSG00000182134	TDRKH	ENSG00000182134.11	0.00650629	0.28581	0.623986	0.00311545	0.00449732	-0.529628
ENSG00000015475	BID	ENSG00000015475.14	0.00285371	0.286016	0.624299	0.00235977	0.00392484	-0.733985
ENSG00000187079	TEAD1	ENSG00000187079.10	0.00174466	0.287242	0.625755	0.000448793	0.000625589	-0.479167
ENSG00000151461	UPF2	ENSG00000151461.15	0.00346615	0.287536	0.626249	0.0014774	0.00229145	-0.633202
ENSG00000213722	DDAH2	ENSG00000213722.4	0.0103731	0.287766	0.626249	0.00423414	0.00593204	-0.486459
ENSG00000167930	FAM234A	ENSG00000167930.11	0.00609892	0.287932	0.626249	0.00387343	0.00549131	-0.50354
ENSG00000243335	KCTD7	ENSG00000243335.4	0.00120376	0.288561	0.626731	0.00103921	0.00151185	-0.540823
ENSG00000175634	RPS6KB2	ENSG00000175634.10	0.00611851	0.288829	0.627176	0.00117162	0.00163867	-0.484025
ENSG00000131069	ACSS2	ENSG00000131069.15	0.00403106	0.289104	0.627429	0.00246308	0.00385252	-0.645342
ENSG00000155363	MOV10	ENSG00000155363.14	0.00322206	0.289216	0.627462	0.00289046	0.00399617	-0.467317
ENSG00000132481	TRIM47	ENSG00000132481.2	0.0116028	0.289437	0.627551	0.00411895	0.00646555	-0.650497
ENSG00000188566	NDOR1	ENSG00000188566.7	0.00696245	0.292116	0.629753	0.00472998	0.00628516	-0.410114
ENSG00000033627	ATP6V0A1	ENSG00000033627.10	0.00135984	0.292839	0.629892	0.00316443	0.00432145	-0.44957
ENSG00000120738	EGR1	ENSG00000120738.7	0.00422459	0.292839	0.629892	0.0010003	0.00173818	-0.797145
ENSG00000108469	RECQL5	ENSG00000108469.10	0.00235995	0.292888	0.629892	0.00125086	0.00235071	-0.91018
ENSG00000176225	RTTN	ENSG00000176225.8	0.00435117	0.293003	0.629892	0.00155103	0.00242034	-0.641985
ENSG00000135956	TMEM127	ENSG00000135956.4	0.00177082	0.293153	0.629925	0.00206251	0.00286131	-0.472271
ENSG00000175279	CENPS	ENSG00000175279.17	0.00195359	0.293335	0.630105	0.00143233	0.00282782	-0.981329
ENSG00000164053	ATRIP	ENSG00000164053.13	0.00231728	0.293847	0.630926	0.00176208	0.00283076	-0.683911
ENSG00000142920	AZIN2	ENSG00000142920.12	0.00757051	0.294145	0.631121	0.00167326	0.00398006	-1.25013
ENSG00000096093	EFHC1	ENSG00000096093.10	0.00251422	0.294236	0.63116	0.000810249	0.00191721	-1.24257
ENSG00000075790	BCAP29	ENSG00000075790.6	0.00271973	0.294771	0.631544	0.00270283	0.00374102	-0.46896
ENSG00000270181	BIVM-ERCC5	ENSG00000270181.1	0.00213297	0.297159	0.633784	0.00126283	0.00203889	-0.691121
ENSG00000145819	ARHGAP26	ENSG00000145819.11	0.00297816	0.297706	0.634548	0.00137042	0.00195844	-0.515084
ENSG00000099949	LZTR1	ENSG00000099949.14	0.00618766	0.298212	0.634593	0.000809474	0.00144551	-0.836516
ENSG00000143842	SOX13	ENSG00000143842.10	0.0042326	0.299819	0.636358	0.00111097	0.00310213	-1.48144
ENSG00000170473	PYM1	ENSG00000170473.12	0.00413003	0.300932	0.637376	0.00158698	0.00374195	-1.23751
ENSG00000203950	FAM127B	ENSG00000203950.6	0.00497182	0.301273	0.637696	0.00257338	0.00377242	-0.551829
ENSG00000016864	GLT8D1	ENSG00000016864.12	0.00245519	0.301424	0.637747	0.00474957	0.00641079	-0.432706
ENSG00000162032	SPSB3	ENSG00000162032.11	0.0130202	0.301606	0.637781	0.00149746	0.00331297	-1.14561
ENSG00000011523	CEP68	ENSG00000011523.9	0.00175417	0.301777	0.637824	0.00102485	0.00155254	-0.599209
ENSG00000163605	PPP4R2	ENSG00000163605.10	0.0038949	0.30253	0.638612	0.000645897	0.00101775	-0.656012
ENSG00000172530	BANP	ENSG00000172530.15	0.0041011	0.303125	0.63893	0.00162087	0.00280084	-0.789093
ENSG00000108587	GOSR1	ENSG00000108587.10	0.00188246	0.304421	0.640589	0.000652413	0.00116381	-0.835001
ENSG00000198625	MDM4	ENSG00000198625.8	0.00426028	0.305016	0.640959	0.000480828	0.000751037	-0.643364
ENSG00000106785	TRIM14	ENSG00000106785.10	0.00243567	0.305099	0.640959	0.00150598	0.00216598	-0.524321
ENSG00000140153	WDR20	ENSG00000140153.13	0.00142257	0.305199	0.640959	0.00139122	0.00194277	-0.481761
ENSG00000105287	PRKD2	ENSG00000105287.8	0.00598214	0.306907	0.642597	0.00265827	0.00403763	-0.603025
ENSG00000117859	OSBPL9	ENSG00000117859.14	0.00320311	0.307546	0.643132	0.00124362	0.00176758	-0.507237
ENSG00000168159	RNF187	ENSG00000168159.9	0.00367577	0.308369	0.643917	0.0016027	0.00218267	-0.445593
ENSG00000105983	LMBR1	ENSG00000105983.15	0.00329273	0.309058	0.644461	0.000942315	0.00142891	-0.600638
ENSG00000092098	RNF31	ENSG00000092098.12	0.00310028	0.309077	0.644461	0.000868302	0.00131392	-0.59761
ENSG00000120756	PLS1	ENSG00000120756.8	0.0054196	0.309748	0.645398	0.00134272	0.00196794	-0.551534
ENSG00000257594	GALNT4	ENSG00000257594.2	0.00198044	0.309825	0.645398	0.00270818	0.00396754	-0.550923
ENSG00000083457	ITGAE	ENSG00000083457.7	0.00288189	0.310229	0.645535	0.00278734	0.00375664	-0.430556
ENSG00000135439	AGAP2	ENSG00000135439.7	0.00578599	0.310461	0.645535	0.00327474	0.00819	-1.32248
ENSG00000180228	PRKRA	ENSG00000180228.8	0.00221574	0.310544	0.645535	0.00130945	0.00220374	-0.750988
ENSG00000152404	CWF19L2	ENSG00000152404.11	0.00196263	0.310739	0.645651	0.00101196	0.00214143	-1.08142
ENSG00000139117	CPNE8	ENSG00000139117.9	0.00399515	0.310932	0.645851	0.00266783	0.00353023	-0.404096
ENSG00000143373	ZNF687	ENSG00000143373.13	0.00390765	0.311216	0.645933	0.00180805	0.00255608	-0.499497
ENSG00000147419	CCDC25	ENSG00000147419.12	0.00230604	0.311259	0.645933	0.000519341	0.000968111	-0.898492
ENSG00000080371	RAB21	ENSG00000080371.4	0.00227837	0.312851	0.648231	0.00122166	0.0016532	-0.436424
ENSG00000121058	COIL	ENSG00000121058.4	0.00262969	0.313074	0.648231	0.00117573	0.00161936	-0.461859
ENSG00000167113	COQ4	ENSG00000167113.6	0.00490164	0.313664	0.649029	0.00132243	0.00229973	-0.798275
ENSG00000215421	ZNF407	ENSG00000215421.5	0.00258588	0.313782	0.649029	0.000827539	0.00134632	-0.702122
ENSG00000123124	WWP1	ENSG00000123124.9	0.00253232	0.31385	0.649036	0.000773339	0.00126098	-0.705373
ENSG00000118260	CREB1	ENSG00000118260.10	0.00219131	0.314174	0.649307	0.00103336	0.00142177	-0.460351
ENSG00000142599	RERE	ENSG00000142599.13	0.00915178	0.31434	0.649323	0.00320938	0.00430575	-0.423968
ENSG00000184863	RBM33	ENSG00000184863.6	0.0022484	0.314883	0.649838	0.000866556	0.00153134	-0.821433
ENSG00000116127	ALMS1	ENSG00000116127.13	0.00182206	0.315231	0.650423	0.000684578	0.00100918	-0.559898
ENSG00000177732	SOX12	ENSG00000177732.6	0.0114414	0.315498	0.650632	0.00367884	0.00566634	-0.623166
ENSG00000177485	ZBTB33	ENSG00000177485.6	0.00532074	0.316086	0.650632	0.0015877	0.00239022	-0.590209
ENSG00000022840	RNF10	ENSG00000022840.11	0.00149713	0.317325	0.651406	0.00148281	0.00201233	-0.440526
ENSG00000213920	MDP1	ENSG00000213920.4	0.00239388	0.317325	0.651406	0.00486152	0.00716138	-0.558829
ENSG00000181027	FKRP	ENSG00000181027.6	0.00882278	0.317598	0.651421	0.00130697	0.00234363	-0.842522
ENSG00000177917	ARL6IP6	ENSG00000177917.6	0.00301046	0.317849	0.651421	0.00409478	0.00562719	-0.458628
ENSG00000176055	MBLAC2	ENSG00000176055.9	0.00315278	0.317866	0.651421	0.000827468	0.00149678	-0.855083
ENSG00000172932	ANKRD13D	ENSG00000172932.10	0.0121366	0.317877	0.651421	0.00117327	0.00199565	-0.766326
ENSG00000162869	PPP1R21	ENSG00000162869.11	0.0025489	0.318716	0.652398	0.0026823	0.00382719	-0.512813
ENSG00000168884	TNIP2	ENSG00000168884.10	0.00826884	0.319353	0.653437	0.000967379	0.00149692	-0.629844
ENSG00000148331	ASB6	ENSG00000148331.7	0.00690152	0.319989	0.653676	0.00316478	0.00424337	-0.423106
ENSG00000133983	COX16	ENSG00000133983.10	0.0020284	0.32128	0.655198	0.00245202	0.00385946	-0.654429
ENSG00000268643	ENSG00000268643	ENSG00000268643.1	0.00248842	0.322422	0.656407	0.00346888	0.0046341	-0.417818
ENSG00000132359	RAP1GAP2	ENSG00000132359.9	0.00263294	0.322687	0.656601	0.000889233	0.00120441	-0.437698
ENSG00000183735	TBK1	ENSG00000183735.5	0.00343887	0.322932	0.656624	0.00140353	0.00214914	-0.614699
ENSG00000134318	ROCK2	ENSG00000134318.9	0.0024505	0.323414	0.656995	0.00073245	0.00113932	-0.637367
ENSG00000196998	WDR45	ENSG00000196998.11	0.00532904	0.32374	0.657205	0.0032573	0.00551401	-0.759426
ENSG00000066455	GOLGA5	ENSG00000066455.8	0.00378972	0.324552	0.658332	0.0013104	0.00185003	-0.49754
ENSG00000136444	RSAD1	ENSG00000136444.5	0.00617035	0.325206	0.658748	0.00102876	0.00190509	-0.888958
ENSG00000104219	ZDHHC2	ENSG00000104219.8	0.00303917	0.325464	0.658978	0.000735487	0.00098527	-0.421819
ENSG00000154945	ANKRD40	ENSG00000154945.6	0.00176063	0.325621	0.659163	0.000378584	0.000540734	-0.514306
ENSG00000182253	SYNM	ENSG00000182253.10	0.00197381	0.32715	0.661552	0.00115861	0.00229269	-0.984649
ENSG00000140332	TLE3	ENSG00000140332.11	0.00534288	0.327966	0.662046	0.00170694	0.00243783	-0.514184
ENSG00000183479	TREX2	ENSG00000183479.8	0.0030906	0.328277	0.662409	0.00246418	0.00342452	-0.474791
ENSG00000179029	TMEM107	ENSG00000179029.10	0.00198768	0.328586	0.662622	0.0017323	0.00315858	-0.866588
ENSG00000144426	NBEAL1	ENSG00000144426.14	0.00338449	0.328839	0.662622	0.0004926	0.000681933	-0.469213
ENSG00000172239	PAIP1	ENSG00000172239.9	0.00225455	0.329311	0.663034	0.00161371	0.00215108	-0.41468
ENSG00000087152	ATXN7L3	ENSG00000087152.11	0.00590319	0.330206	0.664143	0.00026376	0.000531076	-1.00969
ENSG00000185684	EP400NL	ENSG00000185684.8	0.00646809	0.331826	0.665195	0.00738494	0.0108767	-0.558578
ENSG00000151553	FAM160B1	ENSG00000151553.10	0.00416078	0.332259	0.665907	0.00180206	0.0025914	-0.524086
ENSG00000100344	PNPLA3	ENSG00000100344.6	0.00176151	0.332686	0.665995	0.00250413	0.00415295	-0.729826
ENSG00000103494	RPGRIP1L	ENSG00000103494.8	0.00438555	0.333477	0.666429	0.00072083	0.00121852	-0.757395
ENSG00000082269	FAM135A	ENSG00000082269.12	0.00420903	0.333597	0.666429	0.000539627	0.000842709	-0.643073
ENSG00000187240	DYNC2H1	ENSG00000187240.9	0.00214692	0.333884	0.666643	0.0012275	0.00178993	-0.54418
ENSG00000140836	ZFHX3	ENSG00000140836.10	0.00301088	0.335276	0.668557	0.00189591	0.00261864	-0.465931
ENSG00000081803	CADPS2	ENSG00000081803.11	0.00440492	0.335428	0.668665	0.00120974	0.00293457	-1.27846
ENSG00000176974	SHMT1	ENSG00000176974.13	0.00337101	0.336018	0.669046	0.00198112	0.00288269	-0.541102
ENSG00000124614	RPS10	ENSG00000124614.9	0.0051125	0.336225	0.669194	0.000215895	0.000318318	-0.560136
ENSG00000213930	GALT	ENSG00000213930.7	0.0021717	0.338009	0.670832	0.00236093	0.0045723	-0.953561
ENSG00000069509	FUNDC1	ENSG00000069509.5	0.00346691	0.338107	0.670832	0.00132519	0.0027115	-1.0329
ENSG00000173039	RELA	ENSG00000173039.14	0.00279539	0.338838	0.671475	0.00200741	0.0027951	-0.477566
ENSG00000029725	RABEP1	ENSG00000029725.12	0.00192801	0.339329	0.671787	0.000419907	0.000626481	-0.577201
ENSG00000112624	GLTSCR1L	ENSG00000112624.8	0.00207883	0.339412	0.671818	0.000748701	0.00163198	-1.12416
ENSG00000137802	MAPKBP1	ENSG00000137802.9	0.00426021	0.33969	0.672104	0.000484098	0.000907185	-0.906098
ENSG00000096060	FKBP5	ENSG00000096060.10	0.00570156	0.339942	0.672334	0.00149718	0.00259473	-0.793337
ENSG00000160953	MUM1	ENSG00000160953.10	0.00455447	0.340239	0.672479	0.00154659	0.0021193	-0.454496
ENSG00000173120	KDM2A	ENSG00000173120.10	0.00159868	0.340312	0.672479	0.00148835	0.00207423	-0.478868
ENSG00000074590	NUAK1	ENSG00000074590.9	0.00182865	0.340387	0.672479	0.000661004	0.00106905	-0.693593
ENSG00000105058	FAM32A	ENSG00000105058.7	0.00270587	0.340485	0.672487	0.000493323	0.000773149	-0.648216
ENSG00000179632	MAF1	ENSG00000179632.5	0.00419511	0.340775	0.672536	0.00134028	0.00191088	-0.511701
ENSG00000157954	WIPI2	ENSG00000157954.10	0.00220528	0.34122	0.672571	0.00144265	0.00213965	-0.568658
ENSG00000172766	NAA16	ENSG00000172766.14	0.00168982	0.341791	0.67335	0.00143661	0.00199046	-0.470437
ENSG00000158467	AHCYL2	ENSG00000158467.12	0.00207311	0.342982	0.673887	0.00212025	0.00434419	-1.03485
ENSG00000166140	ZFYVE19	ENSG00000166140.13	0.00264326	0.343292	0.673887	0.00136197	0.00245073	-0.847515
ENSG00000121005	CRISPLD1	ENSG00000121005.4	0.00385471	0.343537	0.673887	0.00677754	0.0106383	-0.650429
ENSG00000166548	TK2	ENSG00000166548.11	0.0036926	0.34384	0.673887	0.00218915	0.00291185	-0.411566
ENSG00000040933	INPP4A	ENSG00000040933.11	0.00139314	0.344245	0.674139	0.00131379	0.00193977	-0.562151
ENSG00000166855	CLPX	ENSG00000166855.5	0.00256545	0.344422	0.674139	0.00241312	0.00319967	-0.407022
ENSG00000106537	TSPAN13	ENSG00000106537.7	0.00931527	0.344669	0.674139	0.00394418	0.00706627	-0.841225
ENSG00000163539	CLASP2	ENSG00000163539.11	0.00266337	0.344814	0.674251	0.000999827	0.00143386	-0.520159
ENSG00000137073	UBAP2	ENSG00000137073.16	0.0027499	0.344998	0.674251	0.00138494	0.00183849	-0.408703
ENSG00000127445	PIN1	ENSG00000127445.9	0.00757362	0.345061	0.674251	0.00199215	0.00288282	-0.533159
ENSG00000183808	RBM12B	ENSG00000183808.7	0.00179732	0.347411	0.675578	0.000999962	0.00137806	-0.46269
ENSG00000163884	KLF15	ENSG00000163884.3	0.00490387	0.348167	0.676253	0.41301	0.743851	-0.848837
ENSG00000077684	JADE1	ENSG00000077684.11	0.00116645	0.349593	0.67759	0.00122741	0.00163219	-0.411195
ENSG00000172922	RNASEH2C	ENSG00000172922.4	0.00243165	0.351863	0.679108	0.00252109	0.00363729	-0.528815
ENSG00000260371	ENSG00000260371	ENSG00000260371.1	0.00202453	0.35263	0.679825	0.00232085	0.00315911	-0.444867
ENSG00000103260	METRN	ENSG00000103260.4	0.00921905	0.35277	0.679946	0.00383095	0.00579016	-0.595899
ENSG00000258941	ENSG00000258941	ENSG00000258941.2	0.00281441	0.353851	0.681131	0.000953155	0.00186694	-0.969892
ENSG00000119446	RBM18	ENSG00000119446.9	0.00291968	0.354793	0.682671	0.000529673	0.000870533	-0.716795
ENSG00000135698	MPHOSPH6	ENSG00000135698.5	0.00377406	0.356137	0.684471	0.00124388	0.00199249	-0.679728
ENSG00000166348	USP54	ENSG00000166348.13	0.00261296	0.35645	0.684811	0.000762985	0.00155165	-1.02408
ENSG00000141569	TRIM65	ENSG00000141569.6	0.00764003	0.356735	0.68495	0.00178517	0.00279068	-0.644552
ENSG00000136144	RCBTB1	ENSG00000136144.7	0.00272064	0.357048	0.685305	0.0010725	0.00167249	-0.641015
ENSG00000163866	SMIM12	ENSG00000163866.8	0.00118147	0.357291	0.685415	0.000985505	0.00150563	-0.611435
ENSG00000105825	TFPI2	ENSG00000105825.7	0.00305179	0.357513	0.685415	0.00232709	0.00601771	-1.37068
ENSG00000056050	HPF1	ENSG00000056050.6	0.00303989	0.357641	0.685422	0.0007802	0.00171349	-1.13502
ENSG00000134815	DHX34	ENSG00000134815.14	0.084704	0.359473	0.68753	0.00990174	0.0139764	-0.497236
ENSG00000101003	GINS1	ENSG00000101003.8	0.00319346	0.35977	0.687908	0.00139815	0.00199552	-0.513246
ENSG00000113119	TMCO6	ENSG00000113119.8	0.00235232	0.360744	0.689117	0.00110841	0.0020602	-0.89429
ENSG00000171130	ATP6V0E2	ENSG00000171130.13	0.00975809	0.360876	0.689238	0.00209664	0.00478341	-1.18996
ENSG00000187866	FAM122A	ENSG00000187866.6	0.00229811	0.361654	0.690331	0.00136123	0.00188498	-0.469633
ENSG00000112379	ARFGEF3	ENSG00000112379.8	0.00427787	0.361724	0.690334	0.00118956	0.001876	-0.657232
ENSG00000171823	FBXL14	ENSG00000171823.6	0.00650932	0.362041	0.690676	0.00356545	0.00544907	-0.611927
ENSG00000215041	NEURL4	ENSG00000215041.5	0.00427168	0.362613	0.691245	0.000761461	0.00136904	-0.846325
ENSG00000197223	C1D	ENSG00000197223.7	0.00639167	0.363128	0.691604	0.000930115	0.00170222	-0.871938
ENSG00000165886	UBTD1	ENSG00000165886.4	0.0129911	0.36332	0.691604	0.00302665	0.00532599	-0.815328
ENSG00000145022	TCTA	ENSG00000145022.4	0.00343573	0.364282	0.69235	0.00138348	0.00196062	-0.503007
ENSG00000164327	RICTOR	ENSG00000164327.8	0.00358344	0.364293	0.69235	0.00109043	0.00154852	-0.505997
ENSG00000129355	CDKN2D	ENSG00000129355.6	0.00994062	0.364726	0.692649	0.00897258	0.0175899	-0.971152
ENSG00000165983	PTER	ENSG00000165983.10	0.004234	0.364799	0.692657	0.00126042	0.00178269	-0.50015
ENSG00000130005	GAMT	ENSG00000130005.7	0.0129687	0.365301	0.69269	0.00571792	0.00872963	-0.61043
ENSG00000143164	DCAF6	ENSG00000143164.11	0.0014939	0.366879	0.694203	0.00166364	0.00223438	-0.425528
ENSG00000188419	CHM	ENSG00000188419.9	0.00357802	0.367495	0.694764	0.00111865	0.00158932	-0.506648
ENSG00000091436	MAP3K20	ENSG00000091436.12	0.00247746	0.368162	0.69524	0.000831184	0.001118	-0.427674
ENSG00000078142	PIK3C3	ENSG00000078142.7	0.00414878	0.369239	0.696517	0.00117862	0.00225385	-0.935286
ENSG00000262633	ENSG00000262633	ENSG00000262633.1	0.0021313	0.369742	0.696657	0.000970742	0.0014834	-0.611752
ENSG00000173614	NMNAT1	ENSG00000173614.9	0.00212916	0.370485	0.697534	0.00110938	0.00155738	-0.489367
ENSG00000175215	CTDSP2	ENSG00000175215.5	0.00218889	0.37121	0.698376	0.000735866	0.00105467	-0.519283
ENSG00000163848	ZNF148	ENSG00000163848.14	0.00273112	0.371945	0.699271	0.000814872	0.00114364	-0.488988
ENSG00000134909	ARHGAP32	ENSG00000134909.14	0.00231496	0.372267	0.69945	0.000413266	0.000606411	-0.553226
ENSG00000158109	TPRG1L	ENSG00000158109.10	0.00316107	0.372368	0.699511	0.0025784	0.00372829	-0.532035
ENSG00000148498	PARD3	ENSG00000148498.11	0.00154914	0.372986	0.699695	0.00100066	0.00152427	-0.607164
ENSG00000268465	ENSG00000268465	ENSG00000268465.1	0.00637748	0.37389	0.700844	0.00395882	0.0054374	-0.457845
ENSG00000110395	CBL	ENSG00000110395.4	0.00305012	0.376317	0.702477	0.000751665	0.00108996	-0.536117
ENSG00000066557	LRRC40	ENSG00000066557.5	0.00471488	0.376459	0.702477	0.00136011	0.00182356	-0.423027
ENSG00000060491	OGFR	ENSG00000060491.12	0.00981826	0.377181	0.702651	0.00172552	0.00228698	-0.406409
ENSG00000178125	PPP1R42	ENSG00000178125.10	0.00642382	0.377293	0.702731	0.000684399	0.00137094	-1.00226
ENSG00000167513	CDT1	ENSG00000167513.4	0.00884071	0.377374	0.70274	0.00387107	0.00522654	-0.433124
ENSG00000115274	INO80B	ENSG00000115274.10	0.00600786	0.377529	0.70274	0.00100185	0.0014121	-0.495173
ENSG00000167720	SRR	ENSG00000167720.8	0.00207264	0.377775	0.702849	0.00119943	0.00191152	-0.67237
ENSG00000143952	VPS54	ENSG00000143952.15	0.00318549	0.378485	0.70339	0.000549531	0.000736945	-0.423357
ENSG00000177666	PNPLA2	ENSG00000177666.11	0.012163	0.379606	0.704823	0.00777367	0.0104107	-0.421402
ENSG00000005448	WDR54	ENSG00000005448.12	0.00259515	0.380217	0.705307	0.00450456	0.00626628	-0.476221
ENSG00000119242	CCDC92	ENSG00000119242.4	0.00302848	0.380676	0.705378	0.00154597	0.00270642	-0.807868
ENSG00000082996	RNF13	ENSG00000082996.15	0.00246079	0.381661	0.706265	0.00154967	0.00235535	-0.603978
ENSG00000184831	APOO	ENSG00000184831.9	0.00417564	0.383017	0.707142	0.00296532	0.00400549	-0.433788
ENSG00000006432	MAP3K9	ENSG00000006432.11	0.00494345	0.3834	0.707464	0.00291294	0.00453163	-0.637556
ENSG00000151665	PIGF	ENSG00000151665.8	0.00262052	0.384649	0.709086	0.000994072	0.00145647	-0.551053
ENSG00000062598	ELMO2	ENSG00000062598.13	0.00106341	0.385498	0.709533	0.00250811	0.00333704	-0.411969
ENSG00000170419	VSTM2A	ENSG00000170419.6	0.0652614	0.38595	0.709646	0.0838885	0.120167	-0.5185
ENSG00000115020	PIKFYVE	ENSG00000115020.12	0.00160857	0.386151	0.709646	0.000687662	0.000931978	-0.438597
ENSG00000151881	TMEM267	ENSG00000151881.10	0.00531446	0.386484	0.709887	0.00107442	0.00206201	-0.940496
ENSG00000138463	DIRC2	ENSG00000138463.8	0.00298056	0.386853	0.709887	0.003556	0.00529091	-0.573259
ENSG00000178467	P4HTM	ENSG00000178467.13	0.00765846	0.387203	0.710256	0.00304278	0.0051948	-0.771681
ENSG00000132485	ZRANB2	ENSG00000132485.8	0.00439614	0.388192	0.710321	0.0011729	0.00164961	-0.49204
ENSG00000066651	TRMT11	ENSG00000066651.13	0.00374962	0.390198	0.711505	0.000917905	0.00175988	-0.93906
ENSG00000119760	SUPT7L	ENSG00000119760.11	0.00157953	0.390326	0.711505	0.00111205	0.00163724	-0.558049
ENSG00000155545	MIER3	ENSG00000155545.15	0.00762805	0.391358	0.712242	0.000908693	0.00139544	-0.618852
ENSG00000259332	ST20-MTHFS	ENSG00000259332.2	0.00211223	0.3923	0.712786	0.00308518	0.00494317	-0.680079
ENSG00000155893	PXYLP1	ENSG00000155893.7	0.00502915	0.392322	0.712786	0.00299013	0.00529799	-0.825239
ENSG00000164144	ARFIP1	ENSG00000164144.10	0.00351799	0.392776	0.71323	0.00177217	0.00274732	-0.632507
ENSG00000122912	SLC25A16	ENSG00000122912.10	0.00184609	0.393101	0.713613	0.000699163	0.00143294	-1.03527
ENSG00000155256	ZFYVE27	ENSG00000155256.13	0.00220216	0.3932	0.713613	0.00311941	0.00456947	-0.550754
ENSG00000077721	UBE2A	ENSG00000077721.11	0.0017722	0.393327	0.713715	0.00204696	0.00304084	-0.570983
ENSG00000006756	ARSD	ENSG00000006756.11	0.00290194	0.39387	0.713939	0.00113586	0.00255429	-1.16914
ENSG00000089682	RBM41	ENSG00000089682.12	0.0022828	0.394736	0.714003	0.00140756	0.00243787	-0.792427
ENSG00000197579	TOPORS	ENSG00000197579.3	0.0043324	0.394783	0.714003	0.0018656	0.0024708	-0.405342
ENSG00000144909	OSBPL11	ENSG00000144909.7	0.0023962	0.394802	0.714003	0.00160348	0.00228406	-0.510391
ENSG00000189046	ALKBH2	ENSG00000189046.6	0.00208671	0.395949	0.715251	0.00181074	0.00327179	-0.853502
ENSG00000125449	ARMC7	ENSG00000125449.2	0.00655261	0.397207	0.716753	0.000998081	0.00249976	-1.32456
ENSG00000198874	TYW1	ENSG00000198874.8	0.00302623	0.398117	0.717508	0.00140576	0.00217261	-0.628072
ENSG00000172375	C2CD2L	ENSG00000172375.8	0.00593712	0.399051	0.717636	0.00695727	0.0101699	-0.547713
ENSG00000120458	MSANTD2	ENSG00000120458.5	0.00227946	0.399085	0.717636	0.00126309	0.00225659	-0.837191
ENSG00000127824	TUBA4A	ENSG00000127824.9	0.00465284	0.399574	0.717636	0.00501171	0.00798054	-0.671184
ENSG00000046651	OFD1	ENSG00000046651.10	0.00550633	0.399825	0.717636	0.00122111	0.00228242	-0.902366
ENSG00000134152	KATNBL1	ENSG00000134152.6	0.00587906	0.400387	0.717636	0.0010477	0.00152811	-0.544529
ENSG00000124508	BTN2A2	ENSG00000124508.12	0.00232851	0.400417	0.717636	0.00132177	0.00195588	-0.565346
ENSG00000105171	POP4	ENSG00000105171.5	0.0015466	0.400492	0.717636	0.00184325	0.00244131	-0.4054
ENSG00000171634	BPTF	ENSG00000171634.12	0.00193056	0.400674	0.717636	0.000678486	0.000939036	-0.468861
ENSG00000100330	MTMR3	ENSG00000100330.11	0.00189003	0.400951	0.717636	0.00112989	0.001642	-0.539275
ENSG00000110013	SIAE	ENSG00000110013.8	0.00320752	0.401874	0.718223	0.00448942	0.00672383	-0.582753
ENSG00000197183	NOL4L	ENSG00000197183.8	0.00185249	0.403951	0.719879	0.00124881	0.00185796	-0.573163
ENSG00000172346	CSDC2	ENSG00000172346.10	0.00906815	0.406581	0.721367	0.00469758	0.00760795	-0.695589
ENSG00000069943	PIGB	ENSG00000069943.5	0.00315963	0.406886	0.721367	0.00273607	0.00411984	-0.590487
ENSG00000110057	UNC93B1	ENSG00000110057.3	0.0065742	0.406898	0.721367	0.00807155	0.0108555	-0.427506
ENSG00000100410	PHF5A	ENSG00000100410.3	0.00218203	0.406938	0.721367	0.00039252	0.000877573	-1.16075
ENSG00000113108	APBB3	ENSG00000113108.13	0.0038146	0.407674	0.721367	0.00117965	0.00213694	-0.857193
ENSG00000126698	DNAJC8	ENSG00000126698.6	0.00109764	0.407944	0.721367	0.000574357	0.00077724	-0.436412
ENSG00000070366	SMG6	ENSG00000070366.9	0.00270382	0.408004	0.721367	0.00211343	0.00292376	-0.468242
ENSG00000178802	MPI	ENSG00000178802.13	0.00145963	0.40837	0.721405	0.00127748	0.00197389	-0.627742
ENSG00000177370	TIMM22	ENSG00000177370.4	0.00267695	0.408383	0.721405	0.00170741	0.00245106	-0.521596
ENSG00000134058	CDK7	ENSG00000134058.6	0.00200865	0.409816	0.723176	0.0015979	0.00276368	-0.790417
ENSG00000124570	SERPINB6	ENSG00000124570.13	0.001332	0.41047	0.723694	0.00372999	0.00497964	-0.416872
ENSG00000130349	C6orf203	ENSG00000130349.5	0.00250017	0.410799	0.723927	0.00503926	0.00697702	-0.4694
ENSG00000159086	PAXBP1	ENSG00000159086.10	0.00321639	0.410992	0.723927	0.00118979	0.00177166	-0.574394
ENSG00000174579	MSL2	ENSG00000174579.3	0.0026663	0.411428	0.724029	0.00148622	0.00202157	-0.443827
ENSG00000176261	ZBTB8OS	ENSG00000176261.11	0.00314332	0.411523	0.724029	0.000641198	0.00110028	-0.779023
ENSG00000176953	NFATC2IP	ENSG00000176953.6	0.00204241	0.411665	0.724154	0.00112635	0.00178212	-0.661935
ENSG00000185730	ZNF696	ENSG00000185730.3	0.00765531	0.411755	0.724185	0.00112467	0.00192163	-0.772826
ENSG00000221838	AP4M1	ENSG00000221838.5	0.00514819	0.41257	0.72489	0.00193579	0.00258856	-0.419229
ENSG00000062194	GPBP1	ENSG00000062194.11	0.00330823	0.413321	0.725419	0.00100038	0.00133722	-0.418681
ENSG00000148218	ALAD	ENSG00000148218.11	0.00254885	0.413744	0.725685	0.00281429	0.00459613	-0.707651
ENSG00000165102	HGSNAT	ENSG00000165102.10	0.00295155	0.413815	0.725685	0.0014485	0.00274608	-0.922818
ENSG00000109881	CCDC34	ENSG00000109881.12	0.00293795	0.413917	0.725685	0.00179003	0.0024332	-0.442866
ENSG00000174606	ANGEL2	ENSG00000174606.8	0.00254082	0.413977	0.725685	0.00105065	0.00159002	-0.597759
ENSG00000163960	UBXN7	ENSG00000163960.7	0.00212989	0.414676	0.725879	0.0010135	0.00140464	-0.470851
ENSG00000122507	BBS9	ENSG00000122507.16	0.00364424	0.415261	0.725879	0.00157356	0.00267004	-0.762831
ENSG00000142166	IFNAR1	ENSG00000142166.8	0.00309683	0.415344	0.725879	0.00164098	0.00231391	-0.495774
ENSG00000047056	WDR37	ENSG00000047056.10	0.00246456	0.415835	0.725879	0.000799713	0.00153241	-0.938251
ENSG00000143499	SMYD2	ENSG00000143499.9	0.00193661	0.416417	0.72642	0.00177672	0.0025016	-0.493636
ENSG00000197555	SIPA1L1	ENSG00000197555.5	0.00156679	0.417497	0.726863	0.000623319	0.000930635	-0.578244
ENSG00000100209	HSCB	ENSG00000100209.5	0.00225171	0.417625	0.726863	0.00242424	0.0048547	-1.00185
ENSG00000198189	HSD17B11	ENSG00000198189.6	0.00360867	0.418089	0.72719	0.00642204	0.00884119	-0.461207
ENSG00000105640	RPL18A	ENSG00000105640.8	0.00567989	0.420229	0.728352	0.000309462	0.000585609	-0.920174
ENSG00000132434	LANCL2	ENSG00000132434.5	0.00187564	0.422441	0.730071	0.000960468	0.00143439	-0.578632
ENSG00000166526	ZNF3	ENSG00000166526.12	0.00210814	0.424107	0.731222	0.00154603	0.00237428	-0.61892
ENSG00000099992	TBC1D10A	ENSG00000099992.11	0.00556315	0.424366	0.731543	0.00251375	0.00364435	-0.535823
ENSG00000099326	MZF1	ENSG00000099326.4	0.00367084	0.424826	0.731634	0.00122992	0.00204594	-0.734201
ENSG00000187735	TCEA1	ENSG00000187735.8	0.00413062	0.424855	0.731634	0.000275698	0.000489463	-0.828113
ENSG00000099246	RAB18	ENSG00000099246.12	0.00292402	0.425036	0.731821	0.000821515	0.00123144	-0.583984
ENSG00000135315	CEP162	ENSG00000135315.7	0.00483125	0.426265	0.733171	0.000918901	0.00177824	-0.952468
ENSG00000157510	AFAP1L1	ENSG00000157510.9	0.00295269	0.42633	0.733171	0.00121401	0.00175821	-0.534326
ENSG00000113761	ZNF346	ENSG00000113761.7	0.00162846	0.426768	0.733222	0.000520735	0.00122653	-1.23596
ENSG00000188739	RBM34	ENSG00000188739.10	0.00252594	0.426933	0.733222	0.000993863	0.00141662	-0.511332
ENSG00000205808	PLPP6	ENSG00000205808.4	0.0024907	0.427447	0.733451	0.0032866	0.00515869	-0.650408
ENSG00000152102	FAM168B	ENSG00000152102.13	0.00132824	0.427718	0.733554	0.000711661	0.00101324	-0.50971
ENSG00000118096	IFT46	ENSG00000118096.3	0.00330231	0.429441	0.735126	0.000880982	0.0017176	-0.96321
ENSG00000099968	BCL2L13	ENSG00000099968.13	0.00213334	0.429509	0.735126	0.00119824	0.00172091	-0.522254
ENSG00000205981	DNAJC19	ENSG00000205981.2	0.00340091	0.430055	0.735805	0.00151393	0.00251855	-0.734296
ENSG00000244687	UBE2V1	ENSG00000244687.7	0.00161408	0.43029	0.735923	0.000611031	0.000861819	-0.496138
ENSG00000089050	RBBP9	ENSG00000089050.10	0.0023612	0.430507	0.736053	0.00117421	0.00158764	-0.435192
ENSG00000117697	NSL1	ENSG00000117697.10	0.00249601	0.430832	0.736386	0.00122695	0.00172976	-0.495495
ENSG00000111731	C2CD5	ENSG00000111731.8	0.00346188	0.431131	0.736592	0.00140516	0.00203869	-0.536903
ENSG00000131669	NINJ1	ENSG00000131669.5	0.0070481	0.432741	0.737762	0.00185163	0.00304358	-0.716971
ENSG00000134452	FBXO18	ENSG00000134452.15	0.00112592	0.432877	0.737762	0.00217314	0.00288456	-0.408574
ENSG00000164975	SNAPC3	ENSG00000164975.11	0.0030074	0.434379	0.738637	0.00152304	0.00204109	-0.422388
ENSG00000108799	EZH1	ENSG00000108799.8	0.00175976	0.434837	0.738637	0.00096998	0.00196861	-1.02115
ENSG00000203814	HIST2H2BF	ENSG00000203814.5	0.00544832	0.436567	0.740224	0.000100479	0.000184418	-0.876086
ENSG00000106554	CHCHD3	ENSG00000106554.7	0.00188456	0.437796	0.741565	0.00149892	0.00203586	-0.441712
ENSG00000180574	ENSG00000180574	ENSG00000180574.3	0.00147456	0.439323	0.743453	0.0021727	0.00299074	-0.461013
ENSG00000062582	MRPS24	ENSG00000062582.9	0.00377407	0.439886	0.743853	0.00315791	0.00439234	-0.476018
ENSG00000138002	IFT172	ENSG00000138002.10	0.00292158	0.440003	0.743853	0.00153383	0.00254764	-0.732025
ENSG00000178409	BEND3	ENSG00000178409.9	0.00302547	0.442043	0.745711	0.00124722	0.00168948	-0.437868
ENSG00000068024	HDAC4	ENSG00000068024.12	0.00457326	0.44235	0.745711	0.00129847	0.0021316	-0.715119
ENSG00000166912	MTMR10	ENSG00000166912.12	0.00306879	0.442729	0.745946	0.000539889	0.00102399	-0.923465
ENSG00000270617	URGCP-MRPS24	ENSG00000270617.1	0.0027841	0.446647	0.748541	0.0026305	0.00382656	-0.540707
ENSG00000134597	RBMX2	ENSG00000134597.9	0.00276252	0.44779	0.749841	0.000995122	0.0014971	-0.589225
ENSG00000010072	SPRTN	ENSG00000010072.11	0.00146579	0.449133	0.750005	0.00222769	0.00319767	-0.521472
ENSG00000104885	DOT1L	ENSG00000104885.13	0.0118733	0.449311	0.750005	0.00151929	0.00208586	-0.457248
ENSG00000101457	DNTTIP1	ENSG00000101457.8	0.00549791	0.449554	0.750005	0.00345977	0.00460503	-0.412534
ENSG00000147912	FBXO10	ENSG00000147912.8	0.00204669	0.450512	0.750655	0.000611707	0.000878418	-0.522067
ENSG00000068028	RASSF1	ENSG00000068028.13	0.00818633	0.451639	0.751301	0.0027803	0.00390637	-0.490589
ENSG00000069011	PITX1	ENSG00000069011.11	0.0107185	0.452298	0.751716	0.00184377	0.00268443	-0.541955
ENSG00000164283	ESM1	ENSG00000164283.8	0.0137498	0.452462	0.751789	0.0028092	0.00663018	-1.23889
ENSG00000085721	RRN3	ENSG00000085721.8	0.00246341	0.453148	0.752431	0.000753101	0.00111294	-0.563455
ENSG00000111445	RFC5	ENSG00000111445.9	0.00205967	0.4546	0.753395	0.00185507	0.00250873	-0.435484
ENSG00000108669	CYTH1	ENSG00000108669.12	0.00345912	0.455411	0.753989	0.000871292	0.00130378	-0.58147
ENSG00000127334	DYRK2	ENSG00000127334.10	0.00175727	0.456338	0.754941	0.000265695	0.000398848	-0.586068
ENSG00000183354	KIAA2026	ENSG00000183354.7	0.00300441	0.45667	0.754941	0.000367362	0.000578321	-0.654668
ENSG00000116731	PRDM2	ENSG00000116731.18	0.00281821	0.456684	0.754941	0.000958354	0.0015505	-0.694107
ENSG00000166004	CEP295	ENSG00000166004.10	0.00395568	0.457529	0.755069	0.000534519	0.000836316	-0.645807
ENSG00000223496	EXOSC6	ENSG00000223496.1	0.00390494	0.457601	0.755069	0.000324671	0.000474949	-0.548797
ENSG00000174485	DENND4A	ENSG00000174485.10	0.00470432	0.458945	0.755825	0.000466569	0.000925249	-0.98775
ENSG00000170584	NUDCD2	ENSG00000170584.6	0.00291662	0.459847	0.756321	0.00180187	0.0024046	-0.416301
ENSG00000174276	ZNHIT2	ENSG00000174276.5	0.0112559	0.460286	0.756905	0.00311675	0.00727002	-1.22192
ENSG00000150527	CTAGE5	ENSG00000150527.12	0.00255462	0.46172	0.758163	0.000997679	0.00175987	-0.818819
ENSG00000162702	ZNF281	ENSG00000162702.7	0.00128968	0.462731	0.759205	0.000665514	0.000954364	-0.520071
ENSG00000169021	UQCRFS1	ENSG00000169021.4	0.00181858	0.463139	0.759502	0.00102965	0.0015734	-0.611727
ENSG00000100124	ANKRD54	ENSG00000100124.8	0.00271625	0.463813	0.759776	0.00102623	0.00162268	-0.661015
ENSG00000137504	CREBZF	ENSG00000137504.9	0.00219392	0.463909	0.759776	0.00116964	0.00186169	-0.670549
ENSG00000139133	ALG10	ENSG00000139133.2	0.00178099	0.465769	0.761021	0.00215792	0.00332813	-0.625071
ENSG00000068885	IFT80	ENSG00000068885.10	0.00206993	0.46699	0.761613	0.00199688	0.00285004	-0.513235
ENSG00000160216	AGPAT3	ENSG00000160216.14	0.00536397	0.46758	0.761683	0.00132925	0.00185506	-0.480857
ENSG00000077454	LRCH4	ENSG00000077454.11	0.0107263	0.468024	0.761683	0.00252017	0.00344443	-0.450745
ENSG00000198176	TFDP1	ENSG00000198176.8	0.00166731	0.4692	0.762487	0.0003371	0.000575014	-0.770419
ENSG00000020426	MNAT1	ENSG00000020426.6	0.00279249	0.469726	0.763097	0.00142356	0.00216257	-0.603243
ENSG00000157379	DHRS1	ENSG00000157379.9	0.00481959	0.470379	0.763501	0.0029556	0.00618735	-1.06587
ENSG00000164086	DUSP7	ENSG00000164086.8	0.00656539	0.470554	0.763501	0.00298631	0.00400715	-0.424211
ENSG00000144061	NPHP1	ENSG00000144061.8	0.0110435	0.471059	0.763501	0.00277315	0.0042116	-0.602841
ENSG00000161999	JMJD8	ENSG00000161999.7	0.00659303	0.471776	0.76407	0.00176266	0.00242323	-0.459181
ENSG00000118804	STBD1	ENSG00000118804.7	0.00343649	0.473121	0.764187	0.00216182	0.00312863	-0.533286
ENSG00000081913	PHLPP1	ENSG00000081913.9	0.00425364	0.473653	0.764419	0.00170468	0.00334375	-0.971967
ENSG00000181523	SGSH	ENSG00000181523.8	0.00531719	0.473883	0.764458	0.00439494	0.00724725	-0.72159
ENSG00000175826	CTDNEP1	ENSG00000175826.7	0.00605927	0.474705	0.764769	0.00232441	0.00334388	-0.524657
ENSG00000241370	RPP21	ENSG00000241370.1	0.00579972	0.474979	0.765	0.00601414	0.0080896	-0.427708
ENSG00000143507	DUSP10	ENSG00000143507.13	0.00314808	0.475	0.765	0.00208294	0.00347596	-0.738786
ENSG00000172732	MUS81	ENSG00000172732.7	0.00379642	0.479915	0.769837	0.00178936	0.00249072	-0.477115
ENSG00000154237	LRRK1	ENSG00000154237.8	0.00306192	0.480109	0.769902	0.0016114	0.00256772	-0.67218
ENSG00000198315	ZKSCAN8	ENSG00000198315.6	0.00303441	0.48029	0.770007	0.000949558	0.00131043	-0.464708
ENSG00000009830	POMT2	ENSG00000009830.7	0.00309807	0.481209	0.770561	0.00232263	0.00317038	-0.448898
ENSG00000221926	TRIM16	ENSG00000221926.7	0.002554	0.485788	0.775428	0.000610553	0.00102977	-0.754134
ENSG00000133739	LRRCC1	ENSG00000133739.11	0.00449461	0.486611	0.776078	0.000744409	0.00136419	-0.873875
ENSG00000148908	RGS10	ENSG00000148908.10	0.00210085	0.486852	0.776093	0.00314436	0.0052183	-0.730813
ENSG00000204389	HSPA1A	ENSG00000204389.8	0.00884596	0.488264	0.777163	0.000833401	0.00163708	-0.974041
ENSG00000118369	USP35	ENSG00000118369.8	0.00363786	0.488369	0.777207	0.00192294	0.0033373	-0.795369
ENSG00000148343	MIGA2	ENSG00000148343.14	0.00774128	0.488591	0.777314	0.00200876	0.00269488	-0.423916
ENSG00000178694	NSUN3	ENSG00000178694.5	0.00250533	0.488751	0.777324	0.00158965	0.00220012	-0.468879
ENSG00000151893	CACUL1	ENSG00000151893.10	0.00215236	0.489454	0.777704	0.000620927	0.000906345	-0.545636
ENSG00000241058	NSUN6	ENSG00000241058.1	0.00376959	0.490435	0.778526	0.00145688	0.00253644	-0.799925
ENSG00000102302	FGD1	ENSG00000102302.7	0.00483502	0.493681	0.780602	0.00162082	0.00258797	-0.675091
ENSG00000169252	ADRB2	ENSG00000169252.4	0.0038825	0.496419	0.782107	0.00362748	0.00542755	-0.581334
ENSG00000100292	HMOX1	ENSG00000100292.12	0.00533097	0.49652	0.782143	0.00235728	0.00321128	-0.446022
ENSG00000139718	SETD1B	ENSG00000139718.6	0.00941096	0.497538	0.782767	0.00286685	0.00395312	-0.463526
ENSG00000085382	HACE1	ENSG00000085382.7	0.00379108	0.499004	0.783899	0.000810163	0.00114953	-0.504755
ENSG00000140265	ZSCAN29	ENSG00000140265.8	0.0021094	0.500404	0.78458	0.00106524	0.00180617	-0.761754
ENSG00000163818	LZTFL1	ENSG00000163818.12	0.00428106	0.50081	0.784727	0.00107382	0.00189516	-0.819571
ENSG00000187720	THSD4	ENSG00000187720.10	0.00204234	0.502348	0.785923	0.00129844	0.00183825	-0.501558
ENSG00000125826	RBCK1	ENSG00000125826.15	0.00592209	0.504833	0.787796	0.0018649	0.00268793	-0.527398
ENSG00000198000	NOL8	ENSG00000198000.7	0.00317625	0.505583	0.788235	0.00113317	0.00162439	-0.519526
ENSG00000010361	FUZ	ENSG00000010361.9	0.00833363	0.505632	0.788235	0.00183276	0.00268889	-0.552997
ENSG00000105617	LENG1	ENSG00000105617.3	0.00937508	0.506331	0.788714	0.00168058	0.00338518	-1.01027
ENSG00000112406	HECA	ENSG00000112406.4	0.00262025	0.506939	0.789051	0.00115255	0.00171885	-0.576605
ENSG00000101052	IFT52	ENSG00000101052.8	0.0016853	0.50879	0.789978	0.00140875	0.00199317	-0.500649
ENSG00000005889	ZFX	ENSG00000005889.11	0.00183252	0.509423	0.790352	0.0010551	0.00150068	-0.508239
ENSG00000119640	ACYP1	ENSG00000119640.4	0.00332127	0.510583	0.791021	0.00314198	0.00462144	-0.556668
ENSG00000205659	LIN52	ENSG00000205659.6	0.00627303	0.512924	0.792225	0.000557935	0.000963418	-0.788064
ENSG00000032219	ARID4A	ENSG00000032219.14	0.00440855	0.51326	0.792398	0.00183789	0.00246529	-0.423711
ENSG00000136141	LRCH1	ENSG00000136141.10	0.00249167	0.514258	0.792957	0.0017433	0.00235736	-0.435356
ENSG00000189050	RNFT1	ENSG00000189050.10	0.00437967	0.51595	0.793709	0.00127748	0.00169055	-0.404195
ENSG00000196878	LAMB3	ENSG00000196878.8	0.00382726	0.516549	0.793709	0.00171545	0.00230615	-0.426895
ENSG00000099804	CDC34	ENSG00000099804.4	0.00850754	0.517955	0.794852	0.00204292	0.00279919	-0.454373
ENSG00000125652	ALKBH7	ENSG00000125652.3	0.0203166	0.518007	0.794852	0.010851	0.0148304	-0.450725
ENSG00000132635	PCED1A	ENSG00000132635.12	0.0108771	0.518298	0.794927	0.00159793	0.00230516	-0.528663
ENSG00000105879	CBLL1	ENSG00000105879.7	0.00286829	0.520558	0.796338	0.00102269	0.00139168	-0.44446
ENSG00000203965	EFCAB7	ENSG00000203965.8	0.0068076	0.521085	0.796661	0.00202499	0.00348784	-0.784418
ENSG00000196456	ZNF775	ENSG00000196456.4	0.0131391	0.523784	0.798009	0.0041523	0.00705598	-0.764935
ENSG00000149179	C11orf49	ENSG00000149179.9	0.00364959	0.524183	0.798101	0.00255911	0.00370476	-0.53374
ENSG00000101945	SUV39H1	ENSG00000101945.12	0.00588832	0.525816	0.798797	0.00198886	0.00339719	-0.772402
ENSG00000204138	PHACTR4	ENSG00000204138.8	0.00287903	0.526774	0.79916	0.00169594	0.00227939	-0.42656
ENSG00000120334	CENPL	ENSG00000120334.11	0.00158417	0.527409	0.7993	0.000642526	0.000898504	-0.48377
ENSG00000108433	GOSR2	ENSG00000108433.11	0.00157247	0.527889	0.799308	0.000589854	0.000778361	-0.40008
ENSG00000106459	NRF1	ENSG00000106459.10	0.00189828	0.527926	0.799308	0.00426995	0.00597477	-0.484665
ENSG00000182185	RAD51B	ENSG00000182185.14	0.00550366	0.529759	0.800414	0.00175907	0.00247918	-0.49505
ENSG00000171443	ZNF524	ENSG00000171443.6	0.0167704	0.531172	0.801615	0.00280229	0.00491645	-0.811011
ENSG00000135451	TROAP	ENSG00000135451.8	0.00296008	0.533172	0.802587	0.00281721	0.00385562	-0.452693
ENSG00000015153	YAF2	ENSG00000015153.10	0.00496443	0.534978	0.803741	0.00151901	0.00241499	-0.668889
ENSG00000160298	C21orf58	ENSG00000160298.13	0.00432607	0.537314	0.805296	0.00234882	0.00330277	-0.491741
ENSG00000157741	UBN2	ENSG00000157741.10	0.00410233	0.53809	0.805296	0.000630915	0.00119712	-0.924054
ENSG00000126804	ZBTB1	ENSG00000126804.9	0.00324758	0.53978	0.806849	0.00168264	0.0022614	-0.426494
ENSG00000100294	MCAT	ENSG00000100294.8	0.00373061	0.545856	0.810413	0.00317759	0.00426854	-0.425809
ENSG00000139112	GABARAPL1	ENSG00000139112.6	0.00411451	0.546066	0.810487	0.00145648	0.00201005	-0.464737
ENSG00000010165	METTL13	ENSG00000010165.15	0.00215075	0.546797	0.811212	0.00181829	0.00281354	-0.629807
ENSG00000205138	SDHAF1	ENSG00000205138.2	0.0141175	0.548389	0.812245	0.00241345	0.00425041	-0.816507
ENSG00000172366	MCRIP2	ENSG00000172366.15	0.0181665	0.548607	0.812245	0.00185706	0.00363335	-0.968277
ENSG00000113790	EHHADH	ENSG00000113790.6	0.00547952	0.548622	0.812245	0.00850293	0.0127762	-0.587432
ENSG00000254999	BRK1	ENSG00000254999.2	0.00121297	0.550702	0.813114	0.0011912	0.00158616	-0.413122
ENSG00000008853	RHOBTB2	ENSG00000008853.12	0.0605501	0.551059	0.813114	0.0120319	0.0161143	-0.421485
ENSG00000099904	ZDHHC8	ENSG00000099904.11	0.0122327	0.551305	0.813114	0.00243153	0.00351583	-0.532001
ENSG00000095906	NUBP2	ENSG00000095906.12	0.0109835	0.552826	0.813716	0.00143295	0.00227627	-0.667686
ENSG00000151806	GUF1	ENSG00000151806.9	0.00297799	0.55296	0.813716	0.00056766	0.000783334	-0.464602
ENSG00000149313	AASDHPPT	ENSG00000149313.6	0.00369493	0.555839	0.815194	0.00183581	0.002434	-0.406916
ENSG00000183765	CHEK2	ENSG00000183765.16	0.00236177	0.557013	0.815383	0.00482072	0.00648872	-0.428683
ENSG00000143224	PPOX	ENSG00000143224.13	0.00559875	0.558786	0.816174	0.00380662	0.00513115	-0.430772
ENSG00000078401	EDN1	ENSG00000078401.6	0.00198162	0.559016	0.816174	0.00117392	0.00172369	-0.554172
ENSG00000040531	CTNS	ENSG00000040531.10	0.00401919	0.560788	0.816805	0.00267175	0.00417532	-0.644104
ENSG00000152465	NMT2	ENSG00000152465.13	0.00173404	0.563308	0.818929	0.00178838	0.00236629	-0.403972
ENSG00000138592	USP8	ENSG00000138592.9	0.00317876	0.563775	0.818929	0.00063414	0.000894985	-0.497062
ENSG00000138814	PPP3CA	ENSG00000138814.12	0.0028054	0.56479	0.81908	0.00168692	0.00236926	-0.490044
ENSG00000166704	ZNF606	ENSG00000166704.7	0.00223976	0.564999	0.819248	0.00147542	0.00215407	-0.545938
ENSG00000176994	SMCR8	ENSG00000176994.9	0.00239935	0.566294	0.820149	0.00137773	0.00198252	-0.525044
ENSG00000176472	ZNF575	ENSG00000176472.6	0.0155439	0.567774	0.820447	0.00365395	0.00612169	-0.744471
ENSG00000160310	PRMT2	ENSG00000160310.12	0.00175599	0.568354	0.820548	0.00184457	0.00246731	-0.419658
ENSG00000149548	CCDC15	ENSG00000149548.10	0.00403427	0.568978	0.82078	0.00150444	0.0025081	-0.737365
ENSG00000132879	FBXO44	ENSG00000132879.9	0.00415691	0.570061	0.821156	0.00331246	0.00442427	-0.417537
ENSG00000136021	SCYL2	ENSG00000136021.13	0.00431195	0.570176	0.821156	0.000627639	0.000879966	-0.487513
ENSG00000157778	PSMG3	ENSG00000157778.4	0.00674715	0.571271	0.821156	0.000609755	0.000992091	-0.702243
ENSG00000143079	CTTNBP2NL	ENSG00000143079.10	0.00227245	0.571359	0.821156	0.00171618	0.00228678	-0.414118
ENSG00000115661	STK16	ENSG00000115661.9	0.00338082	0.571488	0.821224	0.00164723	0.00252738	-0.617601
ENSG00000063587	ZNF275	ENSG00000063587.12	0.00225568	0.571627	0.821289	0.0014097	0.00217463	-0.625381
ENSG00000154059	IMPACT	ENSG00000154059.5	0.0038723	0.572108	0.821289	0.000708143	0.0012019	-0.763203
ENSG00000160113	NR2F6	ENSG00000160113.5	0.008953	0.57598	0.824033	0.00253144	0.00355488	-0.489845
ENSG00000240038	AMY2B	ENSG00000240038.2	0.00542955	0.576883	0.824504	0.00315674	0.004414	-0.483651
ENSG00000156256	USP16	ENSG00000156256.10	0.00504652	0.576979	0.824508	0.000499999	0.000754844	-0.594255
ENSG00000175224	ATG13	ENSG00000175224.12	0.00155344	0.577049	0.824508	0.00130877	0.00174465	-0.414731
ENSG00000168811	IL12A	ENSG00000168811.2	0.00565867	0.577241	0.824605	0.0386755	0.052525	-0.441585
ENSG00000258728	ENSG00000258728	ENSG00000258728.1	0.00779128	0.579009	0.825434	0.00323723	0.00603295	-0.898105
ENSG00000167625	ZNF526	ENSG00000167625.6	0.00606099	0.580306	0.826308	0.00126715	0.00211407	-0.738437
ENSG00000111364	DDX55	ENSG00000111364.11	0.00159247	0.584852	0.828486	0.00111273	0.00166492	-0.581342
ENSG00000167130	DOLPP1	ENSG00000167130.13	0.00173404	0.585997	0.829319	0.00186105	0.00252407	-0.439631
ENSG00000188735	TMEM120B	ENSG00000188735.8	0.00446349	0.586056	0.829319	0.00136003	0.00179973	-0.404142
ENSG00000130787	HIP1R	ENSG00000130787.9	0.00443922	0.588708	0.830232	0.00144179	0.00244161	-0.759976
ENSG00000251503	APITD1-CORT	ENSG00000251503.3	0.00283675	0.592784	0.832884	0.00129087	0.00213869	-0.728378
ENSG00000163382	NAXE	ENSG00000163382.7	0.00249853	0.593998	0.833584	0.0028569	0.00389973	-0.448924
ENSG00000089234	BRAP	ENSG00000089234.11	0.00201614	0.595064	0.834382	0.00243096	0.00322507	-0.407805
ENSG00000148411	NACC2	ENSG00000148411.3	0.0053891	0.596101	0.834906	0.00100843	0.0014097	-0.483282
ENSG00000121680	PEX16	ENSG00000121680.11	0.0113504	0.597366	0.835516	0.00739497	0.00981746	-0.408805
ENSG00000184857	TMEM186	ENSG00000184857.7	0.00346358	0.598926	0.836303	0.00516025	0.00692255	-0.423864
ENSG00000204519	ZNF551	ENSG00000204519.6	0.00311563	0.599289	0.836626	0.000726748	0.00108727	-0.58118
ENSG00000127955	GNAI1	ENSG00000127955.11	0.0036083	0.600815	0.837053	0.00309714	0.00419769	-0.438659
ENSG00000157014	TATDN2	ENSG00000157014.6	0.0033204	0.601069	0.837053	0.00115203	0.00168421	-0.547895
ENSG00000171159	C9orf16	ENSG00000171159.4	0.0263856	0.601715	0.83736	0.00125238	0.00234718	-0.906252
ENSG00000089351	GRAMD1A	ENSG00000089351.10	0.00780759	0.601874	0.837401	0.00254418	0.00373916	-0.555516
ENSG00000071205	ARHGAP10	ENSG00000071205.7	0.00205318	0.603016	0.837578	0.00131622	0.00177702	-0.433069
ENSG00000145388	METTL14	ENSG00000145388.10	0.00169987	0.604345	0.838059	0.00117238	0.0015893	-0.438956
ENSG00000113240	CLK4	ENSG00000113240.8	0.00326269	0.605947	0.838747	0.00079405	0.00127271	-0.680607
ENSG00000158555	GDPD5	ENSG00000158555.10	0.00598118	0.60699	0.839184	0.00458587	0.00610184	-0.412049
ENSG00000172315	TP53RK	ENSG00000172315.5	0.00190729	0.607261	0.839227	0.000655713	0.00100547	-0.616735
ENSG00000215472	RPL17-C18orf32	ENSG00000215472.5	0.00442757	0.609517	0.840298	0.000417993	0.000637679	-0.60935
ENSG00000139793	MBNL2	ENSG00000139793.14	0.00621008	0.612023	0.841522	0.000746171	0.00120224	-0.688146
ENSG00000100523	DDHD1	ENSG00000100523.10	0.00181271	0.612605	0.841681	0.000939788	0.0013209	-0.491117
ENSG00000180448	ARHGAP45	ENSG00000180448.6	0.0074103	0.61264	0.841681	0.00168877	0.00262601	-0.636901
[truncated: 108 more rows]
